# Supplementary material
Source: publisher figshare collection journal article supplement (https://acs.figshare.com/ndownloader/files/5317849)
Supplement: Supplementary file 1 [file 5317849]

 
data_cu_dm14221_0m 
  
_audit_creation_method            SHELXL-2013 
_chemical_name_systematic 
; 
 ? 
; 
_chemical_name_common             ? 
_chemical_melting_point           ? 
_chemical_formula_moiety          ? 
_chemical_formula_sum 
 'C26 H32 O5' 
_chemical_formula_weight          424.51 
  
loop_ 
 _atom_type_symbol 
 _atom_type_description 
 _atom_type_scat_dispersion_real 
 _atom_type_scat_dispersion_imag 
 _atom_type_scat_source 
 'C'  'C'   0.0181   0.0091 
 'International Tables Vol C Tables 4.2.6.8 and 6.1.1.4' 
 'H'  'H'   0.0000   0.0000 
 'International Tables Vol C Tables 4.2.6.8 and 6.1.1.4' 
 'O'  'O'   0.0492   0.0322 
 'International Tables Vol C Tables 4.2.6.8 and 6.1.1.4' 
  
_space_group_crystal_system       triclinic 
_space_group_IT_number            1 
_space_group_name_H-M_alt         'P 1' 
_space_group_name_Hall            'P 1' 
  
_shelx_space_group_comment 
; 
The symmetry employed for this shelxl refinement is uniquely defined 
by the following loop, which should always be used as a source of 
symmetry information in preference to the above space-group names. 
They are only intended as comments. 
; 
  
loop_ 
 _space_group_symop_operation_xyz 
 'x, y, z' 
  
_cell_length_a                    7.2748(2) 
_cell_length_b                    12.3230(3) 
_cell_length_c                    13.1676(3) 
_cell_angle_alpha                 114.2120(10) 
_cell_angle_beta                  90.2770(10) 
_cell_angle_gamma                 91.3950(10) 
_cell_volume                      1076.14(5) 
_cell_formula_units_Z             2 
_cell_measurement_temperature     140(2) 
_cell_measurement_reflns_used     5179 
_cell_measurement_theta_min       3.68 
_cell_measurement_theta_max       69.69 
  
_exptl_crystal_description        blocks 
_exptl_crystal_colour             colourless 
_exptl_crystal_density_meas       ? 
_exptl_crystal_density_method     ? 
_exptl_crystal_density_diffrn     1.310 
_exptl_crystal_F_000              456 
_exptl_transmission_factor_min    ? 
_exptl_transmission_factor_max    ? 
_exptl_crystal_size_max           0.300 
_exptl_crystal_size_mid           0.100 
_exptl_crystal_size_min           0.060 
_exptl_absorpt_coefficient_mu     0.721 
_shelx_estimated_absorpt_T_min    0.813 
_shelx_estimated_absorpt_T_max    0.958 
_exptl_absorpt_correction_type    multi-scan
_exptl_absorpt_correction_T_min   0.5520
_exptl_absorpt_correction_T_max   0.7533
_exptl_absorpt_process_details    sadabs
  
_exptl_special_details 
; 
 ? 
; 
  
_diffrn_ambient_temperature       140(2) 
_diffrn_radiation_wavelength      1.54178 
_diffrn_radiation_type            CuK\a 
_diffrn_source                    ? 
_diffrn_measurement_device_type   'Bruker APEX-II CCD' 
_diffrn_measurement_method        '\f and \w scans' 
_diffrn_detector_area_resol_mean  ? 
_diffrn_reflns_number             8863 
_diffrn_reflns_av_unetI/netI      0.0680 
_diffrn_reflns_av_R_equivalents   0.0416 
_diffrn_reflns_limit_h_min        -8 
_diffrn_reflns_limit_h_max        6 
_diffrn_reflns_limit_k_min        -14 
_diffrn_reflns_limit_k_max        14 
_diffrn_reflns_limit_l_min        -15 
_diffrn_reflns_limit_l_max        15 
_diffrn_reflns_theta_min          3.681 
_diffrn_reflns_theta_max          69.807 
_diffrn_reflns_theta_full         67.679 
_diffrn_measured_fraction_theta_max   0.929 
_diffrn_measured_fraction_theta_full  0.950 
_diffrn_reflns_Laue_measured_fraction_max    0.929 
_diffrn_reflns_Laue_measured_fraction_full   0.950 
_diffrn_reflns_point_group_measured_fraction_max   0.661 
_diffrn_reflns_point_group_measured_fraction_full  0.679 
_reflns_number_total              5362 
_reflns_number_gt                 5188 
_reflns_threshold_expression      'I > 2\s(I)' 
_reflns_Friedel_coverage          0.423 
_reflns_Friedel_fraction_max      0.392 
_reflns_Friedel_fraction_full     0.408 
  
_reflns_special_details 
; 
 Reflections were merged by SHELXL according to the crystal 
 class for the calculation of statistics and refinement. 
  
 _reflns_Friedel_fraction is defined as the number of unique 
 Friedel pairs measured divided by the number that would be 
 possible theoretically, ignoring centric projections and 
 systematic absences. 
; 
  
_computing_data_collection        'Bruker APEX2' 
_computing_cell_refinement        'Bruker SAINT' 
_computing_data_reduction         'Bruker SAINT' 
_computing_structure_solution     'SHELXS-97 (Sheldrick, 2008)' 
_computing_structure_refinement   'SHELXL-2013 (Sheldrick, 2013)' 
_computing_molecular_graphics     'Bruker SHELXTL' 
_computing_publication_material   'Bruker SHELXTL' 
  
_refine_special_details 
; 
 ? 
; 
_refine_ls_structure_factor_coef  Fsqd 
_refine_ls_matrix_type            full 
_refine_ls_weighting_scheme       calc 
_refine_ls_weighting_details 
'w=1/[\s^2^(Fo^2^)+(0.1400P)^2^+0.1174P] where P=(Fo^2^+2Fc^2^)/3' 
_atom_sites_solution_primary      ? 
_atom_sites_solution_secondary    ? 
_atom_sites_solution_hydrogens    geom 
_refine_ls_hydrogen_treatment     constr 
_refine_ls_extinction_method      none 
_refine_ls_extinction_coef        . 
_refine_ls_abs_structure_details 
; 
 Flack x determined using 1462 quotients [(I+)-(I-)]/[(I+)+(I-)] 
 (Parsons and Flack (2004), Acta Cryst. A60, s61). 
; 
_refine_ls_abs_structure_Flack    0.14(19) 
_chemical_absolute_configuration  ad 
_refine_ls_number_reflns          5362 
_refine_ls_number_parameters      569 
_refine_ls_number_restraints      3 
_refine_ls_R_factor_all           0.0648 
_refine_ls_R_factor_gt            0.0628 
_refine_ls_wR_factor_ref          0.1693 
_refine_ls_wR_factor_gt           0.1622 
_refine_ls_goodness_of_fit_ref    1.023 
_refine_ls_restrained_S_all       1.023 
_refine_ls_shift/su_max           0.019 
_refine_ls_shift/su_mean          0.003 
  
loop_ 
 _atom_site_label 
 _atom_site_type_symbol 
 _atom_site_fract_x 
 _atom_site_fract_y 
 _atom_site_fract_z 
 _atom_site_U_iso_or_equiv 
 _atom_site_adp_type 
 _atom_site_occupancy 
 _atom_site_site_symmetry_order 
 _atom_site_calc_flag 
 _atom_site_refinement_flags_posn 
 _atom_site_refinement_flags_adp 
 _atom_site_refinement_flags_occupancy 
 _atom_site_disorder_assembly 
 _atom_site_disorder_group 
O1 O 1.0545(4) 1.2118(2) 0.5311(2) 0.0286(6) Uani 1 1 d . . . . . 
O1A O 0.5076(4) 0.3644(3) -0.0552(2) 0.0297(7) Uani 1 1 d . . . . . 
O2 O 1.2643(5) 1.1365(3) 0.1638(3) 0.0396(8) Uani 1 1 d . . . . . 
O2A O 0.7418(6) 0.4465(3) 0.3109(3) 0.0457(9) Uani 1 1 d . . . . . 
O3 O 0.3947(4) 0.8963(3) 0.2421(2) 0.0328(7) Uani 1 1 d . . . . . 
O3A O -0.1120(5) 0.6872(3) 0.2344(2) 0.0357(7) Uani 1 1 d . . . . . 
O4 O 0.5674(4) 0.9254(2) 0.3874(2) 0.0264(6) Uani 1 1 d . . . . . 
O4A O 0.0566(4) 0.6576(2) 0.0897(2) 0.0274(6) Uani 1 1 d . . . . . 
O5 O 0.5826(6) 0.8390(4) 0.8857(3) 0.0494(9) Uani 1 1 d . . . . . 
O5A O 0.0886(6) 0.7464(3) -0.4099(3) 0.0473(9) Uani 1 1 d . . . . . 
C1 C 1.0128(6) 1.2032(3) 0.4203(3) 0.0263(8) Uani 1 1 d . . . . . 
H1 H 0.9782 1.2839 0.4272 0.032 Uiso 1 1 calc R U . . . 
C1A C 0.4670(6) 0.3734(4) 0.0562(3) 0.0287(9) Uani 1 1 d . . . . . 
H1A H 0.4216 0.2935 0.0496 0.034 Uiso 1 1 calc R U . . . 
C2 C 1.1834(6) 1.1672(3) 0.3478(3) 0.0266(8) Uani 1 1 d . . . . . 
H2A H 1.2680 1.2376 0.3702 0.032 Uiso 1 1 calc R U . . . 
H2B H 1.2468 1.1059 0.3641 0.032 Uiso 1 1 calc R U . . . 
C2A C 0.6440(7) 0.4062(4) 0.1271(3) 0.0318(9) Uani 1 1 d . . . . . 
H2AA H 0.7166 0.3334 0.1058 0.038 Uiso 1 1 calc R U . . . 
H2AB H 0.7168 0.4634 0.1073 0.038 Uiso 1 1 calc R U . . . 
C3 C 1.1505(6) 1.1193(3) 0.2228(3) 0.0267(8) Uani 1 1 d . . . . . 
C3A C 0.6235(6) 0.4597(3) 0.2531(3) 0.0291(9) Uani 1 1 d . . . . . 
C4 C 0.9720(6) 1.0486(4) 0.1747(3) 0.0257(8) Uani 1 1 d . . . . . 
C4A C 0.4529(6) 0.5322(4) 0.3017(3) 0.0265(8) Uani 1 1 d . . . . . 
C5 C 0.8793(6) 1.0120(3) 0.2635(3) 0.0231(8) Uani 1 1 d . . . . . 
H5 H 0.9708 0.9628 0.2814 0.028 Uiso 1 1 calc R U . . . 
C5A C 0.3610(6) 0.5677(3) 0.2133(3) 0.0228(8) Uani 1 1 d . . . . . 
H5A H 0.4568 0.6154 0.1940 0.027 Uiso 1 1 calc R U . . . 
C6 C 0.7081(6) 0.9285(4) 0.2131(3) 0.0270(8) Uani 1 1 d . . . . . 
H6A H 0.6558 0.9516 0.1555 0.032 Uiso 1 1 calc R U . . . 
H6B H 0.7549 0.8473 0.1734 0.032 Uiso 1 1 calc R U . . . 
C6A C 0.1995(6) 0.6534(3) 0.2634(3) 0.0275(8) Uani 1 1 d . . . . . 
H6AA H 0.1457 0.6318 0.3218 0.033 Uiso 1 1 calc R U . . . 
H6AB H 0.2559 0.7341 0.3023 0.033 Uiso 1 1 calc R U . . . 
C7 C 0.5481(6) 0.9176(3) 0.2817(3) 0.0260(8) Uani 1 1 d . . . . . 
C7A C 0.0380(6) 0.6655(3) 0.1945(3) 0.0266(8) Uani 1 1 d . . . . . 
C8 C 0.9924(6) 1.1023(3) 0.5359(3) 0.0240(8) Uani 1 1 d . . . . . 
C8A C 0.4580(6) 0.4750(4) -0.0597(3) 0.0259(8) Uani 1 1 d . . . . . 
C9 C 0.8139(6) 1.0736(3) 0.4678(3) 0.0232(8) Uani 1 1 d . . . . . 
H9 H 0.7195 1.1255 0.5183 0.028 Uiso 1 1 calc R U . . . 
C9A C 0.2846(6) 0.5060(3) 0.0086(3) 0.0223(8) Uani 1 1 d . . . . . 
H9A H 0.1834 0.4552 -0.0411 0.027 Uiso 1 1 calc R U . . . 
C10 C 0.8407(6) 1.1180(3) 0.3750(3) 0.0232(8) Uani 1 1 d . . . . . 
C10A C 0.3077(6) 0.4629(3) 0.1030(3) 0.0233(8) Uani 1 1 d . . . . . 
C11 C 0.7492(5) 0.9473(3) 0.4399(3) 0.0229(8) Uani 1 1 d . . . . . 
H11 H 0.8379 0.8909 0.3882 0.027 Uiso 1 1 calc R U . . . 
C11A C 0.2351(6) 0.6338(3) 0.0364(3) 0.0235(8) Uani 1 1 d . . . . . 
H11A H 0.3309 0.6891 0.0877 0.028 Uiso 1 1 calc R U . . . 
C12 C 0.7360(6) 0.9262(3) 0.5492(3) 0.0246(8) Uani 1 1 d . . . . . 
H12C H 0.6108 0.8948 0.5528 0.030 Uiso 1 1 calc R U . . . 
H12D H 0.8236 0.8641 0.5445 0.030 Uiso 1 1 calc R U . . . 
C12A C 0.2233(6) 0.6545(3) -0.0719(3) 0.0249(8) Uani 1 1 d . . . . . 
H12A H 0.3170 0.7161 -0.0669 0.030 Uiso 1 1 calc R U . . . 
H12B H 0.1012 0.6868 -0.0753 0.030 Uiso 1 1 calc R U . . . 
C13 C 0.7763(6) 1.0380(3) 0.6593(3) 0.0241(8) Uani 1 1 d . . . . . 
C13A C 0.2509(6) 0.5438(3) -0.1825(3) 0.0260(8) Uani 1 1 d . . . . . 
C14 C 0.9427(6) 1.1126(3) 0.6510(3) 0.0260(8) Uani 1 1 d . . . . . 
C14A C 0.4098(6) 0.4666(3) -0.1741(3) 0.0264(8) Uani 1 1 d . . . . . 
C15 C 1.0377(7) 1.1609(4) 0.7460(3) 0.0312(9) Uani 1 1 d . . . . . 
H15 H 1.1412 1.2137 0.7590 0.037 Uiso 1 1 calc R U . . . 
C15A C 0.4975(7) 0.4173(4) -0.2695(3) 0.0307(9) Uani 1 1 d . . . . . 
H15A H 0.5941 0.3629 -0.2828 0.037 Uiso 1 1 calc R U . . . 
C16 C 0.9579(7) 1.1198(4) 0.8316(3) 0.0330(9) Uani 1 1 d . . . . . 
H16C H 0.8768 1.1801 0.8840 0.040 Uiso 1 1 calc R U . . . 
H16D H 1.0559 1.1016 0.8741 0.040 Uiso 1 1 calc R U . . . 
C16A C 0.4240(7) 0.4590(4) -0.3540(3) 0.0330(10) Uani 1 1 d . . . . . 
H16A H 0.3362 0.3998 -0.4067 0.040 Uiso 1 1 calc R U . . . 
H16B H 0.5245 0.4761 -0.3962 0.040 Uiso 1 1 calc R U . . . 
C17 C 0.8477(6) 1.0063(4) 0.7558(3) 0.0271(8) Uani 1 1 d . . . . . 
H17 H 0.9395 0.9426 0.7223 0.033 Uiso 1 1 calc R U . . . 
C17A C 0.3260(6) 0.5751(4) -0.2777(3) 0.0279(9) Uani 1 1 d . . . . . 
H17A H 0.4254 0.6373 -0.2436 0.033 Uiso 1 1 calc R U . . . 
C18 C 0.6020(6) 1.1113(4) 0.6956(3) 0.0305(9) Uani 1 1 d . . . . . 
H18D H 0.5067 1.0649 0.7139 0.046 Uiso 1 1 calc R U . . . 
H18E H 0.5577 1.1308 0.6349 0.046 Uiso 1 1 calc R U . . . 
H18F H 0.6303 1.1850 0.7614 0.046 Uiso 1 1 calc R U . . . 
C18A C 0.0679(7) 0.4715(4) -0.2198(4) 0.0321(9) Uani 1 1 d . . . . . 
H18A H 0.0872 0.3997 -0.2877 0.048 Uiso 1 1 calc R U . . . 
H18B H -0.0242 0.5201 -0.2346 0.048 Uiso 1 1 calc R U . . . 
H18C H 0.0245 0.4487 -0.1607 0.048 Uiso 1 1 calc R U . . . 
C19 C 0.6733(6) 1.1895(4) 0.3712(3) 0.0289(9) Uani 1 1 d . . . . . 
H19D H 0.6520 1.2511 0.4457 0.043 Uiso 1 1 calc R U . . . 
H19E H 0.5647 1.1361 0.3459 0.043 Uiso 1 1 calc R U . . . 
H19F H 0.6962 1.2270 0.3194 0.043 Uiso 1 1 calc R U . . . 
C19A C 0.1323(7) 0.3944(4) 0.1091(3) 0.0298(9) Uani 1 1 d . . . . . 
H19A H 0.1535 0.3553 0.1594 0.045 Uiso 1 1 calc R U . . . 
H19B H 0.0997 0.3343 0.0346 0.045 Uiso 1 1 calc R U . . . 
H19C H 0.0317 0.4499 0.1371 0.045 Uiso 1 1 calc R U . . . 
C20 C 0.7127(6) 0.9606(4) 0.8158(3) 0.0291(9) Uani 1 1 d . . . . . 
C20A C 0.1995(7) 0.6225(4) -0.3388(3) 0.0302(9) Uani 1 1 d . . . . . 
C21 C 0.7141(7) 0.8509(4) 0.8147(4) 0.0380(10) Uani 1 1 d . . . . . 
H21 H 0.7942 0.7899 0.7712 0.046 Uiso 1 1 calc R U . . . 
C21A C 0.2156(8) 0.7328(4) -0.3391(4) 0.0386(11) Uani 1 1 d . . . . . 
H21A H 0.3034 0.7924 -0.2959 0.046 Uiso 1 1 calc R U . . . 
C22 C 0.5712(7) 1.0221(4) 0.8925(3) 0.0389(11) Uani 1 1 d . . . . . 
H22 H 0.5353 1.1016 0.9118 0.047 Uiso 1 1 calc R U . . . 
C22A C 0.0505(8) 0.5641(4) -0.4146(3) 0.0396(11) Uani 1 1 d . . . . . 
H22A H 0.0026 0.4858 -0.4329 0.047 Uiso 1 1 calc R U . . . 
C23 C 0.4998(8) 0.9456(5) 0.9313(4) 0.0453(12) Uani 1 1 d . . . . . 
H23 H 0.4038 0.9635 0.9840 0.054 Uiso 1 1 calc R U . . . 
C23A C -0.0091(8) 0.6423(5) -0.4552(4) 0.0447(12) Uani 1 1 d . . . . . 
H23A H -0.1063 0.6261 -0.5082 0.054 Uiso 1 1 calc R U . . . 
C28 C 1.0187(7) 0.9364(4) 0.0718(3) 0.0315(9) Uani 1 1 d . . . . . 
H28D H 1.0870 0.9592 0.0192 0.047 Uiso 1 1 calc R U . . . 
H28E H 0.9048 0.8933 0.0360 0.047 Uiso 1 1 calc R U . . . 
H28F H 1.0941 0.8851 0.0945 0.047 Uiso 1 1 calc R U . . . 
C28A C 0.5133(7) 0.6443(4) 0.4035(3) 0.0344(10) Uani 1 1 d . . . . . 
H28A H 0.4049 0.6896 0.4385 0.052 Uiso 1 1 calc R U . . . 
H28B H 0.5959 0.6935 0.3801 0.052 Uiso 1 1 calc R U . . . 
H28C H 0.5778 0.6215 0.4570 0.052 Uiso 1 1 calc R U . . . 
C29 C 0.8592(7) 1.1314(4) 0.1386(3) 0.0334(9) Uani 1 1 d . . . . . 
H29D H 0.8658 1.2124 0.1973 0.050 Uiso 1 1 calc R U . . . 
H29E H 0.7307 1.1028 0.1257 0.050 Uiso 1 1 calc R U . . . 
H29F H 0.9093 1.1318 0.0698 0.050 Uiso 1 1 calc R U . . . 
C29A C 0.3338(8) 0.4509(4) 0.3402(4) 0.0379(10) Uani 1 1 d . . . . . 
H29A H 0.2104 0.4831 0.3580 0.057 Uiso 1 1 calc R U . . . 
H29B H 0.3904 0.4476 0.4065 0.057 Uiso 1 1 calc R U . . . 
H29C H 0.3249 0.3706 0.2804 0.057 Uiso 1 1 calc R U . . . 
C30 C 1.1412(6) 1.0066(4) 0.4937(3) 0.0282(8) Uani 1 1 d . . . . . 
H30D H 1.1480 0.9761 0.4124 0.042 Uiso 1 1 calc R U . . . 
H30E H 1.1090 0.9412 0.5149 0.042 Uiso 1 1 calc R U . . . 
H30F H 1.2607 1.0422 0.5270 0.042 Uiso 1 1 calc R U . . . 
C30A C 0.6189(6) 0.5674(4) -0.0177(3) 0.0305(9) Uani 1 1 d . . . . . 
H30A H 0.6356 0.5932 0.0629 0.046 Uiso 1 1 calc R U . . . 
H30B H 0.5914 0.6363 -0.0338 0.046 Uiso 1 1 calc R U . . . 
H30C H 0.7319 0.5314 -0.0554 0.046 Uiso 1 1 calc R U . . . 
  
loop_ 
 _atom_site_aniso_label 
 _atom_site_aniso_U_11 
 _atom_site_aniso_U_22 
 _atom_site_aniso_U_33 
 _atom_site_aniso_U_23 
 _atom_site_aniso_U_13 
 _atom_site_aniso_U_12 
O1 0.0404(18) 0.0272(14) 0.0174(12) 0.0086(11) -0.0040(11) -0.0051(12) 
O1A 0.0432(19) 0.0294(15) 0.0172(13) 0.0095(11) 0.0032(11) 0.0131(12) 
O2 0.046(2) 0.0425(17) 0.0280(15) 0.0126(13) 0.0058(13) -0.0072(14) 
O2A 0.057(2) 0.0469(19) 0.0310(17) 0.0135(15) -0.0088(15) 0.0143(16) 
O3 0.0352(19) 0.0343(15) 0.0277(15) 0.0119(13) -0.0094(12) -0.0032(12) 
O3A 0.038(2) 0.0382(16) 0.0318(16) 0.0143(13) 0.0084(13) 0.0106(13) 
O4 0.0317(17) 0.0275(14) 0.0207(13) 0.0108(11) -0.0033(11) -0.0018(11) 
O4A 0.0337(17) 0.0285(14) 0.0193(12) 0.0087(11) 0.0012(11) 0.0073(11) 
O5 0.059(3) 0.058(2) 0.0388(18) 0.0281(17) -0.0005(16) -0.0180(18) 
O5A 0.061(3) 0.050(2) 0.0409(18) 0.0279(16) -0.0003(17) 0.0188(17) 
C1 0.037(2) 0.0224(18) 0.0208(18) 0.0098(15) -0.0012(15) -0.0004(15) 
C1A 0.044(3) 0.0242(18) 0.0182(17) 0.0084(15) -0.0003(15) 0.0089(16) 
C2 0.031(2) 0.0270(18) 0.0226(19) 0.0114(16) -0.0041(15) -0.0035(15) 
C2A 0.039(3) 0.037(2) 0.0210(18) 0.0128(16) -0.0017(16) 0.0113(17) 
C3 0.033(2) 0.0273(18) 0.0221(18) 0.0120(15) 0.0021(15) 0.0021(15) 
C3A 0.040(3) 0.0275(19) 0.0228(19) 0.0136(16) -0.0042(16) 0.0039(16) 
C4 0.035(2) 0.0278(18) 0.0163(16) 0.0107(15) 0.0007(14) 0.0050(15) 
C4A 0.038(2) 0.0258(18) 0.0170(16) 0.0098(15) -0.0027(14) 0.0006(15) 
C5 0.028(2) 0.0214(17) 0.0192(17) 0.0072(14) -0.0005(14) 0.0031(14) 
C5A 0.030(2) 0.0210(16) 0.0176(16) 0.0083(14) -0.0018(14) -0.0006(14) 
C6 0.033(2) 0.0272(19) 0.0184(16) 0.0072(15) -0.0024(14) 0.0011(16) 
C6A 0.039(2) 0.0254(18) 0.0163(16) 0.0064(14) 0.0007(14) 0.0029(15) 
C7 0.033(2) 0.0204(17) 0.0244(18) 0.0087(15) -0.0060(16) -0.0023(14) 
C7A 0.034(2) 0.0245(17) 0.0226(17) 0.0111(15) 0.0051(15) 0.0041(15) 
C8 0.029(2) 0.0236(17) 0.0181(16) 0.0076(14) -0.0012(14) -0.0032(14) 
C8A 0.033(2) 0.0284(19) 0.0182(17) 0.0108(15) 0.0000(15) 0.0065(15) 
C9 0.030(2) 0.0232(17) 0.0167(16) 0.0080(14) 0.0008(14) 0.0036(14) 
C9A 0.030(2) 0.0217(17) 0.0148(15) 0.0070(13) -0.0022(14) 0.0035(14) 
C10 0.034(2) 0.0216(17) 0.0155(16) 0.0087(14) 0.0011(14) 0.0043(15) 
C10A 0.033(2) 0.0212(17) 0.0169(16) 0.0087(14) -0.0026(14) 0.0010(15) 
C11 0.025(2) 0.0204(16) 0.0220(18) 0.0079(14) -0.0019(14) 0.0002(14) 
C11A 0.028(2) 0.0247(18) 0.0180(17) 0.0095(14) 0.0004(14) 0.0038(14) 
C12 0.035(2) 0.0207(17) 0.0180(17) 0.0080(14) -0.0006(14) -0.0009(14) 
C12A 0.035(2) 0.0236(18) 0.0159(16) 0.0080(14) -0.0004(14) 0.0045(15) 
C13 0.034(2) 0.0229(18) 0.0147(16) 0.0069(15) -0.0002(14) 0.0024(15) 
C13A 0.035(2) 0.0245(19) 0.0187(18) 0.0086(15) -0.0016(15) 0.0034(16) 
C14 0.034(2) 0.0255(18) 0.0166(17) 0.0066(14) -0.0009(15) 0.0004(15) 
C14A 0.037(2) 0.0230(18) 0.0193(17) 0.0082(14) -0.0020(15) 0.0042(15) 
C15 0.039(3) 0.035(2) 0.0195(17) 0.0121(16) -0.0052(15) -0.0069(17) 
C15A 0.041(3) 0.030(2) 0.0220(18) 0.0114(16) 0.0039(16) 0.0111(17) 
C16 0.043(3) 0.036(2) 0.0202(18) 0.0113(17) -0.0057(16) -0.0051(18) 
C16A 0.044(3) 0.034(2) 0.0193(17) 0.0090(16) 0.0035(16) 0.0104(18) 
C17 0.036(2) 0.0294(19) 0.0169(16) 0.0098(15) 0.0002(14) 0.0036(16) 
C17A 0.038(2) 0.0293(19) 0.0176(17) 0.0103(15) 0.0005(15) 0.0055(16) 
C18 0.036(3) 0.0288(19) 0.0272(19) 0.0117(16) 0.0033(16) 0.0061(16) 
C18A 0.037(3) 0.031(2) 0.0258(19) 0.0090(17) -0.0038(16) 0.0006(17) 
C19 0.037(2) 0.0252(18) 0.0268(19) 0.0124(16) 0.0008(16) 0.0078(16) 
C19A 0.041(3) 0.0270(19) 0.0212(18) 0.0096(15) -0.0032(15) -0.0041(16) 
C20 0.038(3) 0.031(2) 0.0159(16) 0.0076(15) -0.0031(15) -0.0047(16) 
C20A 0.044(3) 0.030(2) 0.0158(17) 0.0078(15) 0.0005(15) 0.0116(17) 
C21 0.046(3) 0.039(2) 0.029(2) 0.0148(19) -0.0009(18) -0.006(2) 
C21A 0.054(3) 0.038(2) 0.026(2) 0.0154(18) 0.0005(19) 0.011(2) 
C22 0.046(3) 0.044(3) 0.0217(19) 0.0083(19) 0.0044(18) -0.001(2) 
C22A 0.052(3) 0.041(2) 0.0210(19) 0.0068(18) -0.0056(18) 0.008(2) 
C23 0.042(3) 0.062(3) 0.025(2) 0.013(2) 0.0023(19) -0.014(2) 
C23A 0.048(3) 0.054(3) 0.029(2) 0.013(2) -0.0046(19) 0.020(2) 
C28 0.043(3) 0.030(2) 0.0187(17) 0.0068(16) 0.0040(16) 0.0006(17) 
C28A 0.043(3) 0.035(2) 0.0218(19) 0.0079(18) -0.0058(17) -0.0008(18) 
C29 0.043(3) 0.038(2) 0.027(2) 0.0216(18) 0.0020(17) 0.0084(18) 
C29A 0.058(3) 0.036(2) 0.026(2) 0.0188(18) -0.0061(19) -0.005(2) 
C30 0.031(2) 0.0320(19) 0.0225(17) 0.0125(16) 0.0003(15) 0.0033(16) 
C30A 0.033(2) 0.035(2) 0.0241(18) 0.0128(16) 0.0000(15) 0.0050(17) 
  
_geom_special_details 
; 
 All esds (except the esd in the dihedral angle between two l.s. planes) 
 are estimated using the full covariance matrix.  The cell esds are taken 
 into account individually in the estimation of esds in distances, angles 
 and torsion angles; correlations between esds in cell parameters are only 
 used when they are defined by crystal symmetry.  An approximate (isotropic) 
 treatment of cell esds is used for estimating esds involving l.s. planes. 
; 
  
loop_ 
 _geom_bond_atom_site_label_1 
 _geom_bond_atom_site_label_2 
 _geom_bond_distance 
 _geom_bond_site_symmetry_2 
 _geom_bond_publ_flag 
O1 C8 1.439(5) . ? 
O1 C1 1.449(4) . ? 
O1A C8A 1.442(5) . ? 
O1A C1A 1.457(4) . ? 
O2 C3 1.211(5) . ? 
O2A C3A 1.204(5) . ? 
O3 C7 1.206(5) . ? 
O3A C7A 1.201(6) . ? 
O4 C7 1.362(5) . ? 
O4 C11 1.456(5) . ? 
O4A C7A 1.350(5) . ? 
O4A C11A 1.458(5) . ? 
O5 C23 1.358(8) . ? 
O5 C21 1.387(6) . ? 
O5A C23A 1.353(8) . ? 
O5A C21A 1.371(6) . ? 
C1 C2 1.530(6) . ? 
C1 C10 1.562(6) . ? 
C1 H1 1.0000 . ? 
C1A C2A 1.532(6) . ? 
C1A C10A 1.565(5) . ? 
C1A H1A 1.0000 . ? 
C2 C3 1.518(5) . ? 
C2 H2A 0.9900 . ? 
C2 H2B 0.9900 . ? 
C2A C3A 1.523(5) . ? 
C2A H2AA 0.9900 . ? 
C2A H2AB 0.9900 . ? 
C3 C4 1.527(6) . ? 
C3A C4A 1.529(6) . ? 
C4 C28 1.534(5) . ? 
C4 C29 1.541(5) . ? 
C4 C5 1.566(5) . ? 
C4A C28A 1.531(5) . ? 
C4A C29A 1.545(6) . ? 
C4A C5A 1.555(5) . ? 
C5 C10 1.546(5) . ? 
C5 C6 1.555(6) . ? 
C5 H5 1.0000 . ? 
C5A C10A 1.536(5) . ? 
C5A C6A 1.558(6) . ? 
C5A H5A 1.0000 . ? 
C6 C7 1.513(6) . ? 
C6 H6A 0.9900 . ? 
C6 H6B 0.9900 . ? 
C6A C7A 1.529(6) . ? 
C6A H6AA 0.9900 . ? 
C6A H6AB 0.9900 . ? 
C8 C14 1.515(5) . ? 
C8 C9 1.523(5) . ? 
C8 C30 1.549(6) . ? 
C8A C14A 1.506(5) . ? 
C8A C9A 1.516(5) . ? 
C8A C30A 1.545(6) . ? 
C9 C11 1.507(5) . ? 
C9 C10 1.541(5) . ? 
C9 H9 1.0000 . ? 
C9A C11A 1.517(5) . ? 
C9A C10A 1.550(5) . ? 
C9A H9A 1.0000 . ? 
C10 C19 1.533(6) . ? 
C10A C19A 1.533(6) . ? 
C11 C12 1.567(5) . ? 
C11 H11 1.0000 . ? 
C11A C12A 1.549(5) . ? 
C11A H11A 1.0000 . ? 
C12 C13 1.557(5) . ? 
C12 H12C 0.9900 . ? 
C12 H12D 0.9900 . ? 
C12A C13A 1.552(5) . ? 
C12A H12A 0.9900 . ? 
C12A H12B 0.9900 . ? 
C13 C14 1.533(6) . ? 
C13 C18 1.536(6) . ? 
C13 C17 1.565(5) . ? 
C13A C18A 1.544(6) . ? 
C13A C14A 1.547(5) . ? 
C13A C17A 1.553(5) . ? 
C14 C15 1.326(6) . ? 
C14A C15A 1.324(6) . ? 
C15 C16 1.523(6) . ? 
C15 H15 0.9500 . ? 
C15A C16A 1.505(5) . ? 
C15A H15A 0.9500 . ? 
C16 C17 1.545(6) . ? 
C16 H16C 0.9900 . ? 
C16 H16D 0.9900 . ? 
C16A C17A 1.562(5) . ? 
C16A H16A 0.9900 . ? 
C16A H16B 0.9900 . ? 
C17 C20 1.500(6) . ? 
C17 H17 1.0000 . ? 
C17A C20A 1.496(6) . ? 
C17A H17A 1.0000 . ? 
C18 H18D 0.9800 . ? 
C18 H18E 0.9800 . ? 
C18 H18F 0.9800 . ? 
C18A H18A 0.9800 . ? 
C18A H18B 0.9800 . ? 
C18A H18C 0.9800 . ? 
C19 H19D 0.9800 . ? 
C19 H19E 0.9800 . ? 
C19 H19F 0.9800 . ? 
C19A H19A 0.9800 . ? 
C19A H19B 0.9800 . ? 
C19A H19C 0.9800 . ? 
C20 C21 1.347(6) . ? 
C20 C22 1.440(6) . ? 
C20A C21A 1.363(6) . ? 
C20A C22A 1.433(7) . ? 
C21 H21 0.9500 . ? 
C21A H21A 0.9500 . ? 
C22 C23 1.340(7) . ? 
C22 H22 0.9500 . ? 
C22A C23A 1.357(7) . ? 
C22A H22A 0.9500 . ? 
C23 H23 0.9500 . ? 
C23A H23A 0.9500 . ? 
C28 H28D 0.9800 . ? 
C28 H28E 0.9800 . ? 
C28 H28F 0.9800 . ? 
C28A H28A 0.9800 . ? 
C28A H28B 0.9800 . ? 
C28A H28C 0.9800 . ? 
C29 H29D 0.9800 . ? 
C29 H29E 0.9800 . ? 
C29 H29F 0.9800 . ? 
C29A H29A 0.9800 . ? 
C29A H29B 0.9800 . ? 
C29A H29C 0.9800 . ? 
C30 H30D 0.9800 . ? 
C30 H30E 0.9800 . ? 
C30 H30F 0.9800 . ? 
C30A H30A 0.9800 . ? 
C30A H30B 0.9800 . ? 
C30A H30C 0.9800 . ? 
  
loop_ 
 _geom_angle_atom_site_label_1 
 _geom_angle_atom_site_label_2 
 _geom_angle_atom_site_label_3 
 _geom_angle 
 _geom_angle_site_symmetry_1 
 _geom_angle_site_symmetry_3 
 _geom_angle_publ_flag 
C8 O1 C1 107.6(3) . . ? 
C8A O1A C1A 107.5(3) . . ? 
C7 O4 C11 119.6(3) . . ? 
C7A O4A C11A 120.3(3) . . ? 
C23 O5 C21 105.8(4) . . ? 
C23A O5A C21A 106.2(4) . . ? 
O1 C1 C2 110.2(3) . . ? 
O1 C1 C10 107.7(3) . . ? 
C2 C1 C10 115.4(3) . . ? 
O1 C1 H1 107.8 . . ? 
C2 C1 H1 107.8 . . ? 
C10 C1 H1 107.8 . . ? 
O1A C1A C2A 109.4(4) . . ? 
O1A C1A C10A 107.8(3) . . ? 
C2A C1A C10A 115.1(3) . . ? 
O1A C1A H1A 108.1 . . ? 
C2A C1A H1A 108.1 . . ? 
C10A C1A H1A 108.1 . . ? 
C3 C2 C1 116.3(3) . . ? 
C3 C2 H2A 108.2 . . ? 
C1 C2 H2A 108.2 . . ? 
C3 C2 H2B 108.2 . . ? 
C1 C2 H2B 108.2 . . ? 
H2A C2 H2B 107.4 . . ? 
C3A C2A C1A 117.2(4) . . ? 
C3A C2A H2AA 108.0 . . ? 
C1A C2A H2AA 108.0 . . ? 
C3A C2A H2AB 108.0 . . ? 
C1A C2A H2AB 108.0 . . ? 
H2AA C2A H2AB 107.2 . . ? 
O2 C3 C2 120.3(4) . . ? 
O2 C3 C4 121.5(4) . . ? 
C2 C3 C4 118.1(3) . . ? 
O2A C3A C2A 119.8(4) . . ? 
O2A C3A C4A 122.3(4) . . ? 
C2A C3A C4A 117.9(3) . . ? 
C3 C4 C28 108.3(3) . . ? 
C3 C4 C29 104.4(3) . . ? 
C28 C4 C29 109.5(3) . . ? 
C3 C4 C5 109.6(3) . . ? 
C28 C4 C5 109.5(3) . . ? 
C29 C4 C5 115.3(3) . . ? 
C3A C4A C28A 108.2(4) . . ? 
C3A C4A C29A 104.1(4) . . ? 
C28A C4A C29A 109.2(3) . . ? 
C3A C4A C5A 109.9(3) . . ? 
C28A C4A C5A 109.8(3) . . ? 
C29A C4A C5A 115.3(4) . . ? 
C10 C5 C6 113.3(3) . . ? 
C10 C5 C4 114.1(3) . . ? 
C6 C5 C4 111.0(3) . . ? 
C10 C5 H5 105.9 . . ? 
C6 C5 H5 105.9 . . ? 
C4 C5 H5 105.9 . . ? 
C10A C5A C4A 114.8(3) . . ? 
C10A C5A C6A 112.7(3) . . ? 
C4A C5A C6A 111.5(3) . . ? 
C10A C5A H5A 105.6 . . ? 
C4A C5A H5A 105.6 . . ? 
C6A C5A H5A 105.6 . . ? 
C7 C6 C5 123.6(3) . . ? 
C7 C6 H6A 106.4 . . ? 
C5 C6 H6A 106.4 . . ? 
C7 C6 H6B 106.4 . . ? 
C5 C6 H6B 106.4 . . ? 
H6A C6 H6B 106.5 . . ? 
C7A C6A C5A 123.8(3) . . ? 
C7A C6A H6AA 106.4 . . ? 
C5A C6A H6AA 106.4 . . ? 
C7A C6A H6AB 106.4 . . ? 
C5A C6A H6AB 106.4 . . ? 
H6AA C6A H6AB 106.5 . . ? 
O3 C7 O4 116.2(4) . . ? 
O3 C7 C6 120.4(4) . . ? 
O4 C7 C6 123.3(4) . . ? 
O3A C7A O4A 117.0(4) . . ? 
O3A C7A C6A 120.2(4) . . ? 
O4A C7A C6A 122.7(4) . . ? 
O1 C8 C14 114.8(3) . . ? 
O1 C8 C9 102.5(3) . . ? 
C14 C8 C9 106.6(3) . . ? 
O1 C8 C30 111.3(3) . . ? 
C14 C8 C30 105.9(3) . . ? 
C9 C8 C30 115.9(3) . . ? 
O1A C8A C14A 115.1(3) . . ? 
O1A C8A C9A 102.6(3) . . ? 
C14A C8A C9A 107.5(3) . . ? 
O1A C8A C30A 110.7(3) . . ? 
C14A C8A C30A 105.2(3) . . ? 
C9A C8A C30A 116.0(3) . . ? 
C11 C9 C8 110.6(3) . . ? 
C11 C9 C10 120.5(3) . . ? 
C8 C9 C10 106.9(3) . . ? 
C11 C9 H9 105.9 . . ? 
C8 C9 H9 105.9 . . ? 
C10 C9 H9 105.9 . . ? 
C8A C9A C11A 110.4(3) . . ? 
C8A C9A C10A 107.1(3) . . ? 
C11A C9A C10A 120.0(3) . . ? 
C8A C9A H9A 106.1 . . ? 
C11A C9A H9A 106.1 . . ? 
C10A C9A H9A 106.1 . . ? 
C19 C10 C9 108.9(3) . . ? 
C19 C10 C5 114.1(3) . . ? 
C9 C10 C5 110.0(3) . . ? 
C19 C10 C1 109.9(3) . . ? 
C9 C10 C1 101.2(3) . . ? 
C5 C10 C1 112.0(3) . . ? 
C19A C10A C5A 113.9(3) . . ? 
C19A C10A C9A 109.0(3) . . ? 
C5A C10A C9A 110.6(3) . . ? 
C19A C10A C1A 109.2(3) . . ? 
C5A C10A C1A 112.5(3) . . ? 
C9A C10A C1A 100.8(3) . . ? 
O4 C11 C9 110.2(3) . . ? 
O4 C11 C12 108.2(3) . . ? 
C9 C11 C12 109.7(3) . . ? 
O4 C11 H11 109.6 . . ? 
C9 C11 H11 109.6 . . ? 
C12 C11 H11 109.6 . . ? 
O4A C11A C9A 109.7(3) . . ? 
O4A C11A C12A 108.5(3) . . ? 
C9A C11A C12A 109.8(3) . . ? 
O4A C11A H11A 109.6 . . ? 
C9A C11A H11A 109.6 . . ? 
C12A C11A H11A 109.6 . . ? 
C13 C12 C11 115.4(3) . . ? 
C13 C12 H12C 108.4 . . ? 
C11 C12 H12C 108.4 . . ? 
C13 C12 H12D 108.4 . . ? 
C11 C12 H12D 108.4 . . ? 
H12C C12 H12D 107.5 . . ? 
C11A C12A C13A 116.3(3) . . ? 
C11A C12A H12A 108.2 . . ? 
C13A C12A H12A 108.2 . . ? 
C11A C12A H12B 108.2 . . ? 
C13A C12A H12B 108.2 . . ? 
H12A C12A H12B 107.4 . . ? 
C14 C13 C18 112.5(3) . . ? 
C14 C13 C12 112.8(3) . . ? 
C18 C13 C12 109.6(3) . . ? 
C14 C13 C17 98.9(3) . . ? 
C18 C13 C17 109.8(3) . . ? 
C12 C13 C17 113.0(3) . . ? 
C18A C13A C14A 112.1(3) . . ? 
C18A C13A C12A 109.7(3) . . ? 
C14A C13A C12A 112.4(3) . . ? 
C18A C13A C17A 109.9(3) . . ? 
C14A C13A C17A 98.9(3) . . ? 
C12A C13A C17A 113.5(3) . . ? 
C15 C14 C8 129.9(4) . . ? 
C15 C14 C13 112.0(4) . . ? 
C8 C14 C13 117.0(3) . . ? 
C15A C14A C8A 130.8(4) . . ? 
C15A C14A C13A 111.5(3) . . ? 
C8A C14A C13A 116.9(3) . . ? 
C14 C15 C16 110.5(4) . . ? 
C14 C15 H15 124.7 . . ? 
C16 C15 H15 124.7 . . ? 
C14A C15A C16A 111.1(4) . . ? 
C14A C15A H15A 124.4 . . ? 
C16A C15A H15A 124.4 . . ? 
C15 C16 C17 101.3(3) . . ? 
C15 C16 H16C 111.5 . . ? 
C17 C16 H16C 111.5 . . ? 
C15 C16 H16D 111.5 . . ? 
C17 C16 H16D 111.5 . . ? 
H16C C16 H16D 109.3 . . ? 
C15A C16A C17A 101.4(3) . . ? 
C15A C16A H16A 111.5 . . ? 
C17A C16A H16A 111.5 . . ? 
C15A C16A H16B 111.5 . . ? 
C17A C16A H16B 111.5 . . ? 
H16A C16A H16B 109.3 . . ? 
C20 C17 C16 114.6(3) . . ? 
C20 C17 C13 118.9(4) . . ? 
C16 C17 C13 103.2(3) . . ? 
C20 C17 H17 106.5 . . ? 
C16 C17 H17 106.5 . . ? 
C13 C17 H17 106.5 . . ? 
C20A C17A C13A 119.8(4) . . ? 
C20A C17A C16A 114.2(3) . . ? 
C13A C17A C16A 102.9(3) . . ? 
C20A C17A H17A 106.3 . . ? 
C13A C17A H17A 106.3 . . ? 
C16A C17A H17A 106.3 . . ? 
C13 C18 H18D 109.5 . . ? 
C13 C18 H18E 109.5 . . ? 
H18D C18 H18E 109.5 . . ? 
C13 C18 H18F 109.5 . . ? 
H18D C18 H18F 109.5 . . ? 
H18E C18 H18F 109.5 . . ? 
C13A C18A H18A 109.5 . . ? 
C13A C18A H18B 109.5 . . ? 
H18A C18A H18B 109.5 . . ? 
C13A C18A H18C 109.5 . . ? 
H18A C18A H18C 109.5 . . ? 
H18B C18A H18C 109.5 . . ? 
C10 C19 H19D 109.5 . . ? 
C10 C19 H19E 109.5 . . ? 
H19D C19 H19E 109.5 . . ? 
C10 C19 H19F 109.5 . . ? 
H19D C19 H19F 109.5 . . ? 
H19E C19 H19F 109.5 . . ? 
C10A C19A H19A 109.5 . . ? 
C10A C19A H19B 109.5 . . ? 
H19A C19A H19B 109.5 . . ? 
C10A C19A H19C 109.5 . . ? 
H19A C19A H19C 109.5 . . ? 
H19B C19A H19C 109.5 . . ? 
C21 C20 C22 105.5(4) . . ? 
C21 C20 C17 124.4(4) . . ? 
C22 C20 C17 129.8(4) . . ? 
C21A C20A C22A 105.1(4) . . ? 
C21A C20A C17A 125.0(4) . . ? 
C22A C20A C17A 129.8(4) . . ? 
C20 C21 O5 110.7(4) . . ? 
C20 C21 H21 124.7 . . ? 
O5 C21 H21 124.7 . . ? 
C20A C21A O5A 111.1(5) . . ? 
C20A C21A H21A 124.4 . . ? 
O5A C21A H21A 124.4 . . ? 
C23 C22 C20 106.9(5) . . ? 
C23 C22 H22 126.5 . . ? 
C20 C22 H22 126.5 . . ? 
C23A C22A C20A 106.7(5) . . ? 
C23A C22A H22A 126.6 . . ? 
C20A C22A H22A 126.6 . . ? 
C22 C23 O5 111.1(4) . . ? 
C22 C23 H23 124.5 . . ? 
O5 C23 H23 124.5 . . ? 
O5A C23A C22A 110.9(5) . . ? 
O5A C23A H23A 124.6 . . ? 
C22A C23A H23A 124.6 . . ? 
C4 C28 H28D 109.5 . . ? 
C4 C28 H28E 109.5 . . ? 
H28D C28 H28E 109.5 . . ? 
C4 C28 H28F 109.5 . . ? 
H28D C28 H28F 109.5 . . ? 
H28E C28 H28F 109.5 . . ? 
C4A C28A H28A 109.5 . . ? 
C4A C28A H28B 109.5 . . ? 
H28A C28A H28B 109.5 . . ? 
C4A C28A H28C 109.5 . . ? 
H28A C28A H28C 109.5 . . ? 
H28B C28A H28C 109.5 . . ? 
C4 C29 H29D 109.5 . . ? 
C4 C29 H29E 109.5 . . ? 
H29D C29 H29E 109.5 . . ? 
C4 C29 H29F 109.5 . . ? 
H29D C29 H29F 109.5 . . ? 
H29E C29 H29F 109.5 . . ? 
C4A C29A H29A 109.5 . . ? 
C4A C29A H29B 109.5 . . ? 
H29A C29A H29B 109.5 . . ? 
C4A C29A H29C 109.5 . . ? 
H29A C29A H29C 109.5 . . ? 
H29B C29A H29C 109.5 . . ? 
C8 C30 H30D 109.5 . . ? 
C8 C30 H30E 109.5 . . ? 
H30D C30 H30E 109.5 . . ? 
C8 C30 H30F 109.5 . . ? 
H30D C30 H30F 109.5 . . ? 
H30E C30 H30F 109.5 . . ? 
C8A C30A H30A 109.5 . . ? 
C8A C30A H30B 109.5 . . ? 
H30A C30A H30B 109.5 . . ? 
C8A C30A H30C 109.5 . . ? 
H30A C30A H30C 109.5 . . ? 
H30B C30A H30C 109.5 . . ? 
  
loop_ 
 _geom_torsion_atom_site_label_1 
 _geom_torsion_atom_site_label_2 
 _geom_torsion_atom_site_label_3 
 _geom_torsion_atom_site_label_4 
 _geom_torsion 
 _geom_torsion_site_symmetry_1 
 _geom_torsion_site_symmetry_2 
 _geom_torsion_site_symmetry_3 
 _geom_torsion_site_symmetry_4 
 _geom_torsion_publ_flag 
C8 O1 C1 C2 -98.1(4) . . . . ? 
C8 O1 C1 C10 28.5(4) . . . . ? 
C8A O1A C1A C2A -98.6(4) . . . . ? 
C8A O1A C1A C10A 27.2(4) . . . . ? 
O1 C1 C2 C3 162.5(3) . . . . ? 
C10 C1 C2 C3 40.3(5) . . . . ? 
O1A C1A C2A C3A 160.0(3) . . . . ? 
C10A C1A C2A C3A 38.5(5) . . . . ? 
C1 C2 C3 O2 147.9(4) . . . . ? 
C1 C2 C3 C4 -32.6(5) . . . . ? 
C1A C2A C3A O2A 152.2(4) . . . . ? 
C1A C2A C3A C4A -29.5(6) . . . . ? 
O2 C3 C4 C28 45.5(5) . . . . ? 
C2 C3 C4 C28 -134.1(4) . . . . ? 
O2 C3 C4 C29 -71.1(5) . . . . ? 
C2 C3 C4 C29 109.3(4) . . . . ? 
O2 C3 C4 C5 164.9(4) . . . . ? 
C2 C3 C4 C5 -14.7(5) . . . . ? 
O2A C3A C4A C28A 41.7(5) . . . . ? 
C2A C3A C4A C28A -136.6(4) . . . . ? 
O2A C3A C4A C29A -74.4(5) . . . . ? 
C2A C3A C4A C29A 107.4(4) . . . . ? 
O2A C3A C4A C5A 161.5(4) . . . . ? 
C2A C3A C4A C5A -16.7(5) . . . . ? 
C3 C4 C5 C10 56.5(4) . . . . ? 
C28 C4 C5 C10 175.2(3) . . . . ? 
C29 C4 C5 C10 -60.8(5) . . . . ? 
C3 C4 C5 C6 -174.0(3) . . . . ? 
C28 C4 C5 C6 -55.3(4) . . . . ? 
C29 C4 C5 C6 68.7(4) . . . . ? 
C3A C4A C5A C10A 56.6(4) . . . . ? 
C28A C4A C5A C10A 175.5(4) . . . . ? 
C29A C4A C5A C10A -60.8(5) . . . . ? 
C3A C4A C5A C6A -173.7(3) . . . . ? 
C28A C4A C5A C6A -54.8(4) . . . . ? 
C29A C4A C5A C6A 69.0(4) . . . . ? 
C10 C5 C6 C7 -24.2(5) . . . . ? 
C4 C5 C6 C7 -154.1(4) . . . . ? 
C10A C5A C6A C7A -23.9(5) . . . . ? 
C4A C5A C6A C7A -154.7(4) . . . . ? 
C11 O4 C7 O3 178.2(3) . . . . ? 
C11 O4 C7 C6 1.1(5) . . . . ? 
C5 C6 C7 O3 148.3(4) . . . . ? 
C5 C6 C7 O4 -34.7(6) . . . . ? 
C11A O4A C7A O3A 178.8(3) . . . . ? 
C11A O4A C7A C6A 1.4(5) . . . . ? 
C5A C6A C7A O3A 147.2(4) . . . . ? 
C5A C6A C7A O4A -35.5(6) . . . . ? 
C1 O1 C8 C14 -153.3(4) . . . . ? 
C1 O1 C8 C9 -38.1(4) . . . . ? 
C1 O1 C8 C30 86.4(4) . . . . ? 
C1A O1A C8A C14A -154.2(4) . . . . ? 
C1A O1A C8A C9A -37.8(4) . . . . ? 
C1A O1A C8A C30A 86.6(4) . . . . ? 
O1 C8 C9 C11 166.7(3) . . . . ? 
C14 C8 C9 C11 -72.3(4) . . . . ? 
C30 C8 C9 C11 45.3(4) . . . . ? 
O1 C8 C9 C10 33.7(4) . . . . ? 
C14 C8 C9 C10 154.7(3) . . . . ? 
C30 C8 C9 C10 -87.7(4) . . . . ? 
O1A C8A C9A C11A 166.8(3) . . . . ? 
C14A C8A C9A C11A -71.4(4) . . . . ? 
C30A C8A C9A C11A 46.0(4) . . . . ? 
O1A C8A C9A C10A 34.5(4) . . . . ? 
C14A C8A C9A C10A 156.2(3) . . . . ? 
C30A C8A C9A C10A -86.3(4) . . . . ? 
C11 C9 C10 C19 100.3(4) . . . . ? 
C8 C9 C10 C19 -132.3(3) . . . . ? 
C11 C9 C10 C5 -25.4(5) . . . . ? 
C8 C9 C10 C5 102.0(4) . . . . ? 
C11 C9 C10 C1 -143.9(4) . . . . ? 
C8 C9 C10 C1 -16.6(4) . . . . ? 
C6 C5 C10 C19 -51.6(4) . . . . ? 
C4 C5 C10 C19 76.7(4) . . . . ? 
C6 C5 C10 C9 71.1(4) . . . . ? 
C4 C5 C10 C9 -160.6(3) . . . . ? 
C6 C5 C10 C1 -177.3(3) . . . . ? 
C4 C5 C10 C1 -49.0(4) . . . . ? 
O1 C1 C10 C19 108.7(3) . . . . ? 
C2 C1 C10 C19 -127.8(3) . . . . ? 
O1 C1 C10 C9 -6.2(4) . . . . ? 
C2 C1 C10 C9 117.2(3) . . . . ? 
O1 C1 C10 C5 -123.3(3) . . . . ? 
C2 C1 C10 C5 0.2(4) . . . . ? 
C4A C5A C10A C19A 77.2(4) . . . . ? 
C6A C5A C10A C19A -52.0(4) . . . . ? 
C4A C5A C10A C9A -159.6(3) . . . . ? 
C6A C5A C10A C9A 71.2(4) . . . . ? 
C4A C5A C10A C1A -47.8(4) . . . . ? 
C6A C5A C10A C1A -176.9(3) . . . . ? 
C8A C9A C10A C19A -132.8(3) . . . . ? 
C11A C9A C10A C19A 100.3(4) . . . . ? 
C8A C9A C10A C5A 101.3(4) . . . . ? 
C11A C9A C10A C5A -25.6(5) . . . . ? 
C8A C9A C10A C1A -17.9(4) . . . . ? 
C11A C9A C10A C1A -144.8(4) . . . . ? 
O1A C1A C10A C19A 110.0(4) . . . . ? 
C2A C1A C10A C19A -127.7(4) . . . . ? 
O1A C1A C10A C5A -122.6(3) . . . . ? 
C2A C1A C10A C5A -0.2(5) . . . . ? 
O1A C1A C10A C9A -4.8(4) . . . . ? 
C2A C1A C10A C9A 117.6(4) . . . . ? 
C7 O4 C11 C9 71.3(4) . . . . ? 
C7 O4 C11 C12 -168.7(3) . . . . ? 
C8 C9 C11 O4 172.8(3) . . . . ? 
C10 C9 C11 O4 -61.6(4) . . . . ? 
C8 C9 C11 C12 53.8(4) . . . . ? 
C10 C9 C11 C12 179.4(3) . . . . ? 
C7A O4A C11A C9A 71.2(4) . . . . ? 
C7A O4A C11A C12A -168.9(3) . . . . ? 
C8A C9A C11A O4A 172.9(3) . . . . ? 
C10A C9A C11A O4A -61.7(5) . . . . ? 
C8A C9A C11A C12A 53.8(4) . . . . ? 
C10A C9A C11A C12A 179.1(3) . . . . ? 
O4 C11 C12 C13 -115.9(4) . . . . ? 
C9 C11 C12 C13 4.3(5) . . . . ? 
O4A C11A C12A C13A -116.3(4) . . . . ? 
C9A C11A C12A C13A 3.5(5) . . . . ? 
C11 C12 C13 C14 -43.1(5) . . . . ? 
C11 C12 C13 C18 83.0(4) . . . . ? 
C11 C12 C13 C17 -154.2(3) . . . . ? 
C11A C12A C13A C18A 83.1(4) . . . . ? 
C11A C12A C13A C14A -42.2(5) . . . . ? 
C11A C12A C13A C17A -153.4(3) . . . . ? 
O1 C8 C14 C15 -50.7(6) . . . . ? 
C9 C8 C14 C15 -163.4(4) . . . . ? 
C30 C8 C14 C15 72.6(5) . . . . ? 
O1 C8 C14 C13 142.1(3) . . . . ? 
C9 C8 C14 C13 29.4(4) . . . . ? 
C30 C8 C14 C13 -94.6(4) . . . . ? 
C18 C13 C14 C15 90.6(4) . . . . ? 
C12 C13 C14 C15 -144.8(4) . . . . ? 
C17 C13 C14 C15 -25.2(4) . . . . ? 
C18 C13 C14 C8 -99.9(4) . . . . ? 
C12 C13 C14 C8 24.7(5) . . . . ? 
C17 C13 C14 C8 144.3(3) . . . . ? 
O1A C8A C14A C15A -49.4(7) . . . . ? 
C9A C8A C14A C15A -162.9(5) . . . . ? 
C30A C8A C14A C15A 72.8(6) . . . . ? 
O1A C8A C14A C13A 142.2(4) . . . . ? 
C9A C8A C14A C13A 28.6(5) . . . . ? 
C30A C8A C14A C13A -95.6(4) . . . . ? 
C18A C13A C14A C15A 90.1(4) . . . . ? 
C12A C13A C14A C15A -145.8(4) . . . . ? 
C17A C13A C14A C15A -25.8(4) . . . . ? 
C18A C13A C14A C8A -99.3(4) . . . . ? 
C12A C13A C14A C8A 24.8(5) . . . . ? 
C17A C13A C14A C8A 144.9(4) . . . . ? 
C8 C14 C15 C16 -163.9(4) . . . . ? 
C13 C14 C15 C16 3.8(5) . . . . ? 
C8A C14A C15A C16A -164.8(4) . . . . ? 
C13A C14A C15A C16A 4.2(5) . . . . ? 
C14 C15 C16 C17 19.8(5) . . . . ? 
C14A C15A C16A C17A 19.4(5) . . . . ? 
C15 C16 C17 C20 -165.1(4) . . . . ? 
C15 C16 C17 C13 -34.4(4) . . . . ? 
C14 C13 C17 C20 163.7(3) . . . . ? 
C18 C13 C17 C20 45.8(5) . . . . ? 
C12 C13 C17 C20 -76.9(4) . . . . ? 
C14 C13 C17 C16 35.6(4) . . . . ? 
C18 C13 C17 C16 -82.3(4) . . . . ? 
C12 C13 C17 C16 155.1(4) . . . . ? 
C18A C13A C17A C20A 46.2(5) . . . . ? 
C14A C13A C17A C20A 163.7(4) . . . . ? 
C12A C13A C17A C20A -77.1(5) . . . . ? 
C18A C13A C17A C16A -81.9(4) . . . . ? 
C14A C13A C17A C16A 35.6(4) . . . . ? 
C12A C13A C17A C16A 154.8(4) . . . . ? 
C15A C16A C17A C20A -165.9(4) . . . . ? 
C15A C16A C17A C13A -34.4(4) . . . . ? 
C16 C17 C20 C21 -121.8(5) . . . . ? 
C13 C17 C20 C21 115.7(5) . . . . ? 
C16 C17 C20 C22 51.6(6) . . . . ? 
C13 C17 C20 C22 -71.0(5) . . . . ? 
C13A C17A C20A C21A 116.4(5) . . . . ? 
C16A C17A C20A C21A -120.9(5) . . . . ? 
C13A C17A C20A C22A -69.4(6) . . . . ? 
C16A C17A C20A C22A 53.3(6) . . . . ? 
C22 C20 C21 O5 0.0(5) . . . . ? 
C17 C20 C21 O5 174.7(4) . . . . ? 
C23 O5 C21 C20 -0.2(5) . . . . ? 
C22A C20A C21A O5A -0.4(5) . . . . ? 
C17A C20A C21A O5A 174.9(4) . . . . ? 
C23A O5A C21A C20A -0.1(5) . . . . ? 
C21 C20 C22 C23 0.2(5) . . . . ? 
C17 C20 C22 C23 -174.1(5) . . . . ? 
C21A C20A C22A C23A 0.8(5) . . . . ? 
C17A C20A C22A C23A -174.3(4) . . . . ? 
C20 C22 C23 O5 -0.4(6) . . . . ? 
C21 O5 C23 C22 0.4(6) . . . . ? 
C21A O5A C23A C22A 0.6(5) . . . . ? 
C20A C22A C23A O5A -0.9(6) . . . . ? 
  
loop_ 
 _geom_hbond_atom_site_label_D 
 _geom_hbond_atom_site_label_H 
 _geom_hbond_atom_site_label_A 
 _geom_hbond_distance_DH 
 _geom_hbond_distance_HA 
 _geom_hbond_distance_DA 
 _geom_hbond_angle_DHA 
 _geom_hbond_site_symmetry_A 
C6 H6B O3A  0.99 2.62 3.392(5) 134.9 1_655 
C6A H6AB O3  0.99 2.62 3.397(5) 135.7 . 
C11 H11 O3A  1.00 2.53 3.418(5) 147.3 1_655 
C11A H11A O3  1.00 2.56 3.428(5) 145.2 . 
C12 H12D O5A  0.99 2.65 3.609(5) 163.1 1_656 
C12A H12A O5  0.99 2.66 3.617(6) 163.4 1_554 
  
_refine_diff_density_max    0.583 
_refine_diff_density_min   -0.409 
_refine_diff_density_rms    0.107 
  
_shelxl_version_number 2013-4 
  
_shelx_res_file 
; 
TITL cu_dm14221_0m in P1 
CELL 1.54178 7.2748 12.323 13.1676 114.212 90.277 91.395 
ZERR 2 0.0002 0.0003 0.0003 0.001 0.001 0.001 
LATT -1 
  
SFAC C H O 
UNIT 52 64 10 
EQIV $1 1+X,+Y,+Z 
EQIV $2 1+X,+Y,1+Z 
EQIV $3 +X,+Y,-1+Z 
  
L.S. 4 
PLAN  -5 0 0 
SIZE 0.06 0.1 0.3 
TEMP -133 
HTAB  C6 O3A_$1 
HTAB  C6A O3 
HTAB  C11 O3A_$1 
HTAB  C11A O3 
HTAB  C12 O5A_$2 
HTAB  C12A O5_$3 
wpdb -1 
conf 
htab 
BOND $H 
fmap 2 
acta 
REM Instructions for potential hydrogen bonds 
REM <HKL>D:/data/guest/dm14221/work/cu_dm14221_0m.hkl</HKL> 
  
WGHT    0.140000    0.117400 
FVAR       1.02618 
O1    3    1.054521    1.211841    0.531129    11.00000    0.04043    0.02722 = 
         0.01737    0.00859   -0.00400   -0.00509 
O1A   3    0.507565    0.364414   -0.055228    11.00000    0.04318    0.02939 = 
         0.01721    0.00945    0.00323    0.01315 
O2    3    1.264339    1.136500    0.163837    11.00000    0.04595    0.04249 = 
         0.02802    0.01260    0.00584   -0.00717 
O2A   3    0.741819    0.446493    0.310854    11.00000    0.05729    0.04685 = 
         0.03099    0.01352   -0.00876    0.01435 
O3    3    0.394673    0.896309    0.242125    11.00000    0.03519    0.03432 = 
         0.02770    0.01187   -0.00943   -0.00320 
O3A   3   -0.111977    0.687216    0.234367    11.00000    0.03771    0.03821 = 
         0.03183    0.01434    0.00837    0.01056 
O4    3    0.567416    0.925354    0.387389    11.00000    0.03172    0.02748 = 
         0.02067    0.01080   -0.00327   -0.00177 
O4A   3    0.056587    0.657587    0.089727    11.00000    0.03371    0.02853 = 
         0.01932    0.00870    0.00124    0.00727 
O5    3    0.582603    0.838983    0.885656    11.00000    0.05859    0.05798 = 
         0.03881    0.02809   -0.00048   -0.01796 
O5A   3    0.088637    0.746386   -0.409893    11.00000    0.06145    0.04979 = 
         0.04091    0.02794   -0.00033    0.01883 
C1    1    1.012799    1.203162    0.420307    11.00000    0.03673    0.02239 = 
         0.02075    0.00982   -0.00123   -0.00038 
AFIX  13 
H1    2    0.978211    1.283897    0.427167    11.00000   -1.20000 
AFIX   0 
  
C1A   1    0.466995    0.373398    0.056168    11.00000    0.04385    0.02423 = 
         0.01818    0.00838   -0.00027    0.00893 
AFIX  13 
H1A   2    0.421599    0.293483    0.049554    11.00000   -1.20000 
AFIX   0 
  
C2    1    1.183388    1.167243    0.347771    11.00000    0.03126    0.02697 = 
         0.02257    0.01141   -0.00408   -0.00350 
AFIX  23 
H2A   2    1.268005    1.237599    0.370176    11.00000   -1.20000 
H2B   2    1.246833    1.105928    0.364148    11.00000   -1.20000 
AFIX   0 
  
C2A   1    0.643990    0.406152    0.127089    11.00000    0.03856    0.03716 = 
         0.02096    0.01278   -0.00172    0.01133 
AFIX  23 
H2AA  2    0.716573    0.333372    0.105823    11.00000   -1.20000 
H2AB  2    0.716849    0.463368    0.107279    11.00000   -1.20000 
AFIX   0 
  
C3    1    1.150544    1.119255    0.222839    11.00000    0.03264    0.02730 = 
         0.02213    0.01196    0.00213    0.00209 
C3A   1    0.623467    0.459745    0.253094    11.00000    0.04034    0.02751 = 
         0.02278    0.01360   -0.00425    0.00393 
C4    1    0.971967    1.048617    0.174660    11.00000    0.03502    0.02780 = 
         0.01629    0.01075    0.00074    0.00501 
C4A   1    0.452935    0.532167    0.301661    11.00000    0.03764    0.02577 = 
         0.01699    0.00981   -0.00274    0.00056 
C5    1    0.879337    1.011982    0.263480    11.00000    0.02775    0.02143 = 
         0.01921    0.00724   -0.00048    0.00314 
AFIX  13 
H5    2    0.970808    0.962836    0.281353    11.00000   -1.20000 
AFIX   0 
  
C5A   1    0.361036    0.567718    0.213265    11.00000    0.03023    0.02101 = 
         0.01755    0.00827   -0.00185   -0.00064 
AFIX  13 
H5A   2    0.456804    0.615436    0.193970    11.00000   -1.20000 
AFIX   0 
  
C6    1    0.708091    0.928548    0.213144    11.00000    0.03305    0.02724 = 
         0.01842    0.00719   -0.00244    0.00113 
AFIX  23 
H6A   2    0.655847    0.951556    0.155493    11.00000   -1.20000 
H6B   2    0.754864    0.847327    0.173403    11.00000   -1.20000 
AFIX   0 
  
C6A   1    0.199512    0.653363    0.263418    11.00000    0.03859    0.02542 = 
         0.01633    0.00640    0.00073    0.00290 
AFIX  23 
H6AA  2    0.145685    0.631813    0.321799    11.00000   -1.20000 
H6AB  2    0.255861    0.734090    0.302288    11.00000   -1.20000 
AFIX   0 
  
C7    1    0.548073    0.917612    0.281684    11.00000    0.03253    0.02041 = 
         0.02437    0.00871   -0.00604   -0.00227 
C7A   1    0.037968    0.665531    0.194524    11.00000    0.03419    0.02453 = 
         0.02263    0.01110    0.00510    0.00410 
C8    1    0.992418    1.102283    0.535863    11.00000    0.02906    0.02356 = 
         0.01814    0.00765   -0.00124   -0.00320 
C8A   1    0.457965    0.474959   -0.059684    11.00000    0.03252    0.02842 = 
         0.01822    0.01079    0.00002    0.00654 
C9    1    0.813948    1.073589    0.467817    11.00000    0.02967    0.02317 = 
         0.01675    0.00802    0.00078    0.00363 
AFIX  13 
H9    2    0.719453    1.125466    0.518265    11.00000   -1.20000 
AFIX   0 
  
C9A   1    0.284612    0.506015    0.008603    11.00000    0.03000    0.02168 = 
         0.01481    0.00703   -0.00219    0.00345 
AFIX  13 
H9A   2    0.183374    0.455181   -0.041124    11.00000   -1.20000 
AFIX   0 
  
C10   1    0.840739    1.118008    0.375036    11.00000    0.03362    0.02163 = 
         0.01546    0.00869    0.00106    0.00427 
C10A  1    0.307738    0.462865    0.103038    11.00000    0.03264    0.02117 = 
         0.01691    0.00867   -0.00264    0.00101 
C11   1    0.749247    0.947287    0.439892    11.00000    0.02546    0.02036 = 
         0.02204    0.00792   -0.00187    0.00017 
AFIX  13 
H11   2    0.837921    0.890898    0.388240    11.00000   -1.20000 
AFIX   0 
  
C11A  1    0.235126    0.633829    0.036382    11.00000    0.02848    0.02473 = 
         0.01800    0.00946    0.00038    0.00384 
AFIX  13 
H11A  2    0.330858    0.689072    0.087689    11.00000   -1.20000 
AFIX   0 
  
C12   1    0.736010    0.926196    0.549171    11.00000    0.03519    0.02068 = 
         0.01796    0.00801   -0.00059   -0.00087 
AFIX  23 
H12C  2    0.610783    0.894844    0.552838    11.00000   -1.20000 
H12D  2    0.823629    0.864140    0.544455    11.00000   -1.20000 
AFIX   0 
  
C12A  1    0.223268    0.654451   -0.071866    11.00000    0.03537    0.02359 = 
         0.01586    0.00798   -0.00042    0.00450 
AFIX  23 
H12A  2    0.317038    0.716099   -0.066864    11.00000   -1.20000 
H12B  2    0.101247    0.686762   -0.075290    11.00000   -1.20000 
AFIX   0 
  
C13   1    0.776320    1.038030    0.659283    11.00000    0.03401    0.02293 = 
         0.01474    0.00688   -0.00021    0.00237 
C13A  1    0.250867    0.543824   -0.182473    11.00000    0.03472    0.02448 = 
         0.01868    0.00858   -0.00160    0.00338 
C14   1    0.942738    1.112568    0.651037    11.00000    0.03385    0.02548 = 
         0.01659    0.00658   -0.00089    0.00040 
C14A  1    0.409833    0.466565   -0.174074    11.00000    0.03654    0.02303 = 
         0.01930    0.00815   -0.00198    0.00421 
C15   1    1.037738    1.160854    0.746044    11.00000    0.03947    0.03504 = 
         0.01952    0.01214   -0.00517   -0.00694 
AFIX  43 
H15   2    1.141155    1.213660    0.758980    11.00000   -1.20000 
AFIX   0 
  
C15A  1    0.497490    0.417336   -0.269474    11.00000    0.04088    0.03039 = 
         0.02199    0.01138    0.00388    0.01113 
AFIX  43 
H15A  2    0.594058    0.362862   -0.282793    11.00000   -1.20000 
AFIX   0 
  
C16   1    0.957861    1.119812    0.831564    11.00000    0.04254    0.03573 = 
         0.02015    0.01130   -0.00574   -0.00514 
AFIX  23 
H16C  2    0.876833    1.180062    0.883989    11.00000   -1.20000 
H16D  2    1.055912    1.101578    0.874097    11.00000   -1.20000 
AFIX   0 
  
C16A  1    0.424033    0.459023   -0.354013    11.00000    0.04415    0.03409 = 
         0.01931    0.00895    0.00352    0.01042 
AFIX  23 
H16A  2    0.336175    0.399825   -0.406721    11.00000   -1.20000 
H16B  2    0.524502    0.476104   -0.396239    11.00000   -1.20000 
AFIX   0 
  
C17   1    0.847727    1.006295    0.755817    11.00000    0.03561    0.02935 = 
         0.01688    0.00978    0.00019    0.00360 
AFIX  13 
H17   2    0.939468    0.942638    0.722279    11.00000   -1.20000 
AFIX   0 
  
C17A  1    0.326009    0.575051   -0.277746    11.00000    0.03765    0.02928 = 
         0.01757    0.01027    0.00050    0.00554 
AFIX  13 
H17A  2    0.425390    0.637290   -0.243627    11.00000   -1.20000 
AFIX   0 
  
C18   1    0.601982    1.111302    0.695646    11.00000    0.03599    0.02877 = 
         0.02720    0.01166    0.00334    0.00613 
AFIX 137 
H18D  2    0.506668    1.064876    0.713856    11.00000   -1.50000 
H18E  2    0.557716    1.130814    0.634898    11.00000   -1.50000 
H18F  2    0.630348    1.184959    0.761381    11.00000   -1.50000 
AFIX   0 
  
C18A  1    0.067874    0.471495   -0.219759    11.00000    0.03718    0.03068 = 
         0.02580    0.00898   -0.00379    0.00057 
AFIX 137 
H18A  2    0.087193    0.399699   -0.287663    11.00000   -1.50000 
H18B  2   -0.024182    0.520144   -0.234595    11.00000   -1.50000 
H18C  2    0.024481    0.448741   -0.160681    11.00000   -1.50000 
AFIX   0 
  
C19   1    0.673319    1.189505    0.371177    11.00000    0.03664    0.02518 = 
         0.02685    0.01236    0.00084    0.00777 
AFIX 137 
H19D  2    0.652016    1.251149    0.445735    11.00000   -1.50000 
H19E  2    0.564744    1.136088    0.345890    11.00000   -1.50000 
H19F  2    0.696182    1.226977    0.319440    11.00000   -1.50000 
AFIX   0 
  
C19A  1    0.132334    0.394422    0.109092    11.00000    0.04060    0.02695 = 
         0.02122    0.00962   -0.00317   -0.00409 
AFIX 137 
H19A  2    0.153469    0.355273    0.159419    11.00000   -1.50000 
H19B  2    0.099712    0.334291    0.034608    11.00000   -1.50000 
H19C  2    0.031682    0.449946    0.137120    11.00000   -1.50000 
AFIX   0 
  
C20   1    0.712696    0.960634    0.815776    11.00000    0.03794    0.03116 = 
         0.01587    0.00759   -0.00307   -0.00473 
C20A  1    0.199545    0.622548   -0.338770    11.00000    0.04428    0.02956 = 
         0.01584    0.00778    0.00052    0.01164 
C21   1    0.714128    0.850864    0.814668    11.00000    0.04598    0.03916 = 
         0.02927    0.01484   -0.00091   -0.00555 
AFIX  43 
H21   2    0.794215    0.789941    0.771234    11.00000   -1.20000 
AFIX   0 
  
C21A  1    0.215645    0.732798   -0.339085    11.00000    0.05448    0.03784 = 
         0.02619    0.01543    0.00046    0.01111 
AFIX  43 
H21A  2    0.303429    0.792450   -0.295873    11.00000   -1.20000 
AFIX   0 
  
C22   1    0.571176    1.022055    0.892457    11.00000    0.04592    0.04387 = 
         0.02171    0.00825    0.00444   -0.00148 
AFIX  43 
H22   2    0.535300    1.101612    0.911782    11.00000   -1.20000 
AFIX   0 
  
C22A  1    0.050485    0.564146   -0.414563    11.00000    0.05171    0.04059 = 
         0.02097    0.00684   -0.00555    0.00839 
AFIX  43 
H22A  2    0.002595    0.485849   -0.432864    11.00000   -1.20000 
AFIX   0 
  
C23   1    0.499756    0.945565    0.931346    11.00000    0.04227    0.06236 = 
         0.02524    0.01256    0.00235   -0.01377 
AFIX  43 
H23   2    0.403804    0.963526    0.983951    11.00000   -1.20000 
AFIX   0 
  
C23A  1   -0.009078    0.642318   -0.455164    11.00000    0.04838    0.05375 = 
         0.02869    0.01276   -0.00460    0.02025 
AFIX  43 
H23A  2   -0.106311    0.626126   -0.508235    11.00000   -1.20000 
AFIX   0 
  
C28   1    1.018675    0.936429    0.071808    11.00000    0.04333    0.02956 = 
         0.01869    0.00676    0.00400    0.00064 
AFIX 137 
H28D  2    1.086984    0.959164    0.019230    11.00000   -1.50000 
H28E  2    0.904784    0.893325    0.035984    11.00000   -1.50000 
H28F  2    1.094102    0.885116    0.094494    11.00000   -1.50000 
AFIX   0 
  
C28A  1    0.513307    0.644296    0.403501    11.00000    0.04314    0.03468 = 
         0.02176    0.00794   -0.00583   -0.00077 
AFIX 137 
H28A  2    0.404904    0.689624    0.438546    11.00000   -1.50000 
H28B  2    0.595869    0.693521    0.380142    11.00000   -1.50000 
H28C  2    0.577780    0.621496    0.456983    11.00000   -1.50000 
AFIX   0 
  
C29   1    0.859161    1.131447    0.138582    11.00000    0.04335    0.03832 = 
         0.02698    0.02158    0.00201    0.00841 
AFIX 137 
H29D  2    0.865795    1.212403    0.197342    11.00000   -1.50000 
H29E  2    0.730655    1.102836    0.125705    11.00000   -1.50000 
H29F  2    0.909312    1.131766    0.069760    11.00000   -1.50000 
AFIX   0 
  
C29A  1    0.333777    0.450941    0.340155    11.00000    0.05800    0.03555 = 
         0.02573    0.01876   -0.00614   -0.00534 
AFIX 137 
H29A  2    0.210411    0.483062    0.358011    11.00000   -1.50000 
H29B  2    0.390435    0.447628    0.406460    11.00000   -1.50000 
H29C  2    0.324925    0.370627    0.280405    11.00000   -1.50000 
AFIX   0 
  
C30   1    1.141188    1.006649    0.493669    11.00000    0.03143    0.03200 = 
         0.02251    0.01251    0.00027    0.00327 
AFIX 137 
H30D  2    1.148020    0.976105    0.412398    11.00000   -1.50000 
H30E  2    1.108990    0.941153    0.514866    11.00000   -1.50000 
H30F  2    1.260670    1.042189    0.527050    11.00000   -1.50000 
AFIX   0 
  
C30A  1    0.618933    0.567422   -0.017660    11.00000    0.03333    0.03487 = 
         0.02412    0.01284   -0.00001    0.00501 
AFIX 137 
H30A  2    0.635587    0.593244    0.062867    11.00000   -1.50000 
H30B  2    0.591419    0.636280   -0.033758    11.00000   -1.50000 
H30C  2    0.731889    0.531387   -0.055435    11.00000   -1.50000 
AFIX   0 
HKLF 4 
  
REM  cu_dm14221_0m in P1 
REM R1 =  0.0628 for    5188 Fo > 4sig(Fo)  and  0.0648 for all    5362 data 
REM    569 parameters refined using      3 restraints 
  
END 
  
WGHT      0.1365      0.0911 
  
REM Instructions for potential hydrogen bonds 
HTAB C6 O3A_$1 
HTAB C6A O3 
HTAB C11 O3A_$1 
HTAB C11A O3 
HTAB C12 O5A_$2 
HTAB C12A O5_$3 
  
REM Highest difference peak  0.583,  deepest hole -0.409,  1-sigma level  0.107 
Q1    1  -0.2562  0.6778  0.2272  11.00000  0.05    0.58 
Q2    1   0.8180  0.4110  0.1226  11.00000  0.05    0.54 
Q3    1   0.5229  1.1770  0.3737  11.00000  0.05    0.52 
Q4    1   0.6046  0.4442  0.3184  11.00000  0.05    0.50 
Q5    1   1.2020  1.2249  0.5332  11.00000  0.05    0.49 
; 
_shelx_res_checksum   68759 
  
_shelx_hkl_file 
; 
  -1   0   0 90.4113  7.6832   9 
  -1   0   0 103.847   7.238   3 
  -2   0   0 1006.86   66.46   3 
  -2   0   0 849.717  70.330   9 
  -2   0   0 904.362  54.547   5 
  -3   0   0 28.5927  2.2500   5 
  -3   0   0 28.3026  2.8987   9 
  -3   0   0 28.9448  2.5301   3 
  -4   0   0 313.128  24.601   9 
  -4   0   0 303.051  22.860   3 
  -4   0   0 314.730  19.015   5 
   4  -1   0 39.3173  3.8326   9 
  -4   1   0 41.8919  3.6748   3 
   3  -1   0 200.403  16.714   9 
  -3   1   0 197.070  12.970   5 
  -3   1   0 227.996  15.940   3 
  -3   1   0 231.853  16.935   9 
   2  -1   0 163.090  13.660   9 
  -2   1   0 185.716  13.038   3 
  -2   1   0 179.747  13.786   9 
   1  -1   0 7606.91  574.21   9 
  -1   1   0 7263.37  582.68  12 
   0  -1   0 18.9017  2.6851   9 
  -1  -1   0 6348.23  482.87   9 
  -2  -1   0 262.124  15.630   5 
  -2  -1   0 254.758  20.151   9 
  -3  -1   0 242.953  19.829   9 
  -3  -1   0 249.140  15.370   5 
  -3  -1   0 258.093  18.342   3 
  -4  -1   0 25.2253  2.3319   5 
  -4  -1   0 23.8286  3.0209   9 
  -5  -1   0 462.330  26.667   5 
   5   1   0 405.843  26.252   5 
  -5   2   0 708.969  51.971   3 
   4  -2   0 37.7501  3.5662   9 
  -4   2   0 37.3556  3.5380   3 
   3  -2   0 958.765  74.429   9 
  -3   2   0 987.180  70.589   3 
   2  -2   0 415.378  30.995   9 
  -2   2   0 380.828  31.517  12 
  -2   2   0 414.317  29.477   3 
   1  -2   0 8498.39  676.77   9 
  -1   2   0 8973.08  629.74   3 
   0   2   0 9999.99  727.95   3 
  -1  -2   0 7861.71  475.21   5 
  -1  -2   0 8267.08  613.47   9 
  -2  -2   0 631.126  46.610   9 
   2   2   0 580.843  43.509   3 
  -3  -2   0 1072.79   64.45   5 
  -3  -2   0 1092.80   83.23   9 
  -4  -2   0 20.6388  2.3324   5 
  -4  -2   0 20.1828  3.1251   9 
  -5  -2   0 275.437  16.435   5 
  -5  -2   0 261.447  21.310   9 
   5   2   0 236.968  15.973   5 
  -7   3   0 63.7109  4.0368   4 
  -7   3   0 56.9494  4.3871   7 
  -6   3   0 190.319  12.272   7 
  -6   3   0 190.418  11.165   4 
  -5   3   0 2.44932 1.15721   3 
   4  -3   0 41.9330  3.7697   9 
  -4   3   0 37.4139  3.7860   3 
   3  -3   0 1294.83   97.81   9 
  -3   3   0 1266.84   92.78   3 
   2  -3   0 66.3154  5.5957   9 
  -2   3   0 71.9762  5.8117  12 
  -2   3   0 67.5626  5.5168   3 
   1  -3   0 843.878  64.207   9 
  -1   3   0 839.006  60.850   3 
   0  -3   0 363.444  21.054   5 
   0  -3   0 399.489  27.273   9 
   0   3   0 299.143  25.649   3 
  -1  -3   0 387.949  33.227   9 
   1   3   0 468.243  31.070   3 
  -2  -3   0 383.973  29.233   9 
  -2  -3   0 363.077  22.523   5 
  -3  -3   0 750.841  44.751   5 
  -3  -3   0 742.461  57.874   9 
  -4  -3   0 147.288  12.506   9 
  -4  -3   0 140.710   9.489   5 
  -5  -3   0 86.5844  6.0338   5 
  -5  -3   0 76.4363  7.8770   9 
   5   3   0 74.9448  5.5820   5 
  -6  -3   0 477.131  40.270  15 
  -6  -3   0 455.312  31.023   2 
  -7  -3   0 11.8336  2.8218  15 
  -7   4   0 26.6756  2.2229   4 
  -7   4   0 26.6619  2.4780   7 
  -6   4   0 499.717  31.217   7 
  -6   4   0 523.591  28.458   4 
  -5   4   0 129.531  10.613   3 
  -4   4   0 151.190  11.982   3 
   3  -4   0 607.711  45.817   9 
  -3   4   0 581.838  43.652   3 
   2  -4   0 842.720  66.314   9 
  -2   4   0 909.821  67.602  12 
  -2   4   0 848.803  62.970   3 
  -1   4   0 14.2646  1.5868   3 
   0   4   0 6615.50  507.97   3 
   0   4   0 7519.14  416.62   5 
  -1  -4   0 39.3339  2.7762   5 
  -1  -4   0 38.7362  3.7274   9 
  -2  -4   0 280.476  17.341   5 
  -2  -4   0 287.084  22.614   9 
  -3  -4   0 500.021  40.237   9 
  -3  -4   0 522.993  31.024   5 
  -4  -4   0 88.0984  8.3940   9 
  -4  -4   0 87.6231  6.2822   5 
   5   4   0 78.5414  5.6928   5 
  -6  -4   0 100.595  10.592  15 
  -6  -4   0 97.1498  7.6767   2 
  -7  -4   0 76.1231  6.1693   2 
  -7  -4   0 84.1008  8.4397  15 
  -8   5   0 41.4099  2.5816   4 
  -8   5   0 38.8436  2.8196   7 
  -7   5   0 66.8594  4.2784   4 
  -7   5   0 63.2806  4.6946   7 
  -6   5   0 104.855   6.459   4 
  -6   5   0 99.8300  7.7754   6 
  -6   5   0 102.419   7.169   7 
  -5   5   0 56.5788  3.9081   4 
  -5   5   0 53.2295  4.3519   7 
  -4   5   0 7.08823 1.64187   3 
   3  -5   0 5.02755 1.11999   9 
  -3   5   0 5.32437 1.33955   3 
   2  -5   0 335.822  29.064   9 
  -2   5   0 411.911  29.842  12 
  -2   5   0 381.922  27.836   3 
  -1   5   0 6.70332 1.18654   3 
   0   5   0 199.477  14.827   3 
  -1  -5   0 25.7885  2.9332   9 
  -1  -5   0 26.1929  2.0956   5 
  -2  -5   0 329.725  20.526   5 
  -2  -5   0 343.532  26.873   9 
  -3  -5   0 65.7593  4.8058   5 
  -3  -5   0 63.9022  6.4986   9 
  -4  -5   0 25.9073  4.1153   9 
  -4  -5   0 21.2155  2.6453   5 
   4   5   0 20.7650  2.3885   5 
  -5  -5   0 147.344   9.803   2 
  -5  -5   0 123.317  13.134  15 
  -5  -5   0 113.508  15.952   1 
  -6  -5   0 38.2656  6.1639  15 
  -6  -5   0 45.3087  4.1256   2 
  -6  -5   0 43.0234  3.4172  11 
  -7  -5   0 34.7065  3.2006   2 
  -7  -5   0 31.1930  4.7267  15 
  -7   6   0 75.9999  4.6180   4 
  -7   6   0 68.6681  5.0373   7 
  -6   6   0 1.35482 0.94450   7 
  -6   6   0 1.85476 1.19465   6 
  -6   6   0 2.01035 0.85736   4 
  -5   6   0 206.234  11.832   4 
  -5   6   0 197.458  14.230   6 
  -5   6   0 203.954  13.143   7 
  -4   6   0 55.3739  5.3192   3 
   3  -6   0 51.5956  4.9369   9 
  -3   6   0 57.7041  5.0909   3 
   2  -6   0 75.8096  6.9916   9 
  -2   6   0 82.0493  6.8940   3 
  -2   6   0 91.5503  7.4119  12 
   1  -6   0 253.525  18.675   9 
  -1   6   0 216.745  17.583   3 
   0  -6   0 521.310  40.545   9 
  -1  -6   0 179.462  17.635   9 
   1   6   0 253.941  13.457   5 
  -2  -6   0 46.1254  4.8898   9 
   2   6   0 42.7795  3.2625   5 
  -3  -6   0 201.322  17.186   9 
   3   6   0 200.183  12.694   5 
   4   6   0 83.4608  5.9787   5 
  -5  -6   0 94.3029  7.4166   2 
  -5  -6   0 85.7523 10.2271  15 
  -5  -6   0 104.788  13.269   1 
  -6  -6   0 22.8011  2.8094   2 
  -6  -6   0 20.3613  4.1646  15 
  -7  -6   0 13.2960  1.8711   2 
  -7  -6   0 14.2214  2.8725  15 
  -7   7   0 12.9332  1.3702   4 
  -7   7   0 12.1514  1.6695   6 
  -7   7   0 12.4394  1.5096   7 
  -6   7   0 5.56786 1.52324   6 
  -6   7   0 6.02124 1.11217   4 
  -6   7   0 6.25211 1.32497   7 
  -5   7   0 54.6006  4.9626   6 
  -5   7   0 57.0682  3.9646   4 
  -5   7   0 59.9321  4.5760   7 
  -4   7   0 368.708  26.354   6 
  -4   7   0 409.719  22.050   4 
  -4   7   0 402.606  24.346   7 
  -3   7   0 158.397  12.698   3 
   2  -7   0 198.172  17.237   9 
  -2   7   0 233.731  16.619   3 
   1  -7   0 149.354  12.421   9 
   0  -7   0 129.348  11.039   9 
  -1  -7   0 109.794   9.805   9 
  -2  -7   0 226.842  19.254   9 
   2   7   0 232.311  14.273   5 
  -3  -7   0 52.0576  5.9261   9 
   3   7   0 49.1701  3.8613   5 
  -4  -7   0 425.609  21.498  14 
  -4  -7   0 385.846  26.529   2 
  -4  -7   0 372.867  34.730  15 
  -5  -7   0 10.6474  4.5058   1 
  -5  -7   0 14.7047  3.6359  15 
  -5  -7   0 8.15167 1.44152  11 
  -5  -7   0 9.69449 1.98319   2 
  -6  -7   0 34.9092  7.0964   1 
  -6  -7   0 41.5420  3.7333   2 
  -6  -7   0 45.2282  5.6201  15 
  -7  -7   0 2.27356 0.84956   2 
  -7  -7   0 2.85257 1.46067  15 
  -7   8   0 8.85613 1.32661   6 
  -7   8   0 11.7129  1.2740   7 
  -7   8   0 12.7610  1.1675   4 
  -6   8   0 60.4610  4.9821   6 
  -6   8   0 60.5320  4.4714   7 
  -6   8   0 61.4456  3.9910   4 
  -5   8   0 4.09038 1.42725   6 
  -5   8   0 3.76647 0.91307   4 
  -5   8   0 3.40590 1.14491   7 
  -4   8   0 71.1397  5.2132   7 
  -4   8   0 76.9131  4.6606   4 
  -4   8   0 61.6596  5.7624   6 
   3  -8   0 446.261  49.847   1 
  -3   8   0 492.271  28.477  10 
  -3   8   0 477.892  28.901   8 
  -3   8   0 480.383  31.619   6 
   2  -8   0 21.7808  3.1886   9 
   1  -8   0 269.540  21.877   9 
   0  -8   0 4.88402 1.74559   9 
  -1  -8   0 194.705  16.532   9 
   2   8   0 20.8176  2.1995   8 
  -3  -8   0 329.127  20.001  11 
  -3  -8   0 349.893  22.697   2 
  -3  -8   0 367.867  37.397   1 
  -3  -8   0 308.380  29.694  15 
  -4  -8   0 11.4437  4.6002   1 
  -4  -8   0 15.1649  1.8410  14 
  -4  -8   0 14.9046  2.2937   2 
  -4  -8   0 14.4719  3.6568  15 
  -4  -8   0 12.7792  1.7443  11 
  -5  -8   0 28.7656  3.0428   2 
  -5  -8   0 26.8640  4.8721  15 
  -5  -8   0 35.0975  6.9436   1 
  -6  -8   0 69.2829  8.9202   1 
  -6  -8   0 56.1058  6.5195  15 
  -6  -8   0 56.2337  4.6488   2 
  -7  -8   0 50.8203  5.0673  15 
  -6   9   0 30.7973  3.0254   6 
  -6   9   0 35.5294  2.7027   7 
  -6   9   0 34.0188  2.3497   4 
  -5   9   0 52.8540  3.6585   4 
  -5   9   0 58.7566  4.2163   7 
  -5   9   0 57.2633  4.8499   6 
  -4   9   0 156.056  10.039   7 
  -4   9   0 149.725   9.018   4 
  -4   9   0 159.161  11.337   6 
   3  -9   0 1.89183 2.63136   1 
  -3   9   0 9.86663 1.95922   6 
  -3   9   0 5.50962 1.10223  10 
  -3   9   0 6.30176 1.50358   8 
   2  -9   0 139.365  16.366   1 
  -2   9   0 146.337   9.224  10 
  -2   9   0 132.232   9.230   8 
  -2   9   0 135.851  10.157   6 
   1  -9   0 241.919  25.288   1 
  -1   9   0 213.730  14.296   8 
   0  -9   0 341.249  33.575   1 
   0   9   0 281.343  18.919   8 
  -1  -9   0 126.387  16.653   1 
   1   9   0 155.059   9.322   8 
  -2  -9   0 207.116  23.793   1 
   2   9   0 207.281  12.998   8 
  -3  -9   0 40.7221  6.3218  15 
  -3  -9   0 39.4643  7.9168   1 
   3   9   0 47.8133  3.5259   8 
  -4  -9   0 183.725  18.731  15 
  -4  -9   0 220.726  14.194   2 
  -4  -9   0 196.414  11.425  14 
  -4  -9   0 216.148  24.010   1 
  -5  -9   0 87.6563 10.6202   1 
  -5  -9   0 60.9828  7.5268  15 
  -5  -9   0 70.8770  5.5007   2 
  -6  -9   0 4.17261 0.96267   2 
  -6  -9   0 3.49271 1.53129  15 
  -6  10   0 42.9628  3.3170   6 
  -6  10   0 39.5097  2.5475   4 
  -5  10   0 47.5712  3.8839   6 
  -5  10   0 43.3968  3.1587   7 
  -5  10   0 40.1153  2.7945   4 
  -4  10   0 189.011  11.768   8 
  -4  10   0 172.553  10.299   4 
  -4  10   0 186.188  12.939   6 
  -3  10   0 129.291   8.098  10 
  -3  10   0 129.557   9.598   6 
  -3  10   0 125.363   8.736   8 
   2 -10   0 55.2905  9.0103   1 
  -2  10   0 70.3377  5.7935   6 
  -2  10   0 73.9291  5.1470  10 
  -2  10   0 76.5079  5.4250   8 
   1 -10   0 84.5965  9.5259   1 
  -1  10   0 56.0712  4.8255   8 
  -1  10   0 57.5005  4.8640  10 
   0 -10   0 258.274  26.304   1 
   0  10   0 213.231  14.678   8 
  -1 -10   0 88.3003 12.2587   1 
   1  10   0 102.071   6.713   8 
  -2 -10   0 32.2689  6.5407   1 
   2  10   0 29.9887  2.7195   8 
  -3 -10   0 118.046   7.556  14 
  -3 -10   0 129.693  15.565   1 
  -3 -10   0 116.708  12.118  15 
   3  10   0 128.005   8.100   8 
  -4 -10   0 155.029  16.869   1 
  -4 -10   0 127.593  12.938  15 
  -4 -10   0 132.321   7.680  14 
  -5 -10   0 15.3662  3.9077   1 
  -5 -10   0 12.8501  2.6498  15 
  -5 -10   0 14.6742  1.7391   2 
  -5  11   0 23.2310  2.2838   6 
  -4  11   0 39.7382  3.6149   6 
  -3  11   0 40.3995  3.8006   6 
  -3  11   0 40.4202  3.5381   8 
   2 -11   0 92.0685 13.2166   1 
  -2  11   0 115.698   7.830   8 
  -2  11   0 119.423   7.564  10 
  -2  11   0 119.892   8.418   6 
   1 -11   0 104.184  12.116   1 
  -1  11   0 85.3516  6.5960   8 
  -1  11   0 91.5851  6.5904  10 
   0 -11   0 1174.83  110.16   1 
   0  11   0 970.517  63.401   8 
  -1 -11   0 116.232  14.128   1 
   1  11   0 110.086   7.610   8 
  -2 -11   0 69.5523 10.3334   1 
  -2 -11   0 73.9666  5.3320  14 
   2  11   0 85.3366  5.5321   8 
  -3 -11   0 21.8494  4.9073   1 
  -3 -11   0 18.6878  2.0953  14 
   3  11   0 23.0440  2.0911   8 
  -4 -11   0 27.1198  3.7491  15 
  -4 -11   0 23.9740  4.7636   1 
  -4  12   0 36.5880  3.0410   6 
  -3  12   0 6.71147 1.31845   8 
  -3  12   0 4.50261 1.13423   6 
   2 -12   0 14.2072  3.7120   1 
  -2  12   0 24.5969  1.9857  10 
  -2  12   0 23.7950  2.4693   8 
  -2  12   0 22.7018  2.4935   6 
  -1  12   0 137.727   8.814   8 
  -1  12   0 126.036   8.602  10 
   0 -12   0 40.3693  6.1640   1 
   0  12   0 32.2367  3.0489  10 
   0  12   0 35.1220  3.0570   8 
  -1 -12   0 137.863  17.812   1 
   1  12   0 172.157  10.119   8 
  -2 -12   0 28.2740  2.6378  14 
  -2 -12   0 21.8706  4.8091   1 
   2  12   0 28.8704  2.3741   8 
  -3 -12   0 3.09758 0.76393  14 
  -3 -12   0 4.94763 2.32667   1 
   3  12   0 2.70008 0.78317   8 
  -2  13   0 7.52340 1.21624   8 
   1 -13   0 33.0781  5.1047   1 
  -1  13   0 32.6660  2.7593   8 
  -1  13   0 35.9285  2.5978  10 
   0 -13   0 14.7427  3.3319   1 
   0  13   0 12.4357  1.5459  10 
   0  13   0 10.3567  1.4398   8 
  -1 -13   0 12.9043  3.1805   1 
   1  13   0 15.5426  1.5830   8 
  -2 -13   0 16.3103  3.2269   1 
  -2 -13   0 14.1255  1.4339  14 
   2  13  -1 3.02383 0.77420   8 
  -2 -13   1 2.97264 1.96748   1 
  -2 -13   1 1.25977 0.78409  14 
   1  13  -1 35.0429  2.6104   8 
  -1 -13   1 24.3123  4.9527   1 
   0  13  -1 32.0444  2.9274  10 
   0  13  -1 38.5896  3.0450   8 
   0 -13   1 44.8134  6.0285   1 
  -1  13  -1 52.0481  3.7130  10 
  -1  13  -1 48.0466  3.8067   8 
   1 -13   1 51.8167  7.0647   1 
  -2  13  -1 2.07729 0.84904   8 
  -2  13  -1 2.22963 0.90266   6 
   2 -13   1 3.02921 1.99969   1 
  -3  13  -1 48.6889  3.7570   6 
  -4 -12   1 31.1292  4.8354   1 
   3  12  -1 27.6801  2.1855   8 
  -3 -12   1 17.7247  4.2974   1 
  -3 -12   1 26.9561  2.0829  14 
   2  12  -1 22.2626  2.0280   8 
  -2 -12   1 18.9633  2.2443  14 
  -2 -12   1 15.5620  4.1763   1 
   1  12  -1 36.3356  2.9445   8 
  -1 -12   1 27.2125  5.7301   1 
   0  12  -1 52.3445  4.1734   8 
   0 -12   1 54.2597  7.9051   1 
  -1  12  -1 33.1535  3.1208  10 
  -1  12  -1 36.2529  3.2675   8 
   1 -12   1 44.0928  6.3473   1 
  -2  12  -1 20.1597  2.1399  10 
  -2  12  -1 24.4182  2.5888   8 
  -2  12  -1 23.1293  2.6828   6 
   2 -12   1 19.0762  4.1813   1 
  -3  12  -1 52.4668  4.5238   6 
  -3  12  -1 57.0704  4.2026   8 
  -4  12  -1 29.4317  2.7699   6 
  -5 -11   1 96.7375  8.9731  15 
   4  11  -1 12.9395  1.5069   8 
  -4 -11   1 14.9145  2.9503  15 
  -4 -11   1 12.9255  3.7122   1 
   3  11  -1 7.71040 1.29190   8 
  -3 -11   1 9.94276 2.90282  15 
  -3 -11   1 12.0797  3.8275   1 
  -3 -11   1 8.06185 1.42622  14 
  -2 -11   1 12.3802  4.0028   1 
   1  11  -1 54.9226  3.9573   8 
  -1 -11   1 39.0641  7.5751   1 
   0  11  -1 31.1379  2.9694   8 
   0 -11   1 31.8242  6.0138   1 
  -1  11  -1 31.6429  3.4173   6 
  -1  11  -1 26.4697  2.9636   8 
  -1  11  -1 27.7857  3.0043  10 
  -2  11  -1 15.9350  2.3942   6 
  -2  11  -1 15.7168  2.0684  10 
  -2  11  -1 18.9438  2.4149   8 
   2 -11   1 15.1874  4.0324   1 
  -3  11  -1 86.7067  6.4798   6 
  -3  11  -1 87.9417  5.8890   8 
   3 -11   1 64.0300  9.8416   1 
  -4  11  -1 42.5211  3.9364   6 
  -5  11  -1 29.6500  2.8181   6 
  -6 -10   1 8.99028 1.83731  15 
  -5 -10   1 23.1976  3.9979  15 
  -5 -10   1 28.9610  5.4578   1 
  -5 -10   1 32.7239  2.7503   2 
   4  10  -1 23.4964  2.1306   8 
  -4 -10   1 24.3275  4.1314  15 
  -4 -10   1 21.0551  5.2123   1 
  -4 -10   1 20.3405  1.9932  14 
   3  10  -1 106.199   6.801   8 
  -3 -10   1 100.747  13.250   1 
  -3 -10   1 92.1390 10.3981  15 
   2  10  -1 63.1084  4.5043   8 
  -2 -10   1 56.5945  9.0018   1 
   1  10  -1 89.3443  5.6771   8 
  -1 -10   1 65.1548 10.1342   1 
   0  10  -1 145.106  10.090   8 
   0 -10   1 168.032  18.324   1 
  -1  10  -1 102.744   7.418   8 
  -1  10  -1 100.601   8.101   6 
  -1  10  -1 100.168   7.500  10 
   1 -10   1 131.349  13.754   1 
  -2  10  -1 32.6771  3.0497   8 
  -2  10  -1 28.1833  3.0156  10 
  -2  10  -1 35.7436  3.8248   6 
   2 -10   1 26.7240  5.5184   1 
  -3  10  -1 117.392   7.294  10 
  -3  10  -1 112.991   7.810   8 
  -3  10  -1 125.648   8.788   6 
   3 -10   1 93.0872 13.3811   1 
  -4  10  -1 0.77996 1.05916   6 
   4 -10   1 -0.0789  2.0474   1 
  -5  10  -1 85.8385  5.6611   7 
  -5  10  -1 82.0201  5.0085   4 
  -5  10  -1 81.8303  6.4647   6 
  -6  10  -1 52.4666  3.9349   6 
  -6  10  -1 45.3686  3.0149   4 
  -6  10  -1 50.4750  3.4213   7 
  -6  -9   1 129.070   8.877   2 
  -6  -9   1 124.947  11.876  15 
  -5  -9   1 20.6094  4.0429  15 
  -5  -9   1 19.8519  2.5363   2 
  -5  -9   1 25.8086  5.6593   1 
  -4  -9   1 11.8084  1.5973  11 
  -4  -9   1 9.25696 4.28896   1 
  -4  -9   1  9.9999  3.2189  15 
  -4  -9   1 15.9298  1.7916  14 
  -4  -9   1 11.9034  2.0385   2 
  -3  -9   1 56.0315  7.4109  15 
  -3  -9   1 73.9874 10.0005   1 
   2   9  -1 302.762  17.101   8 
  -2  -9   1 243.631  24.486  15 
  -2  -9   1 277.889  30.680   1 
   1   9  -1 4.18101 1.04154   8 
  -1  -9   1 2.55774 2.53274   1 
   0   9  -1 6.41863 1.28636   8 
  -1   9  -1 10.4594  1.6378   8 
  -2   9  -1 417.528  24.272  10 
  -2   9  -1 393.566  26.561   6 
  -2   9  -1 377.756  24.153   8 
   2  -9   1 392.832  42.109   1 
  -3   9  -1 144.519   9.370   8 
  -3   9  -1 146.859   8.910  10 
  -3   9  -1 150.371  10.425   6 
   3  -9   1 113.574  16.092   1 
  -4   9  -1 25.5212  2.1052   4 
  -4   9  -1 27.0245  2.5447   7 
  -4   9  -1 31.3984  3.4540   6 
   4  -9   1 15.7446  4.6195   1 
  -5   9  -1 11.7673  1.6884   7 
  -5   9  -1 8.58112 1.23138   4 
  -5   9  -1 11.0350  2.0148   6 
  -6   9  -1 180.772  12.722   6 
  -6   9  -1 183.224  10.507   4 
  -6   9  -1 189.200  11.671   7 
  -7  -8   1 29.8260  2.5241   2 
  -7  -8   1 31.3761  3.6356  15 
  -6  -8   1 125.529   9.121   2 
  -6  -8   1 129.998  12.436  15 
  -5  -8   1 50.0777  3.8707  11 
  -5  -8   1 55.4798  4.6923   2 
  -5  -8   1 59.8865  9.0118   1 
  -5  -8   1 45.9842  7.0284  15 
  -4  -8   1 9.80205 1.95357   2 
  -4  -8   1 8.09391 3.09376  15 
  -4  -8   1 8.59267 1.44665  11 
  -4  -8   1 10.0499  1.5445  14 
  -4  -8   1 7.00194 4.01146   1 
   3   8  -1 264.190  16.863   5 
  -3  -8   1 265.818  18.409   2 
  -3  -8   1 283.045  30.390   1 
  -3  -8   1 271.065  16.174  11 
  -2  -8   1 19.2131  3.5525   9 
  -1  -8   1 440.152  35.070   9 
   1  -8   1 594.659  46.413   9 
  -2   8  -1 114.488   9.236   3 
   2  -8   1 107.338   9.539   9 
  -3   8  -1 97.3502  6.4050  10 
  -4   8  -1 53.0732  3.6204   4 
  -4   8  -1 47.3277  4.6030   6 
  -4   8  -1 50.6948  4.1531   7 
  -4   8  -1 53.7413  6.9368   1 
  -5   8  -1 19.8026  1.9734   4 
  -5   8  -1 20.0625  2.4153   7 
  -5   8  -1 15.9721  2.4898   6 
  -6   8  -1 68.0958  5.5199   6 
  -6   8  -1 73.2052  5.0977   7 
  -6   8  -1 65.5786  4.4290   4 
  -7   8  -1 15.9882  1.6784   7 
  -7   8  -1 16.2528  1.4271   4 
  -7  -7   1 14.1996  2.6998  15 
  -7  -7   1 11.6906  1.6424   2 
  -6  -7   1 4.62743 1.39260   2 
  -6  -7   1 5.64819 2.53008  15 
  -5  -7   1 86.6293 11.9903   1 
  -5  -7   1 78.9845  5.7111  11 
  -5  -7   1 88.2083  6.8030   2 
  -5  -7   1 82.9802  9.4801  15 
   4   7  -1 72.7481  5.7048   5 
  -4  -7   1 81.3084  5.4348  11 
  -4  -7   1 84.5089  6.5065   2 
  -4  -7   1 79.7639  8.9792  15 
  -4  -7   1 77.9735  4.9945  14 
   3   7  -1 372.534  23.109   5 
  -3  -7   1 394.043  23.403   5 
  -3  -7   1 361.607  30.630   9 
   2   7  -1 184.602  11.940   5 
  -2  -7   1 200.059  12.190   5 
  -2  -7   1 187.776  16.153   9 
  -1  -7   1 592.546  46.371   9 
   0  -7   1 19.4543  2.7761   9 
  -1   7  -1 657.440  50.238   3 
   1  -7   1 718.079  53.184   9 
  -2   7  -1 100.542   8.246   3 
   2  -7   1 98.5416  8.4714   9 
  -3   7  -1 577.819  41.319   3 
   3  -7   1 536.067  43.179   9 
  -5   7  -1 287.734  17.916   7 
  -5   7  -1 284.765  16.127   4 
  -5   7  -1 275.228  19.373   6 
  -6   7  -1 4.41244 1.01502   4 
  -6   7  -1 3.87440 1.21236   7 
  -6   7  -1 5.46064 1.54399   6 
  -7   7  -1 62.6007  4.6088   7 
  -7   7  -1 68.2573  4.2046   4 
  -7  -6   1 70.6299  7.3734  15 
  -7  -6   1 66.7701  5.3309   2 
  -6  -6   1 53.3907  4.6469   2 
  -6  -6   1 47.3613  3.8185  11 
  -6  -6   1 57.8109  6.8566  15 
  -5  -6   1 316.124  20.017  11 
  -5  -6   1 339.276  22.838   2 
  -5  -6   1 357.359  30.232  15 
  -4  -6   1 42.7210  3.6716   5 
  -4  -6   1 36.9856  5.3789   9 
  -3  -6   1 60.0484  6.2278   9 
  -3  -6   1 57.1098  4.4873   5 
  -2  -6   1 376.446  30.112   9 
  -2  -6   1 378.758  23.069   5 
  -1  -6   1 1718.52   88.77   5 
  -1  -6   1 1272.65  114.56   9 
   0   6  -1 654.415  53.866   3 
   0  -6   1 836.396  57.317   9 
  -1   6  -1 1331.22   96.37   3 
  -2   6  -1 639.691  45.170   3 
   2  -6   1 591.978  47.424   9 
  -3   6  -1 40.8460  3.9816   3 
   3  -6   1 38.7676  3.8415   9 
  -4   6  -1 0.77095 0.99545   3 
   4  -6   1 1.32391 0.96890   9 
  -5   6  -1 223.972  14.378   7 
  -5   6  -1 215.807  15.544   6 
  -5   6  -1 230.771  13.040   4 
  -6   6  -1 154.991  10.813   7 
  -6   6  -1 178.660   9.904   4 
  -6   6  -1 160.568  11.749   6 
  -7   6  -1 112.706   7.443   7 
  -7   6  -1 109.825   6.734   4 
  -8   6  -1 129.431   8.048   7 
  -8   6  -1 129.525   7.342   4 
  -7  -5   1 90.4743  9.3197  15 
  -7  -5   1 92.6765  6.9500   2 
  -6  -5   1 206.721  17.839  15 
  -6  -5   1 163.747  11.350  11 
  -6  -5   1 192.948  13.223   2 
   5   5  -1 3.00857 1.12656   5 
  -5  -5   1 3.47055 1.41229   5 
  -5  -5   1 5.82541 2.85110  15 
  -5  -5   1 3.80935 1.53593   2 
  -4  -5   1 119.987  10.510   9 
  -4  -5   1 107.062   7.803   5 
  -3  -5   1 303.408  24.541   9 
  -3  -5   1 303.287  18.843   5 
  -2  -5   1 34.2325  3.7133   9 
  -2  -5   1 33.3331  2.7344   5 
  -1  -5   1 331.202  30.039   9 
  -1  -5   1 439.681  23.294   5 
   0   5  -1 465.167  38.112   3 
   0  -5   1 587.135  40.512   9 
  -1   5  -1 510.798  38.411   3 
   1  -5   1 540.737  40.505   9 
  -2   5  -1 219.205  16.663   3 
  -2   5  -1 234.078  17.721  12 
   2  -5   1 208.769  17.333   9 
  -3   5  -1 113.246   9.434   3 
   3  -5   1 121.427   9.688   9 
  -4   5  -1 278.225  21.107   3 
   4  -5   1 275.540  21.884   9 
  -6   5  -1 142.868   9.495   7 
  -6   5  -1 138.959   8.592   4 
  -7   5  -1 27.0500  2.2250   4 
  -7   5  -1 24.4585  2.4096   7 
  -8   5  -1 3.44496 0.70471   4 
  -8   5  -1 2.98916 0.73683   7 
  -7  -4   1 25.5253  3.0589   2 
  -6  -4   1 131.034   9.410   2 
  -6  -4   1 129.125  12.585  15 
  -6  -4   1 114.557   7.914  11 
  -5  -4   1 46.6177  4.0962   5 
  -4  -4   1 173.294  14.576   9 
  -4  -4   1 167.830  11.157   5 
  -3  -4   1 119.473  10.452   9 
  -3  -4   1 123.569   8.052   5 
  -2  -4   1 1608.67  118.57   9 
  -2  -4   1 1489.64   91.81   5 
   1   4  -1 360.282  24.201   3 
  -1  -4   1 323.341  20.039   5 
  -1  -4   1 311.716  25.914   9 
   0   4  -1 5909.77  445.57   3 
   0  -4   1 6478.96  365.33   5 
  -1   4  -1 336.252  27.344   3 
   1  -4   1 411.717  28.864   9 
  -2   4  -1 1543.79  112.33  12 
  -2   4  -1 1385.39  104.64   3 
   2  -4   1 1413.85  110.44   9 
  -3   4  -1 277.624  21.220   3 
   3  -4   1 288.610  22.163   9 
  -4   4  -1 46.4571  4.4769   3 
   4  -4   1 50.0090  4.4929   9 
  -5   4  -1 32.9272  3.6092   3 
  -6   4  -1 147.646  10.369   7 
  -6   4  -1 168.938   9.573   4 
  -7   4  -1 76.7901  5.4825   7 
  -7   4  -1 78.0644  5.0043   4 
  -6  -3   1 170.352  11.525   2 
  -6  -3   1 145.348   9.706  11 
  -5  -3   1 58.3848  4.7369   5 
  -4  -3   1 20.9766  2.4823   5 
  -4  -3   1 26.3687  3.5665   9 
  -3  -3   1 86.8791  5.6399   5 
  -3  -3   1 76.6776  7.1999   9 
   2   3  -1 363.896  26.386   3 
  -2  -3   1 363.950  22.071   5 
  -2  -3   1 367.614  28.469   9 
   1   3  -1 1427.30   97.50   3 
  -1  -3   1 1279.00  103.37   9 
   0   3  -1 47.6257  4.1448   3 
   0  -3   1 53.4296  3.4149   5 
   0  -3   1 57.4902  4.4443   9 
  -1   3  -1 1582.43  122.73   3 
   1  -3   1 1821.99  129.70   9 
  -2   3  -1 1005.60   77.11  12 
  -2   3  -1 1010.92   71.95   3 
   2  -3   1 965.859  75.893   9 
  -3   3  -1 117.486   9.144   3 
   3  -3   1 116.085   9.448   9 
  -4   3  -1 16.1333  2.2326   3 
   4  -3   1 16.3076  2.0129   9 
  -5   3  -1 346.283  26.028   3 
  -6   3  -1 48.4793  3.7855   7 
  -6   3  -1 41.6277  3.3488   4 
  -7   3  -1 4.34848 1.06070   4 
  -5  -2   1 641.929  39.029   5 
  -4  -2   1 8.91689 1.53697   5 
  -4  -2   1 10.6974  2.1449   9 
   3   2  -1 18.4247  1.6434   3 
  -3  -2   1 20.7298  1.8967   5 
  -3  -2   1 18.7629  2.3214   9 
   2   2  -1 822.074  61.033   3 
  -2  -2   1 859.190  64.941   9 
  -2  -2   1 862.362  50.400   5 
   1   2  -1 546.949  38.392   3 
  -1  -2   1 530.990  31.680   5 
  -1  -2   1 518.783  40.801   9 
   0   2  -1 1697.76  135.24   3 
   0  -2   1 2062.59  143.21   9 
  -1   2  -1 287.427  22.821   3 
   1  -2   1 339.949  24.103   9 
  -2   2  -1 735.057  51.993   3 
   2  -2   1 699.896  54.874   9 
  -3   2  -1 184.793  13.813   3 
   3  -2   1 181.897  14.505   9 
  -4   2  -1 31.8905  3.2008   3 
   4  -2   1 35.8105  3.4087   9 
   5  -2   1 412.141  32.380   9 
  -6   2  -1 460.199  25.647   4 
  -4  -1   1 112.929   7.811   5 
  -4  -1   1 123.207  10.059   9 
  -3  -1   1 170.491  14.750   9 
  -3  -1   1 189.795  11.592   5 
  -3  -1   1 195.823  13.758   3 
  -2  -1   1 374.877  31.485   9 
  -2  -1   1 446.098  29.690   3 
  -2  -1   1 405.628  24.529   5 
   1   1  -1 961.659  66.763   3 
  -1  -1   1 893.240  70.662   9 
   0  -1   1 2667.63  204.50   9 
  -2   1  -1 283.037  18.047   5 
  -2   1  -1 332.434  22.127   3 
  -2   1  -1 291.411  23.448   9 
  -3   1  -1 76.1589  5.5547   3 
  -3   1  -1 68.7281  4.4847   5 
  -3   1  -1 69.5520  6.0200   9 
   3  -1   1 63.2437  4.3684   5 
  -4   1  -1 53.7109  4.9869   9 
  -4   1  -1 49.0410  4.3339   3 
   5  -1   1 255.204  20.542   9 
  -4   0   1 119.871   9.700   3 
  -4   0   1 125.523   8.228   5 
  -4   0   1 134.299  10.543   9 
  -3   0   1 356.842  22.350   5 
  -3   0   1 363.700  28.701   9 
  -3   0   1 389.495  27.112   3 
  -2   0   1 284.630  17.570   5 
  -2   0   1 274.181  22.531   9 
  -2   0   1 315.817  21.366   3 
  -1   0   1 1838.46  126.24   3 
  -1   0   1 1670.45  133.40   9 
   0   0   1 1093.49   84.75  12 
  -1   0  -1 -0.0355  0.1235   9 
  -2   0  -1 541.054  29.464   5 
  -2   0  -1 523.085  38.089   9 
  -2   0  -1 422.774  35.723   3 
  -3   0  -1 348.362  21.612   5 
  -3   0  -1 379.215  26.179   3 
  -3   0  -1 345.832  28.020   9 
  -4   0  -1 356.916  27.655   9 
  -4   0  -1 366.199  21.278   5 
   4   0   1 324.271  21.032   5 
  -5   0  -1 162.818  13.988   9 
  -5   1   1 8.12241 1.61476   3 
  -4   1   1 63.6408  5.3652   3 
   3  -1  -1 946.118  72.965   9 
  -3   1   1 1000.68   69.22   3 
  -3   1   1 918.189  56.698   5 
   2  -1  -1 2992.25  225.78   9 
  -2   1   1 2946.40  213.67   3 
   1  -1  -1 1020.33   73.65   9 
  -1   1   1 846.581  74.993  12 
  -1   1   1 1035.84   69.80   3 
   0  -1  -1 3785.91  287.99   9 
  -2  -1  -1 4323.72  336.76   9 
  -2  -1  -1 4638.29  318.27   3 
  -2  -1  -1 4317.15  261.02   5 
  -3  -1  -1 643.722  37.906   5 
  -3  -1  -1 622.029  49.023   9 
  -4  -1  -1 52.6552  3.6652   5 
  -4  -1  -1 42.5920  4.7342   9 
   4   1   1 44.1589  3.3621   5 
  -5  -1  -1 77.3501  7.4394   9 
   5   1   1 71.5917  5.1748   5 
  -6   2   1 55.0192  4.2548   7 
  -5   2   1 6.50103 1.50001   3 
  -4   2   1 125.654   9.950   3 
   3  -2  -1 888.732  67.893   9 
  -3   2   1 887.857  64.506   3 
   2  -2  -1 2334.75  176.58   9 
  -2   2   1 2308.18  179.79  12 
   1  -2  -1 267.271  20.770   9 
  -1   2   1 256.573  19.773   3 
  -1   2   1 288.244  21.281  12 
   0   2   1 1164.57   74.67   5 
   0   2   1 1368.08   91.12   3 
  -1  -2  -1 147.920   9.323   5 
  -1  -2  -1 151.443  12.156   9 
   1   2   1 157.790   9.272   5 
  -2  -2  -1 367.929  28.761   9 
  -3  -2  -1 1691.23  131.11   9 
  -3  -2  -1 1732.01  101.50   5 
  -4  -2  -1 32.8527  2.8527   5 
  -4  -2  -1 32.1533  3.8363   9 
   4   2   1 30.6424  2.6024   5 
  -5  -2  -1 151.058  12.808   9 
   5   2   1 135.294   9.245   5 
  -6  -2  -1 287.153  25.571  15 
  -7  -2  -1 8.74645 2.46498  15 
  -7   3   1 28.1163  2.2794   4 
  -7   3   1 29.8578  2.5775   7 
  -6   3   1 364.388  19.547   4 
  -6   3   1 329.496  21.422   7 
  -5   3   1 193.571  15.137   3 
  -4   3   1 71.4297  6.1472   3 
   3  -3  -1 80.7016  6.5345   9 
  -3   3   1 77.9281  6.5159   3 
   2  -3  -1 4019.73  321.50   9 
  -2   3   1 4270.93  304.34   3 
  -2   3   1 4398.48  327.26  12 
   1  -3  -1 392.890  28.318   9 
  -1   3   1 342.878  26.870   3 
   0   3   1 975.090  72.972   3 
   0   3   1 1049.18   59.80   5 
  -1  -3  -1 374.374  30.344   9 
   1   3   1 405.035  23.327   5 
  -2  -3  -1 2996.36  227.94   9 
  -2  -3  -1 2980.97  176.53   5 
  -3  -3  -1 524.862  31.741   5 
  -3  -3  -1 526.031  41.239   9 
  -4  -3  -1 15.3992  2.8622   9 
   4   3   1 12.2352  1.6288   5 
  -5  -3  -1 71.9777  7.5039   9 
   5   3   1 70.1362  5.1590   5 
  -6  -3  -1 75.8544  6.2832   2 
  -6  -3  -1 79.8496  8.7926  15 
  -7  -3  -1 178.481  15.903  15 
  -7  -3  -1 166.222  11.987   2 
  -7   4   1 147.164   8.680   4 
  -7   4   1 149.626   9.589   7 
  -6   4   1 19.9259  2.7280   6 
  -6   4   1 18.6876  2.2853   7 
  -6   4   1 21.2231  2.1408   4 
  -4   4   1 46.0908  4.4451   3 
   3  -4  -1 1491.91  120.50   9 
  -3   4   1 1550.91  114.40   3 
  -3   4   1 1700.97  123.09  12 
   2  -4  -1 158.844  13.975   9 
  -2   4   1 207.525  14.642  12 
  -2   4   1 173.923  13.538   3 
   1  -4  -1 1695.32  117.11   9 
  -1   4   1 1374.82  110.75   3 
   0   4   1 725.926  41.750   5 
   0   4   1 683.930  50.996   3 
  -1  -4  -1 1638.27  133.36   9 
   1   4   1 1848.18  103.14   5 
  -2  -4  -1 560.126  33.169   5 
  -2  -4  -1 556.759  43.119   9 
   2   4   1 538.652  33.018   5 
  -3  -4  -1 769.460  45.377   5 
  -3  -4  -1 756.878  58.917   9 
   3   4   1 739.351  45.174   5 
  -4  -4  -1 206.047  17.002   9 
   4   4   1 190.650  12.510   5 
  -5  -4  -1 365.323  37.488   1 
  -5  -4  -1 323.930  22.850   2 
   5   4   1 332.990  20.999   5 
  -6  -4  -1 18.0387  2.5235   2 
  -6  -4  -1 14.7940  3.6757  15 
  -6  -4  -1 11.1980  4.9083   1 
  -7  -4  -1 6.30883 2.23154  15 
  -7  -4  -1 5.43904 1.44323   2 
  -8  -4  -1 7.60582 1.63314  15 
  -8   5   1 9.32270 1.02926   7 
  -7   5   1 36.7328  2.9441   7 
  -7   5   1 33.0393  2.5815   4 
  -7   5   1 38.5813  3.3175   6 
  -6   5   1 71.7256  4.7093   4 
  -6   5   1 72.1839  5.8000   6 
  -6   5   1 69.5399  5.2577   7 
  -5   5   1 132.365   7.786   4 
  -5   5   1 123.611   9.413   6 
  -5   5   1 127.797   8.687   7 
  -4   5   1 163.326  13.042   3 
  -3   5   1 676.951  50.809  12 
  -3   5   1 606.880  47.104   3 
   2  -5  -1 313.871  27.491   9 
  -2   5   1 362.386  26.363   3 
  -2   5   1 393.295  28.388  12 
   1  -5  -1 1769.86  128.37   9 
  -1   5   1 1592.65  121.36   3 
   0  -5  -1 421.883  32.900   9 
  -1  -5  -1 1233.41  107.44   9 
   1   5   1 1564.68   83.03   5 
  -2  -5  -1 240.567  20.365   9 
   2   5   1 257.154  15.338   5 
  -3  -5  -1 346.473  27.954   9 
   3   5   1 341.517  21.040   5 
  -4  -5  -1 32.1667  4.7607   9 
   4   5   1 28.0962  2.6612   5 
  -5  -5  -1 103.093  11.533  15 
  -5  -5  -1 116.284  14.721   1 
  -5  -5  -1 111.991   8.402   2 
  -6  -5  -1 112.307  14.821   1 
  -6  -5  -1 114.861   8.528   2 
  -6  -5  -1 112.143  11.674  15 
  -7  -5  -1 69.4891  7.3968  15 
  -7  -5  -1 69.0390  5.3490   2 
  -7   6   1 51.2259  3.8383   7 
  -7   6   1 52.1914  4.2371   6 
  -7   6   1 55.0456  3.4947   4 
  -6   6   1 81.2376  5.8821   7 
  -6   6   1 75.9006  6.4076   6 
  -6   6   1 89.8924  5.3412   4 
  -5   6   1 142.783   8.634   4 
  -5   6   1 140.801  10.510   6 
  -5   6   1 149.159   9.676   7 
  -4   6   1 470.239  28.648   8 
  -3   6   1 216.450  16.781   3 
   2  -6  -1 419.940  37.735   9 
  -2   6   1 563.916  38.880  12 
  -2   6   1 486.638  35.992   3 
   1  -6  -1 4.46879 1.18784   9 
   0  -6  -1 730.216  56.556   9 
  -1  -6  -1 7.89288 1.90876   9 
   1   6   1 6.80413 0.97695   5 
  -2  -6  -1 377.678  30.450   9 
   2   6   1 379.287  22.966   5 
  -3  -6  -1 201.548  18.091   9 
   3   6   1 219.432  13.370   5 
  -4  -6  -1 708.208  48.372   2 
  -4  -6  -1 764.354  39.258  14 
   4   6   1 749.475  44.682   5 
  -5  -6  -1 13.4326  3.7587  15 
  -5  -6  -1 18.5306  5.4773   1 
  -5  -6  -1 13.6932  2.2453   2 
  -6  -6  -1 26.6513  4.7482  15 
  -6  -6  -1 32.3261  3.1209   2 
  -6  -6  -1 27.6711  6.5034   1 
  -7  -6  -1 7.15152 2.05377  15 
  -7  -6  -1 4.49940 1.09517   2 
  -7   7   1 13.1205  1.2666   4 
  -7   7   1 11.5815  1.3752   7 
  -7   7   1 9.85914 1.47645   6 
  -6   7   1 46.3134  3.6002   7 
  -6   7   1 43.7946  3.1587   4 
  -6   7   1 45.4432  4.0218   6 
  -5   7   1 17.8204  2.2227   7 
  -5   7   1 20.3005  2.7178   6 
  -5   7   1 19.0608  1.9443   4 
  -4   7   1 238.382  17.992   6 
  -4   7   1 268.539  16.646   8 
  -4   7   1 271.130  14.966   4 
  -4   7   1 271.403  16.562   7 
  -3   7   1 123.750  10.205   3 
  -3   7   1 123.268   8.340   8 
  -2   7   1 355.924  27.664  12 
  -2   7   1 326.703  25.547   3 
   1  -7  -1 159.549  13.337   9 
   0  -7  -1 657.975  51.342   9 
  -1  -7  -1 99.8602  9.1767   9 
  -2  -7  -1 285.201  23.614   9 
   3   7   1 45.6568  3.5798   5 
  -4  -7  -1 4.38678 3.56826   1 
  -4  -7  -1 4.77282 2.45434  15 
  -4  -7  -1 3.32807 1.28974   2 
  -4  -7  -1 2.34892 1.05017  14 
  -5  -7  -1 35.2313  6.0090  15 
  -5  -7  -1 46.8200  4.0887   2 
  -5  -7  -1 50.0300  8.8313   1 
  -6  -7  -1 6.55369 1.39461   2 
  -6  -7  -1 5.02956 2.15138  15 
  -6  -7  -1 5.05323 3.45068   1 
  -7  -7  -1 9.99004 1.30872   2 
  -7  -7  -1 8.43388 1.90126  15 
  -7   8   1 10.1681  1.3073   6 
  -7   8   1 10.7730  1.0469   4 
  -7   8   1 11.9321  1.1923   7 
  -6   8   1 4.73545 1.22266   6 
  -6   8   1 5.05731 0.88693   4 
  -6   8   1 4.46711 1.00570   7 
  -5   8   1 33.8063  2.9917   7 
  -5   8   1 38.8891  3.6285   6 
  -5   8   1 35.1573  2.6671   4 
  -4   8   1 210.070  12.399   4 
  -4   8   1 225.105  13.752   7 
  -4   8   1 212.639  15.176   6 
  -4   8   1 216.776  13.939   8 
  -3   8   1 3.42493 0.90061   4 
  -3   8   1 3.66146 1.35147   6 
  -3   8   1 2.70942 1.20093   8 
  -3   8   1 2.24188 0.85604  10 
  -2   8   1 164.075  10.869  10 
  -2   8   1 174.619  11.022   8 
   1  -8  -1 435.172  32.843   9 
  -1   8   1 388.647  33.128  12 
   0  -8  -1 132.865  11.757   9 
   1   8   1 281.453  17.298   8 
  -2  -8  -1 166.861  20.265   1 
   2   8   1 178.564  11.008   8 
  -3  -8  -1 9.41229 1.74375  14 
  -3  -8  -1 10.0033  3.2440  15 
  -3  -8  -1 13.5386  2.0123   2 
  -3  -8  -1 9.84744 4.10150   1 
  -4  -8  -1 58.0323  9.3670   1 
  -4  -8  -1 51.0386  4.1341  11 
  -4  -8  -1 61.7160  4.0607  14 
  -4  -8  -1 62.7362  7.2297  15 
  -4  -8  -1 61.5850  4.9216   2 
  -5  -8  -1 129.112  14.030  15 
  -5  -8  -1 158.235  18.487   1 
  -5  -8  -1 160.435  10.666   2 
  -6  -8  -1 19.8524  2.1126   2 
  -6  -8  -1 23.1594  3.5478  15 
  -6  -8  -1 20.4129  4.7018   1 
  -6   9   1 49.3325  3.4822   7 
  -6   9   1 50.0495  3.1585   4 
  -6   9   1 50.5230  4.0090   6 
  -5   9   1 93.0832  6.1087   7 
  -5   9   1 86.9923  6.9259   6 
  -5   9   1 91.7613  5.5108   4 
  -4   9   1 3.87692 1.34596   8 
  -4   9   1 6.88340 1.68680   6 
  -4   9   1 5.79160 1.00191   4 
  -3   9   1 123.901   8.379   8 
  -3   9   1 116.553   9.046   6 
  -3   9   1 121.317   7.721  10 
   2  -9  -1 60.6923  9.3728   1 
  -2   9   1 71.4664  5.9308   6 
  -2   9   1 74.4661  5.5097   8 
  -2   9   1 83.4522  5.4189  10 
   1  -9  -1 2.62018 2.61960   1 
  -1   9   1 1.92095 1.25638  10 
  -1   9   1 3.21272 1.21085   8 
   0  -9  -1 460.710  43.990   1 
   0   9   1 367.946  24.920   8 
  -1  -9  -1 7.59700 3.48837   1 
   1   9   1 5.92669 1.31226   8 
  -2  -9  -1 39.7230  7.5211   1 
   2   9   1 42.9975  3.4060   8 
  -3  -9  -1 93.1373  6.1703  14 
  -3  -9  -1 83.7022  9.7400  15 
  -3  -9  -1 101.661  12.883   1 
   3   9   1 99.9182  6.4608   8 
  -4  -9  -1 6.86860 2.57578  15 
  -4  -9  -1 5.45406 1.13396  14 
  -4  -9  -1 6.57061 3.59651   1 
  -4  -9  -1 6.94230 1.45521   2 
  -5  -9  -1 0.85665 2.67820   1 
  -5  -9  -1 1.67023 1.55861  15 
  -5  -9  -1 1.89438 0.90679   2 
  -6  -9  -1 47.0117  4.8354  15 
  -6  -9  -1 47.0314  3.5380   2 
  -5  10   1 51.4388  3.9772   6 
  -5  10   1 43.6714  2.9282   4 
  -4  10   1 25.0000  2.7167   8 
  -4  10   1 23.2966  1.8391   4 
  -4  10   1 23.1977  2.8556   6 
  -3  10   1 8.70596 1.82356   6 
  -3  10   1 7.50281 1.60714   8 
   2 -10  -1 55.0288  8.3383   1 
  -2  10   1 67.1534  5.2524   6 
  -2  10   1 64.7042  4.6708  10 
  -2  10   1 57.5872  4.8153   8 
   1 -10  -1 9.60002 3.47776   1 
  -1  10   1 12.0341  1.9334   8 
  -1  10   1 7.77541 1.65840  10 
   0 -10  -1 155.607  16.569   1 
   0  10   1 120.027   8.940   8 
  -1 -10  -1 2.38489 2.72144   1 
   1  10   1 2.62222 1.04122   8 
  -2 -10  -1 56.9229  4.5235  14 
  -2 -10  -1 58.7154  9.0358   1 
   2  10   1 64.3631  4.5714   8 
  -3 -10  -1 1.53902 0.98216  14 
  -3 -10  -1 2.45405 2.76756   1 
   3  10   1 1.43753 0.85401   8 
  -4 -10  -1 28.0982  5.6377   1 
  -4 -10  -1 28.4174  2.0949  14 
  -4 -10  -1 33.5570  4.5374  15 
  -5 -10  -1 26.4841  3.3116  15 
  -5 -10  -1 26.1326  2.2751   2 
  -5 -10  -1 28.9671  4.9958   1 
  -5  11   1 5.05509 0.97147   6 
  -4  11   1 1.46885 0.88590   8 
  -4  11   1 0.94639 0.85095   6 
  -3  11   1 14.5365  2.0873   6 
  -3  11   1 15.9766  2.1318   8 
   2 -11  -1 15.5139  4.2032   1 
  -2  11   1 30.1529  2.9722   8 
  -2  11   1 26.1697  2.2879  10 
   1 -11  -1 175.843  19.395   1 
  -1  11   1 155.757  10.827  10 
  -1  11   1 173.106  11.034   8 
   0 -11  -1 36.7142  6.2484   1 
   0  11   1 29.0243  2.8969   8 
  -1 -11  -1 140.654  17.116   1 
   1  11   1 147.063   9.474   8 
  -2 -11  -1 33.9691  3.1317  14 
  -2 -11  -1 33.1681  6.1085   1 
   2  11   1 30.5901  2.7470   8 
  -3 -11  -1 3.88123 1.00315  14 
  -3 -11  -1 6.29656 2.80098   1 
  -4 -11  -1 9.10397 2.87583   1 
  -3  12   1 21.0406  2.0982   6 
  -3  12   1 24.7969  2.2028   8 
  -2  12   1 11.5777  1.6789   8 
   1 -12  -1 4.05943 2.47134   1 
  -1  12   1 3.24117 1.07651   8 
  -1  12   1 2.11116 0.89207  10 
   0 -12  -1 27.8579  5.0127   1 
   0  12   1 22.2766  2.4384  10 
   0  12   1 22.1196  2.3655   8 
  -1 -12  -1 3.17529 2.42108   1 
   1  12   1 2.29766 0.84788   8 
  -2 -12  -1 17.9634  1.9632  14 
  -2 -12  -1 18.5435  3.9544   1 
   2  12   1 19.1301  1.7996   8 
  -3 -12  -1 23.6802  1.6283  14 
  -3 -12  -1 20.9385  3.9592   1 
  -1  13   1 12.7130  1.4371   8 
   0  13   1 21.7307  1.8505  10 
  -1 -14   2 4.30731 1.92864   1 
   0  14  -2 70.6600  4.9851   8 
   0  14  -2 72.1707  4.9940  10 
   0 -14   2 89.6787  9.3420   1 
  -1  14  -2 4.85452 0.78151  10 
   1 -14   2 6.97507 2.20775   1 
   3  13  -2 14.6917  1.3788   8 
  -3 -13   2 14.8511  1.1915  14 
  -3 -13   2 11.1677  2.8960   1 
   2  13  -2 10.1652  1.2814   8 
  -2 -13   2 7.83869 2.74594   1 
  -2 -13   2 8.72957 1.39636  14 
   1  13  -2 0.65409 0.68714   8 
  -1 -13   2 -0.8039  1.8025   1 
   0  13  -2 28.6414  2.5488   8 
   0  13  -2 24.5236  2.6611  10 
   0 -13   2 32.4025  5.5125   1 
  -1  13  -2 0.56680 0.76325  10 
  -1  13  -2 1.04785 0.83232   8 
   1 -13   2 0.56834 1.83721   1 
  -2  13  -2 11.3832  1.5465   8 
  -2  13  -2 6.37637 1.34972   6 
   2 -13   2 7.54451 2.57791   1 
  -3  13  -2 0.47267 0.76340   6 
   3 -13   2 -0.2734  1.4641   1 
   4  12  -2 23.0787  1.8759   8 
  -4 -12   2 23.4951  4.2828   1 
  -4 -12   2 21.4941  3.2262  15 
   3  12  -2 11.6551  1.4622   8 
  -3 -12   2 13.7004  2.9413  15 
  -3 -12   2 14.5034  3.7454   1 
  -3 -12   2 13.3791  1.6030  14 
   2  12  -2 18.8711  1.9697   8 
  -2 -12   2 15.4395  4.1644   1 
   1  12  -2 53.5595  3.9739   8 
  -1 -12   2 46.6230  7.5218   1 
   0  12  -2 59.1708  4.4928   8 
   0 -12   2 56.4583  8.2024   1 
  -1  12  -2 92.8816  6.4113   8 
  -1  12  -2 90.8278  6.3421  10 
  -1  12  -2 81.6191  6.7871   6 
   1 -12   2 92.8691 11.4827   1 
  -2  12  -2 26.5690  2.7638   8 
  -2  12  -2 25.8521  2.3216  10 
  -2  12  -2 23.8395  2.9369   6 
   2 -12   2 19.4533  4.6128   1 
  -3  12  -2 16.0572  2.1989   6 
   3 -12   2 8.57562 2.96098   1 
   4 -12   2 18.7837  3.6876   1 
  -5  12  -2 49.2396  3.8182   6 
  -5 -11   2 51.1010  5.5134  15 
   4  11  -2 6.25870 1.06921   8 
  -4 -11   2 4.74789 2.96041   1 
  -4 -11   2 5.13522 2.19646  15 
   3  11  -2 43.8331  3.2520   8 
  -3 -11   2 40.8263  5.9410  15 
  -3 -11   2 34.7609  6.9304   1 
   2  11  -2 87.2758  5.4724   8 
  -2 -11   2 67.2498  8.2674  15 
  -2 -11   2 69.4225 10.2229   1 
   1  11  -2 99.0678  6.5005   8 
  -1 -11   2 85.3437 11.8384   1 
   0  11  -2 171.103  11.227   8 
   0 -11   2 175.810  20.039   1 
  -1  11  -2 130.538  10.404   6 
  -1  11  -2 138.454   9.550   8 
   1 -11   2 165.881  17.294   1 
  -2  11  -2 93.6731  6.8165   8 
  -2  11  -2 89.2421  7.5115   6 
  -2  11  -2 105.243   6.827  10 
   2 -11   2 98.1199 12.2749   1 
  -3  11  -2 76.5825  5.7895   6 
   3 -11   2 55.5540  8.6033   1 
  -4  11  -2 38.1432  3.7381   6 
  -5  11  -2 5.56791 1.32759   6 
  -6 -10   2 18.1678  1.7466   2 
  -6 -10   2 18.0153  2.8195  15 
  -5 -10   2 25.8723  2.5214   2 
  -5 -10   2 22.3689  3.9182  15 
   4  10  -2 78.6260  5.3081   8 
  -4 -10   2 65.1897 10.4625   1 
  -4 -10   2 76.3101  8.5402  15 
  -4 -10   2 73.8415  4.7615  14 
  -4 -10   2 86.9593  6.1028   2 
  -3 -10   2 261.039  24.290  15 
  -3 -10   2 277.925  30.264   1 
   2  10  -2 141.522   8.254   8 
  -2 -10   2 105.092  12.133  15 
  -2 -10   2 118.546  15.255   1 
   1  10  -2 376.355  21.725   8 
  -1 -10   2 329.812  38.067   1 
   0  10  -2 49.2141  4.0735   8 
   0  10  -2 48.6989  4.6146   6 
   0 -10   2 64.9327  8.1669   1 
  -1  10  -2 294.768  18.184   8 
  -1  10  -2 289.172  19.987   6 
  -2  10  -2 195.489  12.211  10 
  -2  10  -2 184.506  12.129   8 
  -2  10  -2 183.328  13.438   6 
   2 -10   2 187.947  21.404   1 
  -3  10  -2 230.341  13.870  10 
  -3  10  -2 246.946  15.976   6 
   3 -10   2 195.549  24.792   1 
   4 -10   2 150.392  17.485   1 
  -5  10  -2 57.9720  4.1582   7 
  -5  10  -2 56.9079  4.8141   6 
  -5  10  -2 52.8057  3.5516   4 
  -6  10  -2 42.8761  2.7457   4 
  -6  10  -2 40.1507  3.4984   6 
  -6  10  -2 44.4402  3.1721   7 
  -6  -9   2 80.7309  8.6528  15 
  -6  -9   2 89.3753  6.3428   2 
  -5  -9   2 8.61591 2.87131  15 
  -5  -9   2 9.44359 1.79072   2 
  -4  -9   2 367.675  23.428   2 
  -4  -9   2 329.900  30.650  15 
  -4  -9   2 329.662  20.461  11 
  -4  -9   2 355.280  18.844  14 
  -3  -9   2 32.7367  5.4690  15 
  -3  -9   2 38.0306  7.1671   1 
  -2  -9   2 32.8429  6.3956   1 
   0  -9   2 290.343  23.633   9 
   1  -9   2 197.966  16.466   9 
  -2   9  -2 101.015   6.810  10 
  -2   9  -2 94.5637  6.6805   8 
  -2   9  -2 87.6339  8.2185   3 
   2  -9   2 105.416  12.237   1 
  -3   9  -2 180.484  18.300   1 
  -3   9  -2 168.492  10.306  10 
  -3   9  -2 171.516  11.890   6 
   3  -9   2 128.492  18.406   1 
  -4   9  -2 160.752  11.599   6 
  -4   9  -2 156.043  10.448   7 
  -4   9  -2 159.354  17.646   1 
  -4   9  -2 157.612   9.287   4 
  -5   9  -2 6.82340 1.10494   4 
  -5   9  -2 7.66289 1.45919   7 
  -5   9  -2 8.06968 2.43850   1 
  -5   9  -2 7.47479 1.70816   6 
   5  -9   2 0.45732 2.39897   1 
  -6   9  -2 15.4017  1.8607   7 
  -6   9  -2 13.4170  2.0456   6 
  -6   9  -2 16.8486  1.6234   4 
  -7   9  -2 2.58558 0.66584   7 
  -7   9  -2 2.51701 0.57463   4 
  -7  -8   2 5.03913 1.03470   2 
  -7  -8   2 4.86626 1.67578  15 
  -6  -8   2 4.47040 1.32707   2 
  -6  -8   2 4.47448 2.31626  15 
  -5  -8   2 27.1119  2.3755  11 
  -5  -8   2 25.6409  3.1670   2 
  -5  -8   2 21.5480  4.6128  15 
  -4  -8   2 29.5044  5.2136  15 
  -4  -8   2 25.6182  2.4633  11 
  -4  -8   2 35.7053  3.4596   2 
  -3  -8   2 207.358  13.014  11 
  -3  -8   2 225.934  14.022   5 
  -2  -8   2 28.6449  4.3104   9 
  -1   8  -2 70.4108  5.9521   3 
   1  -8   2 65.0524  6.1683   9 
  -2   8  -2 3.13293 1.30422   3 
   2  -8   2 2.58691 1.09162   9 
  -3   8  -2 83.8839  7.4924   3 
  -4   8  -2 57.0388  5.0035   6 
  -4   8  -2 52.5285  3.8434   4 
  -4   8  -2 61.2163  7.4757   1 
  -4   8  -2 55.4818  4.5086   7 
  -5   8  -2 150.769   9.472   4 
  -5   8  -2 153.651  11.604   6 
  -5   8  -2 169.557  10.769   7 
  -5   8  -2 168.924  17.855   1 
  -6   8  -2 5.81890 1.52956   6 
  -6   8  -2 6.40735 1.34887   7 
  -6   8  -2 4.76025 1.00089   4 
  -7   8  -2 2.28440 0.79397   7 
  -7   8  -2 2.43753 0.68159   4 
  -7  -7   2 12.2042  2.6393  15 
  -7  -7   2 9.75507 1.58129   2 
  -6  -7   2 31.1422  3.2470   2 
  -6  -7   2 29.6054  5.1331  15 
  -5  -7   2 66.6015  8.5789  15 
  -5  -7   2 77.4584  6.1863   2 
  -5  -7   2 72.9432  5.1216  11 
  -4  -7   2 56.0782  3.9381   8 
  -4  -7   2 53.4020  3.9896  11 
  -4  -7   2 53.4031  4.9470   2 
  -4  -7   2 56.4336  4.6623   5 
  -3  -7   2 18.3618  3.4006   9 
  -3  -7   2 16.8498  2.3180   5 
  -3  -7   2 14.7192  1.7169  11 
  -2  -7   2 138.861  12.422   9 
  -2  -7   2 142.018   8.741  11 
  -2  -7   2 147.438   9.385   5 
  -1  -7   2 239.338  19.449   9 
   0   7  -2 1309.20  106.73   3 
   0  -7   2 1649.62  113.22   9 
  -1   7  -2 319.769  25.098   3 
   1  -7   2 354.056  26.480   9 
  -2   7  -2 118.794   8.955   3 
   2  -7   2 99.5299  9.0043   9 
  -3   7  -2 54.4027  5.1507   3 
   3  -7   2 52.8235  5.0369   9 
  -5   7  -2 22.2309  4.0428   1 
  -5   7  -2 15.9430  2.0422   4 
  -5   7  -2 19.9232  2.5156   7 
  -5   7  -2 18.6652  2.7038   6 
  -6   7  -2 58.1729  4.0961   4 
  -6   7  -2 59.4769  4.6504   7 
  -7   7  -2 98.9790  5.9105   4 
  -7   7  -2 93.3659  6.4865   7 
  -7  -6   2 83.6182  6.3564   2 
  -7  -6   2 82.4951  8.5039  15 
  -6  -6   2 5.14943 2.72201  15 
  -6  -6   2 5.27155 1.64285   2 
  -5  -6   2 166.195  10.627  11 
  -5  -6   2 179.666  12.446   2 
  -5  -6   2 163.568  16.493  15 
  -4  -6   2 68.8792  5.2534   5 
  -4  -6   2 67.3799  7.0132   9 
  -4  -6   2 64.0432  4.5985  11 
  -3  -6   2 187.623  11.570   5 
  -3  -6   2 175.363  15.051   9 
  -3  -6   2 169.035  10.697  11 
  -2  -6   2 724.174  52.621   9 
  -2  -6   2 624.162  38.826  11 
  -2  -6   2 680.557  40.557   5 
  -1  -6   2 602.127  45.974   9 
  -1  -6   2 581.407  34.066  11 
   0   6  -2 891.374  72.212   3 
   0  -6   2 1106.70   76.56   9 
  -1   6  -2 550.345  45.943   3 
   1  -6   2 708.832  48.577   9 
  -2   6  -2 927.272  67.673   3 
   2  -6   2 930.547  71.262   9 
  -3   6  -2 112.122   9.496   3 
   3  -6   2 120.679   9.748   9 
  -4   6  -2 36.5021  3.8863   3 
   4  -6   2 35.1896  3.6791   9 
  -5   6  -2 193.630  20.241   1 
  -5   6  -2 185.508  10.887   4 
  -5   6  -2 173.985  12.942   6 
  -5   6  -2 179.014  12.025   7 
  -6   6  -2 44.4371  3.8792   7 
  -6   6  -2 48.3737  3.5873   4 
  -7   6  -2 3.36533 1.01822   7 
  -7   6  -2 3.45836 0.93162   4 
  -8   6  -2 -0.3669  0.4575   4 
  -7  -5   2 18.7296  2.5290   2 
  -6  -5   2 28.1736  5.0996  15 
  -6  -5   2 33.2918  2.7535  11 
  -6  -5   2 32.3507  3.7326   2 
  -5  -5   2 11.1153  1.6342  11 
  -5  -5   2 13.0328  2.2061   5 
  -5  -5   2 13.1304  2.3921   2 
  -4  -5   2 4.75055 1.39179   5 
  -4  -5   2 6.51554 2.10560   9 
  -3  -5   2 305.197  19.339   5 
  -3  -5   2 318.116  25.046   9 
  -2  -5   2 381.837  23.547   5 
  -2  -5   2 391.735  30.456   9 
   1   5  -2 290.475  20.416   3 
  -1  -5   2 235.531  21.813   9 
  -1  -5   2 308.189  17.007   5 
   0   5  -2 33.9447  3.1438   3 
   0  -5   2 35.6251  2.5649   5 
   0  -5   2 42.3308  3.4382   9 
  -1   5  -2 243.494  20.668   3 
   1  -5   2 315.223  21.825   9 
  -2   5  -2 734.979  52.604   3 
   2  -5   2 707.716  55.339   9 
  -3   5  -2 483.429  36.452   3 
   3  -5   2 503.855  38.266   9 
  -4   5  -2 86.4867  7.6787   3 
   4  -5   2 94.9857  7.8628   9 
  -6   5  -2 6.86294 1.51343   7 
  -6   5  -2 4.81463 1.28514   4 
  -7   5  -2 49.6621  3.9740   7 
  -7   5  -2 54.2127  3.6941   4 
  -8   5  -2 80.2738  4.7931   4 
  -7  -4   2 18.8160  2.5810   2 
  -6  -4   2 5.98406 1.20389  11 
  -6  -4   2 6.48993 1.80747   2 
  -5  -4   2 228.138  14.344  11 
  -5  -4   2 248.816  15.428   5 
  -4  -4   2 205.960  13.283   5 
  -3  -4   2 215.088  17.270   9 
  -3  -4   2 209.867  13.411   5 
   2   4  -2 253.123  17.829   3 
  -2  -4   2 245.336  19.401   9 
  -2  -4   2 232.677  15.056   5 
   1   4  -2 407.546  29.009   3 
  -1  -4   2 390.853  30.928   9 
   0   4  -2 1551.35  120.13   3 
   0  -4   2 1642.53   98.49   5 
   0  -4   2 1810.25  127.07   9 
  -2   4  -2 130.391   9.874   3 
   2  -4   2 125.698  10.221   9 
   3  -4   2 33.1675  3.1949   9 
  -4   4  -2 176.841  13.604   3 
   4  -4   2 171.915  14.093   9 
  -5   4  -2 498.195  37.382   3 
   5  -4   2 507.443  39.298   9 
  -6   4  -2 18.2867  4.1979   1 
  -6   4  -2 9.67348 1.77359   7 
  -6   4  -2 16.1456  2.0034   4 
  -7   4  -2 11.3809  1.5992   4 
  -7   4  -2 16.1424  1.9888   7 
  -8   4  -2 5.47625 0.86354   4 
  -6  -3   2 55.7969  5.1467   2 
  -6  -3   2 56.6751  4.0685  11 
  -5  -3   2 260.136  15.755  11 
  -5  -3   2 266.664  16.840   5 
  -4  -3   2 81.2387  5.8345   5 
   3   3  -2 117.514   9.146   3 
  -3  -3   2 130.837  10.360   9 
  -3  -3   2 125.651   8.104   5 
   2   3  -2 1600.58  115.13   3 
  -2  -3   2 1593.41   94.81   5 
  -2  -3   2 1606.18  122.15   9 
   1   3  -2 2732.47  192.35   3 
  -1  -3   2 2820.75  157.94   5 
  -1  -3   2 2472.12  203.55   9 
   0   3  -2 7125.13  539.61   3 
   0  -3   2 7399.95  442.26   5 
   0  -3   2 7988.94  570.73   9 
   1  -3   2 2543.02  193.46   9 
  -2   3  -2 1945.60  137.35   3 
   2  -3   2 1864.56  145.10   9 
  -3   3  -2 183.429  13.761   3 
   3  -3   2 179.646  14.423   9 
  -4   3  -2 78.8782  6.6089   3 
   4  -3   2 79.4542  6.8745   9 
   5  -3   2 87.2883  7.7564   9 
  -6   3  -2 237.430  25.533   1 
  -6   3  -2 222.826  13.368   4 
  -7   3  -2 188.292  11.000   4 
  -5  -2   2 41.8630  3.7279   5 
  -5  -2   2 42.3321  3.1281  11 
  -4  -2   2 111.138   7.542   5 
   3   2  -2 378.380  28.391   3 
  -3  -2   2 409.164  30.444   9 
  -3  -2   2 385.491  23.738   5 
   2   2  -2 204.496  14.519   3 
  -2  -2   2 199.513  12.219   5 
  -2  -2   2 191.192  15.551   9 
   1   2  -2 304.764  23.296   3 
  -1  -2   2 307.563  24.712   9 
  -1  -2   2 356.323  19.318   5 
   0   2  -2 36.0953  2.6239   3 
   0  -2   2 32.1440  2.7209   9 
   0  -2   2 32.0915  2.1591   5 
  -1   2  -2 267.323  18.065   3 
   1  -2   2 227.679  19.031   9 
  -2   2  -2 69.8391  4.8008   3 
   2  -2   2 53.3378  3.6518   5 
  -3   2  -2 424.234  30.103   3 
   3  -2   2 396.239  31.799   9 
  -4   2  -2 442.738  32.056   3 
   4  -2   2 427.566  33.953   9 
   5  -2   2 133.549  11.347   9 
  -6   2  -2 163.034  10.620   4 
  -6   2  -2 203.404  21.043   1 
  -4  -1   2 57.6588  4.3870  11 
  -4  -1   2 80.2288  5.1543   5 
  -4  -1   2 77.0349  5.7058   3 
  -3  -1   2 113.638   8.295   3 
  -3  -1   2 106.243   8.818   9 
  -3  -1   2 104.238   7.042   5 
  -2  -1   2 120.194   8.006   5 
  -2  -1   2 135.573   9.608   3 
   1   1  -2 882.433  68.829   3 
  -1  -1   2 1030.73   56.56   5 
   0   1  -2 648.589  46.796   3 
   0  -1   2 650.758  49.450   9 
  -1   1  -2 865.402  71.504   9 
  -1   1  -2 998.747  67.537   3 
   1  -1   2 943.890  55.326   5 
  -2   1  -2 63.2344  4.7135   3 
   2  -1   2 57.6884  3.7690   5 
  -3   1  -2 71.1918  6.0115   9 
  -3   1  -2 74.2623  5.3932   3 
   3  -1   2 59.5421  4.2567   5 
  -4   1  -2 238.557  19.322   9 
   5  -1   2 63.5701  6.0864   9 
  -6   1  -2 214.952  24.589   1 
  -5   0   2 122.465   9.716   3 
  -4   0   2 660.860  48.194   3 
  -3   0   2 322.175  23.095   3 
  -3   0   2 304.480  19.070   5 
   2   0  -2 675.238  52.440   9 
  -2   0   2 734.130  49.828   3 
  -2   0   2 655.086  40.872   5 
  -1   0   2 4259.07  266.00   3 
  -1   0   2 3140.17  217.69   5 
   0   0  -2 1535.03  112.46   9 
   0   0  -2 1615.34  106.37   3 
   0   0   2 1449.65  114.39  12 
   0   0   2 1315.95   87.18   5 
  -1   0  -2 4455.94  325.78   3 
   1   0   2 4609.17  267.21   5 
  -3   0  -2 876.059  65.978   9 
   3   0   2 837.622  50.812   5 
  -4   0  -2 290.700  22.787   9 
   4   0   2 275.266  17.171   5 
  -5   0  -2 120.061  10.890   9 
  -6   0  -2 71.9644 10.4533   1 
  -5   1   2 48.0975  4.4784   3 
  -4   1   2 176.337  13.510   3 
  -3   1   2 1238.77   89.61   3 
   2  -1  -2 1302.89   96.73   9 
  -2   1   2 1314.86   98.74  12 
  -2   1   2 1195.78   75.16   5 
   1  -1  -2 1411.87  111.89   9 
  -1   1   2 1531.30  114.05  12 
  -1   1   2 1471.91  106.00   3 
   0   1   2 249.229  14.746   5 
   0   1   2 241.557  17.963   3 
  -1  -1  -2 1100.27   88.00   9 
   1   1   2 1202.28   68.11   5 
  -3  -1  -2 798.413  62.025   9 
   3   1   2 806.299  47.751   5 
  -4  -1  -2 370.108  29.830   9 
   4   1   2 375.634  22.656   5 
  -5  -1  -2 3.72171 1.86781   9 
   5   1   2 3.62058 0.97130   5 
  -6  -1  -2 15.8562  5.5742   1 
  -6  -1  -2 34.3142  4.7761  15 
  -7  -1  -2 69.5557  9.5874   1 
  -7  -1  -2 61.3743  6.9146  15 
  -6   2   2 270.527  16.690   7 
  -6   2   2 263.477  18.076   6 
  -5   2   2 26.3644  3.0023   3 
  -4   2   2 302.268  22.686   3 
  -3   2   2 1073.96   77.89   3 
   2  -2  -2 344.148  28.520   9 
  -2   2   2 374.173  27.314   3 
  -2   2   2 402.015  29.454  12 
   1  -2  -2 462.029  35.831   9 
  -1   2   2 469.995  27.793   5 
  -1   2   2 448.371  34.012   3 
  -1   2   2 493.001  36.660  12 
   0   2   2 2192.58  160.86   3 
   0   2   2 2279.53  131.89   5 
  -1  -2  -2 414.285  33.244   9 
   1   2   2 442.906  25.574   5 
  -2  -2  -2 437.829  33.517   9 
   2   2   2 419.752  25.660   5 
  -3  -2  -2 782.360  60.020   9 
   3   2   2 764.614  46.103   5 
  -4  -2  -2 135.907  11.705   9 
   4   2   2 128.161   8.487   5 
  -5  -2  -2 58.6065  6.5640   9 
   5   2   2 59.8909  4.4274   5 
  -6  -2  -2 123.813  12.584  15 
  -6  -2  -2 129.018   9.393   2 
  -7  -2  -2 56.1821  8.6598   1 
  -7   3   2 66.8319  4.7373   7 
  -6   3   2 22.9299  2.4957   7 
  -6   3   2 20.8185  2.0981   4 
  -6   3   2 21.1026  2.6879   6 
  -5   3   2 77.0817  6.7996   3 
  -4   3   2 23.6621  2.7246   3 
  -3   3   2 730.734  53.362   3 
   2  -3  -2 44.9688  4.1724   9 
  -2   3   2 56.1199  4.7356  12 
  -2   3   2 53.5902  4.3397   3 
   1  -3  -2 423.524  29.894   9 
  -1   3   2 389.231  23.056   5 
  -1   3   2 344.905  28.268   3 
  -1   3   2 391.071  30.529  12 
   0  -3  -2 23.3443  2.1054   9 
   0   3   2 15.1087  1.5575   3 
   0   3   2 16.4879  1.2619   5 
  -1  -3  -2 475.888  37.755   9 
   1   3   2 494.062  28.972   5 
  -2  -3  -2 98.8611  8.6067   9 
   2   3   2 97.1593  6.2671   5 
  -3  -3  -2 695.311  53.203   9 
   3   3   2 666.571  40.701   5 
  -4  -3  -2 136.320  11.892   9 
   4   3   2 127.301   8.525   5 
   5   3   2 33.8203  2.9733   5 
  -6  -3  -2 72.1446 10.5758   1 
  -6  -3  -2 68.1999  5.7211   2 
  -6  -3  -2 70.2461  8.0811  15 
  -7  -3  -2 3.26345 1.95608  15 
  -7  -3  -2 2.62526 3.17450   1 
  -7  -3  -2 3.78301 1.30163   2 
  -8  -3  -2 52.3457  5.2096  15 
  -8   4   2 53.1982  3.5367   7 
  -7   4   2 29.5903  2.7124   6 
  -7   4   2 22.9894  2.0133   4 
  -7   4   2 25.7048  2.3177   7 
  -6   4   2 25.1465  3.0367   6 
  -6   4   2 26.0671  2.6849   7 
  -6   4   2 22.8628  2.2557   4 
  -5   4   2 31.5092  3.4875   6 
  -5   4   2 28.6918  2.4661   4 
  -5   4   2 32.1480  2.8634   7 
  -4   4   2 114.712   9.450   3 
  -3   4   2 174.037  14.519   3 
  -3   4   2 206.559  15.925  12 
   2  -4  -2 90.7942  8.4189   9 
  -2   4   2 116.049   9.092  12 
  -2   4   2 114.241   8.390   3 
   1  -4  -2 1072.95   80.16   9 
  -1   4   2 1021.44   75.79   3 
   0   4   2 77.8598  4.8753   5 
  -1  -4  -2 694.363  61.620   9 
   1   4   2 898.013  47.511   5 
  -2  -4  -2 179.495  14.732   9 
   2   4   2 171.999  10.877   5 
  -3  -4  -2 184.560  15.817   9 
   3   4   2 185.995  11.664   5 
  -4  -4  -2 109.788  10.380   9 
   4   4   2 108.709   7.338   5 
  -5  -4  -2 44.3080  6.5075  15 
  -5  -4  -2 34.9934  3.6395   2 
  -5  -4  -2 39.2017  7.9800   1 
  -6  -4  -2 28.3056  7.5194   1 
  -6  -4  -2 50.5406  4.2078   2 
  -6  -4  -2 53.6147  6.3026  15 
  -7  -4  -2 56.5135  4.4165   2 
  -7  -4  -2 56.4525  6.1853  15 
  -7  -4  -2 44.7540  8.0211   1 
  -7   5   2 35.5400  2.4951   4 
  -7   5   2 33.4368  2.7522   7 
  -7   5   2 34.7747  3.1258   6 
  -6   5   2 107.774   8.239   6 
  -6   5   2 105.725   6.722   4 
  -6   5   2 117.863   7.580   7 
  -5   5   2 34.5546  3.0263   7 
  -5   5   2 34.6430  3.2335   8 
  -5   5   2 32.2395  3.3266   6 
  -5   5   2 27.7595  2.4935   4 
  -4   5   2 54.3519  5.2177   3 
  -3   5   2 45.4422  4.2860   3 
  -3   5   2 43.0206  4.7884  12 
  -2   5   2 391.906  29.330  12 
  -2   5   2 339.817  27.070   3 
   1  -5  -2 448.964  31.809   9 
  -1   5   2 367.609  29.840   3 
   0  -5  -2 253.515  20.278   9 
  -1  -5  -2 448.237  37.529   9 
   1   5   2 504.182  28.649   5 
  -2  -5  -2 190.558  16.075   9 
   2   5   2 190.095  11.841   5 
  -3  -5  -2 39.3150  5.2421   9 
   3   5   2 36.3322  2.9529   5 
   4   5   2 191.026  12.234   5 
  -5  -5  -2 11.0813  1.9800   2 
  -5  -5  -2 8.00801 4.32946   1 
  -5  -5  -2 12.3456  3.4787  15 
  -6  -5  -2 47.2886  5.7627  15 
  -6  -5  -2 30.3488  7.2671   1 
  -6  -5  -2 40.5234  3.7006   2 
  -7  -5  -2 40.0520  7.0233   1 
  -7  -5  -2 39.1312  4.7914  15 
  -7  -5  -2 40.0938  3.3861   2 
  -7   6   2 54.7457  3.4003   4 
  -7   6   2 55.7556  4.1964   6 
  -7   6   2 48.4458  3.7122   7 
  -6   6   2 0.94224 0.78542   7 
  -6   6   2 0.88504 0.95118   6 
  -6   6   2 0.73324 0.69125   4 
  -5   6   2 6.82515 1.21183   4 
  -5   6   2 5.93993 1.57369   8 
  -5   6   2 6.86059 1.69217   6 
  -5   6   2 6.83445 1.40734   7 
  -4   6   2 269.369  16.733   7 
  -4   6   2 271.098  15.152   4 
  -4   6   2 253.432  18.233   6 
  -4   6   2 271.534  16.847   8 
  -3   6   2 223.720  18.043  12 
  -3   6   2 201.703  16.410   3 
  -2   6   2 26.1441  2.8797   3 
  -2   6   2 26.2145  3.2234  12 
   1  -6  -2 818.730  62.004   9 
  -1   6   2 785.281  63.017  12 
   0  -6  -2 158.053  13.263   9 
  -1  -6  -2 516.642  40.757   9 
  -2  -6  -2 56.8306  6.1456   9 
   2   6   2 58.3243  4.1020   5 
  -3  -6  -2 121.716  11.543   9 
   3   6   2 124.151   8.125   5 
  -4  -6  -2 82.5236  6.5075   2 
  -4  -6  -2 82.4443 11.6805   1 
  -4  -6  -2 77.2047  9.1213  15 
  -4  -6  -2 88.4449  5.3180  14 
  -5  -6  -2 33.1233  5.3906  15 
  -5  -6  -2 26.2177  6.7175   1 
  -5  -6  -2 35.5217  3.3766   2 
  -6  -6  -2 17.0232  2.2637   2 
  -6  -6  -2 16.2010  3.4875  15 
  -6  -6  -2 16.8104  5.0494   1 
  -7  -6  -2 24.6154  3.4702  15 
  -7  -6  -2 21.4233  4.6265   1 
  -7  -6  -2 23.4062  2.1738   2 
  -7   7   2 1.33582 0.68973   6 
  -7   7   2 1.14266 0.54691   7 
  -7   7   2 0.92879 0.51328   4 
  -6   7   2 6.05252 1.14359   7 
  -6   7   2 4.95870 0.90743   4 
  -6   7   2 4.54285 1.25636   6 
  -5   7   2 33.7104  2.5503   4 
  -5   7   2 29.8448  2.8326   7 
  -5   7   2 32.0124  3.3562   6 
  -5   7   2 35.2646  3.5284   8 
  -4   7   2 220.225  14.149   8 
  -4   7   2 218.354  13.926   7 
  -4   7   2 213.987  15.332   6 
  -4   7   2 225.468  12.659   4 
  -3   7   2 106.137   7.416   8 
  -3   7   2 106.917   6.899  10 
  -2   7   2 222.291  18.650  12 
  -1   7   2 27.7272  3.4455  12 
   0  -7  -2 728.026  56.810   9 
  -1  -7  -2 67.6116  6.8340   9 
  -3  -7  -2 206.306  13.870   2 
  -3  -7  -2 177.490  18.382  15 
  -3  -7  -2 216.808  23.536   1 
  -3  -7  -2 200.431  11.692  14 
   3   7   2 203.283  12.721   5 
  -4  -7  -2 167.691  11.098   2 
  -4  -7  -2 134.361  18.665   1 
  -4  -7  -2 173.471   9.077  14 
  -4  -7  -2 133.045  14.721  15 
  -5  -7  -2 109.202  13.706   1 
  -5  -7  -2 96.7839  7.3766   2 
  -5  -7  -2 92.3466 10.1024  15 
  -6  -7  -2 6.50833 1.26874   2 
  -6  -7  -2 4.21416 1.91382  15 
  -6  -7  -2 7.76524 3.64681   1 
  -7  -7  -2 6.91486 1.53807  15 
  -6   8   2 35.2234  2.7886   7 
  -6   8   2 36.9151  2.5337   4 
  -6   8   2 38.6669  3.2704   6 
  -5   8   2 86.0973  6.6809   6 
  -5   8   2 86.2132  5.8630   7 
  -5   8   2 81.8529  5.2765   4 
  -5   8   2 89.6186  6.2186   8 
  -4   8   2 6.68286 1.59309   8 
  -4   8   2 7.90901 1.37202   7 
  -4   8   2 7.67356 1.72887   6 
  -4   8   2 7.93698 1.21014   4 
  -3   8   2 240.930  13.357   4 
  -3   8   2 237.632  16.311   6 
  -3   8   2 232.244  14.351  10 
  -3   8   2 224.837  14.918   8 
  -2   8   2 231.070  15.031   8 
  -2   8   2 254.868  14.971  10 
  -2   8   2 225.266  16.328   6 
   1  -8  -2 233.119  25.929   1 
  -1   8   2 237.249  14.905   8 
  -1   8   2 237.255  15.011  10 
   0  -8  -2 8.71022 3.24158   1 
   0   8   2 4.72050 1.25364   8 
  -1  -8  -2 162.463  19.151   1 
   1   8   2 166.455  10.581   8 
  -2  -8  -2 251.191  28.536   1 
   2   8   2 258.003  15.797   8 
  -3  -8  -2 92.5730 11.8541   1 
  -3  -8  -2 77.8679  6.2525   2 
  -3  -8  -2 83.6859  5.6114  14 
  -4  -8  -2 72.3344  8.6645  15 
  -4  -8  -2 77.9508 11.4916   1 
  -4  -8  -2 80.4980  5.1576  14 
  -4  -8  -2 93.4964  6.4137   2 
  -5  -8  -2 17.6083  2.2213   2 
  -5  -8  -2 17.0477  4.8331   1 
  -5  -8  -2 23.6314  3.8490  15 
  -6  -8  -2 24.9092  3.3941  15 
  -6  -8  -2 31.3907  2.5102   2 
  -6  -8  -2 24.9485  4.9401   1 
  -6   9   2 3.76378 0.89500   6 
  -6   9   2 4.11432 0.70221   7 
  -6   9   2 4.58840 0.67703   4 
  -5   9   2 14.7287  1.9675   8 
  -5   9   2 17.2571  1.7062   7 
  -5   9   2 18.7167  2.2676   6 
  -5   9   2 14.7537  1.4865   4 
  -4   9   2 11.9300  1.3944   4 
  -4   9   2 13.8732  2.0745   8 
  -4   9   2 12.0279  1.9983   6 
  -3   9   2 13.4105  1.5341   4 
  -3   9   2 15.8095  2.2345   8 
  -3   9   2 12.6793  2.1930   6 
  -2   9   2 328.328  20.084   8 
  -2   9   2 314.257  19.839  10 
   1  -9  -2 159.094  19.124   1 
  -1   9   2 174.863  11.043   8 
   0  -9  -2 296.045  29.265   1 
   0   9   2 235.821  16.365   8 
  -1  -9  -2 146.215  16.209   1 
   1   9   2 119.740   8.588   8 
  -2  -9  -2 308.178  34.671   1 
   2   9   2 321.273  19.411   8 
  -3  -9  -2 41.7483  3.8163  14 
  -4  -9  -2 14.7729  4.4716   1 
  -4  -9  -2 20.0416  2.2074   2 
  -4  -9  -2 18.5732  3.5205  15 
  -4  -9  -2 16.6540  1.7261  14 
  -5  -9  -2 29.7638  5.5453   1 
  -5  -9  -2 27.3283  3.5834  15 
  -5  -9  -2 27.4035  2.4977   2 
  -5  10   2 22.3166  1.6431   4 
  -5  10   2 25.1399  2.2846   6 
  -4  10   2 44.8652  3.0768   4 
  -4  10   2 53.9092  4.1756   6 
  -4  10   2 48.3639  3.8703   8 
  -3  10   2 69.1910  5.4711   6 
  -3  10   2 66.6641  5.1869   8 
  -2  10   2 72.3477  5.2031  10 
  -2  10   2 73.6940  5.5664   8 
   1 -10  -2 39.8336  6.3723   1 
  -1  10   2 37.8021  3.3914   8 
  -1  10   2 33.9960  3.2721  10 
   0 -10  -2 -0.5692  2.4687   1 
   0  10   2 0.38488 0.91251   8 
  -1 -10  -2 15.3531  4.1088   1 
   1  10   2 11.3734  1.7292   8 
  -2 -10  -2 3.63261 1.28186  14 
  -2 -10  -2 3.87477 2.95165   1 
   2  10   2 4.05427 1.13994   8 
  -3 -10  -2 49.0909  3.5349  14 
  -3 -10  -2 49.4604  7.6270   1 
  -4 -10  -2 29.1720  5.4899   1 
  -5 -10  -2 20.2276  3.8097   1 
  -4  11   2 84.6539  5.3781   8 
  -4  11   2 73.7337  5.6175   6 
  -3  11   2 60.0245  4.5045   8 
  -2  11   2 52.7326  4.1319   8 
  -2  11   2 50.1978  3.6303  10 
   1 -11  -2 29.4015  2.6339  13 
   1 -11  -2 31.5897  5.4979   1 
  -1  11   2 26.9648  2.6327  10 
  -1  11   2 28.5761  2.7633   8 
   0 -11  -2 38.2713  6.1445   1 
   0  11   2 25.6601  2.7869   8 
   0  11   2 26.1746  2.8900  10 
  -1 -11  -2 21.4290  4.8731   1 
   1  11   2 26.3983  2.4071   8 
  -2 -11  -2 23.4216  4.7993   1 
  -2 -11  -2 23.5110  2.4303  14 
   2  11   2 22.4370  2.1501   8 
  -3 -11  -2 91.5382 10.9670   1 
  -3 -11  -2 86.7404  5.2347  14 
  -4 -11  -2 51.8736  6.7249   1 
  -2  12   2 35.8577  2.9082   8 
  -1  12   2 15.3307  1.6006  10 
  -1  12   2 14.3433  1.7443   8 
   0 -12  -2 43.6423  5.5990   1 
   0  12   2 33.7528  2.7725   8 
   0  12   2 29.5831  2.7234  10 
  -1 -12  -2 9.94950 2.77148   1 
   1  12   2 7.76207 1.16577   8 
  -2 -12  -2 39.9828  5.6661   1 
  -2 -12  -2 40.3197  2.7747  14 
   1  14  -3 36.7298  2.6686   8 
  -1 -14   3 30.2955  4.9909   1 
  -1 -14   3 39.6277  2.7916  14 
   0  14  -3 6.09264 1.03558  10 
   0  14  -3 6.67765 1.04877   8 
   0 -14   3 3.72984 2.06707   1 
  -1  14  -3 21.3714  1.9452   8 
  -1  14  -3 21.2221  1.7719  10 
  -2  14  -3 40.4715  3.0335   6 
   2 -14   3 33.3164  5.0229   1 
   3  13  -3 12.3278  1.3266   8 
  -3 -13   3 11.8627  1.2176  14 
  -3 -13   3 9.95420 2.89941   1 
  -3 -13   3 17.0425  2.6475  15 
   2  13  -3 60.5681  4.1326   8 
  -2 -13   3 55.7593  7.8396   1 
   1  13  -3 48.7125  3.5430   8 
  -1 -13   3 41.9782  6.6431   1 
   0  13  -3 -0.1855  0.8609  10 
   0  13  -3 -0.5436  0.6651   8 
   0 -13   3 0.71848 2.01887   1 
  -1  13  -3 52.1235  4.2371  10 
  -1  13  -3 61.1075  4.3921   8 
  -1  13  -3 52.0177  4.6201   6 
   1 -13   3 74.2575  8.3496   1 
  -2  13  -3 50.3265  4.4408   6 
  -2  13  -3 55.2971  3.7956  10 
   2 -13   3 58.0459  7.4974   1 
  -3  13  -3 23.9667  2.3102   6 
   3 -13   3 15.2965  3.4924   1 
  -4  13  -3 1.17245 0.74462   6 
   4  12  -3 1.41992 0.59696   8 
  -4 -12   3 2.10648 1.51871  15 
   3  12  -3 48.1026  3.3796   8 
  -3 -12   3 40.5947  5.4136  15 
  -3 -12   3 44.5041  6.8543   1 
   2  12  -3 11.6762  1.5207   8 
  -2 -12   3 8.82468 3.46658   1 
  -2 -12   3 12.8726  3.2134  15 
   1  12  -3 56.2219  3.9625   8 
  -1 -12   3 41.9267  7.2893   1 
   0  12  -3 46.7043  3.7597   8 
   0  12  -3 42.0548  4.0710   6 
   0 -12   3 51.6107  7.2890   1 
  -1  12  -3 40.9773  3.6024  10 
  -1  12  -3 39.5395  3.5385   8 
  -1  12  -3 39.1271  3.9161   6 
   1 -12   3 51.1940  6.9781   1 
  -2  12  -3 33.8100  2.9999   8 
  -2  12  -3 35.1912  3.4580   6 
  -2  12  -3 29.7181  2.7907  10 
   2 -12   3 28.6563  5.5383   1 
   3 -12   3 52.9766  7.4574   1 
  -4  12  -3 9.19738 1.64767   6 
   4 -12   3 4.77447 2.25028   1 
  -5  12  -3 35.9968  3.0526   6 
   5  11  -3 16.2038  1.4572   8 
  -5 -11   3 14.1458  2.8054  15 
  -5 -11   3 16.9883  1.8206   2 
   4  11  -3 9.83852 1.33854   8 
  -4 -11   3 10.7772  2.8297  15 
   3  11  -3 42.5772  3.2325   8 
  -3 -11   3 39.3666  7.1330   1 
  -3 -11   3 37.9114  5.8846  15 
   2  11  -3 8.17484 1.37324   8 
  -2 -11   3 8.74251 3.57955   1 
  -2 -11   3 8.67900 2.91990  15 
   1  11  -3 120.440   7.371   8 
  -1 -11   3 93.0355 13.1961   1 
   0  11  -3 42.2247  4.3354   6 
   0  11  -3 48.9228  3.9385   8 
   0 -11   3 59.1417  7.7831   1 
  -1  11  -3 133.555  10.186   6 
  -1  11  -3 141.531   9.226   8 
  -2  11  -3 6.42256 1.50268   8 
  -2  11  -3 5.59295 1.74614   6 
  -2  11  -3 7.76237 1.55713  10 
   2 -11   3 7.67690 3.14164   1 
  -3  11  -3 10.5156  1.2951  10 
  -3  11  -3 8.98415 1.94905   6 
   3 -11   3 3.40365 2.66479   1 
  -4  11  -3 2.83872 1.27596   6 
   4 -11   3 0.33204 2.05002   1 
  -5  11  -3 2.66024 1.10726   6 
  -5  11  -3 2.70448 0.82563   7 
   5 -11   3 1.23450 1.84575   1 
  -6 -10   3 58.8898  6.1902  15 
  -6 -10   3 59.7791  4.4151   2 
  -5 -10   3 23.9939  2.4715   2 
  -5 -10   3 20.0804  3.8878  15 
  -4 -10   3 12.4133  2.1009   2 
  -4 -10   3 11.9101  3.2826  15 
  -3 -10   3 66.2632  7.3281  15 
  -3 -10   3 48.9046  8.6074   1 
  -2 -10   3 113.078  14.109   1 
  -2 -10   3 110.241  11.369  15 
   1  10  -3 19.1085  2.0879   8 
  -1 -10   3 18.1098  3.6529  15 
  -1 -10   3 15.7355  4.4303   1 
   0  10  -3 5.47511 1.59254   6 
   0  10  -3 5.41132 1.24276   8 
   0 -10   3 8.91317 3.20707   1 
  -1  10  -3 55.2291  4.2819   8 
  -1  10  -3 57.7119  5.0067   6 
   1 -10   3 53.4381  7.8325   1 
  -2  10  -3 125.910  10.132   6 
  -2  10  -3 129.026   9.146  10 
   2 -10   3 160.122  16.611   1 
  -3  10  -3 103.470   6.513  10 
  -3  10  -3 113.324   7.950   6 
   3 -10   3 74.7407 11.8839   1 
  -4  10  -3 44.8083  4.2075   6 
  -4  10  -3 52.4275  3.7307   7 
   4 -10   3 29.6631  6.5149   1 
  -5  10  -3 15.3261  2.3612   6 
  -5  10  -3 16.3358  1.6267   4 
  -5  10  -3 19.0926  2.1201   7 
  -6  10  -3 99.0327  6.0868   7 
  -6  10  -3 87.0674  6.5222   6 
  -6  10  -3 85.2770  5.2950   4 
  -6  -9   3 33.6443  2.8025   2 
  -6  -9   3 19.5943  3.8391  15 
  -5  -9   3 19.2911  4.1628  15 
  -5  -9   3 23.3523  2.8661   2 
  -4  -9   3 26.8528  2.3787  11 
  -4  -9   3 27.9431  5.1648  15 
  -4  -9   3 29.9911  3.4425   2 
  -3  -9   3 7.18957 2.81159  15 
  -3  -9   3 3.89108 3.72745   1 
  -3  -9   3 7.84196 1.24246  11 
   0  -9   3 416.367  33.092   9 
   1  -9   3 102.224   9.041   9 
  -3   9  -3 135.878   8.705  10 
  -3   9  -3 136.976  15.250   1 
  -3   9  -3 129.637   9.987   6 
  -4   9  -3 21.3017  4.2539   1 
  -4   9  -3 27.0805  2.9266   7 
  -4   9  -3 26.5577  2.2288   4 
  -4   9  -3 31.5488  3.5253   6 
  -5   9  -3 96.8867 10.9004   1 
  -5   9  -3 91.1407  5.7194   4 
  -5   9  -3 87.5856  7.1718   6 
  -5   9  -3 90.2819  6.5834   7 
  -6   9  -3 40.0029  3.2740   7 
  -6   9  -3 38.3914  5.2667   1 
  -6   9  -3 37.3190  2.7565   4 
  -6   9  -3 39.7867  3.5491   6 
  -7   9  -3 33.3848  2.5600   7 
  -7   9  -3 34.5798  2.2866   4 
  -7  -8   3 36.5137  3.0805   2 
  -7  -8   3 38.2446  4.3364  15 
  -6  -8   3 12.6285  1.9754   2 
  -6  -8   3 8.50940 2.84873  15 
  -5  -8   3 142.918   8.373  11 
  -5  -8   3 112.175  13.076  15 
  -5  -8   3 128.224   9.728   2 
  -4  -8   3 64.6870  4.6278  11 
  -4  -8   3 69.0941  4.6698   8 
  -4  -8   3 67.1784  8.0683  15 
  -4  -8   3 64.1054  5.7201   2 
  -3  -8   3 124.450   7.780  11 
  -3  -8   3 116.392   8.504   5 
  -3  -8   3 126.484   7.926   8 
  -2  -8   3 119.487   7.553  11 
  -2  -8   3 124.614  11.059   9 
  -1  -8   3 1.50701 1.26590   9 
   0  -8   3 73.6880  6.7446   9 
  -1   8  -3 30.3625  3.0535   3 
   1  -8   3 22.4998  2.7908   9 
  -2   8  -3 251.594  18.819   3 
   2  -8   3 235.417  19.438   9 
  -3   8  -3 10.1414  2.1890   3 
   3  -8   3 9.08393 1.84541   9 
  -4   8  -3 73.7690  4.8533   4 
  -4   8  -3 77.0421  5.6436   7 
  -4   8  -3 66.8887  5.9956   6 
  -4   8  -3 76.7010  9.1570   1 
  -5   8  -3 120.675   7.441   4 
  -5   8  -3 118.023   9.090   6 
  -5   8  -3 123.567   8.473   7 
  -5   8  -3 121.005  13.816   1 
  -6   8  -3 8.58922 2.44521   1 
  -6   8  -3 5.96315 1.14583   4 
  -6   8  -3 4.90686 1.31681   7 
  -7   8  -3 52.0716  3.4140   4 
  -7   8  -3 51.6481  3.7997   7 
  -7  -7   3 82.8531  8.4694  15 
  -7  -7   3 88.9108  6.4387   2 
  -6  -7   3 8.93762 1.88999   2 
  -6  -7   3 8.17506 2.94535  15 
  -5  -7   3 37.0506  3.9849   2 
  -5  -7   3 42.1159  3.0685   8 
  -5  -7   3 40.0130  3.1572  11 
  -5  -7   3 31.3376  5.8366  15 
  -4  -7   3 0.45015 1.15780   5 
  -4  -7   3 1.00187 1.36158   2 
  -4  -7   3 0.50687 0.64651   8 
  -4  -7   3 0.36591 0.64358  11 
  -3  -7   3 144.606   8.869  11 
  -3  -7   3 144.951   9.681   5 
  -3  -7   3 137.828  12.624   9 
  -2  -7   3 190.641  16.274   9 
  -2  -7   3 198.895  11.688  11 
  -2  -7   3 192.314  12.441   5 
  -1  -7   3 508.566  41.762   9 
  -1  -7   3 558.435  30.903  11 
   0   7  -3 477.893  38.493   3 
   0  -7   3 575.197  40.886   9 
  -1   7  -3 480.362  38.715   3 
   1  -7   3 571.712  40.842   9 
  -2   7  -3 260.446  18.572   3 
   2  -7   3 225.436  19.118   9 
  -3   7  -3 124.130  10.167   3 
   3  -7   3 121.965  10.313   9 
  -4   7  -3 44.8292  4.6931   3 
  -5   7  -3 34.9466  2.8871   4 
  -5   7  -3 34.0127  3.3051   7 
  -5   7  -3 33.4699  5.1908   1 
  -6   7  -3 190.291  18.888   1 
  -6   7  -3 150.506  11.079   7 
  -6   7  -3 167.160  10.122   4 
  -7   7  -3 39.2055  2.7509   4 
  -7   7  -3 33.5658  2.9620   7 
  -7  -6   3 21.7360  2.6810   2 
  -6  -6   3 296.705  16.907  11 
  -6  -6   3 297.077  19.459   2 
  -6  -6   3 243.443  25.073  15 
  -5  -6   3 5.32917 2.72676  15 
  -5  -6   3 5.01213 1.06319   8 
  -5  -6   3 5.95139 1.20040  11 
  -5  -6   3 4.90959 1.79334   2 
  -4  -6   3 344.719  19.507  11 
  -4  -6   3 307.802  20.597   5 
  -3  -6   3 125.489   8.528   5 
  -3  -6   3 129.223   7.820  11 
  -3  -6   3 119.097  10.934   9 
  -2  -6   3 32.4236  3.7901   9 
  -2  -6   3 34.3384  2.5186  11 
  -2  -6   3 35.1460  2.9204   5 
   1   6  -3 385.285  24.796   3 
  -1  -6   3 308.684  19.519  11 
  -1  -6   3 314.244  26.433   9 
   0   6  -3 524.062  40.468   3 
   0  -6   3 585.343  42.820   9 
  -1   6  -3 448.302  35.117   3 
   1  -6   3 506.726  36.984   9 
  -2   6  -3 368.202  26.090   3 
   2  -6   3 331.463  27.164   9 
  -3   6  -3 394.095  29.171   3 
   3  -6   3 385.588  30.438   9 
  -4   6  -3 462.748  35.322   3 
   4  -6   3 482.122  36.958   9 
  -5   6  -3 16.1430  3.6828   1 
  -5   6  -3 13.9271  2.1768   7 
  -5   6  -3 16.9400  2.0841   4 
  -6   6  -3 203.901  24.886   1 
  -6   6  -3 233.355  14.885   7 
  -6   6  -3 260.979  13.670   4 
  -7   6  -3 48.5460  3.4395   4 
  -7   6  -3 47.2445  3.7562   7 
  -8   6  -3 12.3970  1.2112   4 
  -7  -5   3 89.6014  6.9469   2 
  -6  -5   3 55.2366  4.0205  11 
  -6  -5   3 54.3281  5.0294   2 
  -5  -5   3 119.525   8.326   5 
  -5  -5   3 110.275   8.910   2 
  -5  -5   3 119.433   7.556   8 
  -5  -5   3 112.311   7.454  11 
  -4  -5   3 16.9027  1.8580  11 
  -4  -5   3 14.8031  2.1898   5 
  -3  -5   3 305.119  17.764  11 
  -3  -5   3 309.697  18.825   5 
  -3  -5   3 288.943  24.058   9 
   2   5  -3 1528.02  101.00   3 
  -2  -5   3 1348.37   83.26   5 
  -2  -5   3 1353.84  107.31   9 
  -2  -5   3 1366.68   80.11  11 
   1   5  -3 135.998   9.128   3 
  -1  -5   3 126.419   7.725   5 
  -1  -5   3 108.424   7.173  11 
  -1  -5   3 108.254   9.769   9 
   0   5  -3 1115.54   87.10   3 
   0  -5   3 1190.30   71.41   5 
   0  -5   3 1311.73   92.12   9 
  -1   5  -3 43.0098  3.7838   3 
  -2   5  -3 899.082  62.956   3 
   2  -5   3 831.627  66.237   9 
  -3   5  -3 388.767  29.094   3 
   3  -5   3 393.383  30.482   9 
  -4   5  -3 231.953  18.570   3 
   4  -5   3 251.516  19.394   9 
  -5   5  -3 338.191  35.865   1 
  -6   5  -3 207.036  14.308   7 
  -6   5  -3 227.158  24.564   1 
  -6   5  -3 238.299  13.237   4 
  -7   5  -3 83.7492  9.9296   1 
  -7   5  -3 81.2878  5.2552   4 
  -7   5  -3 76.3569  5.6763   7 
  -8   5  -3 5.80031 0.90142   4 
  -7  -4   3 49.0796  4.4523   2 
  -6  -4   3 101.168   6.782  11 
  -6  -4   3 110.412   8.343   2 
  -5  -4   3 477.081  27.022  11 
  -5  -4   3 440.029  28.465   5 
  -4  -4   3 318.627  20.256   5 
  -4  -4   3 328.176  19.139  11 
  -3  -4   3 238.804  14.690   5 
  -3  -4   3 228.096  13.801  11 
   2   4  -3 1269.64   89.82   3 
  -2  -4   3 1217.19   71.27  11 
  -2  -4   3 1261.68   74.12   5 
  -2  -4   3 1236.84   95.38   9 
   1   4  -3 429.054  27.359   3 
  -1  -4   3 321.362  28.983   9 
   0   4  -3 87.3731  7.0484   3 
   0  -4   3 91.2801  5.7971   5 
   0  -4   3 97.4638  7.4108   9 
   1  -4   3 606.430  46.451   9 
  -2   4  -3 2250.30  157.36   3 
   2  -4   3 2113.11  166.18   9 
  -3   4  -3 236.664  17.894   3 
   3  -4   3 237.899  18.749   9 
  -4   4  -3 109.975   8.863   3 
   4  -4   3 106.897   9.153   9 
   5  -4   3 373.840  29.573   9 
  -6   4  -3 40.4724  3.7997   7 
  -6   4  -3 52.6917  7.2241   1 
  -6   4  -3 48.8677  3.6864   4 
  -7   4  -3 192.556  20.528   1 
  -7   4  -3 175.158  10.748   4 
  -8   4  -3 7.80980 1.00895   4 
  -6  -3   3 220.932  15.680   2 
  -5  -3   3 10.0248  1.9173   5 
  -5  -3   3 10.4405  1.4328  11 
  -4  -3   3 184.223  11.972   5 
  -4  -3   3 184.777  11.134  11 
   3   3  -3 134.363  10.127   3 
  -3  -3   3 143.056   8.913   5 
  -3  -3   3 132.499   8.216  11 
   2   3  -3 977.653  68.981   3 
  -2  -3   3 953.796  56.938   5 
  -2  -3   3 936.937  54.732  11 
  -2  -3   3 956.416  73.172   9 
   1   3  -3 555.568  39.933   3 
  -1  -3   3 593.987  32.988   5 
  -1  -3   3 510.052  42.275   9 
   0   3  -3 109.839   8.224   3 
   0  -3   3 113.502   8.639   9 
   0  -3   3 106.351   6.764   5 
  -1   3  -3 431.877  27.974   3 
   1  -3   3 338.497  22.714   5 
  -2   3  -3 450.326  31.189   3 
   2  -3   3 402.665  32.849   9 
  -3   3  -3 102.572   7.755   3 
   3  -3   3 92.6787  8.1028   9 
  -4   3  -3 40.6213  3.7369   3 
   4  -3   3 36.8130  3.8478   9 
   5  -3   3 305.756  24.453   9 
  -6   3  -3 187.280  20.624   1 
  -6   3  -3 171.401  10.709   4 
  -7   3  -3 13.6581  1.6757   4 
  -7   3  -3 12.9705  3.9242   1 
  -5  -2   3 194.741  12.241   5 
  -5  -2   3 177.484  11.133  11 
   4   2  -3 731.499  52.800   3 
  -4  -2   3 678.122  41.864  11 
  -4  -2   3 779.076  43.967   5 
   3   2  -3 66.1129  4.8995   3 
  -3  -2   3 58.7885  3.9413  11 
  -3  -2   3 59.4901  4.4152   5 
   2   2  -3 1162.66   82.64   3 
  -2  -2   3 1129.29   68.03   5 
   1   2  -3 3525.05  250.38   3 
  -1  -2   3 3440.97  264.85   9 
   0   2  -3 6.24964 1.10528   3 
   0  -2   3 6.61056 0.95890   5 
   0  -2   3 6.20214 1.09890   9 
  -1   2  -3 4581.06  299.55   3 
   1  -2   3 3887.84  316.64   9 
   1  -2   3 4020.92  245.45   5 
  -2   2  -3 1395.23  101.89   9 
  -2   2  -3 1431.67   96.19   3 
   2  -2   3 1263.91   78.67   5 
   2  -2   3 1243.56  101.69   9 
  -3   2  -3 11.4884  1.5703   3 
  -3   2  -3 11.0760  1.8460   9 
   3  -2   3 12.0553  1.7758   9 
   3  -2   3 10.8949  0.9544   5 
   4  -2   3 946.756  72.905   9 
   5  -2   3 10.3300  2.1666   9 
  -6   2  -3 8.36685 1.57462   4 
  -6   2  -3 13.4732  4.2733   1 
  -7   2  -3 41.3751  6.8058   1 
   5   1  -3 426.726  31.471   3 
   4   1  -3 301.813  22.325   3 
  -4  -1   3 301.782  18.767   5 
   3   1  -3 114.413   8.911   3 
  -3  -1   3 129.438   9.047   3 
  -3  -1   3 119.108   7.654   5 
  -3  -1   3 108.157   7.017  11 
   2   1  -3 342.044  24.594   3 
  -2  -1   3 332.384  20.354   5 
   1   1  -3 1779.78  122.88   3 
  -1  -1   3 1634.23  100.83   5 
   0   1  -3 13.7835  1.5331   3 
   0  -1   3 11.7045  1.5564   9 
   0  -1   3 13.0698  1.3033   5 
   0  -1   3 11.1304  1.6773  12 
  -1   1  -3 1259.73   87.38   3 
  -1   1  -3 1154.81   92.54   9 
   1  -1   3 1111.49   93.82  12 
   1  -1   3 1328.47   71.65   5 
  -2   1  -3 258.209  21.051   9 
  -2   1  -3 297.329  19.698   3 
   2  -1   3 250.721  16.072   5 
  -3   1  -3 319.200  24.263   9 
   3  -1   3 295.901  18.384   5 
  -4   1  -3 517.706  38.568   9 
   4  -1   3 465.646  29.252   5 
  -5   1  -3 516.508  38.002   9 
   5  -1   3 438.414  37.325   9 
  -6   1  -3 47.8321  8.5830   1 
  -6   1  -3 46.4483  5.5021  15 
  -7   1  -3 37.7674  7.0379   1 
   5   0  -3 96.1545  7.8286   3 
  -4   0   3 314.011  23.359   3 
  -3   0   3 839.269  52.628   5 
  -3   0   3 925.642  64.058   3 
  -2   0   3 123.138   6.928   5 
  -2   0   3 96.3634  8.2235   3 
  -1   0   3 2387.36  173.64   3 
  -1   0   3 2394.75  186.84  12 
  -1   0   3 2454.41  142.41   5 
   0   0  -3 134.038   9.472   3 
   0   0  -3 130.575  10.051   9 
   0   0   3 115.421  10.237  12 
   0   0   3 133.278   7.821   5 
  -1   0  -3 2333.73  171.02   3 
  -1   0  -3 2337.77  181.12   9 
   1   0   3 2461.36  140.32   5 
  -2   0  -3 203.735  16.654   9 
   2   0   3 214.261  12.682   5 
  -3   0  -3 624.892  48.710   9 
   3   0   3 629.352  37.378   5 
  -4   0  -3 137.165  11.505   9 
   4   0   3 127.542   8.299   5 
  -5   0  -3 25.7863  4.0219   9 
  -6   0  -3 21.3421  5.7695   1 
  -7   0  -3 104.063   9.392  15 
  -7   0  -3 81.5237 12.0710   1 
  -6   1   3 1.59982 1.04175   6 
  -6   1   3 1.75047 0.88588   7 
  -5   1   3 85.5565  7.2320   3 
  -4   1   3 231.418  17.523   3 
  -3   1   3 148.135  11.367   3 
  -2   1   3 148.687  10.949   3 
  -2   1   3 148.758  11.903  12 
  -2   1   3 137.590   8.961   5 
   1  -1  -3 1592.62  128.23   9 
  -1   1   3 1664.34  121.46   3 
  -1   1   3 1803.41   99.60   5 
   0  -1  -3 7649.60  565.48   9 
   0  -1  -3 7401.27  534.70   3 
   0   1   3 7262.82  438.49   5 
  -1  -1  -3 1374.64  110.27   9 
   1   1   3 1513.75   85.36   5 
  -2  -1  -3 497.396  38.598   9 
   2   1   3 495.860  29.628   5 
  -3  -1  -3 159.946  12.924   9 
   3   1   3 148.185   9.521   5 
  -4  -1  -3 144.300  12.551   9 
   4   1   3 142.642   9.124   5 
  -5  -1  -3 9.85455 2.72748   9 
   5   1   3 13.8220  1.6772   5 
  -6  -1  -3 8.85592 4.48547   1 
  -6  -1  -3 23.9950  3.9344  15 
  -7  -1  -3 135.255  13.751  15 
  -7  -1  -3 170.438  18.369   1 
  -7   2   3 190.057  12.220   7 
  -7   2   3 201.249  13.392   6 
  -6   2   3 7.06466 1.33699   7 
  -6   2   3 7.61863 1.60265   6 
  -5   2   3 4.09671 1.36350   3 
  -4   2   3 169.308  13.172   3 
  -3   2   3 56.4200  4.8516   3 
  -2   2   3 1926.57  146.56  12 
  -2   2   3 1848.00  136.12   3 
   1  -2  -3 272.490  19.764   9 
  -1   2   3 237.984  18.722   3 
  -1   2   3 247.000  20.246  12 
  -1   2   3 260.650  15.325   5 
   0  -2  -3 6.71823 1.15958   9 
   0   2   3 5.36552 0.65859   5 
   0   2   3 5.35315 0.76879   3 
  -1  -2  -3 334.450  27.452   9 
   1   2   3 366.667  21.049   5 
  -2  -2  -3 1179.87   91.29   9 
   2   2   3 1195.12   70.39   5 
  -3  -2  -3 50.4314  5.1547   9 
   3   2   3 48.0782  3.4783   5 
  -4  -2  -3 86.7591  8.4518   9 
   4   2   3 87.0045  5.8981   5 
   5   2   3 0.51996 0.75542   5 
  -6  -2  -3 100.654   7.683   2 
  -6  -2  -3 101.612  10.542  15 
  -7  -2  -3 58.8246  6.2867  15 
  -7  -2  -3 47.5055  8.2209   1 
  -8  -2  -3 13.5753  2.2266  15 
  -7   3   3 1.36833 0.73918   7 
  -7   3   3 1.09741 0.94704   6 
  -6   3   3 155.660   9.139   4 
  -6   3   3 153.855  11.082   6 
  -6   3   3 156.335  10.130   7 
  -5   3   3 6.73959 1.57110   8 
  -4   3   3 60.6609  5.4721   3 
  -3   3   3 757.599  55.346   3 
  -2   3   3 53.9902  5.1758  12 
  -2   3   3 56.0999  4.6882   3 
   1  -3  -3 852.006  63.881   9 
  -1   3   3 829.999  65.102  12 
  -1   3   3 809.031  60.391   3 
  -1   3   3 842.672  49.421   5 
   0  -3  -3 18.3324  2.0113   9 
   0   3   3 12.2679  1.1252   5 
  -1  -3  -3 571.426  47.447   9 
   1   3   3 649.261  36.471   5 
  -2  -3  -3 16.7811  2.7491   9 
   2   3   3 15.7144  1.4634   5 
  -3  -3  -3 837.928  65.167   9 
   3   3   3 832.431  49.858   5 
  -4  -3  -3 138.409  12.398   9 
   4   3   3 133.054   8.802   5 
  -5  -3  -3 26.8653  4.8605  15 
  -5  -3  -3 20.5659  2.7928   2 
  -5  -3  -3 28.5617  6.6652   1 
   5   3   3 23.8134  2.5770   5 
  -6  -3  -3 40.5569  3.7959   2 
  -6  -3  -3 39.9089  5.9557  15 
  -7  -3  -3 17.6473  5.1152   1 
  -7  -3  -3 26.1303  3.9835  15 
  -7  -3  -3 22.2997  2.4908   2 
  -8  -3  -3 45.6672  4.5785  15 
  -7   4   3 35.1288  3.0497   6 
  -7   4   3 31.8353  2.3518   4 
  -7   4   3 32.3689  2.6508   7 
  -6   4   3 16.1519  2.3827   6 
  -6   4   3 23.8738  2.1347   4 
  -6   4   3 19.2275  2.2062   7 
  -5   4   3 8.41804 1.27194   4 
  -5   4   3 7.89540 1.46376   7 
  -5   4   3 7.18435 1.67899   8 
  -5   4   3 9.73281 1.87318   6 
  -4   4   3 75.2868  6.6268   3 
  -3   4   3 471.206  36.581   3 
  -3   4   3 521.594  39.728  12 
  -2   4   3 118.423   9.887   3 
  -2   4   3 136.811  10.950  12 
  -1   4   3 75.8864  6.3870   3 
  -1   4   3 86.1214  7.1434  12 
   0  -4  -3 478.577  33.473   9 
   0   4   3 383.224  25.441   5 
  -1  -4  -3 71.1434  7.1358   9 
   1   4   3 84.0170  5.1378   5 
  -2  -4  -3 151.049  12.598   9 
   2   4   3 139.809   9.087   5 
  -3  -4  -3 317.066  25.921   9 
   3   4   3 313.329  19.310   5 
   4   4   3 115.662   7.743   5 
  -5  -4  -3 5.80020 3.96521   1 
  -5  -4  -3 7.69662 2.87003  15 
  -5  -4  -3 4.94664 1.45874   2 
  -6  -4  -3 21.4984  5.8407   1 
  -6  -4  -3 20.4322  2.5626   2 
  -6  -4  -3 17.1096  3.7499  15 
  -7  -4  -3 18.5674  3.2541  15 
  -7  -4  -3 17.1255  2.0780   2 
  -7  -4  -3 15.8977  4.5762   1 
  -7   5   3 15.6036  1.4643   4 
  -7   5   3 17.7433  1.9781   6 
  -7   5   3 12.4946  1.5077   7 
  -6   5   3 8.42864 1.20339   4 
  -6   5   3 5.03748 1.15781   7 
  -6   5   3 7.69807 1.56847   6 
  -5   5   3 122.738   7.877   7 
  -5   5   3 113.209   8.639   6 
  -5   5   3 116.705   7.046   4 
  -5   5   3 106.628   7.980   8 
  -4   5   3 360.458  22.281   8 
  -3   5   3 118.329  10.084   3 
  -3   5   3 133.363  11.296  12 
  -2   5   3 614.490  46.428   3 
  -2   5   3 654.344  50.248  12 
  -1   5   3 143.171  12.107  12 
   0  -5  -3 122.223  10.479   9 
  -1  -5  -3 127.640  13.070   9 
   1   5   3 179.118   9.802   5 
  -2  -5  -3 552.541  44.852   9 
   2   5   3 578.882  34.066   5 
  -3  -5  -3 84.4479  8.6408   9 
   3   5   3 86.6560  5.8956   5 
  -4  -5  -3 301.881  16.301  14 
  -4  -5  -3 298.878  20.063   2 
  -4  -5  -3 294.785  26.583  15 
   4   5   3 290.420  18.432   5 
  -5  -5  -3 223.228  14.835   2 
  -5  -5  -3 211.200  25.091   1 
  -5  -5  -3 200.195  19.670  15 
  -6  -5  -3 7.30122 2.50614  15 
  -6  -5  -3 5.49896 3.80301   1 
  -6  -5  -3 10.5537  1.7282   2 
  -7  -5  -3 45.2968  3.5124   2 
  -7  -5  -3 45.4981  4.8852  15 
  -7  -5  -3 37.0132  6.5792   1 
  -7   6   3 27.8045  2.0122   4 
  -7   6   3 30.3982  2.2542   7 
  -7   6   3 27.4630  2.5014   6 
  -6   6   3 18.5008  2.3997   6 
  -6   6   3 22.3801  2.0744   7 
  -6   6   3 21.0571  1.8076   4 
  -5   6   3 77.0865  6.5790   6 
  -5   6   3 88.8558  5.9871   7 
  -5   6   3 87.9838  5.3754   4 
  -5   6   3 82.8872  6.2324   8 
  -4   6   3 7.62245 1.65239   8 
  -4   6   3 7.15272 1.19023   4 
  -4   6   3 6.85658 1.67298   6 
  -4   6   3 6.94583 1.38803   7 
  -3   6   3 313.067  23.963   3 
  -3   6   3 320.495  19.671   8 
  -2   6   3 114.729  10.311  12 
  -1   6   3 14.8871  2.5428  12 
   0  -6  -3 28.4366  3.5701   9 
  -1  -6  -3 25.0622  3.8361   9 
  -2  -6  -3 105.435  10.127   9 
   2   6   3 108.532   7.069   5 
  -3  -6  -3 354.634  39.028   1 
  -3  -6  -3 340.839  23.709   2 
  -3  -6  -3 359.149  19.790  14 
   3   6   3 372.510  21.931   5 
  -4  -6  -3 89.2842  5.6688  14 
  -4  -6  -3 87.0870  6.8403   2 
  -4  -6  -3 85.2801  9.5542  15 
  -4  -6  -3 100.530  12.861   1 
  -5  -6  -3 15.7588  2.2933   2 
  -5  -6  -3 26.1930  4.2957  15 
  -5  -6  -3 16.2240  5.2740   1 
  -6  -6  -3 32.8166  6.8582   1 
  -6  -6  -3 34.7105  4.7155  15 
  -6  -6  -3 42.2191  3.4144   2 
  -7  -6  -3 2.24804 1.16020  15 
  -7  -6  -3 2.13229 0.70600   2 
  -7  -6  -3 1.75521 2.25185   1 
  -7   7   3 17.3313  1.5975   6 
  -7   7   3 15.8038  1.2482   4 
  -7   7   3 15.4345  1.3529   7 
  -6   7   3 48.9603  3.1601   4 
  -6   7   3 47.4238  3.9483   6 
  -6   7   3 45.3843  3.4478   7 
  -5   7   3 14.1076  1.6167   4 
  -5   7   3 14.3754  2.2621   6 
  -5   7   3 19.8518  2.0571   7 
  -4   7   3 147.650   8.609   4 
  -4   7   3 146.980   9.446   7 
  -4   7   3 139.125  10.545   6 
  -3   7   3 275.664  18.055   8 
  -3   7   3 304.989  16.319   4 
  -3   7   3 277.984  17.479  10 
  -3   7   3 295.645  19.728   6 
  -2   7   3 219.900  14.320   8 
  -2   7   3 231.508  14.251  10 
  -1   7   3 145.933   9.586   8 
  -1  -7  -3 140.891   8.255  13 
   1   7   3 103.749   7.776   8 
  -2  -7  -3 168.113  19.872   1 
  -3  -7  -3 99.4648  7.4698   2 
  -3  -7  -3 104.542   6.636  14 
  -3  -7  -3 101.188  13.503   1 
  -4  -7  -3 54.9329  3.8070  14 
  -4  -7  -3 57.6443  4.5956   2 
  -4  -7  -3 49.0760  6.4255  15 
  -4  -7  -3 52.1510  8.7191   1 
  -5  -7  -3 15.8763  4.9473   1 
  -5  -7  -3 19.0974  2.3538   2 
  -5  -7  -3 24.1990  3.9139  15 
  -6  -7  -3 46.0402  3.6429   2 
  -6  -7  -3 41.8470  6.9754   1 
  -6  -7  -3 46.1987  4.9974  15 
  -6   8   3 60.7538  3.5806   4 
  -6   8   3 54.7350  3.8429   7 
  -6   8   3 56.4177  4.3845   6 
  -5   8   3 20.8853  2.4622   6 
  -5   8   3 19.1325  1.7717   7 
  -5   8   3 14.3871  2.1096   8 
  -5   8   3 17.5324  1.6809   4 
  -4   8   3 29.2856  3.1700   8 
  -4   8   3 30.2809  3.1476   6 
  -4   8   3 29.0617  2.2975   4 
  -3   8   3 25.2610  2.9410   8 
  -3   8   3 25.3176  2.0977  10 
  -3   8   3 25.3519  2.1422   4 
  -3   8   3 26.0540  3.1615   6 
  -2   8   3 196.677  12.574  10 
  -1   8   3 32.0853  3.1068   8 
  -1   8   3 35.2287  3.2076  10 
   0  -8  -3 1.82737 2.82928   1 
  -1  -8  -3 68.0031  9.5811   1 
  -1  -8  -3 69.6146  5.1346  13 
   1   8   3 64.5482  4.9133   8 
  -2  -8  -3 179.150  21.047   1 
  -3  -8  -3 36.8257  7.1838   1 
  -3  -8  -3 37.7945  3.2086  14 
  -4  -8  -3 10.7105  1.7162   2 
  -4  -8  -3 12.7418  2.9327  15 
  -4  -8  -3 15.2098  4.5277   1 
  -4  -8  -3 10.9440  1.4759  14 
  -5  -8  -3 0.97970 2.54102   1 
  -5  -8  -3 0.80961 1.39878  15 
  -5  -8  -3 1.09779 0.82212   2 
  -6  -8  -3 52.8280  3.9103   2 
  -6  -8  -3 51.7744  7.0608   1 
  -6  -8  -3 54.4740  5.1891  15 
  -5   9   3 16.8333  2.0305   6 
  -5   9   3 17.3010  1.4574   4 
  -5   9   3 20.9748  2.1514   8 
  -4   9   3 79.3929  5.7090   8 
  -4   9   3 74.6729  4.7864   4 
  -4   9   3 81.3548  6.0768   6 
  -3   9   3 5.16562 1.44950   8 
  -3   9   3 6.57220 1.57932   6 
  -3   9   3 6.15160 1.05470   4 
  -2   9   3 10.0740  1.8031   8 
  -2   9   3 11.6540  1.7248  10 
  -1   9   3 543.772  35.439  10 
  -1   9   3 628.937  35.535   8 
   0  -9  -3 130.560   8.610  13 
   0  -9  -3 144.901  15.730   1 
   0   9   3 112.610   8.500   8 
  -1  -9  -3 600.298  59.442   1 
   1   9   3 530.267  33.833   8 
  -2  -9  -3 3.03152 1.31349  14 
  -2  -9  -3 3.90075 3.02285   1 
  -3  -9  -3 0.37194 0.92998  14 
  -3  -9  -3 0.98319 2.53676   1 
  -4  -9  -3 90.8794  5.4853  14 
  -4  -9  -3 101.085  12.328   1 
  -4  -9  -3 98.3866  6.8527   2 
  -5  -9  -3 46.9052  3.5523   2 
  -5  -9  -3 46.9561  6.7336   1 
  -4  10   3 11.1380  1.5315   6 
  -4  10   3 8.94431 1.51568   8 
  -4  10   3 11.3240  1.1051   4 
  -3  10   3 45.8935  3.8101   8 
  -2  10   3 9.46558 1.69013   8 
  -2  10   3 11.4517  1.5221  10 
  -1  10   3 6.19944 1.39860  10 
  -1  10   3 6.02414 1.43874   8 
   0 -10  -3 25.6084  5.1257   1 
   0 -10  -3 24.6751  2.5694  13 
   0  10   3 18.0095  2.3557   8 
  -1 -10  -3 19.3547  4.6398   1 
   1  10   3 19.8038  2.2739   8 
  -2 -10  -3 27.2910  2.7691  14 
  -2 -10  -3 29.8382  5.6935   1 
  -3 -10  -3 67.8716  9.1746   1 
  -3 -10  -3 68.5498  4.3707  14 
  -4 -10  -3 1.18253 1.91365   1 
   3 -11  -3 69.2149  5.2100  13 
  -3  11   3 88.7191  5.4785   8 
   2 -11  -3 46.4044  3.5371  13 
  -2  11   3 45.8161  3.6497   8 
   1 -11  -3 10.9951  1.5818  13 
  -1  11   3 11.8203  1.5504  10 
  -1  11   3 9.98419 1.56593   8 
   0 -11  -3 176.045  17.823   1 
   0  11   3 144.491   9.920   8 
   0  11   3 150.377  10.031  10 
  -1 -11  -3 4.65734 2.55373   1 
   1  11   3 4.16656 1.01564   8 
  -2 -11  -3 19.9003  4.0506   1 
  -2 -11  -3 20.2868  2.0130  14 
  -3 -11  -3 43.2803  5.9679   1 
  -3 -11  -3 43.0376  2.6697  14 
   0  12   3 10.8542  1.3118  10 
   2  14  -4 18.5466  1.6069   8 
  -2 -14   4 17.7416  1.6914  14 
   1  14  -4 8.17701 1.07580   8 
  -1 -14   4 3.03707 2.05793   1 
   0  14  -4 159.409   9.182   8 
   0  14  -4 149.596   9.230  10 
   0 -14   4 124.392  16.041   1 
  -1  14  -4 8.59368 1.19173  10 
  -1  14  -4 9.23688 1.37203   6 
  -1  14  -4 9.06277 1.27266   8 
   1 -14   4 11.5853  2.8085   1 
  -2  14  -4 25.0444  2.1527   6 
   2 -14   4 16.7478  3.4539   1 
  -3  14  -4 5.91817 1.03097   6 
   3  13  -4 1.06782 0.54357   8 
  -3 -13   4 1.70364 0.67689  14 
  -3 -13   4 -0.1128  1.3279  15 
   2  13  -4 10.0227  1.3147   8 
  -2 -13   4 11.7827  2.7277  15 
  -2 -13   4 8.73998 2.97447   1 
   1  13  -4 352.801  18.970   8 
  -1 -13   4 263.382  32.902   1 
   0  13  -4 91.9137  6.3427   8 
   0  13  -4 95.7739  6.9842   6 
   0 -13   4 92.4002 11.5170   1 
  -1  13  -4 344.955  22.194  10 
  -1  13  -4 347.469  24.212   6 
  -1  13  -4 350.198  22.097   8 
   1 -13   4 420.339  38.910   1 
  -2  13  -4 1.57675 0.75980  10 
  -2  13  -4 0.13842 0.89733   6 
   2 -13   4 3.00084 2.02364   1 
  -3  13  -4 6.78290 1.43351   6 
   3 -13   4 7.15084 2.49879   1 
   4 -13   4 9.66745 2.47318   1 
   4  12  -4 19.9784  1.7267   8 
  -4 -12   4 18.6798  3.3043  15 
   3  12  -4 1.52224 0.68110   8 
  -3 -12   4 0.36492 1.67375  15 
   2  12  -4 290.687  16.137   8 
  -2 -12   4 262.764  23.395  15 
  -2 -12   4 225.346  28.366   1 
   1  12  -4 15.3707  1.8196   8 
  -1 -12   4 19.7312  3.8227  15 
  -1 -12   4 10.2873  3.6798   1 
   0  12  -4 79.1396  6.3733   6 
   0  12  -4 80.3270  5.7120   8 
   0 -12   4 82.4794 10.5201   1 
  -1  12  -4 8.21994 1.67577  10 
  -1  12  -4 9.58756 1.99019   6 
  -1  12  -4 11.6403  1.7912   8 
   1 -12   4 14.9173  3.8130   1 
  -2  12  -4 302.290  18.930  10 
  -2  12  -4 297.454  20.935   6 
   2 -12   4 320.217  33.190   1 
  -3  12  -4 -0.2221  0.9701   6 
   3 -12   4 -0.3760  1.7886   1 
  -4  12  -4 7.44308 1.52046   6 
   4 -12   4 4.28829 2.29370   1 
   5  11  -4 11.2561  1.2379   8 
  -5 -11   4 7.86462 2.37944  15 
  -5 -11   4 12.1783  1.5527   2 
  -4 -11   4 18.8095  3.7555  15 
  -3 -11   4 14.2820  3.3822  15 
  -2 -11   4 17.9930  3.8465  15 
  -2 -11   4 13.8873  4.3271   1 
   1  11  -4 128.687   8.883   8 
   1  11  -4 133.527   9.870   6 
  -1 -11   4 155.197  13.584  15 
   0  11  -4 260.459  15.434   8 
   0  11  -4 247.145  17.019   6 
   0 -11   4 229.276  27.014   1 
  -1  11  -4 177.232  11.913   8 
  -1  11  -4 178.368  13.340   6 
  -1  11  -4 181.703  12.266  10 
   1 -11   4 214.353  21.515   1 
  -2  11  -4 136.448   9.072  10 
  -2  11  -4 133.131  10.109   6 
   2 -11   4 132.033  15.955   1 
  -3  11  -4 32.1402  2.6228  10 
  -3  11  -4 36.7945  3.6956   6 
   3 -11   4 28.9713  5.8793   1 
   4 -11   4 71.2643  9.4513   1 
  -5  11  -4 14.0275  2.0295   6 
  -5  11  -4 15.8061  1.7422   7 
  -6  11  -4 32.5893  2.4104   7 
  -6 -10   4 12.8664  1.6406   2 
  -6 -10   4 15.5500  2.8502  15 
  -5 -10   4 28.2833  2.8774   2 
  -5 -10   4 29.2964  4.7509  15 
  -4 -10   4 91.1394 10.2041  15 
  -4 -10   4 99.7520  7.4213   2 
  -3 -10   4 108.903  11.354  15 
  -2 -10   4 224.381  20.084  15 
  -2 -10   4 211.485  24.547   1 
   1  10  -4 107.736   7.545   6 
  -1 -10   4 96.5072 10.1684  15 
  -1 -10   4 94.7332 12.4549   1 
   0  10  -4 135.288  10.636   6 
   0  10  -4 147.622   9.610   8 
   0 -10   4 167.165  17.492   1 
  -1  10  -4 67.7232  4.9253   8 
  -2  10  -4 205.894  15.476   6 
  -2  10  -4 209.257  14.052  10 
   2 -10   4 248.183  24.851   1 
  -3  10  -4 71.3211  4.9647  10 
  -3  10  -4 72.7026  6.0356   6 
  -3  10  -4 69.0242  8.7681   1 
   3 -10   4 65.6017  9.4812   1 
  -4  10  -4 44.1333  3.6553   7 
  -4  10  -4 44.4456  4.1835   6 
  -4  10  -4 48.4190  6.1349   1 
   4 -10   4 30.8500  6.5904   1 
  -5  10  -4 45.9886  3.1424   4 
  -5  10  -4 51.1540  3.8731   7 
  -5  10  -4 40.7581  6.0461   1 
  -5  10  -4 50.9469  4.3079   6 
  -6  10  -4 12.4669  1.2521   4 
  -6  10  -4 11.6349  1.5198   7 
  -6  -9   4 22.5640  3.9221  15 
  -6  -9   4 23.2818  2.4330   2 
  -5  -9   4 115.487   8.705   2 
  -5  -9   4 116.364  12.020  15 
  -4  -9   4 183.492  10.945  11 
  -4  -9   4 174.973  12.814   2 
  -4  -9   4 171.403  17.116  15 
  -3  -9   4 36.5188  6.1157  15 
  -3  -9   4 49.5713  3.3930  11 
  -1  -9   4 9.03826 2.26073   9 
   0  -9   4 3.15882 1.38927   9 
  -1   9  -4 2.20714 1.26813   3 
   1  -9   4 10.2724  1.8038   9 
  -2   9  -4 136.848  11.353   3 
  -3   9  -4 67.5433  5.3427   7 
  -3   9  -4 74.3600  8.9542   1 
  -3   9  -4 65.8350  5.9425   6 
  -3   9  -4 76.9970  5.1220  10 
  -4   9  -4 315.702  18.365   4 
  -4   9  -4 329.722  20.564   7 
  -4   9  -4 347.242  34.630   1 
  -4   9  -4 315.092  22.254   6 
  -5   9  -4 86.6489  7.4937   6 
  -5   9  -4 102.942   7.132   7 
  -5   9  -4 95.4760  6.0958   4 
  -5   9  -4 108.589  11.644   1 
  -6   9  -4 29.9486  2.4522   4 
  -6   9  -4 35.3168  3.0130   7 
  -6   9  -4 35.4247  4.8317   1 
  -7   9  -4 22.6820  1.6721   4 
  -7   9  -4 21.8868  1.9113   7 
  -7  -8   4 42.4910  3.4672   2 
  -6  -8   4 37.4411  3.3533   2 
  -6  -8   4 24.9591  4.7086  15 
  -5  -8   4 10.4445  1.4925  11 
  -5  -8   4 11.5218  1.4604   8 
  -5  -8   4 12.0666  3.7248  15 
  -5  -8   4 13.0161  2.3489   2 
  -4  -8   4 4.69762 2.68668  15 
  -4  -8   4 6.39404 1.87819   2 
  -4  -8   4 5.97257 1.10436   8 
  -4  -8   4 6.75794 1.20278  11 
  -3  -8   4 51.8704  4.5461   5 
  -3  -8   4 54.9083  3.9421   8 
  -3  -8   4 57.0117  3.9005  11 
  -2  -8   4 65.3850  6.7774   9 
  -2  -8   4 71.2945  5.1780   5 
  -2  -8   4 66.6600  4.5036  11 
  -1  -8   4 316.024  25.414   9 
   0   8  -4 6.81137 1.54988   3 
   0  -8   4 12.0098  1.9719   9 
  -1   8  -4 405.934  30.913   3 
   1  -8   4 421.080  32.395   9 
  -2   8  -4 75.4295  6.1532   3 
   2  -8   4 57.5124  5.7798   9 
  -3   8  -4 71.6046  6.6896   3 
  -4   8  -4 106.329   7.844   7 
  -4   8  -4 102.530   6.823   4 
  -4   8  -4 125.236  13.033   1 
  -5   8  -4 15.6935  1.9577   4 
  -5   8  -4 19.0486  2.5476   7 
  -5   8  -4 19.5189  3.8218   1 
  -6   8  -4 85.6093  5.3279   4 
  -6   8  -4 78.1165  9.7250   1 
  -6   8  -4 81.2318  5.9897   7 
  -7   8  -4 31.2276  2.7223   7 
  -7   8  -4 33.6674  2.4559   4 
  -7   8  -4 37.1637  4.6922   1 
  -7  -7   4 19.1986  2.3488   2 
  -6  -7   4 11.0250  1.3488   8 
  -6  -7   4 10.0477  2.0455   2 
  -6  -7   4 6.65450 2.91349  15 
  -5  -7   4 146.730  13.807  15 
  -5  -7   4 131.691   8.424  11 
  -5  -7   4 133.545   8.507   8 
  -5  -7   4 120.530   9.946   2 
  -4  -7   4 432.678  29.262   2 
  -4  -7   4 438.380  26.105   8 
  -4  -7   4 409.459  26.963   5 
  -4  -7   4 451.686  25.561  11 
  -3  -7   4 40.0930  3.7937   5 
  -3  -7   4 47.9835  3.3203  11 
  -2  -7   4 94.3850  8.8104   9 
  -2  -7   4 93.2474  6.7832   5 
  -2  -7   4 102.940   6.200  11 
   1   7  -4 129.360   9.417   3 
  -1  -7   4 122.368   7.340  11 
  -1  -7   4 106.757  10.152   9 
   0   7  -4 3.19596 1.04048   3 
   0  -7   4 3.79057 1.06492   9 
  -1   7  -4 132.865  11.199   3 
   1  -7   4 150.700  11.625   9 
  -2   7  -4 19.9322  2.7662   3 
   2  -7   4 18.7606  2.2444   9 
  -3   7  -4 108.477   8.931   3 
   3  -7   4 101.505   8.892   9 
  -4   7  -4 378.481  39.684   1 
  -5   7  -4 85.9129  6.7241   7 
  -5   7  -4 98.0862 11.1835   1 
  -5   7  -4 91.3269  6.0456   4 
  -6   7  -4 43.7302  3.9845   7 
  -6   7  -4 46.9987  3.6407   4 
  -6   7  -4 54.9787  6.8190   1 
  -7   7  -4 44.0760  5.5925   1 
  -7   7  -4 38.8737  2.9314   4 
  -7   7  -4 38.6864  3.2430   7 
  -7  -6   4 36.2197  3.4641   2 
  -6  -6   4 77.6366  5.0827   8 
  -6  -6   4 73.2644  5.0775  11 
  -6  -6   4 70.6171  6.2760   2 
  -5  -6   4 211.968  16.286   2 
  -5  -6   4 235.328  21.511  15 
  -5  -6   4 240.924  14.335   8 
  -5  -6   4 233.428  14.063  11 
  -4  -6   4 122.022   7.716  11 
  -4  -6   4 119.882   8.516   5 
  -3  -6   4 288.825  18.519   5 
  -3  -6   4 298.596  17.418  11 
   2   6  -4 562.131  38.315   3 
  -2  -6   4 501.660  31.901   5 
  -2  -6   4 543.212  30.470  11 
  -2  -6   4 489.607  40.999   9 
   1   6  -4 370.492  24.006   3 
  -1  -6   4 295.046  25.458   9 
  -1  -6   4 307.934  18.868  11 
   0   6  -4 229.231  18.528   3 
   0  -6   4 266.570  19.558   9 
  -1   6  -4 430.439  33.161   3 
   1  -6   4 468.533  34.832   9 
  -2   6  -4 508.582  35.798   3 
   2  -6   4 460.474  37.389   9 
  -3   6  -4 331.559  25.105   3 
   3  -6   4 333.793  26.161   9 
  -4   6  -4 19.0117  3.0525   3 
   4  -6   4 28.1903  2.9606   9 
  -5   6  -4 458.091  25.316   4 
  -5   6  -4 411.812  27.627   7 
  -5   6  -4 473.941  47.007   1 
  -6   6  -4 2.50873 1.17118   7 
  -6   6  -4 3.37661 1.16212   4 
  -6   6  -4 2.99268 2.16567   1 
  -7   6  -4 10.3523  1.6460   7 
  -7   6  -4 10.0638  1.4786   4 
  -7   6  -4 12.5949  3.0443   1 
  -8   6  -4 0.33614 0.45573   4 
  -7  -5   4 2.97662 1.45230   2 
  -6  -5   4 52.9053  5.0231   2 
  -6  -5   4 52.2247  3.8459   8 
  -5  -5   4 79.2152  6.7092   5 
  -5  -5   4 95.7839  6.0547  11 
  -5  -5   4 91.5136  7.4743   2 
  -5  -5   4 92.8053  6.1497   8 
  -4  -5   4 182.769  12.732   5 
  -4  -5   4 204.085  11.862  11 
  -3  -5   4 178.105  12.032   5 
  -3  -5   4 193.353  11.260  11 
   2   5  -4 139.915  10.000   3 
  -2  -5   4 126.873   8.677   5 
  -2  -5   4 124.276  10.930   9 
  -2  -5   4 137.806   8.093  11 
   1   5  -4 386.583  25.148   3 
  -1  -5   4 317.873  19.837  11 
  -1  -5   4 299.400  26.611   9 
  -1  -5   4 370.117  20.897   5 
   0   5  -4 9.01795 1.57925   3 
   0  -5   4 10.2255  1.3528   5 
   0  -5   4 10.0229  1.4453   9 
  -1   5  -4 252.047  22.013   3 
   1  -5   4 342.235  23.214   9 
  -2   5  -4 291.131  21.477   3 
   2  -5   4 282.973  22.413   9 
  -3   5  -4 77.3835  6.4188   3 
   3  -5   4 72.6415  6.4725   9 
  -4   5  -4 90.6189  7.4159   3 
   4  -5   4 80.8713  7.4372   9 
  -5   5  -4 56.9320  7.9721   1 
  -5   5  -4 61.4839  4.4358   4 
  -6   5  -4 25.8480  5.0656   1 
  -6   5  -4 18.4927  2.3875   4 
  -6   5  -4 21.5997  2.6537   7 
  -7   5  -4 36.4077  2.8961   4 
  -7   5  -4 34.3603  3.1004   7 
  -7   5  -4 39.4440  5.7131   1 
  -8   5  -4 52.0874  3.2928   4 
  -6  -4   4 99.5476  7.7954   2 
  -6  -4   4 89.5684  6.1377  11 
  -6  -4   4 97.0000  6.3887   8 
  -5  -4   4 400.806  24.471   8 
  -5  -4   4 409.344  25.361   5 
  -5  -4   4 404.805  23.809  11 
  -4  -4   4 42.7875  3.7761   5 
  -4  -4   4 44.5853  3.1997  11 
   3   4  -4 429.997  32.302   3 
  -3  -4   4 442.376  27.163   5 
  -3  -4   4 461.536  25.832  11 
   2   4  -4 143.519  10.395   3 
  -2  -4   4 139.112   8.371  11 
  -2  -4   4 134.121   8.950   5 
   1   4  -4 217.114  14.821   3 
  -1  -4   4 169.734  15.646   9 
  -1  -4   4 215.633  12.421   5 
   0   4  -4 99.6104  7.9510   3 
   0  -4   4 101.167   6.551   5 
   0  -4   4 111.459   8.334   9 
  -1   4  -4 230.333  18.762   3 
   1  -4   4 249.899  15.247   5 
   1  -4   4 277.061  19.739   9 
  -2   4  -4 41.5404  3.7110   3 
   2  -4   4 41.2201  3.7423   9 
  -3   4  -4 1087.09   78.70   3 
   3  -4   4 1079.77   83.07   9 
  -4   4  -4 113.095   8.977   3 
   4  -4   4 105.961   9.289   9 
  -6   4  -4 158.026   9.782   4 
  -6   4  -4 172.797  18.602   1 
  -6   4  -4 148.545  10.475   7 
  -7   4  -4 24.4609  2.4404   4 
  -7   4  -4 26.1577  5.0755   1 
  -8   4  -4 5.07465 0.86033   4 
  -6  -3   4 40.7323  3.3093   8 
  -5  -3   4 64.0565  5.3434   5 
  -5  -3   4 69.2805  4.5611  11 
   4   3  -4 238.759  17.670   3 
  -4  -3   4 230.246  15.185   5 
  -4  -3   4 243.542  14.153  11 
   3   3  -4 537.243  39.294   3 
  -3  -3   4 560.243  31.257  11 
  -3  -3   4 523.857  32.752   5 
   2   3  -4 1115.25   77.09   3 
  -2  -3   4 1022.60   63.54   5 
  -2  -3   4 1064.18   61.09  11 
   1   3  -4 294.452  20.779   3 
  -1  -3   4 253.234  21.893   9 
  -1  -3   4 310.519  17.290   5 
   0  -3   4 273.695  16.733   5 
   0  -3   4 282.540  21.417   9 
  -1   3  -4 239.476  18.549   3 
   1  -3   4 263.952  15.117   5 
  -2   3  -4 1314.44   89.68   3 
   2  -3   4 1215.86   94.75   9 
   2  -3   4 1191.86   73.26   5 
  -3   3  -4 191.517  14.433   3 
   3  -3   4 188.760  15.245   9 
   4  -3   4 724.324  56.072   9 
  -6   3  -4 95.0323  6.0134   4 
  -6   3  -4 80.6183 11.3936   1 
  -7   3  -4 84.3096 10.4690   1 
  -7   3  -4 75.4852  5.1657   4 
  -8   3  -4 26.5435  4.1625   1 
  -6  -2   4 145.396   9.428   8 
  -5  -2   4 134.092   9.286   5 
   4   2  -4 324.553  24.190   3 
  -4  -2   4 319.163  19.156  11 
  -4  -2   4 344.082  20.515   5 
   3   2  -4 68.4019  5.4071   3 
  -3  -2   4 65.0668  4.8296   5 
  -3  -2   4 70.2901  4.3147  11 
   2   2  -4 278.279  19.700   3 
  -2  -2   4 257.437  16.412   5 
   1   2  -4 -0.1065  0.1914   3 
  -1  -2   4 -0.0687  0.2539   5 
   0   2  -4 98.4107  7.4913   3 
   0  -2   4 102.367   6.225   5 
  -1   2  -4 146.286  10.588   3 
   1  -2   4 130.135   8.607   5 
   1  -2   4 150.298  11.202   9 
  -2   2  -4 819.687  57.249   3 
  -2   2  -4 785.965  60.747   9 
   2  -2   4 764.331  46.801   5 
  -3   2  -4 26.0676  2.3803   3 
  -3   2  -4 24.8807  2.7987   9 
   3  -2   4 22.0037  2.5451   9 
   3  -2   4 21.5747  1.7114   5 
  -4   2  -4 161.433  13.510   9 
   4  -2   4 157.252  13.198   9 
   5  -2   4 122.184  10.684   9 
  -6   2  -4 38.3552  3.2747   4 
  -6   2  -4 35.4375  4.6487  15 
  -6   2  -4 48.3489  8.0119   1 
  -7   2  -4 20.2764  4.9612   1 
  -8   2  -4 4.65694 2.25492   1 
  -6  -1   4 112.193   7.926   8 
  -6  -1   4 126.545   8.591   6 
   5   1  -4 4.26122 1.17352   3 
   4   1  -4 895.390  65.870   3 
  -4  -1   4 920.247  54.515   5 
   3   1  -4 672.684  48.256   3 
  -3  -1   4 681.800  39.935   5 
  -3  -1   4 639.840  38.094  11 
   2   1  -4 1004.35   71.50   3 
  -2  -1   4 973.929  58.831   5 
   1   1  -4 586.312  43.109   3 
  -1  -1   4 604.888  35.497   5 
   0   1  -4 349.464  23.692   9 
   0   1  -4 302.525  22.360   3 
   0  -1   4 300.776  23.572   9 
   0  -1   4 278.679  24.109  12 
  -1   1  -4 557.951  41.512   3 
  -1   1  -4 616.139  44.151   9 
   1  -1   4 587.795  34.089   5 
   1  -1   4 536.709  44.562  12 
  -2   1  -4 680.057  45.493   3 
  -2   1  -4 587.671  48.390   9 
   2  -1   4 612.972  37.276   5 
  -3   1  -4 691.572  52.341   9 
   3  -1   4 658.618  40.112   5 
  -4   1  -4 527.305  40.172   9 
   4  -1   4 493.330  30.456   5 
  -5   1  -4 35.1075  4.7408   9 
   5  -1   4 29.1428  3.6948   9 
  -6   1  -4 248.217  20.647  15 
  -6   1  -4 210.149  26.183   1 
  -7   1  -4 19.8557  5.0362   1 
  -7   1  -4 15.4500  2.9951  15 
  -8   1  -4 27.6391  4.4812   1 
  -6   0   4 72.4605  5.6360   6 
   5   0  -4 74.4246  6.3471   3 
   4   0  -4 63.0560  5.3252   3 
  -3   0   4 496.417  31.313   5 
  -3   0   4 540.966  38.010   3 
  -2   0   4 233.362  16.772   3 
  -2   0   4 214.965  13.847   5 
   1   0  -4 1067.05   77.20   3 
  -1   0   4 1047.68   83.19  12 
  -1   0   4 1094.90   63.41   5 
   0   0  -4 3.24231 0.70723   9 
   0   0  -4 3.95784 0.60971   3 
   0   0   4 4.43814 0.82530  12 
   0   0   4 3.14697 0.55365   5 
  -1   0  -4 1187.58   90.87   9 
  -1   0  -4 1089.56   85.61   3 
   1   0   4 1292.03   92.21  12 
  -2   0  -4 266.747  21.991   9 
   2   0   4 286.092  16.805   5 
  -3   0  -4 1130.44   87.11   9 
   3   0   4 1131.31   67.07   5 
  -4   0  -4 22.4670  3.5349   9 
   4   0   4 23.4452  1.9827   5 
  -6   0  -4 17.8717  3.4843  15 
  -6   0  -4 8.99938 4.48711   1 
  -7   0  -4 82.7279  8.5112  15 
  -7   0  -4 88.7655 11.5653   1 
  -8   0  -4 49.4502  6.6620   1 
  -7   1   4 93.4688  6.8395   6 
  -6   1   4 109.989   7.713   8 
  -6   1   4 110.682   7.483   7 
  -6   1   4 117.474   8.308   6 
   5  -1  -4 34.9432  3.3954   3 
  -5   1   4 27.1865  2.9964   8 
  -4   1   4 34.6749  3.4363   3 
  -3   1   4 743.068  54.133   3 
  -2   1   4 1262.73   89.13   3 
  -2   1   4 1229.85   96.05  12 
  -2   1   4 1202.43   73.13   5 
   1  -1  -4 505.605  38.816   3 
  -1   1   4 554.862  31.934   5 
  -1   1   4 532.037  41.987  12 
  -1   1   4 548.384  38.901   3 
   0  -1  -4 1577.26  110.31   3 
   0  -1  -4 1520.95  116.77   9 
   0   1   4 1587.84   90.54   5 
   0   1   4 1441.38  118.81  12 
  -1  -1  -4 294.429  23.774   9 
   1   1   4 312.892  18.275   5 
  -2  -1  -4 938.830  74.759   9 
   2   1   4 1001.13   57.66   5 
  -3  -1  -4 275.723  22.517   9 
   3   1   4 279.794  16.939   5 
  -4  -1  -4 81.9444  8.0327   9 
   4   1   4 81.6484  5.5360   5 
  -5  -1  -4 15.9318  5.1572   1 
   5   1   4 18.7227  2.0796   5 
  -6  -1  -4 47.8164  6.0040  15 
  -6  -1  -4 45.4680  8.8246   1 
  -7  -1  -4 63.5216  9.4397   1 
  -7  -1  -4 62.9577  6.8176  15 
  -8  -1  -4 31.9309  3.4157  15 
  -8  -1  -4 27.8791  4.6631   1 
  -7   2   4 82.5401  6.4344   6 
  -7   2   4 91.8520  5.8583   7 
  -6   2   4 15.8493  2.2806   6 
  -6   2   4 20.7879  2.5275   8 
  -6   2   4 16.3946  2.0061   7 
  -5   2   4 17.6801  2.2716   8 
  -4   2   4 58.2387  5.2513   3 
  -3   2   4 253.267  19.054   3 
  -2   2   4 407.882  32.207  12 
  -2   2   4 400.572  29.700   3 
  -1   2   4 149.778  11.560   3 
  -1   2   4 155.263  12.643  12 
  -1   2   4 156.386   9.492   5 
   0  -2  -4 1713.49  122.33   9 
   0   2   4 1593.52   94.68   5 
   0   2   4 1500.07  124.34  12 
  -1  -2  -4 108.757   9.880   9 
   1   2   4 127.453   7.450   5 
  -2  -2  -4 633.384  51.339   9 
   2   2   4 684.253  39.408   5 
  -3  -2  -4 175.627  14.832   9 
   3   2   4 171.860  10.866   5 
  -4  -2  -4 148.562  13.000   9 
   4   2   4 139.414   9.218   5 
  -5  -2  -4 29.5416  3.2559   2 
  -5  -2  -4 25.7626  4.7429  15 
  -5  -2  -4 28.3710  6.8403   1 
   5   2   4 26.6346  2.5419   5 
  -6  -2  -4 4.74856 1.50894   2 
  -6  -2  -4 1.73912 1.97788  15 
  -6  -2  -4 5.13717 3.63509   1 
  -7  -2  -4 31.6117  6.3440   1 
  -8  -2  -4 1.27915 1.00473  15 
  -7   3   4 110.187   7.654   6 
  -7   3   4 101.969   6.876   7 
  -6   3   4 1.25059 0.80069   7 
  -6   3   4 1.48961 1.13773   8 
  -6   3   4 2.11573 1.09371   6 
  -6   3   4 0.28320 0.66508   4 
  -5   3   4 84.9059  5.8662   7 
  -5   3   4 78.6745  6.4554   6 
  -5   3   4 85.9169  5.2531   4 
  -5   3   4 78.7830  6.0416   8 
  -4   3   4 57.7231  5.3038   3 
  -3   3   4 571.913  42.059   3 
  -2   3   4 379.632  29.542  12 
  -2   3   4 356.459  27.141   3 
  -1   3   4 182.729  14.941  12 
  -1   3   4 181.351  13.670   3 
   0  -3  -4 2930.63  206.34   9 
   0   3   4 2484.54  159.63   5 
  -1  -3  -4 291.324  24.116   9 
   1   3   4 312.467  18.323   5 
  -2  -3  -4 141.382  11.792   9 
   2   3   4 129.835   8.496   5 
  -3  -3  -4 483.167  37.917   9 
   3   3   4 464.859  28.577   5 
  -4  -3  -4 45.6524  4.0965  13 
   4   3   4 48.8257  3.7010   5 
  -5  -3  -4 67.6290 11.5161   1 
  -5  -3  -4 87.2487  9.2227  15 
  -5  -3  -4 88.1264  6.5095   2 
  -6  -3  -4 28.2664  2.8698   2 
  -6  -3  -4 28.5766  4.7529  15 
  -6  -3  -4 18.9149  5.8768   1 
  -7  -3  -4 8.98359 1.48200   2 
  -7  -3  -4 6.88097 3.49841   1 
  -7  -3  -4 7.97811 2.19633  15 
  -7   4   4 1.03501 0.59942   7 
  -7   4   4 1.45907 0.59802   4 
  -7   4   4 1.06834 0.79063   6 
  -6   4   4 24.4231  2.3730   7 
  -6   4   4 28.2787  3.0544   8 
  -6   4   4 26.2326  2.9921   6 
  -6   4   4 24.6387  2.0816   4 
  -5   4   4 0.57228 1.04366   8 
  -5   4   4 1.55122 0.74703   4 
  -5   4   4 -0.6042  0.9276   6 
  -5   4   4 1.18563 0.85360   7 
  -4   4   4 302.078  18.860   8 
  -3   4   4 20.9288  3.3558  12 
  -3   4   4 18.4850  2.5999   3 
  -2   4   4 151.390  12.014   3 
  -2   4   4 160.439  13.319  12 
  -1   4   4 765.626  60.169  12 
   0   4   4 661.986  39.456   5 
  -1  -4  -4 724.943  60.234   9 
   1   4   4 822.578  46.260   5 
  -2  -4  -4 63.6355  6.6616   9 
   2   4   4 65.9932  4.5087   5 
  -3  -4  -4 40.3946  5.6527   9 
   3   4   4 42.2131  3.2734   5 
  -4  -4  -4 274.987  23.679  15 
  -4  -4  -4 262.465  14.459  14 
  -4  -4  -4 259.316  17.778   2 
  -4  -4  -4 273.127  16.720  13 
  -4  -4  -4 236.843  29.562   1 
   4   4   4 261.674  16.381   5 
  -5  -4  -4 100.195  10.005  15 
  -5  -4  -4 89.2311  7.0251   2 
  -5  -4  -4 86.4491 12.8589   1 
  -6  -4  -4 13.5470  1.9578   2 
  -6  -4  -4 11.0236  2.9116  15 
  -6  -4  -4 8.28599 4.30215   1 
  -7  -4  -4 1.97389 1.37366  15 
  -7  -4  -4 2.90178 2.69635   1 
  -7  -4  -4 1.55473 0.82627   2 
  -7   5   4 1.23208 0.53898   4 
  -7   5   4 0.51787 0.51326   7 
  -7   5   4 0.81447 0.65158   6 
  -6   5   4 5.25043 1.43571   8 
  -6   5   4 7.77556 1.47633   6 
  -6   5   4 7.81248 1.23381   7 
  -6   5   4 7.75183 1.13620   4 
  -5   5   4 175.155  11.829   8 
  -5   5   4 185.130  10.506   4 
  -5   5   4 175.861  12.754   6 
  -5   5   4 182.978  11.594   7 
  -4   5   4 60.9754  5.1687   6 
  -4   5   4 60.5239  4.4904   7 
  -4   5   4 63.0636  4.0458   4 
  -4   5   4 54.9205  4.7230   8 
  -3   5   4 312.700  19.895   8 
  -3   5   4 330.147  24.306   3 
  -2   5   4 214.929  18.066  12 
  -1   5   4 237.346  19.556  12 
   0   5   4 5.79806 1.55571  12 
  -1  -5  -4 320.376  27.879   9 
   1   5   4 368.935  21.083   5 
  -2  -5  -4 210.350  17.651   9 
   2   5   4 202.353  12.838   5 
  -3  -5  -4 243.616  15.063  13 
   3   5   4 225.706  14.603   5 
  -4  -5  -4 106.439  13.778   1 
  -4  -5  -4 98.1303 10.2749  15 
  -4  -5  -4 100.996   6.153  14 
  -4  -5  -4 93.3331  7.3789   2 
  -5  -5  -4 61.7945  7.2228  15 
  -5  -5  -4 51.8851  9.9428   1 
  -5  -5  -4 68.0859  5.1910   2 
  -6  -5  -4 17.8424  2.1262   2 
  -6  -5  -4 11.6459  4.3445   1 
  -6  -5  -4 15.1074  3.0690  15 
  -7  -5  -4 7.02908 1.06437   2 
  -7  -5  -4 2.23037 2.38632   1 
  -7   6   4 10.6257  1.2913   6 
  -7   6   4 8.76352 1.03938   7 
  -7   6   4 10.0923  0.9969   4 
  -6   6   4 12.6721  1.8099   6 
  -6   6   4 10.7289  1.2887   4 
  -6   6   4 11.8447  1.7783   8 
  -6   6   4 13.3715  1.5145   7 
  -5   6   4 8.52644 1.23863   4 
  -5   6   4 10.2203  1.4940   7 
  -5   6   4 9.97622 1.83871   8 
  -5   6   4 12.2204  2.0084   6 
  -4   6   4 110.822   6.998   4 
  -4   6   4 122.289   7.768   7 
  -4   6   4 108.918   8.017   8 
  -4   6   4 120.511   8.760   6 
  -3   6   4 7.05197 1.57464   8 
  -3   6   4 11.0852  1.4190   4 
  -3   6   4 8.78397 1.24739  10 
  -3   6   4 7.84245 1.74854   6 
  -2   6   4 300.012  18.642   8 
  -1   6   4 511.367  40.949  12 
   0   6   4 106.774   9.644  12 
  -1  -6  -4 360.804  31.609   9 
  -1  -6  -4 425.889  24.126  13 
  -2  -6  -4 352.662  40.039   1 
   2   6   4 384.809  22.663   5 
  -3  -6  -4 56.1000  4.6628   2 
  -3  -6  -4 59.2510  4.8683  13 
  -3  -6  -4 55.2550  4.2495  14 
  -3  -6  -4 59.0353  9.1888   1 
  -4  -6  -4 13.4219  2.1347   2 
  -4  -6  -4 20.6807  5.7949   1 
  -4  -6  -4 19.8377  2.1277  14 
  -4  -6  -4 22.6219  4.0324  15 
  -5  -6  -4 21.3105  2.5069   2 
  -5  -6  -4 22.7430  5.7406   1 
  -5  -6  -4 21.7115  3.8439  15 
  -6  -6  -4 6.34595 3.30986   1 
  -6  -6  -4 6.71843 1.29030   2 
  -6  -6  -4 9.92190 2.22462  15 
  -6   7   4 41.4430  2.9056   7 
  -6   7   4 39.5294  2.6542   4 
  -6   7   4 45.3904  3.3902   6 
  -6   7   4 32.4158  3.0221   8 
  -5   7   4 6.29348 1.11254   7 
  -5   7   4 5.91756 1.42412   6 
  -5   7   4 7.17294 1.54746   8 
  -5   7   4 9.10885 1.18670   4 
  -4   7   4 28.7045  2.5102   7 
  -4   7   4 29.6897  3.2159   8 
  -4   7   4 29.7043  2.3608   4 
  -4   7   4 30.0550  3.1590   6 
  -3   7   4 15.7365  2.3191   8 
  -3   7   4 23.4612  1.9493   4 
  -3   7   4 18.0198  1.7741  10 
  -3   7   4 22.1721  2.8238   6 
  -2   7   4 87.7129  5.4282   4 
  -2   7   4 87.0424  6.1043  10 
  -2   7   4 84.9361  6.2906   8 
  -1   7   4 110.758   7.990   8 
  -1   7   4 127.572   8.283  10 
   0   7   4 23.7328  2.6726   8 
  -1  -7  -4 117.176   8.325  13 
  -1  -7  -4 129.336  15.178   1 
  -2  -7  -4 46.5062  4.0179  13 
  -2  -7  -4 42.6599  7.8520   1 
  -3  -7  -4 1.62323 0.99038   2 
  -3  -7  -4 0.46157 0.99662  14 
  -3  -7  -4 0.62824 2.87938   1 
  -4  -7  -4 29.1598  2.4154  14 
  -4  -7  -4 25.4217  6.0859   1 
  -5  -7  -4 -0.0767  2.4007   1 
  -5  -7  -4 0.14651 1.32298  15 
  -5  -7  -4 0.52225 0.78082   2 
  -6  -7  -4 8.07968 3.01660   1 
  -6  -7  -4 12.7988  2.0927  15 
  -6  -7  -4 11.1377  1.3897   2 
  -6   8   4 0.14798 0.36540   4 
  -6   8   4 -0.0598  0.4908   6 
  -5   8   4 1.12150 0.84854   6 
  -5   8   4 0.44880 0.53118   4 
  -5   8   4 -0.1079  0.4961   7 
  -5   8   4 0.41041 0.85293   8 
  -4   8   4 6.22831 1.43835   6 
  -4   8   4 4.69645 0.93287   4 
  -4   8   4 5.25195 1.40136   8 
  -3   8   4 80.9660  5.2928   4 
  -3   8   4 91.1595  6.3546   8 
  -3   8   4 85.1513  6.5924   6 
  -2   8   4 188.716  10.526   4 
  -2   8   4 181.175  11.920   8 
  -2   8   4 174.651  11.603  10 
  -1   8   4 5.45049 1.52348  10 
  -1   8   4 4.08321 1.30909   8 
   0  -8  -4 11.3998  1.9159  13 
   0   8   4 4.96841 1.35863   8 
  -1  -8  -4 4.59960 3.25837   1 
  -1  -8  -4 6.88854 1.54975  13 
   1   8   4 5.90243 1.29973   8 
  -2  -8  -4 116.183   7.756  13 
  -2  -8  -4 100.567   7.068  14 
  -2  -8  -4 112.163  14.112   1 
  -3  -8  -4 49.3276  3.7929  14 
  -3  -8  -4 54.0211  8.2547   1 
  -4  -8  -4 34.3347  2.4227  14 
  -4  -8  -4 32.8981  6.3714   1 
  -4  -8  -4 30.1596  2.8644   2 
  -5  -8  -4 0.65771 2.18918   1 
  -5  -8  -4 -0.1815  0.6160   2 
  -5   9   4 4.74945 0.69913   4 
  -5   9   4 6.05833 1.02896   6 
  -4   9   4 52.4762  3.7219   4 
  -4   9   4 65.5280  4.7429   6 
  -4   9   4 68.2719  4.6465   8 
  -3   9   4 12.8519  1.3952   4 
  -3   9   4 13.8160  1.9910   8 
  -2   9   4 42.6064  3.3885  10 
  -2   9   4 44.4764  3.7741   8 
   1  -9  -4 53.8114  4.0875  13 
  -1   9   4 42.0044  3.8680   8 
   0  -9  -4 175.531  11.027  13 
   0   9   4 162.696  10.961   8 
  -1  -9  -4 31.3512  5.8656   1 
  -1  -9  -4 30.7741  2.9413  13 
   1   9   4 31.6517  2.8650   8 
  -2  -9  -4 48.4451  7.6019   1 
  -3  -9  -4 26.2302  2.3082  14 
  -3  -9  -4 15.1913  4.3218   1 
  -4  -9  -4 45.5498  6.7226   1 
  -4  10   4 33.4426  2.7070   8 
  -3  10   4 16.4393  2.0184   8 
   2 -10  -4 3.93660 1.16902  13 
  -2  10   4 2.39007 0.77298  10 
  -2  10   4 2.28603 1.02970   8 
   1 -10  -4 25.7249  2.6393  13 
  -1  10   4 23.8968  2.6190   8 
  -1  10   4 25.6730  2.3878  10 
   0 -10  -4 63.1847  4.3626  13 
   0  10   4 54.6601  4.3596  10 
   0  10   4 52.8497  4.2339   8 
  -1 -10  -4 15.2686  3.8002   1 
   1  10   4 11.2312  1.6001   8 
  -2 -10  -4 4.02850 1.12532  14 
  -2 -10  -4 4.15810 2.50163   1 
  -3 -10  -4 33.8233  2.3887  14 
  -3 -10  -4 34.6842  5.3695   1 
  -2  11   4 32.8073  2.6488   8 
   1 -11  -4 38.2212  2.8472  13 
  -1  11   4 35.7870  2.6304  10 
  -1  11   4 32.3949  2.7726   8 
   0  11   4 20.7926  1.9953   8 
   0  11   4 24.2828  2.1091  10 
   1  11   4 48.7312  3.6523  10 
  -2 -11  -4 17.2030  1.6365  14 
   2  14  -5 0.71752 0.52473   8 
  -2 -14   5 0.24481 1.27952  15 
  -1 -14   5 60.4826  7.7281   1 
   0  14  -5 7.96119 1.17733   8 
   0  14  -5 6.93862 1.23453  10 
   0 -14   5 9.16804 2.72051   1 
  -1  14  -5 121.539   8.752   6 
  -1  14  -5 128.606   7.976  10 
  -2  14  -5 5.59314 1.12339   6 
   2 -14   5 2.12843 1.67130   1 
  -3  14  -5 2.91808 0.82185   6 
   3 -14   5 2.18470 1.46343   1 
  -4 -13   5 14.3432  2.3483  15 
   3  13  -5 18.3843  1.6724   8 
  -3 -13   5 20.9780  3.3370  15 
   2  13  -5 47.0027  3.1323   8 
  -2 -13   5 28.9296  5.8522   1 
  -2 -13   5 44.2306  5.1569  15 
   1  13  -5 2.28135 0.83507   8 
   1  13  -5 0.67913 0.94635   6 
  -1 -13   5 1.11058 1.76395  15 
  -1 -13   5 0.23879 2.07029   1 
   0  13  -5 31.1550  2.5784   8 
   0  13  -5 24.5732  2.8993   6 
   0 -13   5 27.7665  5.1858   1 
  -1  13  -5 -0.3955  0.8719   6 
  -1  13  -5 -0.4872  0.8471  10 
   1 -13   5 1.71800 2.11836   1 
  -2  13  -5 37.3559  3.7196   6 
  -2  13  -5 40.2362  3.1291  10 
   2 -13   5 47.8459  6.3271   1 
  -3  13  -5 26.0916  2.5904   6 
   3 -13   5 18.8989  4.0692   1 
   4 -13   5 11.0227  2.6508   1 
  -5 -12   5 15.8220  2.5078  15 
   4  12  -5 67.8999  4.4564   8 
  -4 -12   5 63.4846  7.0278  15 
   3  12  -5 6.17732 1.07076   8 
  -3 -12   5 4.15085 2.15326  15 
   2  12  -5 55.7882  3.8433   8 
  -2 -12   5 43.7575  6.0194  15 
   1  12  -5 13.8105  2.0104   6 
   1  12  -5 14.1135  1.6647   8 
  -1 -12   5 5.25972 3.02146   1 
  -1 -12   5 16.2556  3.2804  15 
   0  12  -5 32.0581  2.7269   8 
   0  12  -5 26.4486  3.1750   6 
   0 -12   5 40.2548  5.2576  15 
   0 -12   5 22.4359  5.0973   1 
  -1  12  -5 31.1002  3.2047  10 
  -1  12  -5 27.6105  3.3168   6 
   1 -12   5 25.3982  5.2526   1 
  -2  12  -5 94.9113  6.4990  10 
  -2  12  -5 90.4013  7.3173   6 
   2 -12   5 90.6766 11.5626   1 
  -3  12  -5 25.6515  3.1425   6 
   3 -12   5 27.0476  5.1620   1 
   4 -12   5 47.1258  6.6517   1 
  -5  12  -5 15.3109  1.8160   6 
  -5 -11   5 62.6499  4.7612   2 
  -5 -11   5 63.6791  6.8601  15 
  -4 -11   5 -1.1859  1.5838  15 
  -3 -11   5 85.0152  9.2783  15 
   2  11  -5 56.1253  4.3893   6 
  -2 -11   5 45.8859  6.2947  15 
   1  11  -5 139.125   9.682   6 
   1  11  -5 121.887   8.608   8 
  -1 -11   5 143.488  13.157  15 
   0  11  -5 21.0896  2.3687   8 
   0  11  -5 21.2074  2.8710   6 
   0 -11   5 30.0407  5.4460   1 
   0 -11   5 28.2776  4.4825  15 
  -1  11  -5 175.619  12.938   6 
  -1  11  -5 179.278  11.916  10 
   1 -11   5 184.736  20.507   1 
  -2  11  -5 48.4914  4.8239   6 
  -2  11  -5 50.4089  4.2434  10 
   2 -11   5 59.5739  7.9436   1 
  -3  11  -5 129.880   7.914  10 
  -3  11  -5 125.958   9.352   6 
   3 -11   5 107.050  14.478   1 
  -4  11  -5 37.1265  3.2570   7 
  -4  11  -5 44.2683  3.9506   6 
  -5  11  -5 26.9087  2.7376   6 
  -5  11  -5 26.5518  2.3865   7 
  -6  11  -5 6.51740 0.96229   7 
  -6 -10   5 29.1949  3.7443  15 
  -6 -10   5 25.9817  2.4253   2 
  -5 -10   5 5.01718 1.35353   2 
  -5 -10   5 6.54824 2.57506  15 
  -4 -10   5 23.3418  4.6247  15 
  -4 -10   5 25.9173  3.1549   2 
  -3 -10   5 57.8760  7.2088  15 
   2  10  -5 112.003   7.746   6 
  -2 -10   5 98.4247 10.7873  15 
   1  10  -5 60.9967  4.6755   6 
  -1 -10   5 44.8491  7.7160   1 
  -1 -10   5 60.3529  6.5991  15 
   0  10  -5 30.4903  3.2109   6 
   0  10  -5 30.7366  2.7721   8 
   0 -10   5 35.1452  5.6888   1 
   0 -10   5 36.9687  4.6596  15 
  -1  10  -5 57.8463  5.8152   6 
   1 -10   5 78.9437  7.8055  15 
   1 -10   5 84.0998  9.8291   1 
  -2  10  -5 194.379  20.812   1 
  -2  10  -5 183.561  13.574   6 
  -2  10  -5 178.038  12.314  10 
   2 -10   5 202.549  21.640   1 
  -3  10  -5 31.5269  2.7670  10 
  -3  10  -5 30.7759  3.7392   6 
  -3  10  -5 31.7409  4.9045   1 
  -4  10  -5 78.3588  5.9195   7 
  -4  10  -5 78.4226  6.5239   6 
  -4  10  -5 83.2432  9.7666   1 
  -5  10  -5 19.2912  2.2853   7 
  -5  10  -5 15.6977  1.6096   4 
  -5  10  -5 13.0565  3.0727   1 
  -5  10  -5 19.4496  2.4818   6 
  -6  10  -5 4.99352 0.81096   4 
  -6  10  -5 4.42208 1.04079   7 
   6 -10   5 1.69912 2.00935   1 
  -6  -9   5 9.79131 2.69723  15 
  -6  -9   5 10.8403  1.7063   2 
  -5  -9   5 25.6428  4.9998  15 
  -5  -9   5 29.1508  3.3834   2 
  -4  -9   5 239.310  16.525   2 
  -4  -9   5 235.823  14.482   8 
  -4  -9   5 241.539  14.177  11 
  -4  -9   5 216.062  21.722  15 
  -3  -9   5 11.3983  3.2748  15 
  -3  -9   5 10.5616  2.3168   2 
  -3  -9   5 18.0505  1.8501  11 
  -3  -9   5 12.9782  1.6160   8 
  -1  -9   5 14.5168  2.7797   9 
   0   9  -5 13.4509  2.4225   3 
   0  -9   5 26.0795  2.9439   9 
  -1   9  -5 43.1506  4.3595   3 
   1  -9   5 38.6632  4.1496   9 
  -2   9  -5 150.295  12.419   3 
  -3   9  -5 29.4107  3.5370   6 
  -3   9  -5 24.0136  4.5808   1 
  -3   9  -5 27.9720  3.1607   7 
  -3   9  -5 30.2973  2.6393  10 
  -4   9  -5 106.844   8.310   6 
  -4   9  -5 101.387   6.609   4 
  -4   9  -5 107.695  12.560   1 
  -4   9  -5 119.331   7.858   7 
  -5   9  -5 159.943  10.690   7 
  -5   9  -5 152.288   9.362   4 
  -5   9  -5 164.208  17.609   1 
  -6   9  -5 28.4901  2.7758   7 
  -6   9  -5 28.3784  2.3207   4 
  -6   9  -5 34.6873  4.5985   1 
  -7   9  -5 1.24234 0.50817   4 
  -7   9  -5 1.03229 0.58497   7 
  -7  -8   5 11.6384  1.6032   2 
  -6  -8   5 10.4819  1.8839   2 
  -6  -8   5 11.4960  1.3200   8 
  -6  -8   5 8.42156 2.90897  15 
  -5  -8   5 132.468   9.944   2 
  -5  -8   5 133.049   8.432   8 
  -5  -8   5 126.288  13.408  15 
  -4  -8   5 180.881  17.496  15 
  -4  -8   5 178.301  11.325   8 
  -4  -8   5 184.001  11.128  11 
  -4  -8   5 178.699  13.158   2 
  -3  -8   5 48.3206  4.5205   5 
  -3  -8   5 60.5710  3.9099  11 
  -3  -8   5 52.2231  3.8907   8 
  -2  -8   5 289.642  16.413  11 
  -2  -8   5 259.838  17.412   5 
   1   8  -5 212.451  15.021   3 
  -1  -8   5 176.633  16.061   9 
   0   8  -5 86.3248  7.8759   3 
   0  -8   5 106.557   8.419   9 
  -1   8  -5 214.820  17.370   3 
   1  -8   5 233.254  18.023   9 
  -2   8  -5 293.615  20.857   3 
   2  -8   5 247.790  21.272   9 
  -3   8  -5 188.108  15.142   3 
  -4   8  -5 387.798  40.254   1 
  -4   8  -5 399.431  24.093   7 
  -4   8  -5 365.961  21.534   4 
  -5   8  -5 54.2215  3.8416   4 
  -5   8  -5 54.0950  4.4967   7 
  -5   8  -5 48.9264  6.9022   1 
  -6   8  -5 10.2737  1.5671   4 
  -6   8  -5 10.3104  1.7593   7 
  -6   8  -5 14.6725  3.1447   1 
  -7   8  -5 54.0162  4.1234   7 
  -7   8  -5 58.8237  6.9824   1 
  -7   8  -5 60.4781  3.7556   4 
  -7  -7   5 51.3174  4.2510   2 
  -6  -7   5 26.8268  2.2352   8 
  -6  -7   5 26.6563  3.3140   2 
  -5  -7   5 243.820  13.965  11 
  -5  -7   5 218.574  16.212   2 
  -5  -7   5 216.009  21.251  15 
  -5  -7   5 231.045  14.182   8 
  -4  -7   5 31.0287  3.8129   5 
  -4  -7   5 40.9896  3.1233   8 
  -4  -7   5 41.5872  4.2357   2 
  -4  -7   5 41.3091  3.0991  11 
  -3  -7   5 83.7088  5.3683  11 
  -3  -7   5 76.9535  6.0581   5 
  -2  -7   5 10.3251  1.3141  11 
   1   7  -5 135.377   9.862   3 
  -1  -7   5 109.217  10.483   9 
  -1  -7   5 132.078   8.349   5 
   0   7  -5 75.1546  6.6959   3 
   0  -7   5 86.8537  7.0089   9 
  -1   7  -5 58.9811  6.2957   3 
   1  -7   5 91.9034  6.6487   9 
  -2   7  -5 116.231   9.111   3 
   2  -7   5 101.767   9.008   9 
  -3   7  -5 32.9659  3.6458   3 
   3  -7   5 29.7232  3.3058   9 
  -4   7  -5 45.4933  6.3550   1 
  -5   7  -5 555.449  53.996   1 
  -5   7  -5 485.866  31.860   7 
  -5   7  -5 510.147  29.001   4 
  -6   7  -5 10.5270  1.9065   7 
  -6   7  -5 13.2009  1.7746   4 
  -6   7  -5 13.3333  3.2051   1 
  -7   7  -5 45.2751  5.5797   1 
  -7   7  -5 40.9321  2.9397   4 
  -7   7  -5 34.6626  3.1502   7 
  -7  -6   5 14.7855  2.2255   2 
  -6  -6   5 32.2007  2.6643  11 
  -6  -6   5 33.3233  2.6665   8 
  -6  -6   5 32.2039  3.8504   2 
  -5  -6   5 252.905  18.391   2 
  -5  -6   5 264.992  16.141   8 
  -5  -6   5 265.212  15.778  11 
  -4  -6   5 238.257  13.499  11 
  -4  -6   5 224.239  13.804   8 
  -4  -6   5 200.496  14.449   5 
  -3  -6   5 91.7930  5.6831  11 
  -3  -6   5 80.8630  6.3062   5 
   2   6  -5 813.368  57.299   3 
  -2  -6   5 712.395  47.443   5 
  -2  -6   5 837.976  45.515  11 
   1   6  -5 146.775  10.137   3 
  -1  -6   5 115.159  10.697   9 
   0   6  -5 19.1182  2.2544   3 
   0  -6   5 20.9486  2.2628   9 
   0  -6   5 23.9538  2.0058   5 
  -1   6  -5 192.575  15.296   3 
   1  -6   5 207.079  15.879   9 
  -2   6  -5 664.215  47.345   3 
   2  -6   5 624.369  49.592   9 
  -3   6  -5 159.105  12.683   3 
   3  -6   5 158.447  12.978   9 
  -4   6  -5 64.2039  5.9494   3 
   4  -6   5 60.8119  5.8100   9 
  -5   6  -5 19.0751  2.3377   4 
  -5   6  -5 17.6113  2.4755   7 
  -5   6  -5 16.2169  3.8901   1 
  -6   6  -5 82.3731  5.3749   4 
  -6   6  -5 81.3765  5.8257   7 
  -6   6  -5 66.5917  9.4820   1 
  -7   6  -5 13.7317  1.6710   4 
  -7   6  -5 15.1015  3.4187   1 
  -7   6  -5 13.3713  1.8130   7 
  -7  -5   5 6.49022 1.03410   8 
  -7  -5   5 8.40984 1.82672   2 
  -6  -5   5 98.5102  7.9102   2 
  -6  -5   5 95.7509  6.4662   8 
  -5  -5   5 79.4931  5.0693  11 
  -5  -5   5 65.8476  6.2894   2 
  -5  -5   5 72.2355  5.1503   8 
  -4  -5   5 115.735   8.485   5 
  -4  -5   5 125.173   7.669  11 
   3   5  -5 65.7917  5.3719   3 
  -3  -5   5 72.4718  4.5226  11 
  -3  -5   5 65.2230  5.0922   5 
   2   5  -5 591.248  42.625   3 
  -2  -5   5 631.891  33.914  11 
  -2  -5   5 533.117  35.389   5 
   1   5  -5 473.453  32.405   3 
  -1  -5   5 395.273  34.228   9 
  -1  -5   5 463.763  26.851   5 
   0   5  -5 69.4407  5.7457   3 
   0  -5   5 71.4756  4.7493   5 
   0  -5   5 72.1604  5.9134   9 
  -1   5  -5 308.929  26.084   3 
   1  -5   5 395.941  27.447   9 
  -2   5  -5 802.126  56.505   3 
   2  -5   5 746.537  59.403   9 
  -3   5  -5 20.3350  2.7067   3 
   3  -5   5 18.7931  2.2693   9 
   4  -5   5 231.101  18.663   9 
  -5   5  -5 136.188   8.745   4 
  -5   5  -5 121.341   9.351   7 
  -5   5  -5 161.202  16.403   1 
  -6   5  -5 6.61246 1.57477   7 
  -6   5  -5 6.90487 1.48278   4 
  -6   5  -5 7.09762 2.90858   1 
  -7   5  -5 76.2923 10.0984   1 
  -7   5  -5 88.2985  5.4154   4 
  -8   5  -5 35.9296  2.4155   4 
  -7  -4   5 112.071   7.207   8 
  -6  -4   5 2.26289 0.90067   8 
  -6  -4   5 2.76193 1.74738   2 
  -5  -4   5 2.60276 1.44326   5 
  -5  -4   5 2.63383 1.69343   2 
  -5  -4   5 1.34740 0.73585  11 
  -5  -4   5 0.15265 0.75960   8 
   4   4  -5 122.246   9.550   3 
  -4  -4   5 126.646   7.782  11 
  -4  -4   5 126.284   8.712   5 
   3   4  -5 84.5375  7.0979   3 
  -3  -4   5 92.3738  6.4978   5 
  -3  -4   5 102.715   5.880  11 
   2   4  -5 502.355  36.144   3 
  -2  -4   5 512.498  28.730  11 
  -2  -4   5 474.003  30.051   5 
   1   4  -5 932.280  70.097   3 
  -1  -4   5 1009.75   57.77   5 
   0   4  -5 579.190  43.786   3 
   0  -4   5 579.118  35.951   5 
   0  -4   5 647.786  46.190   9 
  -1   4  -5 1079.70   82.22   3 
   1  -4   5 1191.29   86.77   9 
  -2   4  -5 350.552  27.270   3 
   2  -4   5 387.600  28.741   9 
  -3   4  -5 91.5655  7.3138   3 
   3  -4   5 84.5992  7.5162   9 
   4  -4   5 98.2648  8.5532   9 
  -5   4  -5 66.9307  9.0098   1 
  -6   4  -5 7.95371 1.62088   4 
  -6   4  -5 8.63319 2.06445  15 
  -6   4  -5 6.00824 3.15383   1 
  -7   4  -5 110.108   6.973   4 
  -7   4  -5 113.572  13.419   1 
  -8   4  -5 43.3141  5.5453   1 
  -8   4  -5 41.9957  2.7843   4 
  -7  -3   5 102.109   6.711   8 
  -6  -3   5 20.1371  2.3134   8 
  -5  -3   5 26.8717  3.2122   5 
  -5  -3   5 18.9685  2.2733   8 
  -5  -3   5 23.6011  1.9933  11 
   4   3  -5 17.9748  2.0289   3 
  -4  -3   5 20.5273  1.7395  11 
  -4  -3   5 21.7473  2.6834   5 
   3   3  -5 7.89803 1.19486   3 
  -3  -3   5 9.76043 1.10481  11 
  -3  -3   5 7.65087 1.44034   5 
   2   3  -5 1017.27   71.15   3 
  -2  -3   5 949.313  58.687   5 
   1   3  -5 1158.82   83.96   3 
  -1  -3   5 1168.77   69.08   5 
   0   3  -5 4252.20  321.59   3 
   0  -3   5 4392.32  263.76   5 
   0  -3   5 4774.79  340.20   9 
  -1   3  -5 1044.27   81.69   3 
   1  -3   5 1269.07   86.35   9 
   1  -3   5 1078.84   66.91   5 
  -2   3  -5 1419.73  100.33   3 
   2  -3   5 1363.58  106.03   9 
   2  -3   5 1379.90   82.06   5 
  -3   3  -5 10.7244  1.7036   3 
   3  -3   5 9.76296 1.71026   9 
   4  -3   5 53.4096  5.1690   9 
  -5   3  -5 60.1769  8.6326   1 
  -6   3  -5 177.776  10.313   4 
  -6   3  -5 142.048  19.220   1 
  -6   3  -5 178.118  15.091  15 
  -7   3  -5 144.330  18.556   1 
  -7   3  -5 181.624   9.855   4 
  -8   3  -5 22.2160  3.9205   1 
  -7  -2   5 106.904   7.070   8 
  -6  -2   5 131.152   9.458   6 
  -6  -2   5 139.184   8.927   8 
   5   2  -5 125.319   9.713   3 
  -5  -2   5 119.319   8.130   8 
   4   2  -5 1.38123 0.74179   3 
  -4  -2   5 3.29170 1.26285   5 
   3   2  -5 374.855  27.298   3 
  -3  -2   5 368.651  22.873   5 
   2   2  -5 375.760  26.677   3 
  -2  -2   5 351.326  22.174   5 
   1   2  -5 70.8024  5.6123   3 
  -1  -2   5 75.2525  4.8326   5 
   0   2  -5 286.101  21.264   3 
   0  -2   5 285.220  22.344   9 
   0  -2   5 302.153  17.568   5 
  -1   2  -5 96.5531  7.5187   3 
   1  -2   5 101.795   7.970   9 
   1  -2   5 97.7738  6.1716   5 
  -2   2  -5 270.291  18.430   3 
  -2   2  -5 251.540  19.721   9 
   2  -2   5 253.449  15.008   5 
   2  -2   5 217.788  19.442   9 
  -3   2  -5 661.258  49.935   9 
   3  -2   5 647.450  38.224   5 
   3  -2   5 617.533  49.630   9 
   4  -2   5 48.0140  4.8189   9 
  -5   2  -5 18.1872  4.9697   1 
  -6   2  -5 160.158  10.191   4 
  -6   2  -5 176.022  20.123   1 
  -6   2  -5 168.663  15.268  15 
  -7   2  -5 97.5183  6.5129   4 
  -7   2  -5 102.573   9.855  15 
  -7   2  -5 118.746  13.412   1 
  -8   2  -5 62.3267  7.7145   1 
  -7  -1   5 83.1963  6.0627   6 
  -7  -1   5 82.8124  5.7375   8 
  -6  -1   5 108.823   7.564   8 
  -6  -1   5 112.993   8.079   6 
   5   1  -5 244.327  17.953   3 
  -5  -1   5 226.721  14.784   8 
   4   1  -5 162.684  12.691   3 
  -4  -1   5 170.103  11.009   5 
   3   1  -5 805.500  59.187   3 
  -3  -1   5 826.305  48.967   5 
   2   1  -5 294.321  21.655   3 
  -2  -1   5 294.338  18.060   5 
   1   1  -5 1081.33   77.75   3 
  -1  -1   5 1070.65   63.93   5 
   0   1  -5 2035.01  146.22   3 
   0  -1   5 2170.34  120.03   5 
   0  -1   5 1890.14  157.36  12 
  -1   1  -5 1166.38   86.99   9 
  -1   1  -5 1078.51   82.00   3 
   1  -1   5 1167.09   67.34   5 
  -2   1  -5 153.247  13.032   9 
   2  -1   5 165.715   9.870   5 
  -3   1  -5 489.848  38.007   9 
   3  -1   5 479.170  28.990   5 
  -4   1  -5 134.617  11.441   9 
   4  -1   5 124.268   8.132   5 
  -5   1  -5 281.341  31.335   1 
  -6   1  -5 192.536  17.242  15 
  -6   1  -5 185.227  22.334   1 
  -7   1  -5 12.2639  2.5667  15 
  -7   1  -5 14.7462  4.4337   1 
  -8   1  -5 41.7310  5.7255   1 
  -7   0   5 61.9354  4.7461   8 
  -7   0   5 68.8438  5.0457   6 
  -6   0   5 274.599  18.007   6 
  -6   0   5 272.345  16.423   7 
  -6   0   5 248.243  16.576   8 
  -5   0   5 99.9647  6.9680   8 
   4   0  -5 158.749  12.276   3 
   3   0  -5 118.978   9.569   3 
  -3   0   5 130.790   8.271   5 
   2   0  -5 294.962  22.308   3 
  -2   0   5 311.315  18.585   5 
   1   0  -5 77.9563  6.1542   3 
  -1   0   5 82.9432  5.2300   5 
  -1   0   5 75.7401  6.8467  12 
   0   0  -5 52.9107  4.1004   3 
   0   0   5 47.9449  4.5947  12 
   0   0   5 54.7930  3.5080   5 
  -1   0  -5 108.026   9.245   9 
   1   0   5 112.741   9.182  12 
   1   0   5 116.836   7.080   5 
  -2   0  -5 312.750  25.695   9 
   2   0   5 336.743  19.673   5 
  -3   0  -5 163.725  13.876   9 
   3   0   5 165.480  10.265   5 
  -4   0  -5 358.573  27.334   9 
   4   0   5 316.316  20.336   5 
  -5   0  -5 72.6480 10.7389   1 
  -6   0  -5 63.7376  6.9622  15 
  -6   0  -5 54.0748 10.1502   1 
  -7   0  -5 76.0879 10.7521   1 
  -7   0  -5 81.0890  8.0345  15 
  -8   0  -5 3.71635 1.21447  15 
  -8   0  -5 4.54339 2.19388   1 
  -7   1   5 21.9465  2.4096   8 
  -7   1   5 25.3182  2.4289   6 
  -7   1   5 23.0101  2.0221   7 
  -6   1   5 26.7184  2.9590   6 
  -6   1   5 26.0982  2.9015   8 
  -6   1   5 23.4506  2.2642   7 
  -5   1   5 294.156  17.214   7 
  -5   1   5 265.624  17.316   8 
  -5   1   5 268.889  18.744   6 
   4  -1  -5 247.088  18.695   3 
   3  -1  -5 2.88019 0.89545   3 
   2  -1  -5 572.093  43.018   3 
  -2   1   5 618.523  35.545   5 
  -2   1   5 582.779  46.645  12 
   1  -1  -5 8.29970 1.20993   3 
  -1   1   5 8.65234 1.14494   5 
  -1   1   5 8.81197 1.61038  12 
   0  -1  -5 1362.38   94.42   3 
   0   1   5 1200.33  101.77  12 
   0   1   5 1365.10   77.57   5 
  -1  -1  -5 25.0575  2.9069   9 
   1   1   5 29.1863  2.8064  12 
   1   1   5 29.8849  2.1432   5 
  -2  -1  -5 376.525  31.410   9 
   2   1   5 419.348  24.062   5 
  -3  -1  -5 82.1829  7.9230   9 
   3   1   5 85.8367  5.6224   5 
  -4  -1  -5 101.509   9.333   9 
   4   1   5 90.7213  6.3271   5 
  -5  -1  -5 15.4261  5.2690   1 
  -5  -1  -5 13.7275  2.1474   2 
  -5  -1  -5 15.2624  3.4260  15 
  -6  -1  -5 109.583  14.632   1 
  -7  -1  -5 1.48413 2.73647   1 
  -7  -1  -5 0.83400 1.44638  15 
  -7   2   5 17.0146  1.6315   7 
  -7   2   5 19.8943  2.1554   8 
  -7   2   5 14.7225  1.9399   6 
  -6   2   5 103.736   7.722   8 
  -6   2   5 116.889   8.334   6 
  -6   2   5 115.581   7.512   7 
  -5   2   5 180.245  13.076   6 
  -5   2   5 193.167  11.955   7 
  -5   2   5 180.004  12.139   8 
  -5   2   5 191.579  10.777   4 
   4  -2  -5 10.5491  1.8845   3 
  -4   2   5 13.5128  2.1716   3 
  -3   2   5 467.095  34.497   3 
  -2   2   5 13.5743  1.8722   3 
  -2   2   5 13.2845  2.2948  12 
   1  -2  -5 102.028   7.697   3 
  -1   2   5 95.0045  8.5883  12 
  -1   2   5 99.7176  6.4086   5 
   0   2   5 291.751  16.135   5 
   0   2   5 237.356  21.201  12 
  -1  -2  -5 53.0931  5.5327   9 
   1   2   5 67.2265  4.1354   5 
  -2  -2  -5 19.7682  3.1473   9 
   2   2   5 21.0367  1.8194   5 
  -3  -2  -5 374.835  29.927   9 
   3   2   5 364.506  22.462   5 
  -4  -2  -5 14.9072  2.3194  13 
   4   2   5 13.7517  1.7516   5 
  -5  -2  -5 181.395  11.943   2 
  -5  -2  -5 133.605  20.041   1 
  -5  -2  -5 183.180  16.108  15 
  -6  -2  -5 64.9517  7.4658  15 
  -6  -2  -5 66.2866  5.3227   2 
  -7  -2  -5 106.765   9.107  15 
  -7  -2  -5 74.1765 11.4686   1 
  -7   3   5 73.6892  4.7265   7 
  -7   3   5 67.3884  5.2165   6 
  -7   3   5 67.6158  4.9172   8 
  -6   3   5 77.1294  6.3888   6 
  -6   3   5 87.5895  5.2367   4 
  -6   3   5 92.0697  6.2496   8 
  -6   3   5 81.1245  5.7814   7 
  -5   3   5 43.8847  3.9034   6 
  -5   3   5 37.5493  3.6065   8 
  -5   3   5 41.4739  3.3636   7 
  -5   3   5 40.5538  2.9808   4 
  -4   3   5 50.9397  4.1634   8 
  -3   3   5 129.665  10.356   3 
  -2   3   5 11.9037  1.8220   3 
  -2   3   5 11.7083  2.2761  12 
  -1   3   5 909.549  71.353  12 
   0   3   5 28.3282  2.2692   5 
   0   3   5 31.8760  3.2831  12 
  -1  -3  -5 921.073  77.449   9 
   1   3   5 1084.63   59.77   5 
  -2  -3  -5 65.7250  6.5602   9 
   2   3   5 63.5497  4.4639   5 
  -3  -3  -5 66.7086  6.9566   9 
   3   3   5 63.0304  4.5890   5 
  -4  -3  -5 23.5997  2.6795   2 
  -4  -3  -5 21.7200  2.1809  14 
  -4  -3  -5 21.8229  5.9969   1 
  -4  -3  -5 26.8590  3.1639  13 
   4   3   5 18.5140  2.2449   5 
  -5  -3  -5 124.939   9.133   2 
  -5  -3  -5 124.879  12.452  15 
  -6  -3  -5 35.5780  3.3912   2 
  -6  -3  -5 38.5273  7.7198   1 
  -6  -3  -5 37.2344  4.9870  15 
  -7  -3  -5 24.2171  2.1590   2 
  -7  -3  -5 16.4629  4.4862   1 
  -7  -3  -5 19.6842  3.1425  15 
  -7   4   5 6.00869 1.10141   6 
  -7   4   5 7.48269 0.88841   4 
  -7   4   5 5.75547 0.90500   7 
  -6   4   5 23.8335  1.9966   4 
  -6   4   5 20.7894  2.6138   6 
  -6   4   5 31.9222  3.0511   8 
  -6   4   5 26.7946  2.3061   7 
  -5   4   5 67.6212  4.3071   4 
  -5   4   5 63.4305  5.3738   6 
  -5   4   5 63.8809  5.0923   8 
  -5   4   5 64.7614  4.7672   7 
  -4   4   5 34.4054  3.0036   7 
  -4   4   5 34.2818  3.4784   6 
  -4   4   5 34.7022  3.3512   8 
  -4   4   5 39.1173  2.7587   4 
  -3   4   5 30.6424  2.9700   8 
  -3   4   5 32.4790  3.4079   3 
  -2   4   5 94.4901  8.7772  12 
  -1   4   5 106.985   9.519  12 
   0   4   5 28.4702  3.2858  12 
   1   4   5 75.7588  5.1125   5 
  -2  -4  -5 58.1606  6.4084   9 
   2   4   5 60.3659  4.2674   5 
  -3  -4  -5 92.8958  7.0665  13 
   3   4   5 100.544   6.647   5 
  -4  -4  -5 83.1706  6.2856  13 
  -4  -4  -5 82.0791  6.2521   2 
  -4  -4  -5 79.1542  8.6313  15 
  -4  -4  -5 87.6450 12.0763   1 
  -4  -4  -5 73.5241  5.1007  14 
  -5  -4  -5 1.51613 1.89718  15 
  -5  -4  -5 2.63094 1.11528   2 
  -5  -4  -5 3.29347 3.61883   1 
  -6  -4  -5 22.7548  3.7302  15 
  -6  -4  -5 20.2202  2.3674   2 
  -6  -4  -5 17.0334  5.1430   1 
  -7  -4  -5 2.20298 2.33633   1 
  -7  -4  -5 7.63641 1.11339   2 
  -7  -4  -5 5.75320 1.51461  15 
  -7   5   5 10.0183  0.9863   4 
  -7   5   5 10.3335  1.2950   6 
  -7   5   5 11.8583  1.1695   7 
  -6   5   5 19.0338  1.7892   7 
  -6   5   5 16.3206  2.1025   6 
  -6   5   5 19.5085  2.2736   8 
  -6   5   5 17.8458  1.7040   4 
  -5   5   5 18.6738  2.2007   7 
  -5   5   5 23.1784  1.9903   4 
  -5   5   5 29.0363  3.0876   6 
  -5   5   5 25.6553  2.8818   8 
  -4   5   5 123.878   9.082   8 
  -4   5   5 140.843   8.864   7 
  -4   5   5 143.783   8.088   4 
  -4   5   5 126.574   9.795   6 
  -3   5   5 169.994  10.662  10 
  -3   5   5 180.366  10.073   4 
  -3   5   5 167.089  11.270   8 
  -3   5   5 175.997  10.986   7 
  -3   5   5 166.410  12.157   6 
  -2   5   5 106.154   7.343   8 
  -1   5   5 8.03922 1.99566  12 
   0   5   5 1096.56   86.07  12 
   1   5   5 17.2328  2.8256  12 
  -2  -5  -5 114.967   8.450  13 
   2   5   5 129.019   8.103   5 
  -3  -5  -5 105.599   7.621   2 
  -3  -5  -5 103.235   6.737  14 
  -3  -5  -5 108.395   7.591  13 
  -3  -5  -5 92.6046 13.5665   1 
  -4  -5  -5 129.375   9.544  13 
  -4  -5  -5 133.133  13.226  15 
  -4  -5  -5 141.579   8.226  14 
  -4  -5  -5 153.734  17.978   1 
  -4  -5  -5 140.313   9.955   2 
  -5  -5  -5 6.61732 3.81584   1 
  -5  -5  -5 6.38751 1.41301   2 
  -5  -5  -5 6.06554 2.24728  15 
  -6  -5  -5 7.53604 2.07832  15 
  -6  -5  -5 5.04018 3.24529   1 
  -6  -5  -5 10.4924  1.5107   2 
  -6   6   5 7.15084 1.05262   7 
  -6   6   5 7.73453 1.28880   6 
  -6   6   5 7.01001 1.32435   8 
  -6   6   5 7.79349 0.98713   4 
  -5   6   5 4.79689 0.91070   4 
  -5   6   5 6.18784 1.46769   8 
  -5   6   5 5.10472 1.32365   6 
  -5   6   5 5.59498 1.06184   7 
  -4   6   5 55.7812  3.8824   4 
  -4   6   5 60.6790  4.9823   6 
  -4   6   5 58.8859  4.2361   7 
  -4   6   5 56.3382  4.6638   8 
  -3   6   5 124.423   8.458   8 
  -3   6   5 118.816   7.692  10 
  -3   6   5 120.414   7.363   4 
  -3   6   5 126.318   9.057   6 
  -2   6   5 60.0481  4.2254  10 
  -2   6   5 51.2799  3.6554   4 
  -2   6   5 50.7920  4.3173   8 
  -1   6   5 13.5401  2.0609   8 
  -1   6   5 17.1403  2.2972  10 
   0  -6  -5 2.49950 1.14561  13 
   0   6   5 1.23534 1.03525   8 
  -1  -6  -5 11.2803  1.9921  13 
  -2  -6  -5 27.3268  2.7473   2 
  -2  -6  -5 32.7048  3.4976  13 
  -2  -6  -5 28.0565  6.2946   1 
  -3  -6  -5 188.259  11.342  14 
  -3  -6  -5 197.807  13.333   2 
  -3  -6  -5 191.758  12.753  13 
  -4  -6  -5 22.2273  2.1397  14 
  -4  -6  -5 17.7142  5.2551   1 
  -4  -6  -5 16.0803  2.2115   2 
  -5  -6  -5 13.0462  4.2862   1 
  -5  -6  -5 10.7400  1.6877   2 
  -5  -6  -5 15.4757  2.8685  15 
  -6  -6  -5 18.3578  1.7494   2 
  -6  -6  -5 8.67031 3.39547   1 
  -6  -6  -5 19.4714  2.6240  15 
  -6   7   5 15.8098  1.3014   4 
  -6   7   5 16.3539  1.3846   7 
  -6   7   5 16.9072  1.6554   6 
  -5   7   5 14.7243  1.8953   8 
  -5   7   5 15.6502  1.4814   4 
  -5   7   5 11.3559  1.7249   6 
  -5   7   5 11.9478  1.4025   7 
  -4   7   5 36.6802  3.3419   6 
  -4   7   5 32.6021  2.5731   4 
  -4   7   5 34.3716  2.7430   7 
  -4   7   5 36.6379  3.2818   8 
  -3   7   5 20.8415  2.6032   8 
  -3   7   5 23.5173  2.0147   4 
  -2   7   5 292.224  16.192   4 
  -2   7   5 275.977  17.988   8 
  -2   7   5 290.056  17.777  10 
  -1   7   5 133.503   8.616  10 
  -1   7   5 118.282   7.385   4 
  -1   7   5 123.007   8.468   8 
   0  -7  -5 8.95387 1.78217  13 
   0   7   5 9.90540 1.70600   8 
  -1  -7  -5 154.821  10.309  13 
  -2  -7  -5 233.706  26.366   1 
  -2  -7  -5 230.585  14.894  13 
  -3  -7  -5 20.3795  2.4077  14 
  -3  -7  -5 17.0550  2.1495   2 
  -3  -7  -5 23.8847  2.8471  13 
  -3  -7  -5 14.7739  4.7332   1 
  -4  -7  -5 78.3734  4.7933  14 
  -4  -7  -5 66.0553 10.3866   1 
  -4  -7  -5 83.5317  5.8739   2 
  -5  -7  -5 0.87932 2.35204   1 
  -5  -7  -5 2.12966 0.80927   2 
  -5   8   5 11.9353  1.2415   4 
  -5   8   5 14.9820  1.6630   6 
  -5   8   5 16.0899  1.7677   8 
  -4   8   5 15.7032  1.9801   6 
  -4   8   5 14.2554  1.4898   4 
  -4   8   5 20.5085  2.2712   8 
  -3   8   5 89.1922  6.5019   8 
  -3   8   5 92.1070  5.5983   4 
  -2   8   5 4.19953 1.34081   8 
  -2   8   5 4.81037 1.14674  10 
  -2   8   5 4.10064 0.91817   4 
   1  -8  -5 74.0782  5.5171  13 
  -1   8   5 77.1772  5.4777  10 
  -1   8   5 65.9499  5.3550   8 
   0  -8  -5 1.91373 1.06742  13 
   0   8   5 0.01500 0.95579   8 
  -1  -8  -5 61.1802  4.8130  13 
  -2  -8  -5 29.8825  3.0131  14 
  -2  -8  -5 26.5721  3.0001  13 
  -2  -8  -5 25.7322  5.6214   1 
  -3  -8  -5 44.8390  3.4820  14 
  -3  -8  -5 52.1428  7.7366   1 
  -4  -8  -5 24.0729  2.1945   2 
  -4  -8  -5 21.5359  4.7608   1 
  -4  -8  -5 22.0360  1.6950  14 
  -5  -8  -5 12.3609  3.0952   1 
   4  -9  -5 127.561   7.029   4 
  -4   9   5 131.111   7.911   8 
  -4   9   5 106.832   6.860   4 
   3  -9  -5 29.7522  2.2269   4 
  -3   9   5 25.7632  2.5773   8 
   2  -9  -5 70.6111  5.3216  13 
  -2   9   5 73.2786  4.9106  10 
  -2   9   5 73.4855  5.3594   8 
   1  -9  -5 33.8716  3.1561  13 
  -1   9   5 40.5415  3.1887  10 
  -1   9   5 34.0822  3.1462   8 
   0  -9  -5 3.35330 1.21198  13 
   0   9   5 2.27694 1.12548  10 
   0   9   5 1.84937 0.99527   8 
  -1  -9  -5 22.2860  2.5106  13 
  -2  -9  -5 46.4204  6.9935   1 
  -2  -9  -5 47.0446  3.5264  14 
  -3  -9  -5 24.6103  4.8321   1 
  -3  -9  -5 28.9010  2.2073  14 
  -4  -9  -5 78.0834  9.4386   1 
  -3  10   5 42.3862  3.2003   8 
   2 -10  -5 99.9798  6.3977  13 
  -2  10   5 90.5160  6.3387   8 
   1 -10  -5 59.6166  4.2062  13 
  -1  10   5 48.3709  4.0401   8 
  -1  10   5 62.0801  4.0500  10 
   0 -10  -5 47.2729  3.3741  13 
   0  10   5 40.2514  3.2603  10 
   0  10   5 37.1994  3.1291   8 
  -1 -10  -5 57.1512  4.1554  13 
  -2 -10  -5 80.0674  4.9161  14 
   2  14  -6 6.04148 0.89215   8 
  -2 -14   6 5.89759 1.82725  15 
   1  14  -6 18.3535  1.8751   6 
   1  14  -6 17.2444  1.6571   8 
  -1 -14   6 19.4250  3.0939  15 
   0  14  -6 115.708   7.513   6 
   0  14  -6 94.8365  6.8280  10 
   0 -14   6 102.276  12.120   1 
  -1  14  -6 20.2185  1.8848  10 
  -1  14  -6 20.3912  2.1359   6 
  -2  14  -6 7.70169 1.32024   6 
   2 -14   6 4.66620 1.91747   1 
   3 -14   6 10.6931  2.4426   1 
   3  13  -6 26.1647  2.0400   8 
  -3 -13   6 22.9279  3.6592  15 
   2  13  -6 3.16597 0.78929   8 
  -2 -13   6 1.90270 1.73566  15 
   1  13  -6 124.182   8.218   8 
   1  13  -6 121.704   9.106   6 
  -1 -13   6 145.457  12.503  15 
   0  13  -6 9.86866 1.77618   6 
   0  13  -6 11.1050  1.5663   8 
   0 -13   6 14.7585  3.0072  15 
  -1  13  -6 132.325   9.036  10 
  -1  13  -6 124.846   9.880   6 
   1 -13   6 159.764  16.148   1 
  -2  13  -6 1.41628 1.02926   6 
  -2  13  -6 1.98469 0.82630  10 
   2 -13   6 2.05590 1.94608   1 
  -3  13  -6 36.4266  3.0626   6 
   3 -13   6 22.2591  4.6083   1 
   4 -13   6 16.2031  3.1588   1 
  -5 -12   6 4.05873 1.50190  15 
  -4 -12   6 23.2688  3.8335  15 
  -3 -12   6 17.5400  3.5950  15 
   2  12  -6 111.506   7.909   6 
   2  12  -6 119.287   7.186   8 
  -2 -12   6 90.9879 10.7044  15 
   1  12  -6 50.1865  3.7905   8 
   1  12  -6 51.8564  4.3591   6 
  -1 -12   6 50.7008  6.1951  15 
   0  12  -6 16.3961  2.0070   8 
   0  12  -6 18.9551  2.5848   6 
   0 -12   6 20.2036  3.7735  15 
   0 -12   6 22.3733  4.6394   1 
  -1  12  -6 67.9230  6.0931   6 
  -1  12  -6 65.9120  5.5243  10 
   1 -12   6 84.8698  8.0819  15 
   1 -12   6 83.8251  9.9707   1 
  -2  12  -6 103.230   8.373   6 
  -2  12  -6 99.5118  7.3839  10 
   2 -12   6 130.083  13.597   1 
  -3  12  -6 13.4856  2.1468   6 
   3 -12   6 10.5889  3.3651   1 
  -4  12  -6 40.9015  3.3655   6 
   4 -12   6 25.9309  5.2729   1 
  -5  12  -6 7.22877 1.19031   6 
  -5  12  -6 6.24450 0.90683   7 
   5 -12   6 2.00931 1.68115   1 
  -5 -11   6 20.8019  2.1333   2 
  -5 -11   6 20.8732  3.4946  15 
  -4 -11   6 9.84443 2.92877  15 
  -3 -11   6 11.1997  3.0470  15 
   2  11  -6 114.423   7.688   6 
  -2 -11   6 90.5397 10.4906  15 
   1  11  -6 6.05307 1.41390   6 
  -1 -11   6 6.33642 2.38682  15 
   0  11  -6 94.0339  7.5664   6 
   0 -11   6 91.0847 12.0989   1 
   0 -11   6 115.361  10.305  15 
  -1  11  -6 7.63796 1.85193   6 
  -1  11  -6 8.19168 1.81284  10 
   1 -11   6 8.70024 3.20553   1 
   1 -11   6 10.9040  2.7780  15 
  -2  11  -6 153.330  11.917   6 
  -2  11  -6 160.281  10.822  10 
   2 -11   6 178.467  19.058   1 
  -3  11  -6 21.7155  2.8695   6 
  -3  11  -6 19.7518  2.0853  10 
   3 -11   6 21.4782  4.8469   1 
  -4  11  -6 1.44033 1.45549   1 
  -4  11  -6 2.65675 1.05247   7 
  -4  11  -6 1.20173 1.16594   6 
   4 -11   6 0.17302 1.98684   1 
  -5  11  -6 20.3888  1.9019   7 
   5 -11   6 5.33894 2.58654   1 
  -6 -10   6 5.40995 1.08788   2 
  -6 -10   6 5.72156 1.78978  15 
  -5 -10   6 -0.3623  0.8743   2 
  -5 -10   6 0.67867 1.88464  15 
  -4 -10   6 56.1906  7.3233  15 
  -4 -10   6 63.9120  5.2731   2 
   3  10  -6 18.3738  2.0951   6 
  -3 -10   6 16.2482  3.8479  15 
   2  10  -6 338.754  20.882   6 
  -2 -10   6 280.293  27.530  15 
   1  10  -6 117.362   8.399   6 
  -1 -10   6 113.425  11.411  15 
   0  10  -6 46.2769  4.3165   6 
   0 -10   6 50.2975  5.9265  15 
   0 -10   6 54.4994  7.5203   1 
  -1  10  -6 140.324  11.530   6 
   1 -10   6 196.213  18.904   1 
   1 -10   6 154.488  14.877  15 
  -2  10  -6 303.233  20.199  10 
  -2  10  -6 319.402  22.180   6 
  -2  10  -6 300.996  34.210   1 
   2 -10   6 386.756  35.460   1 
  -3  10  -6 59.9701  4.9588   7 
  -3  10  -6 63.1611  8.1697   1 
  -3  10  -6 67.7894  4.7429  10 
  -3  10  -6 67.0697  5.6444   6 
  -4  10  -6 101.962   7.551   6 
  -4  10  -6 90.9700 11.1914   1 
  -4  10  -6 95.6279  6.8828   7 
  -5  10  -6 3.32861 1.71306   1 
  -5  10  -6 3.13807 1.19598   7 
  -5  10  -6 1.43955 0.72482   4 
  -6  10  -6 36.2803  4.8443   1 
  -6  10  -6 41.1476  3.0601   7 
  -6  10  -6 34.9796  2.4655   4 
  -6  -9   6 65.4957  5.1603   2 
  -5  -9   6 14.1248  2.3057   2 
  -5  -9   6 10.7901  3.3276  15 
  -5  -9   6 13.5789  1.5696   8 
  -4  -9   6 42.1488  4.1104   2 
  -4  -9   6 38.5800  3.0377   8 
  -4  -9   6 34.6552  6.0085  15 
  -3  -9   6 71.6494  8.5256  15 
  -3  -9   6 70.8906  6.3145   2 
  -3  -9   6 79.2124  5.1909   8 
  -2  -9   6 5.36311 1.04246   8 
   0   9  -6 37.5317  4.2788   3 
   0  -9   6 52.2411  4.7766   9 
  -1   9  -6 73.7811  7.3379   3 
   1  -9   6 92.6678  7.5822   9 
  -2   9  -6 5.54382 1.47319  10 
  -2   9  -6 3.96220 1.92881   1 
  -3   9  -6 70.8206  6.2064   6 
  -3   9  -6 73.6455  5.7997   7 
  -3   9  -6 83.1859  9.4622   1 
  -3   9  -6 75.2942  5.4011  10 
  -4   9  -6 90.2411 10.9599   1 
  -4   9  -6 95.5363  6.9176   7 
  -5   9  -6 78.9014  5.3018   4 
  -5   9  -6 97.1165  6.4231   7 
  -5   9  -6 78.7988  9.9204   1 
  -6   9  -6 48.3420  3.2123   4 
  -6   9  -6 44.4806  3.7118   7 
  -6   9  -6 44.5336  5.9648   1 
  -7   9  -6 6.74959 0.84190   4 
  -7   9  -6 6.84604 0.99737   7 
  -7  -8   6 5.95379 1.17202   2 
  -6  -8   6 24.8311  2.0518   8 
  -6  -8   6 25.0953  3.0102   2 
  -5  -8   6 99.8841  6.5100   8 
  -5  -8   6 94.4799 10.5580  15 
  -5  -8   6 98.2167  7.8423   2 
  -4  -8   6 97.5902  8.2477   2 
  -4  -8   6 111.035   6.936   8 
  -4  -8   6 98.5065 11.1581  15 
  -4  -8   6 104.189   7.361   6 
  -3  -8   6 80.3427  6.2237   5 
  -3  -8   6 78.5456  6.7305   2 
  -3  -8   6 82.5950  5.5003   8 
  -2  -8   6 13.6779  2.1846   5 
   1   8  -6 1.57538 0.94495   3 
   0   8  -6 82.0482  7.7498   3 
   0  -8   6 105.815   8.238   9 
  -1   8  -6 3.02694 1.28062   3 
   1  -8   6 0.51424 0.77187   9 
  -2   8  -6 9.68793 2.22217   3 
   2  -8   6 11.2867  1.9563   9 
  -3   8  -6 54.7560  7.1611   1 
  -3   8  -6 54.8987  4.1255  10 
  -4   8  -6 250.827  24.277   1 
  -4   8  -6 221.875  14.599   7 
  -4   8  -6 195.841  12.838   4 
  -5   8  -6 50.8691  4.3369   7 
  -5   8  -6 50.4964  3.7049   4 
  -5   8  -6 45.3094  6.5514   1 
  -6   8  -6 34.5317  5.2013   1 
  -6   8  -6 35.3815  3.2767   7 
  -6   8  -6 39.6509  2.9147   4 
  -7   8  -6 38.4020  2.6205   4 
  -7   8  -6 37.0760  2.9157   7 
  -7   8  -6 37.1100  4.9116   1 
  -7  -7   6 33.7430  3.1489   2 
  -7  -7   6 34.6087  2.4382   8 
  -6  -7   6 16.6518  1.7552   8 
  -6  -7   6 17.6197  2.6769   2 
  -5  -7   6 12.5851  2.5208   2 
  -5  -7   6 12.1728  1.5712   8 
  -4  -7   6 345.595  24.081   6 
  -4  -7   6 411.385  21.859  11 
  -4  -7   6 351.138  25.068   2 
  -4  -7   6 334.852  32.295  15 
  -4  -7   6 388.275  22.340   8 
  -3  -7   6 25.4480  2.2013  11 
  -3  -7   6 25.4889  3.1170   5 
   2   7  -6 208.329  14.961   3 
  -2  -7   6 182.645  12.729   5 
   1   7  -6 338.037  25.901   3 
  -1  -7   6 361.367  21.574   5 
   0   7  -6 166.041  13.934   3 
   0  -7   6 195.329  14.611   9 
  -1   7  -6 289.702  23.285   3 
   1  -7   6 325.855  24.278   9 
  -2   7  -6 351.535  25.307   3 
   2  -7   6 316.438  26.102   9 
  -3   7  -6 31.0687  3.8336   3 
   3  -7   6 23.3682  2.9076   9 
  -4   7  -6 383.831  32.024  15 
  -4   7  -6 389.668  39.956   1 
  -4   7  -6 365.947  21.429   4 
  -4   7  -6 376.311  23.810   7 
  -5   7  -6 43.9671  4.1776   7 
  -5   7  -6 54.2095  6.9478   1 
  -5   7  -6 46.4367  3.7771   4 
  -6   7  -6 16.1658  3.7303   1 
  -6   7  -6 19.9045  2.2179   4 
  -6   7  -6 21.0150  2.5012   7 
  -7   7  -6 47.6815  5.9356   1 
  -7   7  -6 41.8976  3.4114   7 
  -7   7  -6 44.3740  3.1497   4 
  -7  -6   6 14.8334  2.1871   2 
  -7  -6   6 12.9184  1.3648   8 
  -6  -6   6 19.7912  1.8690   8 
  -6  -6   6 15.5942  2.7745   2 
  -5  -6   6 109.552   7.070   8 
  -5  -6   6 96.5754  8.3876   2 
  -5  -6   6 106.327   7.445   6 
  -4  -6   6 90.9821  6.2136   8 
  -4  -6   6 95.2908  6.0591  11 
  -4  -6   6 93.2869  7.5400   2 
  -4  -6   6 86.2535  6.8239   5 
   3   6  -6 213.525  16.471   3 
  -3  -6   6 240.755  13.334  11 
  -3  -6   6 206.263  14.250   5 
   2   6  -6 49.5907  4.1243   3 
  -2  -6   6 46.2145  3.8659   5 
   1   6  -6 162.561  12.968   3 
  -1  -6   6 181.880  11.008   5 
   0   6  -6 25.3011  2.7620   3 
   0  -6   6 29.0789  2.3399   5 
   0  -6   6 26.7964  2.7119   9 
  -1   6  -6 178.005  14.347   3 
   1  -6   6 193.370  14.839   9 
  -2   6  -6 5.08723 1.38955   3 
   2  -6   6 6.17413 1.25844   9 
  -3   6  -6 497.575  36.531   3 
   3  -6   6 481.747  38.136   9 
  -4   6  -6 59.7993  5.8127   3 
  -4   6  -6 59.8255  7.8725   1 
  -5   6  -6 69.1275  5.7538   7 
  -5   6  -6 74.9052  7.3250  15 
  -5   6  -6 78.4758  9.6096   1 
  -5   6  -6 75.8292  5.3284   4 
  -6   6  -6 40.3127  3.8146   7 
  -6   6  -6 52.3477  6.8733   1 
  -6   6  -6 44.8293  3.6382   4 
  -7   6  -6 32.2869  2.5716   4 
  -7   6  -6 28.4493  4.7825   1 
  -7   6  -6 35.8171  2.8547   7 
  -7  -5   6 59.6735  5.1020   2 
  -7  -5   6 61.2117  4.1374   8 
  -6  -5   6 35.3166  2.9965   8 
  -6  -5   6 42.0948  4.2164   2 
  -5  -5   6 121.540   8.491   6 
  -5  -5   6 120.572   7.985   8 
  -5  -5   6 118.897   9.543   2 
  -4  -5   6 5.47568 1.05167  11 
  -4  -5   6 5.38058 1.56351   5 
   3   5  -6 503.686  36.053   3 
  -3  -5   6 480.855  30.288   5 
   2   5  -6 261.698  18.280   3 
  -2  -5   6 226.732  15.410   5 
   1   5  -6 485.772  39.070   3 
  -1  -5   6 593.292  32.448   5 
   0   5  -6 33.2710  3.4981   3 
   0  -5   6 40.7669  3.5856   9 
   0  -5   6 47.4039  3.1099   5 
  -1   5  -6 711.444  53.275   3 
   1  -5   6 739.862  43.532   5 
   1  -5   6 737.711  56.023   9 
  -2   5  -6 237.938  17.728   3 
   2  -5   6 227.895  18.395   9 
  -3   5  -6 247.994  18.513   3 
   3  -5   6 234.183  19.206   9 
   4  -5   6 11.5053  2.0811   9 
  -5   5  -6 150.882  16.402   1 
  -5   5  -6 154.860   8.985   4 
  -5   5  -6 128.922  12.496  15 
  -5   5  -6 127.476   9.482   7 
  -6   5  -6 7.94334 1.70115   7 
  -6   5  -6 5.93226 2.74024   1 
  -6   5  -6 8.73404 1.62864   4 
  -6   5  -6 7.76393 1.91469  15 
  -7   5  -6 54.5498  8.0417   1 
  -7   5  -6 72.1641  4.4036   4 
  -7  -4   6 26.6452  2.2582   8 
  -6  -4   6 18.2398  2.1066   8 
  -6  -4   6 18.0598  2.0478   6 
  -6  -4   6 15.0705  2.8171   2 
  -5  -4   6 7.52760 1.32526   6 
  -5  -4   6 7.30709 1.40686   8 
  -5  -4   6 8.94539 2.34425   2 
   4   4  -6 89.1946  7.1422   3 
  -4  -4   6 90.6410  6.7630   5 
   3   4  -6 85.4556  6.7237   3 
  -3  -4   6 85.1778  6.1814   5 
   2   4  -6 184.179  13.457   3 
  -2  -4   6 173.842  11.463   5 
   1   4  -6 1613.05  120.52   3 
  -1  -4   6 1731.10   99.13   5 
   0   4  -6 3613.38  262.75   3 
   0  -4   6 3688.75  215.52   5 
  -1   4  -6 1584.14  121.66   3 
   1  -4   6 1631.15   99.68   5 
   1  -4   6 1836.49  128.48   9 
  -2   4  -6 222.770  16.839   3 
   2  -4   6 221.773  17.616   9 
  -3   4  -6 177.773  13.505   3 
   3  -4   6 168.385  14.062   9 
   4  -4   6 60.9748  5.8007   9 
  -5   4  -6 245.687  16.744   7 
  -5   4  -6 243.888  22.651  15 
  -5   4  -6 262.791  15.499   4 
  -5   4  -6 310.711  29.352   1 
  -6   4  -6 28.8468  3.1041   4 
  -6   4  -6 36.8487  6.5539   1 
  -6   4  -6 33.5579  4.0760  15 
  -7   4  -6 15.5222  1.9136   4 
  -7   4  -6 16.4090  4.0061   1 
  -7   4  -6 16.8025  2.6243  15 
  -8   4  -6 4.15533 1.74923   1 
  -6  -3   6 17.4329  2.1008   8 
  -6  -3   6 13.9688  1.8489   6 
  -5  -3   6 342.407  22.046   8 
  -5  -3   6 357.525  24.836   2 
  -5  -3   6 383.522  23.940   6 
  -5  -3   6 357.771  22.942   5 
   4   3  -6 14.6671  1.9481   3 
  -4  -3   6 17.7535  2.5643   5 
   3   3  -6 74.3729  5.9700   3 
  -3  -3   6 74.4915  5.5003   5 
   2   3  -6 391.521  28.348   3 
  -2  -3   6 381.983  23.661   5 
   1   3  -6 32.6308  2.9269   3 
  -1  -3   6 36.5785  2.7008   5 
   0   3  -6 4541.43  339.04   3 
   0  -3   6 4888.75  278.14   5 
  -1   3  -6 60.6868  4.9555   3 
   1  -3   6 59.0373  4.0338   5 
   1  -3   6 61.4706  5.1091   9 
  -2   3  -6 539.851  38.844   3 
   2  -3   6 519.352  31.686   5 
   2  -3   6 532.030  41.010   9 
   3  -3   6 34.0768  3.5665   9 
   4  -3   6 21.5148  3.0479   9 
  -5   3  -6 211.835  13.259   4 
  -5   3  -6 213.498  19.473  15 
  -5   3  -6 245.834  25.362   1 
  -6   3  -6 185.949  25.009   1 
  -6   3  -6 224.002  13.377   4 
  -6   3  -6 260.682  20.006  15 
  -7   3  -6 20.2236  2.1598   4 
  -7   3  -6 18.1211  2.9381  15 
  -7   3  -6 16.2758  4.2634   1 
  -8   3  -6 19.5673  3.4149   1 
  -7  -2   6 26.4062  2.3756   6 
  -7  -2   6 24.8978  2.3369   8 
  -6  -2   6 198.759  12.617   8 
  -6  -2   6 197.132  13.545   6 
  -5  -2   6 48.3574  4.1008   8 
  -5  -2   6 56.9647  4.4194   6 
   4   2  -6 48.5891  4.3235   3 
  -4  -2   6 50.0876  4.3250   5 
   3   2  -6 247.111  18.856   3 
  -3  -2   6 262.048  16.084   5 
   2   2  -6 68.4548  5.5429   3 
  -2  -2   6 70.8215  4.9704   5 
   1   2  -6 454.164  32.782   3 
  -1  -2   6 444.006  27.129   5 
   0   2  -6 3824.17  281.55   3 
   0  -2   6 4005.66  231.02   5 
  -1   2  -6 573.363  42.718   3 
   1  -2   6 567.312  35.076   5 
   1  -2   6 621.887  45.187   9 
  -2   2  -6 8.45923 1.76970   9 
   2  -2   6 9.17970 1.11309   5 
   2  -2   6 9.77426 1.62586   9 
  -3   2  -6 463.808  34.764   9 
   3  -2   6 427.265  34.389   9 
   3  -2   6 431.011  26.427   5 
   4  -2   6 40.0150  4.2866   9 
  -5   2  -6 42.2477  3.6640   4 
  -5   2  -6 36.5433  7.6819   1 
  -5   2  -6 50.1219  5.3428  15 
  -6   2  -6 48.3494  5.5596  15 
  -6   2  -6 49.1842  8.0852   1 
  -6   2  -6 46.5297  3.8243   4 
  -7   2  -6 8.49256 1.45024   4 
  -7   2  -6 7.81748 3.32791   1 
  -7   2  -6 7.97063 2.05753  15 
  -8   2  -6 41.4805  5.4769   1 
  -7  -1   6 44.2339  3.5714   6 
  -7  -1   6 44.0280  3.4726   8 
  -6  -1   6 48.3390  4.1104   6 
  -6  -1   6 49.4123  3.9806   8 
  -5  -1   6 22.2641  2.6680   6 
  -5  -1   6 23.4416  2.6856   8 
  -5  -1   6 25.1629  2.1862   7 
   4   1  -6 37.9497  3.5666   3 
   3   1  -6 30.5550  2.9503   3 
  -3  -1   6 34.4436  3.0298   5 
   2   1  -6 774.819  56.073   3 
  -2  -1   6 769.599  46.350   5 
   1   1  -6 788.224  56.296   3 
  -1  -1   6 763.954  46.387   5 
   0   1  -6 7.06006 1.03164   3 
   0  -1   6 6.97374 0.99594   5 
  -1   1  -6 652.562  48.660   3 
  -1   1  -6 674.905  51.725   9 
   1  -1   6 687.407  40.056   5 
  -2   1  -6 814.532  64.571   9 
   2  -1   6 858.810  49.848   5 
  -3   1  -6 37.4749  4.0655   9 
   3  -1   6 34.4994  2.6661   5 
  -4   1  -6 132.403  10.990   9 
   4  -1   6 111.397   7.659   5 
  -5   1  -6 129.876   8.717   4 
  -5   1  -6 148.499  13.159  15 
  -6   1  -6 99.9185 10.6785  15 
  -6   1  -6 144.405  15.276   1 
  -6   1  -6 103.093   7.120   4 
  -7   1  -6 190.077  14.800  15 
  -7   1  -6 131.979  18.413   1 
  -7   0   6 118.145   7.633   8 
  -7   0   6 112.173   8.079   6 
  -6   0   6 143.345   9.166   7 
  -6   0   6 141.952  10.160   6 
  -5   0   6 93.1884  6.7189   8 
  -5   0   6 97.4506  6.3803   7 
  -5   0   6 91.7641  7.1029   6 
   4   0  -6 277.249  20.862   3 
   3   0  -6 323.948  24.664   3 
  -3   0   6 343.693  20.735   5 
   2   0  -6 964.657  72.205   3 
  -2   0   6 1030.74   59.60   5 
   1   0  -6 44.2624  3.5719   3 
  -1   0   6 41.4523  3.1219   5 
  -1   0   6 37.7538  4.0614  12 
   0   0  -6 474.433  33.163   3 
   0   0   6 479.285  27.405   5 
   0   0   6 412.493  35.891  12 
  -1   0  -6 46.0409  4.3097   9 
   1   0   6 46.2501  3.2493   5 
  -2   0  -6 1083.90   90.11   9 
   2   0   6 1259.84   69.69   5 
  -3   0  -6 267.247  21.763   9 
   3   0   6 265.722  16.345   5 
  -4   0  -6 298.240  23.519   9 
   4   0   6 270.120  17.341   5 
  -5   0  -6 50.9002  6.3914  15 
  -5   0  -6 55.5858  4.3387   4 
  -5   0  -6 55.2676 10.0837   1 
  -5   0  -6 63.1680  4.7727   2 
  -6   0  -6 103.421  15.356   1 
  -6   0  -6 138.061  12.069  15 
  -7   0  -6 5.74038 1.85301  15 
  -7   0  -6 5.02063 3.10491   1 
  -7   1   6 35.7326  2.9323   6 
  -7   1   6 29.6904  2.4644   7 
  -7   1   6 35.4653  2.8948   8 
  -6   1   6 17.0491  1.9151   7 
  -6   1   6 22.1429  2.5602   6 
  -6   1   6 17.7199  2.3673   8 
  -5   1   6 119.725   8.615   6 
  -5   1   6 111.540   8.022   8 
  -5   1   6 116.821   7.708   7 
   4  -1  -6 52.1234  4.5003   3 
  -4   1   6 42.9942  3.8409   8 
   3  -1  -6 65.4616  5.5377   3 
   2  -1  -6 353.816  27.153   3 
  -2   1   6 385.478  22.633   5 
   1  -1  -6 83.3580  6.6033   3 
  -1   1   6 89.7275  5.6699   5 
  -1   1   6 77.8421  7.4310  12 
   0   1   6 2642.13  148.31   5 
   0   1   6 2375.74  194.60  12 
   1   1   6 73.9209  6.4803  12 
   1   1   6 74.9833  4.9785   5 
  -2  -1  -6 122.504  11.286   9 
   2   1   6 141.358   8.505   5 
  -3  -1  -6 6.27039 2.01975   9 
   3   1   6 6.74606 1.13044   5 
   4   1   6 27.2015  2.4451   5 
  -5  -1  -6 60.9092 10.2043   1 
  -5  -1  -6 53.5873  6.3101  15 
  -5  -1  -6 47.9144  4.3563   2 
  -6  -1  -6 246.654  21.624  15 
  -6  -1  -6 270.027  16.516   2 
  -6  -1  -6 197.678  27.205   1 
  -7  -1  -6 26.7725  5.4790   1 
  -7  -1  -6 23.2014  3.6016  15 
  -7   2   6 26.6368  2.3618   6 
  -7   2   6 25.7892  2.3406   8 
  -7   2   6 23.0759  1.9884   7 
  -6   2   6 268.578  17.103   8 
  -6   2   6 276.063  18.442   6 
  -6   2   6 272.455  16.848   7 
  -5   2   6 66.7562  5.3254   8 
  -5   2   6 71.8710  5.6643   6 
  -5   2   6 67.3299  4.4528   4 
  -5   2   6 71.9576  5.0200   7 
  -4   2   6 46.8225  3.9599   8 
   3  -2  -6 286.666  21.507   3 
   2  -2  -6 48.9620  4.3320   3 
  -2   2   6 50.3437  5.1943  12 
  -1   2   6 160.579  14.065  12 
  -1   2   6 173.426  10.590   5 
   0   2   6 94.3652  9.2097  12 
   0   2   6 120.270   7.010   5 
   1   2   6 148.399   9.073   5 
   1   2   6 136.979  11.898  12 
  -2  -2  -6 31.1779  3.8697   9 
   2   2   6 30.7437  2.5097   5 
  -3  -2  -6 254.688  20.851   9 
   3   2   6 242.004  15.374   5 
  -4  -2  -6 5.77150 2.26219  15 
  -4  -2  -6 4.90755 1.13728  14 
  -4  -2  -6 5.26361 1.72978  13 
  -4  -2  -6 3.54254 1.21696   2 
  -4  -2  -6 5.91099 4.01719   1 
   4   2   6 5.40868 1.18678   5 
  -5  -2  -6 164.919  16.349  15 
  -5  -2  -6 186.267  12.445   2 
  -6  -2  -6 24.9715  6.4665   1 
  -6  -2  -6 32.2237  3.0799   2 
  -6  -2  -6 36.5011  4.6037  15 
  -7  -2  -6 53.9594  5.5138  15 
  -7  -2  -6 49.5715  7.4971   1 
  -7   3   6 26.0882  1.9400   7 
  -7   3   6 20.8761  2.0905   8 
  -7   3   6 23.6452  2.1718   6 
  -6   3   6 28.3777  2.5784   6 
  -6   3   6 21.6747  2.5522   8 
  -6   3   6 22.4290  2.0792   7 
  -6   3   6 19.2998  1.8106   4 
  -5   3   6 159.339   9.884   7 
  -5   3   6 154.544   8.936   4 
  -5   3   6 141.755  10.103   8 
  -5   3   6 149.300  10.864   6 
  -4   3   6 85.2945  6.0119   7 
  -4   3   6 88.5937  6.3719   8 
  -4   3   6 88.3043  6.7645   6 
  -4   3   6 86.5608  5.4492   4 
   3  -3  -6 212.410  16.250   3 
  -3   3   6 212.849  13.597   8 
  -2   3   6 325.036  26.666  12 
  -1   3   6 22.8182  3.3051  12 
   0   3   6 228.110  13.417   5 
   0   3   6 202.797  17.779  12 
   1   3   6 18.8362  2.7950  12 
   1   3   6 22.2887  1.9515   5 
   2   3   6 352.385  21.551   5 
  -3  -3  -6 541.539  32.795  13 
  -3  -3  -6 518.210  35.233   2 
   3   3   6 555.401  32.631   5 
  -4  -3  -6 219.215  26.879   1 
  -4  -3  -6 248.736  15.215  13 
  -4  -3  -6 228.430  20.764  15 
  -4  -3  -6 230.456  12.999  14 
  -4  -3  -6 231.289  15.869   2 
  -5  -3  -6 30.4835  3.1780   2 
  -5  -3  -6 38.9344  5.3134  15 
  -5  -3  -6 35.4164  7.7437   1 
  -6  -3  -6 31.9832  2.9765   2 
  -6  -3  -6 30.4435  6.6836   1 
  -6  -3  -6 31.7464  4.2278  15 
  -7  -3  -6 1.45828 0.74806   2 
  -7  -3  -6 0.99299 2.16391   1 
  -7  -3  -6 1.46520 1.08492  15 
  -7   4   6 14.3982  1.4357   6 
  -7   4   6 12.4616  1.2042   7 
  -6   4   6 5.33802 0.93285   4 
  -6   4   6 5.56846 1.25122   6 
  -6   4   6 7.92433 1.49414   8 
  -6   4   6 7.60689 1.12582   7 
  -5   4   6 30.0519  3.1701   6 
  -5   4   6 29.7998  3.0470   8 
  -5   4   6 23.6714  2.2731   7 
  -5   4   6 22.1247  2.0298   4 
  -4   4   6 105.042   6.686   7 
  -4   4   6 97.8260  6.0533   4 
  -4   4   6 92.4628  7.3930   6 
  -4   4   6 93.1944  6.9660   8 
  -3   4   6 209.128  14.692   6 
  -3   4   6 229.380  12.290   4 
  -3   4   6 203.258  13.011  10 
  -3   4   6 219.339  13.376   7 
  -3   4   6 203.067  13.633   8 
  -2   4   6 43.2151  3.6373   8 
  -1   4   6 53.2773  5.5979  12 
   0   4   6 34.4002  3.9607  12 
  -1  -4  -6 46.8312  4.1640  13 
   1   4   6 55.8673  3.8936   5 
  -2  -4  -6 61.0700  5.1891  13 
   2   4   6 70.7316  4.8446   5 
  -3  -4  -6 81.8812  6.2212   2 
  -3  -4  -6 86.8307  6.3752  13 
  -3  -4  -6 79.2678 11.6245   1 
  -3  -4  -6 76.6374  5.5513  14 
  -4  -4  -6 4.74806 2.17708  15 
  -4  -4  -6 4.41589 3.87596   1 
  -4  -4  -6 6.68140 1.84883  13 
  -4  -4  -6 7.24301 1.33681  14 
  -4  -4  -6 6.59640 1.45538   2 
  -5  -4  -6 7.29213 1.46028   2 
  -5  -4  -6 3.78945 3.68381   1 
  -5  -4  -6 5.18909 2.07752  15 
  -6  -4  -6 17.2000  2.8617  15 
  -6  -4  -6 16.7364  1.9370   2 
  -6  -4  -6 9.23273 3.84603   1 
  -6   5   6 3.32903 0.71194   4 
  -6   5   6 1.68004 0.63129   7 
  -6   5   6 2.36198 0.95613   8 
  -6   5   6 1.86480 0.81352   6 
  -5   5   6 9.36056 1.68108   8 
  -5   5   6 7.78355 1.50250   6 
  -5   5   6 8.68608 1.25929   7 
  -5   5   6 5.85852 1.02413   4 
  -4   5   6 131.571   7.879   4 
  -4   5   6 129.567   8.971   8 
  -4   5   6 137.636   8.600   7 
  -4   5   6 125.570   9.534   6 
  -3   5   6 383.100  20.419   4 
  -3   5   6 363.756  22.209   7 
  -3   5   6 354.010  21.803  10 
  -3   5   6 354.401  22.517   8 
  -2   5   6 287.291  18.631   8 
  -2   5   6 304.516  16.862   4 
  -2   5   6 303.035  18.460  10 
  -1   5   6 4.57772 1.49488  10 
  -1   5   6 5.84542 1.40140   8 
   0  -5  -6 0.55058 0.97724  13 
  -1  -5  -6 7.35345 1.68406  13 
  -2  -5  -6 154.152  10.947   2 
  -2  -5  -6 161.493  10.673  13 
  -3  -5  -6 421.793  24.390  13 
  -3  -5  -6 366.339  25.771   2 
  -3  -5  -6 374.860  42.472   1 
  -3  -5  -6 401.235  21.614  14 
  -4  -5  -6 111.428  16.756   1 
  -4  -5  -6 142.974   8.063  14 
  -4  -5  -6 145.875   9.797   2 
  -4  -5  -6 137.623   9.469  13 
  -5  -5  -6 47.7818  3.8089   2 
  -5  -5  -6 40.3225  4.9899  15 
  -5  -5  -6 44.2278  7.9322   1 
  -6  -5  -6 3.61944 2.62928   1 
  -6  -5  -6 7.62415 1.19278   2 
  -6  -5  -6 9.46235 1.81555  15 
  -6   6   6 29.6994  2.4438   8 
  -6   6   6 30.6085  2.0576   4 
  -6   6   6 28.4590  2.4860   6 
  -6   6   6 31.0180  2.2217   7 
  -5   6   6 56.1969  4.3540   6 
  -5   6   6 54.3981  4.1864   8 
  -5   6   6 52.9281  3.5197   4 
  -5   6   6 52.6892  3.7805   7 
  -4   6   6 35.6800  2.8138   7 
  -4   6   6 34.7335  3.2368   8 
  -4   6   6 40.2813  3.4349   6 
  -4   6   6 32.5715  2.6179   4 
  -3   6   6 31.9642  2.4219   4 
  -3   6   6 24.9313  2.9834   8 
  -2   6   6 148.523   9.162   4 
  -2   6   6 157.607  10.419   8 
  -2   6   6 162.560  10.149  10 
  -1   6   6 66.9364  5.1597   8 
  -1   6   6 73.1770  5.3094  10 
  -1   6   6 65.3605  4.4320   4 
   0  -6  -6 62.6536  4.9129  13 
  -1  -6  -6 62.2091  4.9509  13 
  -2  -6  -6 212.801  14.308   2 
  -2  -6  -6 206.092  13.673  13 
  -3  -6  -6 7.74056 1.44950   2 
  -3  -6  -6 5.18502 3.64401   1 
  -3  -6  -6 5.11791 1.66633  13 
  -3  -6  -6 6.69689 1.51071  14 
  -4  -6  -6 20.1778  2.3072   2 
  -4  -6  -6 20.1348  1.9698  14 
  -4  -6  -6 16.9634  4.9915   1 
  -5  -6  -6 9.49762 3.63731   1 
  -5  -6  -6 15.2827  1.7646   2 
  -5   7   6 26.3659  2.2173   6 
  -5   7   6 22.6839  1.7530   4 
  -5   7   6 23.3906  1.8317   7 
  -5   7   6 19.9527  2.1970   8 
  -4   7   6 18.6804  1.6023   4 
  -4   7   6 13.8324  2.0087   8 
  -4   7   6 17.3533  2.0893   6 
  -3   7   6 216.531  13.495   8 
  -3   7   6 203.674  11.982   4 
  -2   7   6 30.3135  2.4610   4 
  -2   7   6 35.2221  3.1562   8 
  -2   7   6 30.5459  2.7637  10 
   1  -7  -6 73.4028  5.2922  13 
   1  -7  -6 65.0248  4.5000   4 
  -1   7   6 65.5766  5.1320   8 
  -1   7   6 65.9678  5.1139  10 
   0  -7  -6 106.957   7.541  13 
  -1  -7  -6 74.8433  5.6634  13 
  -2  -7  -6 54.5734  4.5189  13 
  -3  -7  -6 142.521  18.098   1 
  -3  -7  -6 154.952  10.632   2 
  -3  -7  -6 160.601  10.263  13 
  -3  -7  -6 156.243   9.084  14 
  -4  -7  -6 14.3095  4.1449   1 
  -4  -7  -6 18.6752  1.9229   2 
  -5  -7  -6 58.3412  8.8543   1 
  -5  -7  -6 83.2585  5.2682   2 
   4  -8  -6 7.55322 1.06058   4 
   4  -8  -6 6.93890 1.24919  13 
  -4   8   6 7.06621 0.94284   4 
  -4   8   6 6.88237 1.28804   8 
   3  -8  -6 39.5264  3.2442  13 
   3  -8  -6 37.9926  2.7715   4 
  -3   8   6 33.1471  2.6044   4 
  -3   8   6 41.3356  3.2986   8 
   2  -8  -6 47.1224  4.0165  13 
   2  -8  -6 46.1700  3.4933   4 
  -2   8   6 52.9300  4.1212   8 
  -2   8   6 56.0905  3.7441  10 
   1  -8  -6 60.1704  4.7360  13 
  -1   8   6 64.0467  4.6881  10 
  -1   8   6 61.0987  4.7198   8 
   0  -8  -6 65.9276  5.0483  13 
   0   8   6 68.0151  5.1445  10 
  -1  -8  -6 48.4241  4.0144  13 
  -2  -8  -6 2.98809 1.23363  14 
  -2  -8  -6 4.24374 1.27615  13 
  -3  -8  -6 104.608  13.062   1 
  -3  -8  -6 112.999   6.489  14 
  -4  -8  -6 33.5037  5.1672   1 
   3  -9  -6 41.5869  2.8029   4 
   3  -9  -6 44.2843  3.2379  13 
  -3   9   6 41.4430  3.2505   8 
   2  -9  -6 114.181   7.453  13 
  -2   9   6 110.189   7.413   8 
   1  -9  -6 15.0338  1.9828  13 
  -1   9   6 16.7321  1.9781   8 
  -1   9   6 20.8317  2.0458  10 
   0  -9  -6 14.0333  1.9514  13 
   0   9   6 16.9251  2.0431  10 
  -1  -9  -6 17.7853  2.1358  13 
  -2  -9  -6 98.7573  6.7512  13 
  -2  -9  -6 107.979   6.227  14 
  -3  -9  -6 6.64222 0.85573  14 
   0  10   6 150.313   9.399  10 
   2  14  -7 24.3878  1.8262   8 
  -2 -14   7 18.2178  3.0705  15 
   1  14  -7 24.7156  2.0027   8 
   1  14  -7 23.1483  2.2468   6 
  -1 -14   7 24.9512  3.6093  15 
   0  14  -7 164.823  11.399   6 
   0  14  -7 153.124  10.457  10 
   0 -14   7 157.146  18.146   1 
   0 -14   7 194.558  15.038  15 
  -1  14  -7 16.4698  1.7935  10 
  -1  14  -7 14.7125  2.0035   6 
   1 -14   7 25.9382  3.7413   1 
  -2  14  -7 21.4776  2.0833   6 
   2 -14   7 15.3709  3.1221   1 
  -3  14  -7 14.3648  1.6595   6 
  -4 -13   7 2.22206 1.29196  15 
   3  13  -7 20.1368  1.6617   8 
  -3 -13   7 16.4178  3.1363  15 
   2  13  -7 0.89513 0.76987   6 
   2  13  -7 0.04786 0.52502   8 
  -2 -13   7 -0.5573  1.2906  15 
   1  13  -7 42.6523  3.7381   6 
   1  13  -7 43.0851  3.2544   8 
  -1 -13   7 46.9745  5.4638  15 
   0  13  -7 56.2909  4.7778   6 
   0 -13   7 75.8219  6.8970  15 
   0 -13   7 48.1537  7.5721   1 
  -1  13  -7 24.1441  2.5199  10 
  -1  13  -7 22.4779  2.7401   6 
  -2  13  -7 1.58123 0.80838  10 
  -2  13  -7 2.42511 1.13953   6 
   2 -13   7 1.24892 1.88782   1 
  -3  13  -7 31.2656  2.9352   6 
   3 -13   7 27.9773  4.6495   1 
  -4  13  -7 3.55347 0.97384   6 
   4 -13   7 1.88571 1.52072   1 
  -4 -12   7 12.4094  2.6699  15 
   3  12  -7 31.1683  2.6905   6 
  -3 -12   7 24.6441  4.3799  15 
   2  12  -7 17.3038  2.0472   6 
  -2 -12   7 11.0933  2.9286  15 
   1  12  -7 186.569  11.816   8 
   1  12  -7 180.631  13.114   6 
  -1 -12   7 205.401  17.640  15 
   0  12  -7 220.309  16.370   6 
   0 -12   7 260.403  21.520  15 
  -1  12  -7 194.106  14.110  10 
  -1  12  -7 204.768  15.480   6 
   1 -12   7 243.897  20.066  15 
   1 -12   7 252.867  24.786   1 
  -2  12  -7 6.79362 1.72893   6 
  -2  12  -7 7.50320 1.44086  10 
   2 -12   7 8.50792 2.95199   1 
  -3  12  -7 12.5071  2.0418   6 
   3 -12   7 10.8096  3.1444   1 
  -4  12  -7 35.4136  3.0824   6 
   4 -12   7 26.3625  5.1258   1 
  -5 -11   7 15.6485  2.9577  15 
  -5 -11   7 15.5335  1.8576   2 
  -4 -11   7 27.5628  2.7563   2 
  -4 -11   7 21.7371  4.1065  15 
   3  11  -7 97.0340  6.7876   6 
  -3 -11   7 86.6421  9.7732  15 
   2  11  -7 3.31739 1.03257   6 
  -2 -11   7 2.28087 1.93565  15 
   1  11  -7 76.3163  5.5815   6 
  -1 -11   7 60.3259  7.4993  15 
   0  11  -7 550.433  40.111   6 
   0 -11   7 680.677  51.971  15 
  -1  11  -7 23.3541  3.0811   6 
  -1  11  -7 25.4127  2.9303  10 
  -2  11  -7 33.2559  3.5971   6 
  -2  11  -7 27.9392  2.9572  10 
   2 -11   7 22.3435  4.9867   1 
   2 -11   7 19.2188  3.8308  15 
  -3  11  -7 138.748   9.448   6 
  -3  11  -7 108.756  13.899   1 
  -3  11  -7 139.462   8.054  10 
   3 -11   7 108.237  14.596   1 
  -4  11  -7 3.30143 1.13107   7 
  -4  11  -7 3.36897 1.68805   1 
  -4  11  -7 4.38065 1.37903   6 
   4 -11   7 0.86870 2.09252   1 
  -5  11  -7 80.3252  5.5773   7 
  -6 -10   7 4.56384 0.97616   2 
  -5 -10   7 34.7880  5.1128  15 
  -5 -10   7 33.8310  3.2616   2 
   4  10  -7 1.57424 0.80187   6 
  -4 -10   7 0.17451 1.15584   2 
  -4 -10   7 0.75670 2.08769  15 
   3  10  -7 1.28135 0.77380   6 
  -3 -10   7 1.07243 1.84247  15 
   2  10  -7 114.834   7.541   6 
  -2 -10   7 86.1180 10.3219  15 
   1  10  -7 253.178  16.320   6 
  -1 -10   7 223.711  21.422  15 
   0  10  -7 260.856  19.748   6 
   0 -10   7 334.547  26.038  15 
   1 -10   7 323.433  30.308  15 
   1 -10   7 380.701  37.663   1 
  -2  10  -7 154.651  17.445   1 
  -2  10  -7 152.061  10.385  10 
  -2  10  -7 165.047  11.524   6 
  -3  10  -7 98.6061 11.4543   1 
  -3  10  -7 96.6377  6.5917  10 
  -3  10  -7 104.671   7.696   6 
  -3  10  -7 86.5939  6.8639   7 
  -4  10  -7 9.58476 1.74108   7 
  -4  10  -7 5.77685 2.11904   1 
  -5  10  -7 40.2043  3.3525   7 
  -5  10  -7 40.1425  5.2047   1 
  -5  10  -7 32.2895  2.5743   4 
  -6  10  -7 3.87931 0.70204   4 
  -6  10  -7 2.88139 0.90559   7 
  -6  10  -7 4.01278 1.50772   1 
  -6  -9   7 15.5113  2.0171   2 
  -5  -9   7 103.155   8.062   2 
  -5  -9   7 107.024  10.936  15 
  -5  -9   7 106.022   6.846   8 
  -4  -9   7 78.1548  8.7895  15 
  -4  -9   7 67.1724  6.2148   2 
  -4  -9   7 77.2534  5.1427   8 
  -3  -9   7 251.536  18.295   2 
  -3  -9   7 258.259  17.514   6 
  -3  -9   7 286.173  16.192   8 
  -3  -9   7 249.399  23.836  15 
  -2  -9   7 78.0932  9.1524  15 
  -2  -9   7 93.5947  5.9061   8 
   1   9  -7 59.1840  5.4084   3 
   0   9  -7 70.5096  6.3873   3 
  -2   9  -7 149.229  16.446   1 
  -2   9  -7 145.635   9.831  10 
  -3   9  -7 143.362  10.479   6 
  -3   9  -7 151.826   9.360  10 
  -3   9  -7 141.136   9.794   7 
  -3   9  -7 132.947  15.888   1 
  -4   9  -7 164.473  18.595   1 
  -4   9  -7 173.757  11.465   7 
  -5   9  -7 70.7807  8.6380   1 
  -5   9  -7 72.2605  5.4801   7 
  -5   9  -7 67.7854  4.5786   4 
  -6   9  -7 118.896   7.176   4 
  -6   9  -7 120.325   8.099   7 
  -6   9  -7 123.351  13.460   1 
  -6  -8   7 105.216   7.997   2 
  -6  -8   7 107.062   6.789   8 
  -5  -8   7 32.3130  2.6567   8 
  -5  -8   7 32.2385  2.7402   6 
  -5  -8   7 33.9806  3.9138   2 
  -4  -8   7 53.4786  5.3013   2 
  -4  -8   7 57.5958  4.4752   6 
  -4  -8   7 60.9417  7.5030  15 
  -4  -8   7 60.5122  4.2497   8 
  -3  -8   7 137.603  10.090   6 
  -3  -8   7 146.312  11.014   2 
  -3  -8   7 144.028  14.404  15 
  -3  -8   7 160.207   9.432   8 
   2   8  -7 156.071  11.679   3 
  -2  -8   7 138.713  10.023   5 
   1   8  -7 22.5099  2.6543   3 
  -1   8  -7 39.6516  4.0857   3 
   1  -8   7 36.8559  3.8258   9 
  -2   8  -7 249.542  18.061   3 
   2  -8   7 210.257  18.205   9 
  -3   8  -7 243.080  24.640   1 
  -3   8  -7 228.203  14.870   7 
  -3   8  -7 233.394  14.268  10 
  -3   8  -7 207.586  19.704  15 
  -4   8  -7 64.8109  7.7720   1 
  -4   8  -7 57.9491  4.9362   7 
  -4   8  -7 53.3924  4.1002   4 
  -4   8  -7 55.9057  5.9494  15 
  -5   8  -7 139.013   8.572   4 
  -5   8  -7 144.509  15.806   1 
  -5   8  -7 133.367   9.605   7 
  -6   8  -7 46.3034  3.2747   4 
  -6   8  -7 45.2449  3.7320   7 
  -6   8  -7 41.7517  5.9531   1 
  -7   8  -7 7.08982 1.82000   1 
  -7   8  -7 5.99853 1.04463   7 
  -7   8  -7 7.78043 0.98487   4 
  -7  -7   7 8.18246 0.94392   8 
  -7  -7   7 7.02484 1.41443   2 
  -6  -7   7 29.3759  2.4479   8 
  -6  -7   7 34.6398  3.8122   2 
  -5  -7   7 45.7395  3.6172   8 
  -5  -7   7 43.4358  4.6613   2 
  -5  -7   7 52.3694  3.8504   6 
  -4  -7   7 75.4601  6.9561   2 
  -4  -7   7 91.0030  6.1756   6 
  -4  -7   7 81.4787  5.7444   8 
  -3  -7   7 59.3473  4.1020   8 
  -3  -7   7 51.1379  4.6547   5 
   2   7  -7 299.545  21.114   3 
  -2  -7   7 259.749  17.760   5 
   1   7  -7 702.678  54.565   3 
  -1  -7   7 796.113  45.137   5 
   0   7  -7 840.394  61.444   3 
  -1   7  -7 678.271  51.818   3 
   1  -7   7 729.052  54.349   9 
  -2   7  -7 224.459  16.010   3 
   2  -7   7 183.730  16.139   9 
  -3   7  -7 33.9637  3.9424   3 
  -4   7  -7 49.4250  4.1399   4 
  -4   7  -7 64.0231  5.0117   7 
  -4   7  -7 57.0066  7.6678   1 
  -4   7  -7 60.7668  6.0105  15 
  -5   7  -7 129.821  12.273  15 
  -5   7  -7 157.260  15.908   1 
  -5   7  -7 133.873   8.529   4 
  -5   7  -7 124.917   9.391   7 
  -6   7  -7 11.8628  3.1346   1 
  -6   7  -7 15.0192  1.8944   4 
  -6   7  -7 10.0939  1.8366   7 
  -7   7  -7 56.2775  6.8392   1 
  -7   7  -7 53.4286  3.6372   4 
  -7   7  -7 56.2812  4.0071   7 
  -7  -6   7 58.8951  3.9753   8 
  -7  -6   7 61.2832  4.8942   2 
  -6  -6   7 30.6941  2.5061   8 
  -6  -6   7 36.0099  3.9967   2 
  -6  -6   7 26.3919  2.4741   6 
  -5  -6   7 156.481  10.447   8 
  -5  -6   7 169.766  11.242   6 
  -5  -6   7 164.419  12.324   2 
  -4  -6   7 14.0405  2.7509   2 
  -4  -6   7 24.4409  2.3921   8 
  -4  -6   7 20.0993  2.0957   6 
   3   6  -7 119.500   8.941   3 
  -3  -6   7 104.304   7.996   5 
   2   6  -7 265.236  19.417   3 
  -2  -6   7 253.247  16.451   5 
   1   6  -7 164.160  12.854   3 
  -1  -6   7 173.027  10.878   5 
   0   6  -7 103.140   8.309   3 
   0  -6   7 101.943   6.852   5 
  -1   6  -7 171.661  14.108   3 
   1  -6   7 190.986  14.572   9 
  -2   6  -7 427.323  30.203   3 
   2  -6   7 380.588  31.358   9 
  -3   6  -7 287.018  21.563   3 
   3  -6   7 273.046  22.250   9 
  -4   6  -7 51.1126  4.4340   7 
  -4   6  -7 59.1470  7.4584   1 
  -4   6  -7 49.7171  4.0041   4 
  -4   6  -7 49.5866  5.4729  15 
  -5   6  -7 189.279  20.983   1 
  -5   6  -7 201.730  11.537   4 
  -5   6  -7 175.543  12.447   7 
  -5   6  -7 184.787  16.536  15 
  -6   6  -7 109.895  13.828   1 
  -6   6  -7 109.173   8.133   7 
  -6   6  -7 130.183   7.663   4 
  -6   6  -7 124.717  10.889  15 
  -7   6  -7 87.3100 11.4609   1 
  -7   6  -7 116.298   6.292   4 
  -7  -5   7 66.2753  5.4194   2 
  -7  -5   7 68.4375  4.5296   8 
  -6  -5   7 136.090   8.821   6 
  -6  -5   7 119.122   8.185   8 
  -6  -5   7 121.154   9.751   2 
  -5  -5   7 120.124   8.369   6 
  -5  -5   7 113.725   9.386   2 
  -5  -5   7 117.070   7.848   8 
   4   5  -7 70.6843  5.9947   3 
  -4  -5   7 74.0414  5.2069   8 
  -4  -5   7 72.3178  5.8633   5 
  -4  -5   7 75.1123  6.4614   2 
   3   5  -7 149.995  11.294   3 
  -3  -5   7 142.853   9.978   5 
   2   5  -7 28.8110  2.6541   3 
  -2  -5   7 24.7473  2.7804   5 
   1   5  -7 350.022  25.339   3 
  -1  -5   7 334.895  21.058   5 
   0   5  -7 1026.76   74.57   3 
   0  -5   7 1027.82   61.23   5 
  -1   5  -7 256.246  22.774   3 
   1  -5   7 322.306  18.721   5 
   1  -5   7 337.952  23.918   9 
  -2   5  -7 143.086  11.199   3 
   2  -5   7 138.615  11.483   9 
  -3   5  -7 57.2121  5.1905   3 
   3  -5   7 50.5291  5.0155   9 
  -4   5  -7 86.0304 10.7769   1 
  -5   5  -7 0.69039 1.10591   4 
  -5   5  -7 0.67150 1.16895   7 
  -5   5  -7 2.31012 2.36428   1 
  -5   5  -7 0.78403 1.15256  15 
  -6   5  -7 85.1713  5.8706   4 
  -6   5  -7 84.3565 10.8968   1 
  -6   5  -7 88.9968  8.3610  15 
  -6   5  -7 85.5558  6.3148   7 
  -7   5  -7 3.61781 1.00505   4 
  -7   5  -7 5.85448 2.42566   1 
  -7   5  -7 5.05067 1.47964  15 
  -7  -4   7 23.9984  2.0836   8 
  -6  -4   7 11.5600  1.6077   6 
  -6  -4   7 10.8476  1.6429   8 
  -6  -4   7 12.3238  2.6002   2 
  -5  -4   7 218.202  16.011   2 
  -5  -4   7 221.431  14.939   6 
  -5  -4   7 220.320  13.916   8 
   4   4  -7 34.2044  3.3110   3 
  -4  -4   7 37.0248  3.9742   5 
  -4  -4   7 35.8567  3.0302   8 
   3   4  -7 79.6055  6.5037   3 
  -3  -4   7 83.6477  6.0885   5 
   2   4  -7 207.121  14.945   3 
  -2  -4   7 188.168  12.685   5 
   1   4  -7 396.677  30.039   3 
  -1  -4   7 424.595  24.997   5 
   0   4  -7 1021.76   75.95   3 
   0  -4   7 1075.61   62.45   5 
  -1   4  -7 505.388  37.246   3 
   1  -4   7 509.134  30.521   5 
  -2   4  -7 247.582  18.418   3 
   2  -4   7 249.575  19.248   9 
   2  -4   7 231.586  14.884   5 
   3  -4   7 44.4508  4.3919   9 
  -5   4  -7 374.104  31.839  15 
  -5   4  -7 365.504  21.495   4 
  -5   4  -7 405.831  40.344   1 
  -5   4  -7 351.712  23.324   7 
  -6   4  -7 63.2214  6.1563  15 
  -6   4  -7 43.9964  7.8418   1 
  -6   4  -7 63.5597  4.4529   4 
  -7   4  -7 104.469  12.333   1 
  -7   4  -7 96.9338  6.4206   4 
  -7   4  -7 108.401   9.557  15 
  -7  -3   7 58.4589  4.0576   8 
  -7  -3   7 55.4863  4.2160   6 
  -6  -3   7 128.424   8.722   6 
  -6  -3   7 115.904   8.116   8 
  -5  -3   7 139.416   9.293   6 
  -5  -3   7 127.905  10.240   2 
  -5  -3   7 120.240   8.611   8 
   4   3  -7 2.76783 0.96026   3 
  -4  -3   7 5.25463 1.23389   8 
  -4  -3   7 6.82313 1.78354   5 
   3   3  -7 90.5252  7.3575   3 
  -3  -3   7 96.4140  6.7890   5 
   2   3  -7 184.178  13.689   3 
  -2  -3   7 178.092  11.700   5 
   1   3  -7 67.2155  5.5352   3 
  -1  -3   7 71.1502  4.8782   5 
   0   3  -7 9.82321 1.42139   3 
   0  -3   7 11.3276  1.4266   5 
  -1   3  -7 84.2150  6.8976   3 
   1  -3   7 88.4915  5.7242   5 
  -2   3  -7 128.739   9.402   3 
   2  -3   7 113.794   9.742   9 
   2  -3   7 112.568   7.534   5 
   3  -3   7 131.965  11.089   9 
  -5   3  -7 2.95903 2.87310   1 
  -5   3  -7 0.40086 1.22783  15 
  -5   3  -7 2.30313 1.27236   4 
  -6   3  -7 74.7445  7.0980  15 
  -6   3  -7 57.2410  9.2243   1 
  -6   3  -7 65.8529  4.8604   4 
  -7   3  -7 -0.4870  1.0221  15 
  -7   3  -7 0.01851 0.79123   4 
  -7   3  -7 0.09914 1.94954   1 
  -7  -2   7 14.5109  1.7001   8 
  -7  -2   7 13.0424  1.6104   6 
  -6  -2   7 1.41186 1.00862   8 
  -6  -2   7 0.26669 0.74567   6 
  -5  -2   7 53.1379  4.2597   8 
  -5  -2   7 53.7036  4.4081   6 
   4   2  -7 2.66497 0.96808   3 
  -4  -2   7 2.15980 1.45016   5 
  -4  -2   7 1.89318 0.98553   8 
   3   2  -7 19.8558  2.2068   3 
  -3  -2   7 22.6046  2.7252   5 
   2   2  -7 160.082  12.268   3 
  -2  -2   7 163.352  10.564   5 
   1   2  -7 827.389  58.862   3 
  -1  -2   7 793.741  48.565   5 
   0   2  -7 11.4093  1.5048   3 
   0  -2   7 11.7420  1.4429   5 
  -1   2  -7 715.370  50.880   3 
   1  -2   7 683.602  41.810   5 
   2  -2   7 294.081  23.971   9 
   2  -2   7 315.484  18.615   5 
   3  -2   7 70.3544  6.5695   9 
   3  -2   7 73.8358  4.9353   5 
  -5   2  -7 21.9443  2.6871   4 
  -5   2  -7 19.1782  3.3129  15 
  -5   2  -7 15.2373  4.9327   1 
  -6   2  -7 102.534   6.655   4 
  -6   2  -7 84.6448 12.7354   1 
  -6   2  -7 108.876   9.868  15 
  -7   2  -7 52.9133  3.8909   4 
  -7   2  -7 61.0420  5.9664  15 
  -7  -1   7 27.8184  2.5482   8 
  -7  -1   7 32.7084  2.6720   6 
  -6  -1   7 278.971  17.178   8 
  -6  -1   7 270.622  18.459   6 
  -5  -1   7 0.89108 0.94344   6 
  -5  -1   7 -0.4350  0.6025   7 
  -5  -1   7 0.33270 0.85962   8 
   4   1  -7 34.0578  3.3941   3 
  -4  -1   7 35.8302  3.1895   8 
   3   1  -7 182.658  14.213   3 
  -3  -1   7 192.952  12.346   5 
   2   1  -7 280.616  20.882   3 
  -2  -1   7 281.008  17.580   5 
   1   1  -7 217.000  15.991   3 
  -1  -1   7 209.963  13.408   5 
   0   1  -7 0.87301 0.54736   3 
   0  -1   7 1.32886 0.64133   5 
   1  -1   7 221.162  13.673   5 
  -2   1  -7 231.122  18.943   9 
   2  -1   7 237.818  14.495   5 
  -3   1  -7 230.264  18.503   9 
   3  -1   7 217.558  13.850   5 
   4  -1   7 62.7646  4.5065   5 
  -5   1  -7 5.60359 3.68899   1 
  -5   1  -7 7.20603 2.30369  15 
  -5   1  -7 8.51653 1.79146   4 
  -6   1  -7 228.991  19.032  15 
  -6   1  -7 216.451  12.586   4 
  -6   1  -7 183.091  24.072   1 
  -7   1  -7 -0.0970  2.0660   1 
  -7   1  -7 -0.0764  1.0767  15 
  -7   0   7 7.34987 1.22935   6 
  -7   0   7 9.82893 1.43627   8 
  -6   0   7 90.0498  6.5886   6 
  -6   0   7 85.9118  5.8296   7 
  -6   0   7 84.2549  6.1987   8 
  -5   0   7 3.75199 0.96443   7 
  -5   0   7 3.46422 1.19285   6 
  -5   0   7 4.70366 1.30628   8 
  -4   0   7 101.108   7.109   8 
   3   0  -7 161.929  12.483   3 
   2   0  -7 35.6885  3.2376   3 
  -2   0   7 31.9692  3.0114   5 
   1   0  -7 139.158  10.620   3 
  -1   0   7 138.314   9.008   5 
   0   0   7 1185.74  100.51  12 
   0   0   7 1395.63   76.72   5 
   1   0   7 142.580   9.077   5 
   2   0   7 19.9308  1.8579   5 
  -3   0  -7 185.666  16.080   9 
   3   0   7 194.096  12.027   5 
  -4   0  -7 188.170  12.689   2 
  -4   0  -7 171.580  21.423   1 
   4   0   7 186.919  11.722   5 
  -5   0  -7 10.1948  1.7664   2 
  -5   0  -7 9.73299 4.45437   1 
  -5   0  -7 7.17105 2.35053  15 
  -6   0  -7 29.4682  4.5561  15 
  -6   0  -7 31.8181  6.9520   1 
  -7   0  -7 8.43030 1.97168  15 
  -7   0  -7 5.14728 2.82450   1 
  -7   1   7 4.79162 0.99911   6 
  -7   1   7 5.67162 0.86723   7 
  -7   1   7 7.11013 1.19108   8 
  -6   1   7 19.1254  2.3952   8 
  -6   1   7 20.5842  2.4332   6 
  -6   1   7 20.5021  1.9466   7 
  -5   1   7 90.7377  7.0767   6 
  -5   1   7 97.1741  6.7907   8 
  -5   1   7 93.0412  6.3513   7 
  -4   1   7 56.2151  4.5335   8 
  -4   1   7 64.2677  3.8261   4 
  -4   1   7 48.8693  4.5487   6 
  -4   1   7 54.1447  4.1020   7 
   3  -1  -7 80.7492  6.7254   3 
   2  -1  -7 157.157  12.050   3 
  -2   1   7 155.920  10.273   5 
  -1   1   7 124.957  11.337  12 
  -1   1   7 137.308   8.619   5 
   0   1   7 63.0245  6.1252  12 
   0   1   7 68.7660  4.6335   5 
   1   1   7 133.966   8.620   5 
   2   1   7 76.0921  5.2680   5 
  -3  -1  -7 202.837  16.975   9 
  -3  -1  -7 196.170  12.946  13 
   3   1   7 196.366  12.546   5 
  -4  -1  -7 44.1731  3.7385   2 
  -4  -1  -7 38.6452  4.9954  15 
  -4  -1  -7 40.5681  8.2400   1 
  -4  -1  -7 40.2423  3.5893   4 
  -5  -1  -7 161.856  21.290   1 
  -5  -1  -7 186.983  16.394  15 
  -5  -1  -7 178.254  12.379   2 
  -6  -1  -7 7.44587 4.16393   1 
  -6  -1  -7 18.1115  2.2025   2 
  -6  -1  -7 21.9794  3.5420  15 
  -7  -1  -7 0.88487 2.06392   1 
  -7  -1  -7 0.53911 1.01052  15 
  -7   2   7 18.7017  1.8236   8 
  -7   2   7 16.5704  1.6628   6 
  -7   2   7 15.8666  1.4335   7 
  -6   2   7 13.2105  1.9217   6 
  -6   2   7 16.2445  2.0771   8 
  -6   2   7 18.7081  1.7311   7 
  -5   2   7 28.6524  2.2858   4 
  -5   2   7 27.7796  2.5170   7 
  -5   2   7 27.1581  3.1378   8 
  -5   2   7 30.1165  2.9910   6 
  -4   2   7 127.046   9.193   6 
  -4   2   7 124.053   8.662   8 
  -4   2   7 122.237   7.531   4 
  -4   2   7 131.005   8.334   7 
   3  -2  -7 162.571  12.198   3 
  -3   2   7 147.449  10.236   8 
   2  -2  -7 165.375  12.711   3 
  -1   2   7 129.057  11.545  12 
  -1   2   7 133.553   8.636   5 
   0   2   7 18.0801  2.9098  12 
   0   2   7 23.3000  2.0385   5 
   1   2   7 121.248   7.936   5 
   2   2   7 201.930  12.762   5 
  -3  -2  -7 109.755   7.901  13 
  -3  -2  -7 110.028   6.952  14 
  -3  -2  -7 107.368   7.959   2 
   3   2   7 110.354   7.397   5 
  -4  -2  -7 18.9385  5.8804   1 
  -4  -2  -7 22.7034  2.6760   2 
  -4  -2  -7 22.3191  3.8323  15 
  -5  -2  -7 35.9824  4.8721  15 
  -5  -2  -7 41.5111  3.6074   2 
  -5  -2  -7 35.5869  8.0212   1 
  -6  -2  -7 10.1648  4.3203   1 
  -6  -2  -7 22.8743  2.2338   2 
  -6  -2  -7 16.7579  3.0751  15 
  -7  -2  -7 43.4236  6.5561   1 
  -7  -2  -7 53.5824  4.9661  15 
  -7   3   7 44.8548  3.5199   6 
  -7   3   7 50.6212  3.2199   7 
  -6   3   7 35.4981  2.3372   4 
  -6   3   7 29.7892  2.5171   7 
  -6   3   7 28.6627  2.8387   6 
  -6   3   7 35.4697  2.9267   8 
  -5   3   7 83.3718  5.8699   7 
  -5   3   7 83.8693  6.5428   6 
  -5   3   7 90.0470  5.3865   4 
  -4   3   7 155.604  10.720   8 
  -4   3   7 163.866  10.398   7 
  -4   3   7 161.492   9.488   4 
  -4   3   7 163.912  11.480   6 
  -3   3   7 117.327   7.077   4 
  -3   3   7 119.600   7.711   7 
  -3   3   7 111.152   8.013   8 
  -2   3   7 9.81029 1.77689   8 
  -1   3   7 2.34325 1.40448  12 
   0   3   7 304.341  17.680   5 
   0   3   7 264.887  23.382  12 
  -1  -3  -7 8.61432 1.83246  13 
   1   3   7 13.5485  1.6810   5 
  -2  -3  -7 26.8712  2.6460   2 
  -2  -3  -7 29.6086  3.3504  13 
   2   3   7 22.9766  2.3318   5 
  -3  -3  -7 50.1137  4.4629  13 
  -3  -3  -7 44.1682  8.6265   1 
  -3  -3  -7 50.9123  3.9807  14 
  -3  -3  -7 50.7995  4.2466   2 
  -4  -3  -7 202.284  18.752  15 
  -4  -3  -7 227.570  11.992  14 
  -4  -3  -7 210.647  14.505   2 
  -4  -3  -7 197.616  24.736   1 
  -5  -3  -7 16.9375  5.2214   1 
  -5  -3  -7 15.4587  2.1449   2 
  -5  -3  -7 19.6280  3.3582  15 
  -6  -3  -7 34.7862  2.7575   2 
  -6  -3  -7 29.3502  3.6429  15 
  -6  -3  -7 17.1635  5.1475   1 
  -6   4   7 8.17249 1.42827   8 
  -6   4   7 12.8639  1.3443   7 
  -6   4   7 11.0879  1.1715   4 
  -6   4   7 10.9778  1.5177   6 
  -5   4   7 1.73952 0.73351   4 
  -5   4   7 2.00227 0.74675   7 
  -5   4   7 1.86543 0.94306   6 
  -5   4   7 3.57253 1.16912   8 
  -4   4   7 42.8110  3.1281   4 
  -4   4   7 42.7660  3.3692   7 
  -4   4   7 42.5548  3.8205   8 
  -4   4   7 45.3044  3.9367   6 
  -3   4   7 1.62777 1.12557   8 
  -3   4   7 2.70540 0.88728   7 
  -3   4   7 1.80867 0.78666   4 
  -2   4   7 125.022   9.089   8 
  -2   4   7 138.968   8.996  10 
  -2   4   7 143.117   8.173   4 
   1  -4  -7 59.4411  4.3470  13 
  -1   4   7 42.6135  3.9713  10 
   0  -4  -7 595.766  35.933  13 
  -1  -4  -7 74.8642  5.6320   2 
  -1  -4  -7 71.4076  5.6451  13 
   1   4   7 79.4690  5.9031   2 
   1   4   7 69.8627  5.2297   5 
  -2  -4  -7 133.201   9.483   2 
  -2  -4  -7 133.381   9.286  13 
  -3  -4  -7 12.3862  2.3093  13 
  -3  -4  -7 17.9422  2.2455   2 
  -3  -4  -7 11.5477  2.0235  14 
  -3  -4  -7 14.3052  5.1091   1 
  -4  -4  -7 140.736  10.150   2 
  -4  -4  -7 155.766   8.465  14 
  -4  -4  -7 128.851  17.652   1 
  -5  -4  -7 2.30485 3.12957   1 
  -5  -4  -7 4.54370 1.74269  15 
  -5  -4  -7 2.67753 1.02590   2 
  -6  -4  -7 22.2902  2.0144   2 
  -6  -4  -7 14.4423  4.0245   1 
  -6  -4  -7 20.5485  2.6248  15 
  -6   5   7 21.3326  2.1062   8 
  -6   5   7 26.3731  2.2289   6 
  -6   5   7 25.8714  1.9487   7 
  -6   5   7 28.0417  1.8392   4 
  -5   5   7 86.2703  5.1317   4 
  -5   5   7 84.5381  5.5429   7 
  -5   5   7 86.4492  6.2011   6 
  -5   5   7 74.9353  5.8089   8 
  -4   5   7 66.6345  5.2988   8 
  -4   5   7 73.2068  4.9210   7 
  -4   5   7 67.6264  4.5344   4 
  -4   5   7 75.2962  5.5852   6 
  -3   5   7 131.203   9.360   8 
  -3   5   7 138.646   8.929   7 
  -3   5   7 146.340   8.352   4 
  -2   5   7 87.2212  5.3872   4 
  -2   5   7 85.6166  6.1989   8 
  -2   5   7 79.3283  5.8793  10 
   1  -5  -7 251.648  15.502  13 
   1  -5  -7 244.199  14.044   4 
  -1   5   7 230.406  15.308   8 
  -1   5   7 246.377  15.490  10 
   0  -5  -7 46.7152  4.0050  13 
   0  -5  -7 45.8409  3.4929   4 
  -1  -5  -7 158.537  10.656  13 
  -2  -5  -7 91.4610  7.0361  13 
  -2  -5  -7 98.1226  7.0837   2 
  -3  -5  -7 118.491  16.924   1 
  -3  -5  -7 151.331   8.672  14 
  -3  -5  -7 142.018   9.968   2 
  -3  -5  -7 149.824   9.821  13 
  -4  -5  -7 17.8019  1.8289  14 
  -4  -5  -7 14.1450  1.9639   2 
  -4  -5  -7 14.1812  4.6073   1 
  -5  -5  -7 130.711  16.202   1 
  -5  -5  -7 141.591   9.544   2 
  -5   6   7 26.0974  2.2526   6 
  -5   6   7 22.6094  1.8891   7 
  -5   6   7 26.1313  1.8686   4 
  -5   6   7 22.6149  2.2326   8 
  -4   6   7 16.3641  1.5891   7 
  -4   6   7 17.5499  2.1836   8 
  -4   6   7 16.7314  1.6946   4 
  -3   6   7 23.0446  2.6070   8 
  -3   6   7 18.9681  1.9402   4 
   2  -6  -7 116.907   8.219  13 
   2  -6  -7 115.908   7.379   4 
  -2   6   7 123.003   7.309   4 
  -2   6   7 123.913   7.953  10 
  -2   6   7 118.341   8.232   8 
   1  -6  -7 63.0375  4.4958   4 
   1  -6  -7 64.3004  5.0921  13 
  -1   6   7 65.5849  5.0830   8 
  -1   6   7 73.7469  5.1955  10 
   0  -6  -7 166.759  10.621  13 
   0  -6  -7 151.981   9.436   4 
  -1  -6  -7 52.1569  4.4303  13 
  -2  -6  -7 215.145  13.983  13 
  -3  -6  -7 30.8257  3.2861  13 
  -3  -6  -7 32.9863  2.9353   2 
  -3  -6  -7 32.1271  6.3478   1 
  -3  -6  -7 28.7732  2.8981  14 
  -4  -6  -7 1.85403 0.86566   2 
  -4  -6  -7 0.46791 2.57173   1 
  -5  -6  -7 52.1261  8.4076   1 
  -5  -6  -7 69.2793  4.9838   2 
   5   6   7 83.2125  5.2200   2 
   5  -7  -7 137.899   7.855   4 
   4  -7  -7 69.4400  4.8529  13 
   4  -7  -7 71.8684  4.4561   4 
  -4   7   7 70.7698  5.0042   8 
   3  -7  -7 20.3905  2.3606  13 
   3  -7  -7 23.0407  1.9974   4 
  -3   7   7 20.9189  2.4102   8 
   2  -7  -7 137.582   9.555  13 
   2  -7  -7 140.506   8.683   4 
  -2   7   7 158.474   9.305  10 
  -2   7   7 144.763   9.637   8 
   1  -7  -7 83.8991  6.1310  13 
   1  -7  -7 95.4082  5.5145   4 
  -1   7   7 73.9016  5.9341  10 
  -1   7   7 86.4477  6.0664   8 
   0  -7  -7 18.0739  2.3199  13 
   0   7   7 13.8669  2.1114  10 
  -1  -7  -7 96.0655  6.8788  13 
  -2  -7  -7 44.0306  3.5670  13 
  -2  -7  -7 32.9258  3.2382  14 
  -3  -7  -7 10.1376  1.7487  13 
  -3  -7  -7 12.7914  1.5738  14 
  -4  -7  -7 35.3526  6.2923   1 
   4   7   7 56.2414  3.7970   2 
   4  -8  -7 36.4066  2.4188   4 
   3  -8  -7 1.27293 0.81553  13 
   3  -8  -7 3.36101 0.79934   4 
  -3   8   7 3.02391 0.94410   8 
   2  -8  -7 36.2782  3.1615  13 
   2  -8  -7 41.7418  2.8339   4 
  -2   8   7 38.7594  3.1752   8 
   1  -8  -7 65.2539  4.5591  13 
  -1   8   7 56.3520  4.2985  10 
  -1   8   7 58.2283  4.3667   8 
   0  -8  -7 28.3063  2.6500  13 
   0   8   7 23.3618  2.5932  10 
  -1  -8  -7 84.5856  5.9955  13 
  -2  -8  -7 28.4487  2.5669  14 
  -2  -8  -7 28.1396  2.6028  13 
  -3  -8  -7 13.5668  1.3204  14 
   1  -9  -7 85.3600  5.7467  13 
  -1   9   7 85.0890  5.4187  10 
   0  -9  -7 181.573  10.933  13 
   0   9   7 165.845  10.797  10 
   1   9   7 50.4504  3.7510  10 
   2  14  -8 18.5879  1.7151   6 
  -2 -14   8 14.8069  2.6637  15 
   1  14  -8 13.3645  1.6591   6 
  -1 -14   8 15.8672  2.7168  15 
   0  14  -8 32.2950  3.0002   6 
   0  14  -8 32.1200  2.7837  10 
   0 -14   8 45.1285  4.4794  15 
  -1  14  -8 16.3197  1.7278  10 
  -1  14  -8 13.5189  1.8532   6 
   1 -14   8 23.8000  2.8848  15 
  -2  14  -8 29.4182  2.5727   6 
   2 -14   8 25.1453  4.0079   1 
  -4 -13   8 32.9072  3.7515  15 
   3  13  -8 29.8902  2.2097   8 
   3  13  -8 29.8187  2.4923   6 
  -3 -13   8 26.0719  3.9930  15 
   2  13  -8 25.4911  2.3781   6 
   2  13  -8 27.1548  2.0663   8 
  -2 -13   8 18.1669  3.5077  15 
   1  13  -8 54.7032  4.6246   6 
  -1 -13   8 64.4360  6.6618  15 
   0  13  -8 4.76161 1.24371   6 
   0 -13   8 7.89976 2.33822  15 
  -1  13  -8 85.3880  5.7186  10 
  -1  13  -8 82.0290  6.3039   6 
   1 -13   8 72.1458  9.7497   1 
   1 -13   8 82.3390  8.1667  15 
  -2  13  -8 45.9157  3.3681  10 
  -2  13  -8 47.2211  4.0306   6 
   2 -13   8 42.2864  6.2602   1 
  -3  13  -8 22.7708  2.2884   6 
   3 -13   8 17.5449  3.6597   1 
   4 -13   8 13.5869  2.7703   1 
  -4 -12   8 3.06595 1.67063  15 
   3  12  -8 2.60413 0.86826   6 
  -3 -12   8 1.13633 1.69160  15 
   2  12  -8 56.1498  4.1707   6 
  -2 -12   8 41.6490  5.8414  15 
   1  12  -8 137.389   9.624   6 
  -1 -12   8 129.811  12.890  15 
   0  12  -8 248.570  18.186   6 
   0 -12   8 289.920  23.852  15 
  -1  12  -8 109.925   8.430  10 
  -1  12  -8 109.530   9.231   6 
   1 -12   8 150.150  12.357  15 
   1 -12   8 142.177  14.925   1 
  -2  12  -8 44.2322  4.2155   6 
  -2  12  -8 43.4204  3.6641  10 
   2 -12   8 51.2191  6.8577   1 
   2 -12   8 45.2631  5.3589  15 
  -3  12  -8 26.0934  2.8262   6 
   3 -12   8 16.9596  4.0874   1 
  -4  12  -8 9.41082 1.25384   7 
   4 -12   8 5.63830 2.34834   1 
   5 -12   8 32.8307  4.6125   1 
  -5 -11   8 40.5167  3.3204   2 
   4  11  -8 54.0224  4.1611   6 
  -4 -11   8 55.5003  4.5503   2 
  -4 -11   8 55.6281  6.5138  15 
   3  11  -8 28.6832  2.5272   6 
  -3 -11   8 21.1134  4.3000  15 
   2  11  -8 62.3124  4.5373   6 
  -2 -11   8 45.4541  6.3795  15 
   1  11  -8 159.754  10.763   6 
  -1 -11   8 141.220  14.281  15 
   0  11  -8 32.2407  3.3813   6 
   0 -11   8 39.8780  4.9571  15 
  -1  11  -8 80.7041  6.5236   6 
  -1  11  -8 80.7509  5.9682  10 
  -2  11  -8 109.828   7.542  10 
  -2  11  -8 106.061   8.310   6 
   2 -11   8 104.442  13.151   1 
   2 -11   8 112.537  10.717  15 
  -3  11  -8 16.8881  2.2481   7 
  -3  11  -8 18.2591  3.5824   1 
  -3  11  -8 21.7199  1.9222  10 
  -3  11  -8 22.0130  2.7861   6 
   3 -11   8 23.5628  4.7457   1 
   3 -11   8 17.4176  3.3808  15 
  -4  11  -8 121.728   7.641   7 
  -4  11  -8 120.370  12.674   1 
   4 -11   8 90.2451 12.9905   1 
  -5  11  -8 18.0679  1.9555   7 
  -5 -10   8 4.75524 2.19687  15 
  -5 -10   8 6.76517 1.43575   2 
   4  10  -8 42.2352  3.4765   6 
  -4 -10   8 34.3404  5.6957  15 
  -4 -10   8 51.3222  4.2470   2 
   3  10  -8 217.267  13.978   6 
  -3 -10   8 199.584  19.122  15 
  -3 -10   8 195.205  14.498   2 
   2  10  -8 58.5926  4.1667   6 
  -2 -10   8 34.6278  6.0027  15 
   1  10  -8 78.6273  6.0246   6 
  -1 -10   8 79.2282  8.4649  15 
   0  10  -8 1387.46  105.09   6 
   0 -10   8 1903.11  135.30  15 
  -1  10  -8 120.915   9.312   6 
   1 -10   8 132.640  12.322  15 
  -2  10  -8 223.822  15.293   6 
  -2  10  -8 218.469  13.951  10 
  -2  10  -8 211.101  23.475   1 
  -3  10  -8 249.931  16.514   7 
  -3  10  -8 238.939  27.526   1 
  -3  10  -8 286.571  16.112  10 
  -4  10  -8 6.18553 1.49129   7 
  -4  10  -8 4.76124 1.97583   1 
  -5  10  -8 1.78640 1.37400   1 
  -5  10  -8 1.85273 1.00758   7 
  -6  10  -8 17.9166  2.6975   1 
  -6  10  -8 17.8070  1.6807   7 
  -6  10  -8 13.9855  1.2680   4 
  -6  -9   8 22.6144  2.3574   2 
  -5  -9   8 5.62901 1.58968   2 
  -5  -9   8 5.68746 0.95047   8 
  -4  -9   8 98.3781  7.8325   2 
  -4  -9   8 93.7369  6.9716   6 
  -4  -9   8 105.050   6.554   8 
  -4  -9   8 94.3305 10.3898  15 
  -3  -9   8 113.713   8.230   6 
  -3  -9   8 122.121   7.627   8 
  -3  -9   8 120.116   9.128   2 
  -3  -9   8 108.905  11.832  15 
  -2  -9   8 92.5378  5.7626   8 
  -2  -9   8 73.3534  8.9138  15 
   1   9  -8 197.125  13.069   6 
  -1  -9   8 180.642  17.315  15 
  -2   9  -8 4.02927 1.39533  10 
  -2   9  -8 4.74202 1.59365   7 
  -2   9  -8 6.36377 1.74098   6 
  -2   9  -8 7.17772 2.22477   1 
  -3   9  -8 414.697  42.981   1 
  -3   9  -8 390.271  25.610   7 
  -3   9  -8 425.346  25.019  10 
  -4   9  -8 69.8463  5.5448   7 
  -4   9  -8 68.4861  8.6247   1 
  -5   9  -8 44.8465  5.8078   1 
  -5   9  -8 42.8514  3.7360   7 
  -5   9  -8 37.6769  2.9987   4 
  -6   9  -8 12.0551  2.5541   1 
  -6   9  -8 12.9586  1.6700   7 
  -6   9  -8 10.8233  1.3221   4 
  -6  -8   8 3.07319 1.25497   2 
  -6  -8   8 3.88730 0.76909   8 
  -5  -8   8 69.4146  4.8037   8 
  -5  -8   8 70.7449  5.1082   6 
  -5  -8   8 65.9055  5.9080   2 
  -4  -8   8 26.6917  3.7016   2 
  -4  -8   8 32.2730  2.6403   8 
  -4  -8   8 30.6443  2.7372   6 
  -3  -8   8 274.547  17.671   6 
  -3  -8   8 257.830  16.220   8 
  -3  -8   8 255.992  18.487   2 
  -3  -8   8 268.056  23.988  15 
  -2  -8   8 598.136  34.285   8 
  -2  -8   8 566.296  35.250   5 
  -2  -8   8 555.815  38.076   2 
   1   8  -8 128.624  10.394   3 
   0   8  -8 99.2949  8.4327   3 
  -1   8  -8 73.4722  6.7019   3 
  -2   8  -8 704.202  42.347  10 
  -3   8  -8 130.638   8.493  10 
  -3   8  -8 125.211   9.031   7 
  -3   8  -8 124.798  11.800  15 
  -3   8  -8 131.642  14.645   1 
  -4   8  -8 77.0458  8.0008  15 
  -4   8  -8 86.7744  6.4880   7 
  -4   8  -8 84.0502 10.1645   1 
  -4   8  -8 85.5377  5.5419   4 
  -5   8  -8 102.213   6.443   4 
  -5   8  -8 88.2592  9.2167  15 
  -5   8  -8 115.093  11.972   1 
  -5   8  -8 97.0846  7.2526   7 
  -6   8  -8 8.47189 2.32170   1 
  -6   8  -8 8.56696 1.50772   7 
  -6   8  -8 8.23114 1.27898   4 
  -7   8  -8 66.1751  4.0165   4 
  -6  -7   8 29.0665  2.3194   8 
  -6  -7   8 30.5279  2.4080   6 
  -6  -7   8 21.9740  3.1129   2 
  -5  -7   8 46.9436  3.6057   8 
  -5  -7   8 50.1122  4.7722   2 
  -5  -7   8 46.6830  3.7611   6 
  -4  -7   8 71.6808  5.0564   8 
  -4  -7   8 69.4791  6.2613   2 
  -4  -7   8 71.0016  5.3426   6 
  -3  -7   8 219.983  16.123   2 
  -3  -7   8 206.613  14.827   5 
  -3  -7   8 233.443  14.139   8 
  -3  -7   8 243.087  15.335   6 
   2   7  -8 150.821  11.534   3 
  -2  -7   8 142.217   9.978   5 
   1   7  -8 369.179  29.863   3 
  -1  -7   8 441.330  24.957   5 
   0   7  -8 1412.15  102.60   3 
  -1   7  -8 496.187  36.980   3 
  -2   7  -8 434.832  31.282   3 
   2  -7   8 395.774  32.371   9 
  -3   7  -8 141.718  13.189  15 
  -3   7  -8 148.292   9.471  10 
  -3   7  -8 143.614  10.035   7 
  -3   7  -8 149.071  16.462   1 
  -4   7  -8 31.8164  3.9958  15 
  -4   7  -8 31.9388  5.1996   1 
  -4   7  -8 33.5700  3.1842   4 
  -4   7  -8 34.8085  3.7533   7 
  -5   7  -8 17.8116  2.8828  15 
  -5   7  -8 15.4789  2.0996   4 
  -5   7  -8 14.2724  3.5181   1 
  -5   7  -8 16.2609  2.3865   7 
  -6   7  -8 48.0770  3.8876   7 
  -6   7  -8 49.2155  3.5492   4 
  -6   7  -8 39.0635  6.1975   1 
  -6   7  -8 51.4644  5.0057  15 
  -7   7  -8 64.5322  3.9664   4 
  -7   7  -8 62.9626  4.2957   7 
  -7   7  -8 60.4655  7.3792   1 
  -7  -6   8 76.7407  5.9490   2 
  -7  -6   8 82.0295  5.1194   8 
  -6  -6   8 28.3333  2.4286   8 
  -6  -6   8 37.7968  4.0022   2 
  -6  -6   8 26.7785  2.4517   6 
  -5  -6   8 31.5491  2.9022   6 
  -5  -6   8 32.6727  4.1335   2 
  -5  -6   8 35.4915  2.8975   8 
  -4  -6   8 74.0150  5.7830   6 
  -4  -6   8 82.9616  5.5674   8 
   3   6  -8 41.7265  3.9270   3 
  -3  -6   8 41.3437  3.9045   5 
  -3  -6   8 45.9095  3.4276   8 
   2   6  -8 75.2788  5.8346   3 
  -2  -6   8 59.1118  5.1397   5 
   1   6  -8 377.877  26.484   3 
  -1  -6   8 330.707  21.915   5 
   0   6  -8 65.7202  5.6574   3 
   0  -6   8 62.5397  4.6908   5 
  -1   6  -8 155.139  12.324   3 
  -2   6  -8 11.1230  2.0913   3 
   2  -6   8 8.42992 1.64571   9 
  -3   6  -8 40.1224  4.4152   3 
  -4   6  -8 100.071   9.862  15 
  -4   6  -8 98.9811  6.8953   4 
  -4   6  -8 117.086  12.784   1 
  -5   6  -8 151.553  13.949  15 
  -5   6  -8 148.550  10.567   7 
  -5   6  -8 162.145  17.773   1 
  -5   6  -8 158.299   9.702   4 
  -6   6  -8 41.4593  6.6612   1 
  -6   6  -8 51.0077  3.7794   4 
  -6   6  -8 48.1764  4.0398   7 
  -6   6  -8 54.8804  5.3095  15 
  -7   6  -8 57.7818  7.8548   1 
  -7   6  -8 76.5506  4.3313   4 
  -7  -5   8 4.65367 0.84825   8 
  -6  -5   8 22.8282  2.1561   6 
  -6  -5   8 22.1766  2.1486   8 
  -6  -5   8 20.6111  3.1448   2 
  -5  -5   8 187.027  12.107   8 
  -5  -5   8 188.840  12.996   6 
  -5  -5   8 196.675  14.195   2 
  -4  -5   8 1.91980 1.65875   2 
  -4  -5   8 3.58172 1.10896   8 
  -4  -5   8 3.73219 1.03858   6 
   3   5  -8 68.1121  5.5881   3 
  -3  -5   8 62.4162  5.2710   5 
   2   5  -8 412.341  29.012   3 
  -2  -5   8 369.013  24.257   5 
   1   5  -8 589.891  44.144   3 
  -1  -5   8 618.583  36.589   5 
   0   5  -8 496.873  36.858   3 
   0  -5   8 504.451  30.381   5 
  -1   5  -8 649.761  49.747   3 
   1  -5   8 707.748  40.817   5 
  -2   5  -8 354.638  26.669   3 
   3  -5   8 101.848   8.823   9 
  -4   5  -8 103.593   9.962  15 
  -4   5  -8 119.187  13.078   1 
  -4   5  -8 107.734   7.069   4 
  -4   5  -8 94.4318  7.5605   7 
  -5   5  -8 49.7559  5.4432  15 
  -5   5  -8 55.8049  7.5138   1 
  -5   5  -8 42.9745  4.2135   7 
  -5   5  -8 49.5269  4.0440   4 
  -6   5  -8 12.9334  1.8738   4 
  -6   5  -8 12.7456  3.6055   1 
  -6   5  -8 12.2387  2.4512  15 
  -7   5  -8 28.6807  3.1165  15 
  -7   5  -8 28.2873  2.1696   4 
  -7   5  -8 18.0074  3.9910   1 
  -7  -4   8 42.9007  3.2153   6 
  -7  -4   8 42.0169  3.0831   8 
  -6  -4   8 23.2316  2.5627   8 
  -6  -4   8 28.0405  3.7267   2 
  -6  -4   8 29.6481  2.5882   6 
  -5  -4   8 20.9659  2.3853   8 
  -5  -4   8 21.3773  3.4768   2 
  -5  -4   8 18.0581  2.2210   6 
  -4  -4   8 89.5727  7.1046   5 
  -4  -4   8 95.4369  6.7406   6 
  -4  -4   8 88.4287  6.3743   8 
  -4  -4   8 88.2166  7.6769   2 
   3   4  -8 31.9564  3.0774   3 
  -3  -4   8 31.6933  3.5014   5 
   2   4  -8 140.436  10.306   3 
  -2  -4   8 121.315   8.893   5 
   1   4  -8 61.2851  5.0743   3 
  -1  -4   8 58.0790  4.4803   5 
   0   4  -8 14.9170  2.0324   3 
   0  -4   8 17.4861  1.9963   5 
  -1   4  -8 34.6625  3.4003   3 
  -2   4  -8 90.2966  7.0557   3 
   2  -4   8 74.9574  5.5582   5 
   3  -4   8 50.7140  4.9347   9 
  -4   4  -8 336.299  33.314   1 
  -4   4  -8 293.214  17.791   4 
  -4   4  -8 298.455  26.279  15 
  -4   4  -8 299.095  19.414   7 
  -5   4  -8 154.272  17.516   1 
  -5   4  -8 136.915  13.416  15 
  -5   4  -8 156.219   9.464   4 
  -6   4  -8 24.6308  2.7090   4 
  -6   4  -8 27.4095  5.4598   1 
  -6   4  -8 24.2572  3.5920  15 
  -7   4  -8 15.1895  1.7352   4 
  -7   4  -8 18.0771  2.5928  15 
  -7   4  -8 16.0059  3.6122   1 
  -7  -3   8 13.4351  1.5706   8 
  -7  -3   8 16.3927  1.5713   6 
  -6  -3   8 51.7665  3.9337   8 
  -6  -3   8 47.9300  3.9961   6 
  -5  -3   8 169.668  11.860   6 
  -5  -3   8 177.226  12.981   2 
  -5  -3   8 167.650  11.109   8 
  -4  -3   8 220.156  15.750   2 
  -4  -3   8 217.020  14.699   6 
  -4  -3   8 211.991  13.718   8 
  -4  -3   8 215.843  14.524   5 
   3   3  -8 30.2082  3.0047   3 
  -3  -3   8 33.7947  3.6064   5 
   2   3  -8 255.552  18.442   3 
  -2  -3   8 233.439  15.623   5 
   1   3  -8 492.400  36.412   3 
  -1  -3   8 501.816  30.257   5 
   0   3  -8 304.543  23.705   3 
   0  -3   8 338.767  19.794   5 
  -1   3  -8 661.526  46.510   3 
   1  -3   8 609.141  38.202   5 
   2  -3   8 376.126  22.924   5 
   3  -3   8 233.917  14.784   5 
   3  -3   8 242.417  19.219   9 
  -4   3  -8 101.829   6.741   4 
  -4   3  -8 93.1170  9.4546  15 
  -4   3  -8 106.954  12.776   1 
  -5   3  -8 264.441  28.897   1 
  -5   3  -8 261.904  15.366   4 
  -5   3  -8 251.168  22.551  15 
  -6   3  -8 6.62439 2.00842  15 
  -6   3  -8 8.45385 3.53470   1 
  -6   3  -8 5.81404 1.41470   4 
  -7   3  -8 18.1225  4.2189   1 
  -7   3  -8 25.5127  2.1307   4 
  -7   3  -8 26.7403  3.1638  15 
  -7  -2   8 46.8969  3.1321   8 
  -7  -2   8 35.8820  3.1132   6 
  -6  -2   8 73.1352  5.2130   8 
  -6  -2   8 68.9152  5.3866   6 
  -5  -2   8 22.8331  2.5429   6 
  -5  -2   8 20.1226  1.9228   7 
  -5  -2   8 17.7302  2.4247   8 
  -4  -2   8 73.7471  5.6218   6 
  -4  -2   8 75.5296  5.0239   7 
  -4  -2   8 69.6871  5.3962   8 
  -4  -2   8 71.8437  6.6299   2 
  -4  -2   8 70.3271  6.0089   5 
   3   2  -8 310.447  23.254   3 
  -3  -2   8 313.939  19.863   5 
   2   2  -8 218.624  15.965   3 
  -2  -2   8 201.071  13.585   5 
   1   2  -8 265.343  20.127   3 
  -1  -2   8 276.380  16.942   5 
   0   2  -8 28.8624  2.7936   3 
   0  -2   8 29.8999  2.5597   5 
   1  -2   8 295.635  18.215   5 
   2  -2   8 214.628  13.429   5 
   3  -2   8 179.526  10.953   5 
   3  -2   8 163.553  14.151   9 
  -4   2  -8 44.0492  3.7240   4 
  -4   2  -8 48.6233  5.2593  15 
  -4   2  -8 42.4869  7.6429   1 
  -5   2  -8 141.474  12.254  15 
  -5   2  -8 130.255   8.359   4 
  -5   2  -8 112.737  15.814   1 
  -6   2  -8 171.544  22.092   1 
  -6   2  -8 204.363  17.471  15 
  -6   2  -8 205.923  11.737   4 
  -7   2  -8 64.8401  9.0440   1 
  -7   2  -8 79.7963  4.7082   4 
  -7  -1   8 28.1657  2.3895   8 
  -7  -1   8 29.6272  2.4532   6 
  -6  -1   8 123.465   8.756   6 
  -6  -1   8 118.714   8.210   8 
  -6  -1   8 125.486   7.893   7 
  -5  -1   8 280.939  17.721   7 
  -5  -1   8 295.128  18.115   8 
  -5  -1   8 290.355  19.425   6 
  -4  -1   8 173.445  11.137   7 
  -4  -1   8 173.465  12.238   6 
  -4  -1   8 183.674  11.575   8 
   3   1  -8 220.797  17.504   3 
  -3  -1   8 248.043  15.215   5 
   2   1  -8 813.397  58.064   3 
  -2  -1   8 778.827  48.121   5 
   1   1  -8 444.863  30.800   3 
  -1  -1   8 388.301  25.560   5 
   0  -1   8 484.187  29.391   5 
   1  -1   8 330.451  20.278   5 
   2  -1   8 656.508  39.486   5 
   3  -1   8 419.977  25.602   5 
  -4   1  -8 447.458  29.568   2 
  -4   1  -8 440.143  25.491   4 
  -4   1  -8 459.462  38.111  15 
  -5   1  -8 196.748  17.507  15 
  -5   1  -8 218.987  23.228   1 
  -5   1  -8 172.977  11.717   4 
  -6   1  -8 34.6955  6.8742   1 
  -6   1  -8 31.2305  4.1355  15 
  -6   1  -8 31.8744  3.0834   4 
  -7   1  -8 1.04273 1.05726  15 
  -7   1  -8 3.00996 2.16606   1 
  -7   0   8 15.6655  1.6073   8 
  -7   0   8 11.8675  1.4375   6 
  -6   0   8 68.6014  4.5836   7 
  -6   0   8 63.1343  4.8643   8 
  -6   0   8 65.2719  5.1118   6 
  -5   0   8 53.8352  4.1941   8 
  -5   0   8 44.7162  4.1006   6 
  -5   0   8 49.0098  3.6665   7 
  -4   0   8 881.894  56.976   6 
  -4   0   8 884.882  52.563   8 
  -4   0   8 869.318  52.527   7 
   3   0  -8 405.856  30.339   3 
  -3   0   8 413.422  25.048   8 
   2   0  -8 5.92823 1.31665   3 
  -2   0   8 8.25340 1.69113   5 
   1   0  -8 28.8083  2.7617   3 
  -1   0   8 25.9248  2.5678   5 
   0   0   8 87.8699  6.0510   5 
   1   0   8 21.4358  2.0559   5 
   2   0   8 43.9740  3.4491   5 
  -3   0  -8 473.462  30.678   2 
  -3   0  -8 467.211  28.620  13 
   3   0   8 457.736  28.375   5 
  -4   0  -8 1108.19   58.28   4 
  -4   0  -8 1018.99   68.35   2 
  -4   0  -8 1109.83   87.71  15 
  -4   0  -8 994.058 109.322   1 
  -5   0  -8 54.6358 11.1192   1 
  -5   0  -8 86.8569  5.6715   4 
  -5   0  -8 81.6812  8.0911  15 
  -5   0  -8 81.7387  6.0636   2 
  -6   0  -8 37.1562  4.6172  15 
  -6   0  -8 41.8025  7.4454   1 
  -7   0  -8 25.2615  4.8871   1 
  -7   0  -8 34.0890  3.5365  15 
  -7   1   8 15.4612  1.2619   7 
  -7   1   8 13.9069  1.5041   8 
  -7   1   8 13.1210  1.4177   6 
  -6   1   8 42.8847  3.1831   7 
  -6   1   8 43.1474  3.5204   8 
  -6   1   8 42.6879  3.5910   6 
  -5   1   8 49.0675  4.1719   8 
  -5   1   8 49.4295  3.7610   7 
  -5   1   8 52.8543  4.3199   6 
  -4   1   8 131.274   7.480   4 
  -4   1   8 132.765   8.256   7 
  -4   1   8 113.941   8.519   8 
  -4   1   8 118.650   8.999   6 
  -3   1   8 749.977  47.187   8 
  -3   1   8 825.489  47.309   7 
   2  -1  -8 2.44758 1.04919   3 
  -1   1   8 281.097  17.585   5 
   0   1   8 558.378  33.801   5 
   1   1   8 296.111  18.347   5 
  -2  -1  -8 22.4918  2.9297  13 
   2   1   8 21.1685  2.3315   5 
  -3  -1  -8 513.952  28.696  14 
  -3  -1  -8 560.783  32.545  13 
  -3  -1  -8 520.900  34.803   2 
  -3  -1  -8 529.326  29.815   4 
  -4  -1  -8 176.673  16.259  15 
  -4  -1  -8 187.950  11.110   4 
  -4  -1  -8 174.353  12.552   2 
  -4  -1  -8 186.406  21.776   1 
  -5  -1  -8 86.6764  6.5612   2 
  -5  -1  -8 85.6799  8.6477  15 
  -6  -1  -8 42.4797  7.6686   1 
  -6  -1  -8 47.6897  3.8128   2 
  -6  -1  -8 42.8462  5.0151  15 
   6   1   8 47.6221  3.9204   2 
  -7  -1  -8 10.3096  1.7297  15 
  -7  -1  -8 8.93074 2.59936   1 
  -7   2   8 14.4957  1.3724   6 
  -6   2   8 14.1702  1.7410   6 
  -6   2   8 14.0143  1.7775   8 
  -6   2   8 11.6779  1.3968   7 
  -5   2   8 97.9685  7.2556   8 
  -5   2   8 104.357   6.312   4 
  -5   2   8 106.622   6.986   7 
  -5   2   8 109.178   7.754   6 
  -4   2   8 605.025  32.688   4 
  -4   2   8 611.426  35.847   7 
  -4   2   8 575.838  35.948   8 
  -4   2   8 580.313  38.860   6 
  -3   2   8 100.946   6.790   7 
  -3   2   8 100.687   7.153   8 
  -3   2   8 101.137   6.252   4 
  -2   2   8 29.9594  3.0491   8 
  -2   2   8 28.2367  2.6796  10 
   1  -2  -8 339.854  20.978  13 
  -1   2   8 342.430  28.021  12 
   0  -2  -8 51.6894  4.1895  13 
   0   2   8 42.9633  5.1284  12 
   0   2   8 54.7372  3.9414   5 
  -1  -2  -8 316.241  19.157  13 
   1   2   8 294.679  18.861   5 
  -2  -2  -8 80.3035  6.1919  13 
  -2  -2  -8 76.1939  6.0676   2 
   2   2   8 82.4190  5.7285   5 
  -3  -2  -8 342.205  21.450  13 
  -3  -2  -8 327.244  22.670   2 
  -3  -2  -8 343.330  18.973  14 
  -3  -2  -8 347.848  19.605   4 
  -4  -2  -8 489.759  29.236   2 
  -4  -2  -8 409.651  37.193  15 
  -4  -2  -8 416.675  47.509   1 
  -5  -2  -8 93.9875  6.7659   2 
  -5  -2  -8 92.6272  8.8053  15 
  -5  -2  -8 77.3470 12.0386   1 
  -6  -2  -8 6.91643 3.28111   1 
  -6  -2  -8 8.46811 1.93420  15 
   6   2   8 9.20810 1.51868   2 
  -6   3   8 29.8758  2.6130   8 
  -6   3   8 31.9815  2.7216   6 
  -6   3   8 33.6756  2.4529   7 
  -5   3   8 51.7827  3.3970   4 
  -5   3   8 46.3201  4.1000   6 
  -5   3   8 56.5107  3.7748   7 
  -5   3   8 46.0901  3.9888   8 
  -4   3   8 129.308   9.032   6 
  -4   3   8 115.235   7.438   4 
  -4   3   8 131.790   8.209   7 
  -4   3   8 122.458   8.562   8 
  -3   3   8 329.060  21.037   8 
  -3   3   8 354.124  19.081   4 
  -3   3   8 331.832  20.742   7 
   2  -3  -8 159.508  10.624  13 
  -2   3   8 167.558   9.600   4 
  -2   3   8 157.393  10.451  10 
  -2   3   8 162.972  10.295   7 
  -2   3   8 161.120  10.643   8 
   1  -3  -8 1.52013 1.13452  13 
   1  -3  -8 0.71101 0.91655   4 
  -1   3   8 1.66190 1.21281  10 
   0  -3  -8 97.5200  6.7542  13 
   0  -3  -8 87.2195  5.9290   4 
  -1  -3  -8 7.61836 1.51275   4 
  -1  -3  -8 5.29818 1.64829  13 
   1   3   8 7.35277 1.40876   5 
   1   3   8 5.06702 1.50558   2 
  -2  -3  -8 94.0146  6.3286   4 
  -2  -3  -8 93.2439  7.0575   2 
  -2  -3  -8 97.4787  7.1679  13 
  -3  -3  -8 173.603   9.926  14 
  -3  -3  -8 161.917  11.192  13 
  -3  -3  -8 157.663  11.475   2 
  -4  -3  -8 7.16931 3.97489   1 
  -4  -3  -8 10.7142  1.7383   2 
  -5  -3  -8 5.98011 3.61584   1 
  -5  -3  -8 9.48875 2.09475  15 
  -5  -3  -8 6.61893 1.35243   2 
  -6  -3  -8 19.0464  4.3167   1 
  -6  -3  -8 24.6782  2.8351  15 
   6   3   8 25.0307  2.2906   2 
   6  -4  -8 4.04651 0.71687   4 
  -6   4   8 3.66035 0.87055   8 
  -6   4   8 3.96235 0.67649   7 
  -6   4   8 3.89167 0.81782   6 
  -5   4   8 1.80255 0.84247   6 
  -5   4   8 3.86918 1.10787   8 
  -5   4   8 2.07964 0.71600   7 
  -5   4   8 3.68116 0.78672   4 
  -4   4   8 67.7603  4.9455   7 
  -4   4   8 78.3147  4.6944   4 
  -4   4   8 72.8146  5.4330   8 
  -4   4   8 70.7479  5.5251   6 
   3  -4  -8 174.105  11.933  13 
  -3   4   8 190.972  10.913   4 
  -3   4   8 194.576  11.796   7 
  -3   4   8 186.149  12.200   8 
   2  -4  -8 25.2834  2.4657   4 
   2  -4  -8 24.6182  2.8679  13 
  -2   4   8 23.4885  2.7536   8 
  -2   4   8 25.4400  2.6311  10 
  -2   4   8 22.4759  2.2722   4 
   1  -4  -8 61.3264  4.7605  13 
   1  -4  -8 57.3773  4.1988   4 
  -1   4   8 59.3997  4.7578  10 
   0  -4  -8 20.1194  2.6635  13 
   0  -4  -8 16.9275  2.1063   4 
  -1  -4  -8 62.0677  4.4679   4 
  -1  -4  -8 64.2036  5.1372  13 
   1   4   8 60.9369  5.1567   2 
  -2  -4  -8 30.1195  2.9763   2 
  -2  -4  -8 33.1751  3.1447   4 
  -2  -4  -8 29.9584  3.5999  13 
   2   4   8 30.5636  3.4320   2 
  -3  -4  -8 155.566  11.539   2 
  -3  -4  -8 173.286  11.308  13 
  -3  -4  -8 173.601   9.949  14 
  -4  -4  -8 48.5394  9.0081   1 
  -4  -4  -8 76.7261  5.2343   2 
  -5  -4  -8 4.31305 1.05657   2 
  -5  -4  -8 0.64727 2.54409   1 
   5   4   8 3.31609 1.12061   2 
   5  -5  -8 17.7974  1.5767   4 
  -5   5   8 18.2913  1.5640   7 
  -5   5   8 19.1673  1.8251   6 
  -5   5   8 16.7346  1.9168   8 
  -4   5   8 8.30098 1.54434   8 
  -4   5   8 10.4833  1.2617   7 
  -4   5   8 10.5970  1.3157   4 
   3  -5  -8 16.3102  2.1703  13 
   3  -5  -8 15.4745  1.8367   4 
  -3   5   8 15.7412  2.2075   8 
  -3   5   8 18.1197  1.8409   4 
   2  -5  -8 0.15012 0.79326   4 
   2  -5  -8 -0.3035  0.9059  13 
  -2   5   8 0.36771 0.97842   8 
  -2   5   8 -0.9382  0.7613  10 
   1  -5  -8 24.4964  2.8171  13 
   1  -5  -8 24.3844  2.4097   4 
  -1   5   8 25.3541  2.8961  10 
   0  -5  -8 40.9812  3.7152  13 
   0  -5  -8 39.5801  3.2011   4 
  -1  -5  -8 32.4330  2.8400   4 
  -1  -5  -8 36.4644  3.4460  13 
  -2  -5  -8 1.32198 1.24227  13 
   2   5   8 0.10595 1.06036   2 
  -3  -5  -8 11.7316  1.7491   2 
  -3  -5  -8 8.31940 1.64055  14 
  -3  -5  -8 14.1622  2.1419  13 
   3   5   8 13.3156  1.9852   2 
  -4  -5  -8 4.59925 1.07452   2 
  -4  -5  -8 2.00640 2.85587   1 
   4   5   8 5.33855 1.26592   2 
   5   5   8 47.4306  3.7680   2 
   5  -6  -8 6.99063 0.86363   4 
   4  -6  -8 2.34753 0.75942   4 
  -4   6   8 2.40379 0.92793   8 
   3  -6  -8 64.5117  4.9751  13 
   3  -6  -8 75.7741  4.6569   4 
  -3   6   8 72.6977  5.1961   8 
   2  -6  -8 46.6531  3.9841  13 
   2  -6  -8 50.5871  3.6166   4 
  -2   6   8 53.1257  3.7354  10 
  -2   6   8 50.7811  4.0511   8 
   1  -6  -8 12.6911  1.6389   4 
  -1   6   8 13.4123  1.8980  10 
   0  -6  -8 138.229   8.938  13 
   0  -6  -8 125.686   7.913   4 
   0   6   8 128.125   8.917  10 
  -1  -6  -8 35.2939  3.3627  13 
  -2  -6  -8 52.6274  4.0120  14 
  -2  -6  -8 55.4909  4.4453  13 
  -3  -6  -8 37.6600  3.0093  14 
  -3  -6  -8 45.2746  3.6161  13 
   3   6   8 43.3825  3.6399   2 
   4   6   8 7.78275 1.33697   2 
   4  -7  -8 6.95378 0.92057   4 
   3  -7  -8 3.12852 0.95944  13 
   3  -7  -8 3.48462 0.84683   4 
  -3   7   8 4.62717 1.03554   8 
   2  -7  -8 27.1757  2.5208  13 
   2  -7  -8 27.7115  2.2323   4 
  -2   7   8 27.6352  2.5140   8 
   1  -7  -8 42.9174  3.5937  13 
   1  -7  -8 45.4354  3.1800   4 
  -1   7   8 43.4210  3.4405  10 
   0  -7  -8 59.7233  4.5966  13 
   0   7   8 58.8942  4.5433  10 
  -1  -7  -8 37.9587  3.3394  13 
  -2  -7  -8 70.2331  4.9755  13 
  -2  -7  -8 64.7976  4.4200  14 
   2  -8  -8 22.1291  1.7516   4 
   1  -8  -8 201.822  12.855  13 
  -1   8   8 211.530  12.595  10 
   0  -8  -8 182.850  11.853  13 
   0   8   8 194.707  11.808  10 
  -1  -8  -8 174.488  11.565  13 
   1   8   8 196.645  11.703  10 
   2  14  -9 13.7067  1.4151   6 
  -2 -14   9 11.2326  2.2126  15 
   1  14  -9 20.2238  2.0804   6 
  -1 -14   9 26.5496  3.2669  15 
   0  14  -9 101.933   7.641   6 
   0  14  -9 101.051   7.005  10 
   0 -14   9 127.510  10.316  15 
  -1  14  -9 21.6815  1.9615  10 
  -1  14  -9 24.3902  2.3289   6 
   1 -14   9 26.9773  3.2224  15 
  -2  14  -9 5.75118 1.08581   6 
   3  13  -9 0.99539 0.51971   8 
   3  13  -9 0.85451 0.66563   6 
  -3 -13   9 0.88277 1.32474  15 
   2  13  -9 19.6955  1.9887   6 
  -2 -13   9 16.4295  3.1500  15 
   1  13  -9 14.9918  1.9046   6 
  -1 -13   9 14.3143  2.9035  15 
   0  13  -9 17.4984  2.2905   6 
   0 -13   9 20.7935  3.4477  15 
  -1  13  -9 9.79351 1.52129  10 
  -1  13  -9 7.90802 1.61764   6 
   1 -13   9 15.9119  2.7208  15 
  -2  13  -9 32.1012  2.3685  10 
  -2  13  -9 30.8398  2.9074   6 
   2 -13   9 21.6931  3.6106  15 
  -3  13  -9 15.6849  1.8590   6 
   3 -13   9 11.8255  2.8998   1 
   4  12  -9 6.32911 1.02939   6 
  -4 -12   9 6.84092 1.96050  15 
   3  12  -9 39.4310  3.1579   6 
  -3 -12   9 34.7740  4.7610  15 
   2  12  -9 28.5301  2.6969   6 
  -2 -12   9 29.6894  4.6705  15 
   1  12  -9 46.9009  3.9774   6 
  -1 -12   9 45.7914  5.6439  15 
   0  12  -9 6.18133 1.50698   6 
   0 -12   9 5.44395 2.11077  15 
  -1  12  -9 68.6012  5.1579  10 
  -1  12  -9 69.0185  5.6824   6 
   1 -12   9 70.5606  7.4563  15 
  -2  12  -9 13.0767  2.1322   6 
  -2  12  -9 16.0547  1.9441  10 
   2 -12   9 16.0549  2.9770  15 
  -3  12  -9 31.8450  2.9640   6 
   3 -12   9 29.3664  4.7722   1 
   3 -12   9 24.5835  3.7845  15 
  -4  12  -9 26.1896  2.0758   7 
   4 -12   9 18.1388  3.8746   1 
   4  11  -9 10.6068  1.3774   6 
  -4 -11   9 10.0745  1.7160   2 
  -4 -11   9 12.5701  2.7948  15 
   3  11  -9 4.32637 1.02193   6 
  -3 -11   9 7.07987 2.56913  15 
   2  11  -9 23.4697  2.3561   6 
  -2 -11   9 21.9572  4.0267  15 
   1  11  -9 59.0930  4.5679   6 
  -1 -11   9 47.9154  6.2579  15 
   0  11  -9 35.5443  3.5601   6 
   0 -11   9 43.9327  5.2560  15 
  -1  11  -9 77.1869  6.3802   6 
   1 -11   9 83.0195  8.5097  15 
  -2  11  -9 15.9718  2.4389   6 
  -2  11  -9 16.9413  2.1300  10 
   2 -11   9 13.8234  3.0550  15 
  -3  11  -9 79.9155  4.7418  10 
  -3  11  -9 65.9024  5.1190   7 
   3 -11   9 57.7627  8.8950   1 
  -4  11  -9 21.5869  2.1893   7 
  -4  11  -9 15.8493  3.0868   1 
   4 -11   9 15.0525  3.7364   1 
   5  10  -9 31.3705  2.5610   6 
   4  10  -9 88.8418  6.2247   6 
  -4 -10   9 86.6390  5.6675   8 
  -4 -10   9 83.3008  6.7243   2 
  -4 -10   9 81.1528  8.9511  15 
  -3 -10   9 73.5306  6.2394   2 
  -3 -10   9 76.5914  5.1210   8 
  -3 -10   9 74.8333  8.4221  15 
   2  10  -9 35.0422  3.1273   6 
  -2 -10   9 33.9578  5.4222  15 
   1  10  -9 79.6562  5.8667   6 
  -1 -10   9 70.0933  8.0765  15 
   0  10  -9 0.15666 0.89750   6 
   0 -10   9 -0.5348  1.3702  15 
  -1  10  -9 81.6821  6.4745   6 
  -2  10  -9 81.8896  5.9046  10 
  -2  10  -9 85.9940  6.5500   6 
  -2  10  -9 74.2050  5.9032   7 
  -3  10  -9 31.9711  2.6133  10 
  -3  10  -9 28.5097  4.5248   1 
  -3  10  -9 25.6908  3.0832   7 
  -4  10  -9 105.283  11.986   1 
  -4  10  -9 104.118   7.420   7 
  -5  10  -9 30.4280  2.5845   7 
  -5  10  -9 22.4701  3.7066   1 
  -6  10  -9 3.89108 0.83275   7 
  -6  -9   9 4.20598 1.04196   2 
  -5  -9   9 11.4319  2.0603   2 
  -5  -9   9 13.2959  1.4595   8 
  -4  -9   9 38.5498  2.9600   8 
  -4  -9   9 39.7987  3.2006   6 
  -4  -9   9 33.1854  4.0428   2 
  -3  -9   9 76.4187  6.8412   2 
  -3  -9   9 90.9418  9.3167  15 
  -3  -9   9 84.1966  5.6627   8 
  -3  -9   9 85.3078  6.1950   6 
  -2  -9   9 491.570  30.494   6 
  -2  -9   9 432.357  39.876  15 
  -1  -9   9 49.2516  6.0265  15 
   0  -9   9 9.60370 2.65460  15 
  -1   9  -9 47.4992  4.1599   7 
  -1   9  -9 57.3944  4.5858   6 
  -2   9  -9 663.153  41.016   7 
  -2   9  -9 684.461  40.642  10 
  -3   9  -9 218.112  23.665   1 
  -3   9  -9 224.517  14.427   7 
  -3   9  -9 216.357  13.726  10 
  -4   9  -9 8.51963 2.47625   1 
  -4   9  -9 10.5643  1.9592   7 
  -5   9  -9 57.9654  4.5460   7 
  -5   9  -9 53.9027  3.7902   4 
  -5   9  -9 58.7581  7.1689   1 
  -6   9  -9 32.8957  2.6036   7 
  -6   9  -9 29.8962  2.1669   4 
  -6   9  -9 28.2505  4.0580   1 
  -6  -8   9 35.3060  2.6188   8 
  -6  -8   9 38.3789  3.4131   2 
  -5  -8   9 106.535   7.340   6 
  -5  -8   9 110.237   6.847   8 
  -5  -8   9 92.3626  8.0176   2 
  -4  -8   9 56.8229  4.4206   6 
  -4  -8   9 54.5576  5.2759   2 
  -4  -8   9 58.2258  4.1505   8 
  -3  -8   9 203.150  13.486   6 
  -3  -8   9 180.079  14.201   2 
  -3  -8   9 206.872  12.414   8 
  -2  -8   9 17.5596  3.8118  15 
  -2  -8   9 19.8700  3.0104   2 
  -2  -8   9 19.1021  2.1850   6 
  -2   8  -9 31.9235  3.0881  10 
  -2   8  -9 31.8719  3.4282   7 
  -3   8  -9 155.166  10.163  10 
  -3   8  -9 162.599  17.548   1 
  -3   8  -9 150.479  10.748   7 
  -3   8  -9 159.410  14.299  15 
  -4   8  -9 78.8178  8.8709   1 
  -4   8  -9 65.4154  5.5332   7 
  -4   8  -9 66.7950  6.9631  15 
  -4   8  -9 64.7551  4.6961   4 
  -5   8  -9 82.5999  5.7531   7 
  -5   8  -9 77.5649  4.9669   4 
  -5   8  -9 65.4697  8.8296   1 
  -5   8  -9 71.2377  7.1542  15 
  -6   8  -9 28.9559  2.2071   4 
  -6   8  -9 25.4672  2.4494   7 
  -6   8  -9 26.0420  3.9771   1 
  -6  -7   9 16.2484  1.5155   6 
  -6  -7   9 11.3545  1.3941   8 
  -6  -7   9 16.3712  2.3685   2 
  -5  -7   9 23.0093  3.4602   2 
  -5  -7   9 29.2162  2.5564   8 
  -5  -7   9 34.0258  2.7358   6 
  -4  -7   9 42.5072  4.8424   2 
  -4  -7   9 41.8377  3.3763   8 
  -4  -7   9 43.1417  3.5574   6 
  -3  -7   9 101.627   6.605   8 
  -3  -7   9 100.632   7.106   6 
  -3  -7   9 88.6758  7.8527   2 
  -2  -7   9 657.345  40.617   5 
  -2  -7   9 673.481  43.952   2 
   1   7  -9 520.645  39.008   3 
  -1  -7   9 534.143  32.331   5 
   0   7  -9 36.0608  3.8476   3 
  -1   7  -9 537.751  40.061   3 
  -3   7  -9 147.893   9.821   7 
  -3   7  -9 141.276   9.158  10 
  -3   7  -9 124.735   8.513   4 
  -3   7  -9 147.246  12.894  15 
  -4   7  -9 114.128  13.729   1 
  -4   7  -9 120.937   7.580   4 
  -4   7  -9 126.275   8.613   7 
  -4   7  -9 114.548  11.014  15 
  -5   7  -9 47.0117  4.1337   7 
  -5   7  -9 50.8095  3.7411   4 
  -5   7  -9 45.4112  5.0926  15 
  -5   7  -9 45.6493  6.4910   1 
  -6   7  -9 1.55182 0.94122   7 
  -6   7  -9 1.05778 1.09146  15 
  -6   7  -9 2.09561 1.58286   1 
  -6   7  -9 1.56497 0.82594   4 
  -7   7  -9 75.7227  4.5376   4 
  -6  -6   9 11.4078  1.3636   8 
  -6  -6   9 8.77173 1.24503   6 
  -6  -6   9 10.7799  2.1358   2 
  -5  -6   9 108.174   9.488   2 
  -5  -6   9 128.263   8.131   8 
  -5  -6   9 127.367   8.671   6 
  -4  -6   9 133.435  10.440   2 
  -4  -6   9 127.758   8.751   8 
  -4  -6   9 139.763   9.436   6 
  -3  -6   9 41.7661  3.5889   6 
  -3  -6   9 42.4290  4.8488   2 
  -3  -6   9 46.0466  3.4946   8 
   2   6  -9 197.052  14.238   3 
  -2  -6   9 166.966  12.107   5 
   1   6  -9 11.1195  1.8693   3 
  -1  -6   9 9.38492 1.76275   5 
   0   6  -9 17.2020  2.5127   3 
   0  -6   9 17.1604  2.2002   5 
  -1   6  -9 3.87251 1.38275   3 
  -2   6  -9 296.050  22.702   3 
  -3   6  -9 49.3651  4.3595   7 
  -3   6  -9 51.0313  3.9304   4 
  -3   6  -9 53.6645  5.6790  15 
  -4   6  -9 511.014  32.167   7 
  -4   6  -9 518.738  43.761  15 
  -4   6  -9 488.185  29.232   4 
  -4   6  -9 561.996  54.381   1 
  -5   6  -9 230.666  23.932   1 
  -5   6  -9 206.452  14.169   7 
  -5   6  -9 212.235  19.034  15 
  -5   6  -9 220.454  12.998   4 
  -6   6  -9 22.2688  4.2804   1 
  -6   6  -9 23.8847  3.1564  15 
  -6   6  -9 23.9991  2.5759   7 
  -6   6  -9 25.5743  2.4576   4 
  -7   6  -9 2.81917 1.35499   1 
  -7   6  -9 2.80001 0.72639   4 
  -7  -5   9 0.81960 0.48611   8 
  -7  -5   9 1.36947 0.50642   6 
  -6  -5   9 8.88547 2.06507   2 
  -6  -5   9 7.10413 1.17029   6 
  -6  -5   9 7.12971 1.22849   8 
  -5  -5   9 53.9038  4.0769   8 
  -5  -5   9 38.7999  5.1017   2 
  -5  -5   9 56.2548  4.2282   6 
  -4  -5   9 642.334  35.885   8 
  -4  -5   9 575.030  39.881   2 
  -4  -5   9 569.096  38.792   6 
  -3  -5   9 146.865   9.496   8 
  -3  -5   9 132.368  10.105   5 
  -3  -5   9 158.380  10.242   6 
  -3  -5   9 143.193  11.039   2 
   2   5  -9 132.160  10.071   3 
  -2  -5   9 119.669   8.756   5 
   1   5  -9 185.177  14.158   3 
  -1  -5   9 181.428  11.989   5 
   0   5  -9 840.361  63.702   3 
   0  -5   9 906.673  52.510   5 
  -1   5  -9 145.486  12.730   3 
   1  -5   9 181.694  10.679   5 
  -2   5  -9 100.512   8.531   3 
  -3   5  -9 139.771  12.763  15 
  -4   5  -9 265.106  21.996  15 
  -4   5  -9 256.016  14.968   4 
  -4   5  -9 241.556  27.398   1 
  -4   5  -9 244.172  16.303   7 
  -5   5  -9 337.191  37.110   1 
  -5   5  -9 335.341  29.716  15 
  -5   5  -9 338.475  21.889   7 
  -5   5  -9 387.906  20.246   4 
  -6   5  -9 4.50703 2.33519   1 
  -6   5  -9 4.79187 1.56543  15 
  -6   5  -9 6.28372 1.36080   4 
  -7   5  -9 9.40221 2.32746   1 
  -7   5  -9 8.54066 1.62991  15 
  -7   5  -9 8.53376 1.15013   4 
  -7  -4   9 14.9760  1.3945   8 
  -7  -4   9 14.8563  1.4025   6 
  -6  -4   9 49.1983  3.6212   6 
  -6  -4   9 41.4131  3.3906   8 
  -6  -4   9 39.3779  4.2634   2 
  -5  -4   9 401.497  27.216   2 
  -5  -4   9 397.197  24.157   8 
  -5  -4   9 389.337  26.086   6 
  -4  -4   9 597.916  35.073   8 
  -4  -4   9 559.610  39.002   2 
  -4  -4   9 584.047  37.961   6 
  -3  -4   9 177.018  12.903   2 
  -3  -4   9 167.849  11.841   5 
  -3  -4   9 177.124  11.176   8 
   2   4  -9 14.5732  2.0625   3 
  -2  -4   9 16.1305  2.3337   5 
   1   4  -9 357.535  27.084   3 
  -1  -4   9 372.791  22.683   5 
   0   4  -9 183.977  14.453   3 
   0  -4   9 192.619  12.152   5 
  -1   4  -9 375.561  28.775   3 
   1  -4   9 397.233  23.780   5 
   2  -4   9 6.47959 1.31470   5 
  -4   4  -9 1060.10   85.05  15 
  -4   4  -9 1086.73  105.55   1 
  -4   4  -9 1000.65   56.59   4 
  -4   4  -9 960.135  61.849   7 
  -5   4  -9 33.4077  6.5521   1 
  -5   4  -9 41.6766  3.5725   4 
  -5   4  -9 44.9031  4.8508  15 
  -6   4  -9 51.5933  5.1233  15 
  -6   4  -9 34.8411  6.3983   1 
  -6   4  -9 48.0242  3.5732   4 
  -7   4  -9 31.8290  4.6205   1 
  -7   4  -9 33.0445  2.4103   4 
  -7   4  -9 31.9635  3.5516  15 
  -7  -3   9 23.6690  1.9383   8 
  -7  -3   9 24.0883  2.0014   6 
  -6  -3   9 16.5164  1.9888   8 
  -6  -3   9 17.1857  1.9991   6 
  -5  -3   9 85.2769  7.4971   2 
  -5  -3   9 85.1406  6.5086   6 
  -5  -3   9 92.4694  6.3133   8 
  -4  -3   9 257.526  16.503   7 
  -4  -3   9 260.718  19.088   2 
  -4  -3   9 268.893  16.850   8 
  -4  -3   9 286.483  18.120   6 
  -3  -3   9 66.7848  4.9775   8 
  -3  -3   9 66.9636  6.0930   2 
  -3  -3   9 68.0991  5.5831   5 
   2   3  -9 78.6805  6.2950   3 
  -2  -3   9 68.8109  5.6621   5 
   1   3  -9 289.604  21.695   3 
  -1  -3   9 289.599  18.241   5 
   0   3  -9 29.4016  2.9209   3 
   0  -3   9 24.9438  2.7817   5 
   1  -3   9 294.775  18.373   5 
   2  -3   9 62.6107  4.6359   5 
  -4   3  -9 121.472  13.895   1 
  -4   3  -9 106.289   7.315   4 
  -4   3  -9 105.710  10.390  15 
  -5   3  -9 79.2785  5.4296   4 
  -5   3  -9 71.6042 10.0712   1 
  -5   3  -9 71.5272  7.4741  15 
  -6   3  -9 36.7032  4.1532  15 
  -6   3  -9 32.9716  6.0359   1 
  -6   3  -9 27.5264  2.8595   4 
  -7   3  -9 4.03170 0.87350   4 
  -7   3  -9 2.61544 1.77362   1 
  -7   3  -9 3.57549 1.22612  15 
  -7  -2   9 4.12456 0.79398   6 
  -7  -2   9 6.00864 0.92965   8 
  -6  -2   9 21.0481  2.1207   6 
  -6  -2   9 19.4542  2.1622   8 
  -5  -2   9 14.1963  1.6083   7 
  -5  -2   9 13.7478  2.0059   8 
  -5  -2   9 10.6619  1.7319   6 
  -4  -2   9 61.9192  4.5337   7 
  -4  -2   9 69.0796  6.2225   2 
  -4  -2   9 67.8260  5.0158   8 
  -4  -2   9 62.9775  5.0696   6 
  -3  -2   9 306.455  21.192   2 
  -3  -2   9 319.080  19.642   5 
  -3  -2   9 291.704  18.822   8 
   2   2  -9 677.146  47.074   3 
  -2  -2   9 602.837  39.129   5 
   1   2  -9 127.533   9.151   3 
  -1  -2   9 97.7583  7.7447   5 
   0  -2   9 36.4340  3.1505   5 
   1  -2   9 61.4633  4.6069   5 
   2  -2   9 973.267  58.279   5 
  -3   2  -9 134.851   8.232   4 
   3  -2   9 128.304   8.471   5 
   3  -2   9 120.850   9.182   2 
  -4   2  -9 58.8935  4.3165   4 
  -4   2  -9 48.5826  5.6327  15 
  -4   2  -9 49.6699  8.0325   1 
  -5   2  -9 90.4210  8.9020  15 
  -5   2  -9 88.5391  6.2080   4 
  -5   2  -9 92.6152 12.0169   1 
  -6   2  -9 37.1159  6.3245   1 
  -6   2  -9 27.1822  2.8189   4 
  -6   2  -9 33.0585  4.0366  15 
  -7   2  -9 3.07158 1.20422  15 
  -7   2  -9 1.59924 1.66185   1 
  -7  -1   9 4.09923 0.75354   6 
  -6  -1   9 5.68699 0.95073   7 
  -6  -1   9 5.95402 1.16018   6 
  -6  -1   9 7.36133 1.35474   8 
  -5  -1   9 48.4706  3.8141   6 
  -5  -1   9 39.0468  3.2153   7 
  -5  -1   9 42.3488  3.6441   8 
  -4  -1   9 0.45408 0.95050   8 
  -4  -1   9 2.09607 0.80130   7 
  -4  -1   9 1.36335 0.92206   6 
  -3  -1   9 144.493   8.870   7 
  -3  -1   9 128.396   9.551   5 
  -3  -1   9 139.537   9.622   6 
  -3  -1   9 132.292  10.389   2 
  -3  -1   9 131.959   9.063   8 
   2   1  -9 179.964  13.323   3 
  -2  -1   9 161.680  11.435   5 
   1   1  -9 824.142  60.439   3 
  -1  -1   9 836.163  50.071   5 
   0  -1   9 200.072  12.860   5 
   1  -1   9 755.479  45.513   5 
  -2   1  -9 44.0354  3.9641  13 
   2  -1   9 46.7156  3.6724   5 
  -3   1  -9 277.222  15.981   4 
  -3   1  -9 260.810  23.378  15 
   3  -1   9 278.097  18.492   2 
  -4   1  -9 78.4056  7.8883  15 
  -4   1  -9 67.6604 10.6615   1 
  -4   1  -9 77.8141  5.6314   4 
   4  -1   9 88.1560  6.3261   2 
  -5   1  -9 9.39426 1.77326   4 
  -5   1  -9 7.53411 2.11920  15 
  -5   1  -9 7.88222 3.96900   1 
   5  -1   9 9.43001 1.79814   2 
  -6   1  -9 11.9977  2.3515  15 
  -6   1  -9 9.91898 1.59740   4 
  -6   1  -9 11.5513  3.6953   1 
  -7   1  -9 28.3739  3.1274  15 
  -7   0   9 51.4386  3.6952   6 
  -6   0   9 18.0096  2.0066   8 
  -6   0   9 14.3626  1.8039   6 
  -6   0   9 16.5128  1.5607   7 
  -5   0   9 85.7110  6.2243   6 
  -5   0   9 87.2533  6.0194   8 
  -5   0   9 75.2052  5.5288   7 
  -4   0   9 333.527  20.049   7 
  -4   0   9 316.645  20.265   8 
  -4   0   9 326.634  21.771   6 
   3   0  -9 205.464  12.095   4 
  -3   0   9 199.743  14.178   6 
  -3   0   9 206.395  13.335   8 
  -3   0   9 217.037  12.001   4 
  -3   0   9 212.642  13.118   7 
   2   0  -9 572.969  42.550   3 
  -2   0   9 587.638  35.517   5 
  -1   0   9 184.082  12.040   5 
   0   0   9 0.10023 0.76961   5 
  -1   0  -9 214.170  14.175  13 
   1   0   9 227.188  14.098   5 
  -2   0  -9 381.034  23.295  13 
   2   0   9 352.152  23.021   5 
   2   0   9 390.814  25.081   2 
  -3   0  -9 365.586  25.133   2 
  -3   0  -9 367.692  21.661   4 
  -3   0  -9 386.819  23.679  13 
   3   0   9 394.075  25.381   2 
  -4   0  -9 92.0176  8.7878  15 
  -4   0  -9 87.6254  6.7435   2 
  -4   0  -9 86.5664  6.1750   4 
   4   0   9 89.9322  6.9400   2 
  -5   0  -9 54.9015  5.8195  15 
  -5   0  -9 48.9433  8.6874   1 
  -5   0  -9 53.2032  4.1190   4 
   5   0   9 53.5474  4.5621   2 
  -6   0  -9 12.4212  3.8087   1 
  -6   0  -9 13.8292  2.4520  15 
  -6   1   9 25.9122  2.3810   8 
  -6   1   9 26.6067  2.1534   7 
  -6   1   9 29.7080  2.4738   6 
  -5   1   9 20.0237  2.3514   8 
  -5   1   9 14.9453  1.8014   7 
  -5   1   9 19.4783  2.2484   6 
  -4   1   9 116.965   8.568   6 
  -4   1   9 125.199   7.880   7 
  -4   1   9 116.282   7.130   4 
  -4   1   9 116.356   8.185   8 
   3  -1  -9 199.929  11.423   4 
  -3   1   9 207.917  11.312   4 
  -3   1   9 187.247  12.250   7 
  -3   1   9 180.039  12.480   8 
   2  -1  -9 9.52728 1.61103   4 
  -2   1   9 11.7780  1.7645  10 
  -2   1   9 11.1934  1.5368   7 
  -1   1   9 89.1540  6.3128   5 
  -1   1   9 86.1034  6.8203   2 
  -1   1   9 83.3194  6.2495  10 
   0  -1  -9 0.64857 1.16556  13 
   0   1   9 0.81768 0.90622   5 
  -1  -1  -9 44.5722  4.1369  13 
   1   1   9 54.0496  4.3352   2 
   1   1   9 42.1176  3.7101   5 
  -2  -1  -9 37.2070  3.4709   4 
  -2  -1  -9 28.1605  3.4842  13 
   2   1   9 29.5966  3.4486   2 
  -3  -1  -9 148.803   8.984   4 
  -3  -1  -9 121.763   9.902   2 
  -3  -1  -9 147.928   9.909  13 
   3   1   9 148.351  10.286   2 
  -4  -1  -9 235.912  16.116   2 
  -4  -1  -9 216.279  20.460  15 
  -4  -1  -9 226.187  13.953   4 
   4   1   9 268.362  16.467   2 
  -5  -1  -9 49.1129  5.3569  15 
  -5  -1  -9 37.9139  7.9077   1 
   5   1   9 57.2396  4.4222   2 
  -6  -1  -9 54.6507  5.3962  15 
  -6  -1  -9 46.9527  7.2286   1 
   6   1   9 58.3245  4.3046   2 
  -6   2   9 31.5157  2.7149   6 
  -6   2   9 34.8373  2.4867   7 
  -6   2   9 35.4656  2.7088   8 
   5  -2  -9 21.8664  1.9272   4 
  -5   2   9 19.4341  2.3342   8 
  -5   2   9 22.0865  1.9687   7 
  -5   2   9 22.0859  2.2566   6 
   4  -2  -9 56.2562  3.8373   4 
  -4   2   9 58.7242  4.4546   8 
  -4   2   9 53.1111  4.4112   6 
  -4   2   9 48.9530  3.6320   4 
  -4   2   9 55.8622  4.0192   7 
   3  -2  -9 436.558  24.665   4 
  -3   2   9 439.815  26.979   8 
  -3   2   9 433.581  24.535   4 
  -3   2   9 452.309  26.807   7 
   2  -2  -9 280.210  15.399   4 
  -2   2   9 253.044  16.516  10 
  -2   2   9 265.266  16.447   7 
   1  -2  -9 6.78178 1.63286  13 
   1  -2  -9 2.78797 1.11908   4 
  -1   2   9 2.79934 1.33542  10 
   0  -2  -9 17.1913  2.1972   4 
   0  -2  -9 16.6981  2.5131  13 
   0   2   9 21.3539  2.7621   2 
  -1  -2  -9 2.52192 1.41632  13 
  -1  -2  -9 2.48503 1.22871   4 
   1   2   9 1.96835 1.28290   2 
  -2  -2  -9 342.920  19.581   4 
  -2  -2  -9 321.347  21.340  13 
   2   2   9 352.061  22.973   2 
  -3  -2  -9 285.883  19.027  13 
  -3  -2  -9 284.298  16.775  14 
  -3  -2  -9 286.481  20.100   2 
  -3  -2  -9 309.752  17.412   4 
   3   2   9 327.759  20.470   2 
  -4  -2  -9 67.2087  5.2098   2 
  -4  -2  -9 62.5302  4.6400   4 
   4   2   9 63.6447  5.3460   2 
  -5  -2  -9 20.2972  2.8039  15 
  -5  -2  -9 9.75684 3.98727   1 
   5   2   9 15.7595  2.1628   2 
  -6  -2  -9 13.5330  3.1479   1 
  -6  -2  -9 16.1003  2.0528  15 
   6   2   9 13.9877  1.7065   2 
  -6   3   9 28.9539  2.0967   7 
  -6   3   9 29.0028  2.3071   6 
   5  -3  -9 10.0597  1.2513   4 
  -5   3   9 9.33734 1.48366   8 
  -5   3   9 11.6158  1.4981   6 
  -5   3   9 8.60848 1.16791   7 
   4  -3  -9 75.5327  4.8489   4 
  -4   3   9 75.0942  5.1000   7 
  -4   3   9 71.6738  4.7173   4 
  -4   3   9 74.3871  5.4816   8 
   3  -3  -9 32.1381  2.7303   4 
  -3   3   9 35.3726  2.6862   4 
  -3   3   9 31.5348  2.7195   7 
  -3   3   9 34.9747  3.2075   8 
   2  -3  -9 43.8826  3.2358   4 
  -2   3   9 35.8819  3.0374   7 
  -2   3   9 41.4303  3.3264  10 
   1  -3  -9 37.2866  3.4538  13 
   1  -3  -9 38.4330  3.1029   4 
  -1   3   9 35.5099  3.3794  10 
   0  -3  -9 81.5497  5.7660   4 
   0  -3  -9 93.8989  6.5842  13 
  -1  -3  -9 17.3013  2.5886  13 
  -1  -3  -9 18.6990  2.2746   4 
  -2  -3  -9 136.671   9.804  13 
  -2  -3  -9 138.116   8.812   4 
   2   3   9 147.604  10.345   2 
  -3  -3  -9 63.9344  4.6603  14 
  -3  -3  -9 64.8401  4.7044   4 
  -3  -3  -9 67.8493  5.4388  13 
   3   3   9 67.4224  5.4836   2 
   4   3   9 68.9649  5.5544   2 
  -5  -3  -9 8.17226 3.29012   1 
   5   3   9 16.7300  1.9510   2 
   5  -4  -9 20.5099  1.6921   4 
  -5   4   9 19.0537  2.0253   8 
  -5   4   9 21.0817  1.7213   7 
  -5   4   9 23.0497  1.9362   6 
   4  -4  -9 37.0625  2.7256   4 
  -4   4   9 38.6326  2.7707   7 
  -4   4   9 32.1963  3.0543   8 
   3  -4  -9 156.769   9.178   4 
  -3   4   9 166.944  10.187   8 
  -3   4   9 141.679   9.652   7 
   2  -4  -9 296.074  16.338   4 
   2  -4  -9 264.058  17.599  13 
  -2   4   9 292.093  17.514  10 
   1  -4  -9 215.196  12.682   4 
   1  -4  -9 215.371  13.852  13 
  -1   4   9 218.578  13.896  10 
   0  -4  -9 6.40107 1.65378  13 
   0  -4  -9 7.59980 1.43516   4 
  -1  -4  -9 205.004  13.175  13 
  -1  -4  -9 202.138  11.866   4 
   1   4   9 192.563  13.908   2 
  -2  -4  -9 186.451  12.071  13 
  -2  -4  -9 175.651  10.774   4 
   2   4   9 180.289  12.716   2 
  -3  -4  -9 156.813  10.568  13 
  -3  -4  -9 156.535   9.266  14 
   3   4   9 158.677  11.183   2 
   4   4   9 8.02669 1.54276   2 
   5   4   9 1.71504 0.82705   2 
   4  -5  -9 23.0803  1.8368   4 
  -4   5   9 22.9182  2.1243   8 
  -4   5   9 20.1458  1.7198   7 
   3  -5  -9 14.3986  1.6668   4 
  -3   5   9 15.9920  1.9836   8 
   2  -5  -9 54.8216  3.7922   4 
   2  -5  -9 52.1453  4.1433  13 
   1  -5  -9 2.99230 1.03187   4 
   1  -5  -9 4.30316 1.30875  13 
  -1   5   9 2.71002 1.11997  10 
   0  -5  -9 8.91222 1.51054   4 
   0  -5  -9 9.38506 1.85199  13 
   0   5   9 10.4963  1.8401  10 
  -1  -5  -9 4.31129 1.46958  13 
  -1  -5  -9 5.22431 1.22631   4 
  -2  -5  -9 56.2293  4.3634  14 
  -2  -5  -9 62.4169  4.9398  13 
   2   5   9 67.8313  5.1463   2 
  -3  -5  -9 16.1222  2.1935  13 
   3   5   9 20.1778  2.3209   2 
   4   5   9 95.6135  6.8773   2 
   4  -6  -9 121.169   6.985   4 
   3  -6  -9 67.8335  4.8019  13 
   3  -6  -9 69.0677  4.4401   4 
  -3   6   9 76.1346  4.9370   8 
   2  -6  -9 51.3852  4.2562  13 
   2  -6  -9 68.0013  4.0420   4 
   1  -6  -9 13.7516  1.5883   4 
   1  -6  -9 9.84247 1.69314  13 
  -1   6   9 13.0353  1.7255  10 
   0  -6  -9 2.39089 1.15597  13 
   0  -6  -9 2.73194 0.99689   4 
   0   6   9 3.99582 1.22715  10 
  -1  -6  -9 7.60016 1.54850  13 
  -2  -6  -9 45.2510  3.3416  14 
  -2  -6  -9 47.2209  3.7637  13 
   3   6   9 69.4728  5.1401   2 
   2  -7  -9 10.0921  1.1824   4 
   1  -7  -9 53.3548  4.0134  13 
   1  -7  -9 56.2174  3.5923   4 
   0  -7  -9 45.0551  3.5748  13 
   0   7   9 46.9161  3.4994  10 
  -1  -7  -9 56.7594  4.1552  13 
   1   7   9 55.3945  4.1275  10 
   1  14 -10 29.1506  2.6154   6 
  -1 -14  10 36.0439  3.9200  15 
   0  14 -10 1.71260 0.77222   6 
   0  14 -10 1.45028 0.71584  10 
   0 -14  10 1.59960 1.33005  15 
  -1  14 -10 34.4609  3.0761   6 
  -1  14 -10 38.4894  2.7196  10 
   1 -14  10 41.2377  4.2631  15 
   3  13 -10 15.4443  1.5843   6 
  -3 -13  10 18.1480  2.7631  15 
   2  13 -10 19.6198  1.9222   6 
  -2 -13  10 16.3778  2.9941  15 
   1  13 -10 69.7034  5.1724   6 
  -1 -13  10 64.6857  7.0505  15 
   0  13 -10 1.95942 0.96764  10 
   0  13 -10 2.57147 0.98074   6 
   0 -13  10 2.67257 1.66247  15 
  -1  13 -10 63.4674  5.4814   6 
  -1  13 -10 71.1711  5.0352  10 
   1 -13  10 85.2635  7.5429  15 
  -2  13 -10 18.3438  2.2035   6 
  -2  13 -10 21.2148  1.7082  10 
   2 -13  10 18.0182  2.9772  15 
   3 -13  10 18.4874  2.6942  15 
   4  12 -10 16.9930  1.6104   6 
   3  12 -10 6.10659 1.07089   6 
  -3 -12  10 6.80610 2.05565  15 
   2  12 -10 20.3902  2.0542   6 
  -2 -12  10 15.1598  3.2879  15 
   1  12 -10 9.11726 1.58286   6 
  -1 -12  10 11.9034  2.7036  15 
   0  12 -10 116.680   9.139   6 
   0 -12  10 141.866  12.385  15 
  -1  12 -10 27.2124  2.6812  10 
  -1  12 -10 30.3094  3.0831   6 
   1 -12  10 32.1851  4.2300  15 
  -2  12 -10 86.0985  6.1369   6 
  -2  12 -10 81.8179  5.3874  10 
   2 -12  10 63.9036  7.6681  15 
   3 -12  10 16.3175  2.8442  15 
  -4  12 -10 17.6273  1.5609   7 
   4 -12  10 15.1668  2.4032  15 
   4 -12  10 11.7257  2.7925   1 
   4  11 -10 124.222   8.099   6 
  -4 -11  10 108.774   8.300   2 
   3  11 -10 6.12003 1.15360   6 
  -3 -11  10 6.84868 2.38896  15 
   2  11 -10 226.444  14.253   6 
  -2 -11  10 187.058  18.863  15 
   1  11 -10 10.0278  1.6521   6 
  -1 -11  10 10.2618  2.8071  15 
   0  11 -10 137.746  11.067   6 
   0 -11  10 186.391  15.126  15 
  -1  11 -10 2.70714 1.28019   6 
  -1  11 -10 4.79685 1.29767  10 
  -2  11 -10 120.240   9.025   7 
  -2  11 -10 143.163   9.107  10 
  -2  11 -10 144.762  10.064   6 
   2 -11  10 147.357  13.210  15 
  -3  11 -10 23.1637  2.5452   7 
  -4  11 -10 204.363  11.471   7 
   4 -11  10 153.254  19.267   1 
  -5  11 -10 13.3758  1.5092   7 
   5  10 -10 3.06953 0.75768   6 
  -5 -10  10 3.23144 1.06939   2 
  -4 -10  10 68.0152  5.5662   2 
  -3 -10  10 56.6828  6.7094  15 
  -3 -10  10 57.3273  5.0477   2 
   2  10 -10 41.4834  3.4786   6 
  -2 -10  10 36.5447  5.5369  15 
   1  10 -10 356.829  23.333   6 
  -1 -10  10 342.827  30.538  15 
   0  10 -10 4.67640 1.38069   6 
   0 -10  10 8.38738 2.50732  15 
  -1  10 -10 455.442  28.928  10 
  -1  10 -10 493.322  31.491   6 
  -2  10 -10 135.909   9.514   7 
  -2  10 -10 146.228   9.437  10 
  -3  10 -10 121.454   8.732   7 
  -3  10 -10 131.704   8.185  10 
  -4  10 -10 2.03008 1.53402   1 
  -4  10 -10 3.71153 1.22418   7 
  -5  10 -10 28.6728  2.4613   7 
  -5  10 -10 24.9739  3.6843   1 
  -5  -9  10 13.1399  1.3993   8 
  -5  -9  10 12.4427  1.9972   2 
  -4  -9  10 45.6532  3.6440   6 
  -4  -9  10 50.3646  4.4904   2 
  -4  -9  10 44.1088  3.3427   8 
  -3  -9  10 74.6782  5.4752   6 
  -3  -9  10 66.9971  6.1450   2 
  -3  -9  10 74.1904  4.9699   8 
  -2  -9  10 163.459  11.855   2 
  -2  -9  10 157.146  15.110  15 
   1   9 -10 15.8953  2.0352   6 
  -1  -9  10 11.1958  2.9106  15 
   0   9 -10 246.080  16.717   6 
  -1   9 -10 17.1791  2.3375   7 
  -2   9 -10 58.7918  4.4210  10 
  -2   9 -10 49.7094  4.4547   7 
  -3   9 -10 142.095  10.104   7 
  -3   9 -10 151.983   9.506  10 
  -4   9 -10 11.1896  2.7414   1 
  -4   9 -10 11.1257  1.9174   7 
  -5   9 -10 5.56298 1.26235   7 
  -5   9 -10 3.89763 0.91516   4 
  -5   9 -10 3.45352 1.57920   1 
  -6   9 -10 15.7325  1.6490   7 
  -6  -8  10 34.0789  3.0993   2 
  -6  -8  10 35.3614  2.4666   8 
  -5  -8  10 51.6659  3.9015   6 
  -5  -8  10 44.4824  4.4720   2 
  -5  -8  10 53.9759  3.6487   8 
  -4  -8  10 54.3336  4.1302   6 
  -4  -8  10 47.6169  4.8288   2 
  -4  -8  10 52.1809  3.8035   8 
  -3  -8  10 88.7075  5.8379   8 
  -3  -8  10 92.9107  6.4147   6 
  -3  -8  10 73.6494  7.0121   2 
  -2  -8  10 169.537  11.026   6 
  -2  -8  10 143.856  11.647   2 
  -1  -8  10 48.2906  3.8963   6 
  -1  -8  10 45.9724  5.7857  15 
   0   8 -10 230.387  15.089   6 
   0   8 -10 210.925  14.035   7 
  -1   8 -10 45.5655  3.9260   7 
  -2   8 -10 170.862  11.487   7 
  -3   8 -10 23.2446  3.7699  15 
  -3   8 -10 28.4829  2.5746  10 
  -3   8 -10 34.8331  3.5618   7 
  -4   8 -10 46.4309  3.4524   4 
  -4   8 -10 53.4849  4.2537   7 
  -4   8 -10 41.2290  6.0033   1 
  -4   8 -10 42.6313  4.9649  15 
  -5   8 -10 88.3249  5.6279   4 
  -5   8 -10 89.0517 10.2522   1 
  -5   8 -10 86.4774  6.3441   7 
  -6   8 -10 18.3200  1.6433   4 
  -6   8 -10 20.0673  3.0874   1 
  -6   8 -10 20.8468  1.9237   7 
  -6  -7  10 16.9501  2.3107   2 
  -6  -7  10 18.6375  1.5769   8 
  -6  -7  10 17.8092  1.6454   6 
  -5  -7  10 101.915   7.236   6 
  -5  -7  10 94.8073  6.6829   8 
  -5  -7  10 118.032   8.305   2 
  -4  -7  10 38.7391  4.5171   2 
  -4  -7  10 39.8985  3.3135   6 
  -4  -7  10 37.1008  3.0685   8 
  -3  -7  10 114.521   9.745   2 
  -3  -7  10 128.499   8.244   8 
  -3  -7  10 133.246   8.973   6 
  -2  -7  10 2.86960 0.91327   6 
  -2  -7  10 1.43679 1.39096   2 
   1   7 -10 143.715   9.833   7 
  -1  -7  10 163.772  11.306   2 
  -1  -7  10 169.788  10.493   5 
  -1  -7  10 139.705  10.399   6 
  -1   7 -10 154.110  10.316   7 
  -2   7 -10 23.5947  3.6370  15 
  -2   7 -10 17.1128  2.4897   7 
  -3   7 -10 143.976   9.395   4 
  -3   7 -10 157.892  10.681   7 
  -3   7 -10 150.731  14.114  15 
  -3   7 -10 167.783  10.094  10 
  -4   7 -10 59.1768  4.9274   7 
  -4   7 -10 57.9146  7.6426   1 
  -4   7 -10 58.1814  4.3269   4 
  -4   7 -10 59.9208  6.2511  15 
  -5   7 -10 86.3353  6.3235   7 
  -5   7 -10 86.1907  5.6839   4 
  -5   7 -10 85.6542 10.2303   1 
  -5   7 -10 85.5508  8.2461  15 
  -6   7 -10 6.65859 1.11982   4 
  -6   7 -10 7.93316 2.00857   1 
  -6   7 -10 4.63160 1.11064   7 
  -6   7 -10 7.40162 1.60558  15 
  -6  -6  10 5.87804 1.57212   2 
  -6  -6  10 4.26607 0.84948   6 
  -6  -6  10 4.57266 0.86702   8 
  -5  -6  10 24.6393  2.3223   8 
  -5  -6  10 26.0093  2.4198   6 
  -5  -6  10 29.3528  3.7602   2 
  -4  -6  10 101.943   6.526   8 
  -4  -6  10 94.9363  7.9371   2 
  -4  -6  10 88.7954  6.8428   6 
  -3  -6  10 97.4424  8.6782   2 
  -3  -6  10 111.105   7.330   8 
  -3  -6  10 117.546   7.925   6 
   2   6 -10 4.74594 1.19871   7 
  -2  -6  10 5.07869 1.77593   2 
  -2  -6  10 6.78944 1.23228   6 
  -1  -6  10 93.9072  7.4491   2 
  -1  -6  10 91.3906  6.8152   5 
   0  -6  10 197.509  12.909   5 
  -2   6 -10 7.07641 2.05159  15 
  -2   6 -10 8.92212 1.81607   7 
  -3   6 -10 78.1607  5.5953   4 
  -3   6 -10 85.7508  8.2176  15 
  -3   6 -10 81.3872  6.2761   7 
  -4   6 -10 131.705  15.278   1 
  -4   6 -10 128.155   8.458   4 
  -4   6 -10 134.899   9.383   7 
  -4   6 -10 139.507  12.384  15 
  -5   6 -10 8.84987 2.00819  15 
  -5   6 -10 7.43451 1.46914   4 
  -5   6 -10 6.79012 1.60222   7 
  -5   6 -10 6.92033 2.50889   1 
  -6   6 -10 14.7106  3.1880   1 
  -6   6 -10 18.7875  1.9062   4 
  -6   6 -10 21.3739  2.8951  15 
  -6  -5  10 18.3390  1.8199   8 
  -6  -5  10 18.5073  2.6100   2 
  -6  -5  10 23.7428  1.9840   6 
  -5  -5  10 62.3471  5.1289   6 
  -5  -5  10 78.3044  5.0485   8 
  -5  -5  10 68.2038  6.1920   2 
  -4  -5  10 8.45583 2.29691   2 
  -4  -5  10 8.49533 1.43514   6 
  -4  -5  10 9.94367 1.63097   8 
   3   5 -10 31.5433  2.7485   7 
  -3  -5  10 33.0852  2.9107   6 
  -3  -5  10 32.4421  2.8547   8 
  -3  -5  10 29.6866  3.9933   2 
  -3  -5  10 30.7621  2.6171   7 
   2   5 -10 32.2351  2.7713   7 
  -2  -5  10 33.0961  4.0411   2 
  -2  -5  10 29.2281  3.5352   5 
   1   5 -10 55.7810  5.1168   3 
  -1  -5  10 54.5657  4.5629   5 
   0   5 -10 1.75348 1.21920   3 
   0  -5  10 0.16330 0.95706   5 
  -1   5 -10 52.2385  5.0622   3 
   1  -5  10 51.8271  4.2491   5 
  -2   5 -10 14.0208  2.1446   7 
  -2   5 -10 14.0491  2.7218  15 
  -3   5 -10 47.6049  4.2027   7 
  -3   5 -10 45.2565  3.7947   4 
  -3   5 -10 48.5354  5.3191  15 
  -4   5 -10 201.755  18.437  15 
  -4   5 -10 216.393  12.688   4 
  -4   5 -10 212.099  13.844   7 
  -5   5 -10 41.1487  3.5894   7 
  -5   5 -10 35.2004  5.7281   1 
  -5   5 -10 42.7581  4.5815  15 
  -5   5 -10 33.6347  3.3715   4 
  -6   5 -10 8.80527 1.94268  15 
  -6   5 -10 8.64478 2.52619   1 
  -6   5 -10 5.99738 1.24326   4 
  -6  -4  10 3.15179 0.84159   8 
  -6  -4  10 1.85967 0.73700   6 
  -5  -4  10 -0.4117  0.7471   8 
  -5  -4  10 -0.0224  0.6534   6 
  -5  -4  10 1.20570 1.55398   2 
  -4  -4  10 258.610  18.321   6 
  -4  -4  10 284.442  19.582   2 
  -4  -4  10 272.199  17.066   8 
  -4  -4  10 285.129  16.889   7 
  -3  -4  10 67.8550  5.0175   8 
  -3  -4  10 64.7759  4.7920   7 
  -3  -4  10 67.4765  6.2398   2 
  -3  -4  10 76.2333  5.3508   6 
  -2  -4  10 5.76403 1.68820   5 
  -2  -4  10 6.00750 1.88374   2 
   1   4 -10 426.210  31.199   3 
  -1  -4  10 410.621  26.040   5 
   0   4 -10 254.444  19.106   3 
   0  -4  10 244.183  15.954   5 
   1  -4  10 448.738  27.640   5 
   2  -4  10 1.16963 1.02450   5 
   2  -4  10 1.15681 1.32060   2 
  -3   4 -10 65.2101  6.5789  15 
  -3   4 -10 60.1231  4.6836   4 
  -4   4 -10 39.4629  3.9207   7 
  -4   4 -10 46.9707  5.0556  15 
  -4   4 -10 43.4760  3.7158   4 
  -5   4 -10 32.7356  3.2162   4 
  -5   4 -10 28.3464  5.4052   1 
  -5   4 -10 29.8330  3.8165  15 
  -6   4 -10 3.52234 1.44022  15 
  -6   4 -10 2.84926 2.05587   1 
  -6   4 -10 3.98850 1.10470   4 
  -6  -3  10 2.08072 0.77860   8 
  -6  -3  10 3.12029 0.83963   6 
  -5  -3  10 52.3288  4.1988   8 
  -5  -3  10 53.5159  5.2185   2 
  -5  -3  10 56.7365  4.3816   6 
  -5  -3  10 55.8548  3.9064   7 
  -4  -3  10 68.4909  6.3109   2 
  -4  -3  10 63.2473  5.0316   8 
  -4  -3  10 69.0508  4.7687   7 
  -4  -3  10 71.3034  5.2968   6 
  -3  -3  10 73.4419  5.4172   8 
  -3  -3  10 75.6576  5.6669   6 
  -3  -3  10 73.7099  5.1917   7 
  -3  -3  10 78.7871  6.7283   2 
  -2  -3  10 272.156  19.798   2 
  -2  -3  10 292.976  17.669   7 
  -2  -3  10 290.235  18.392   5 
  -1  -3  10 186.056  12.327   5 
   0  -3  10 19.9999  2.5134   5 
   1  -3  10 157.702  10.503   5 
  -2   3 -10 569.991  30.706   4 
   2  -3  10 550.990  36.091   2 
   2  -3  10 521.563  33.306   5 
  -3   3 -10 201.236  11.948   4 
  -3   3 -10 197.522  17.332  15 
   3  -3  10 190.270  13.674   2 
  -4   3 -10 63.5952  6.6083  15 
  -4   3 -10 63.5023  4.8089   4 
  -5   3 -10 58.4250  4.3649   4 
  -5   3 -10 63.7874  6.1652  15 
  -5   3 -10 48.6099  7.8342   1 
  -6   3 -10 21.1922  2.0936   4 
  -6   3 -10 18.6346  2.8233  15 
  -6   3 -10 11.3851  3.3396   1 
  -6  -2  10 11.4712  1.4418   6 
  -6  -2  10 11.5425  1.2289   7 
  -6  -2  10 8.62807 1.32967   8 
  -5  -2  10 30.4169  2.3560   7 
  -5  -2  10 22.2563  2.5976   8 
  -5  -2  10 28.7460  2.6500   6 
  -4  -2  10 63.4622  5.9900   2 
  -4  -2  10 68.3139  5.0908   6 
  -4  -2  10 62.8006  4.5726   7 
  -4  -2  10 64.6817  4.9252   8 
  -3  -2  10 180.434  11.801   7 
  -3  -2  10 192.925  12.021   8 
  -3  -2  10 177.591  13.639   2 
  -3  -2  10 194.557  12.819   6 
  -2  -2  10 487.821  31.511   5 
  -2  -2  10 537.113  30.929   7 
  -2  -2  10 500.860  34.094   2 
  -1  -2  10 270.897  17.181   5 
  -1  -2  10 265.508  18.543   2 
   0  -2  10 40.2673  3.5983   5 
   1  -2  10 284.409  19.230   2 
   1  -2  10 276.656  17.732   5 
  -2   2 -10 258.080  15.331   4 
   2  -2  10 269.508  17.920   2 
   2  -2  10 252.873  16.453   5 
  -3   2 -10 181.623  15.547  15 
  -3   2 -10 169.683  10.730   4 
   3  -2  10 168.856  12.293   2 
  -4   2 -10 186.020  11.261   4 
  -4   2 -10 181.038  16.249  15 
   4  -2  10 181.538  12.826   2 
  -5   2 -10 88.8745 11.4707   1 
  -5   2 -10 91.2188  8.7556  15 
  -5   2 -10 91.9532  6.1567   4 
  -6   2 -10 4.77393 2.40539   1 
  -6   2 -10 4.90336 1.12233   4 
  -6   2 -10 2.69685 1.30792  15 
  -6  -1  10 14.6341  1.3703   7 
  -6  -1  10 12.9090  1.5869   8 
  -6  -1  10 16.1935  1.6085   6 
  -5  -1  10 84.1878  6.1743   6 
  -5  -1  10 79.6970  5.5856   7 
  -5  -1  10 88.2934  5.9735   8 
  -4  -1  10 36.0054  3.2395   8 
  -4  -1  10 34.7034  2.8637   7 
  -4  -1  10 34.7673  3.1685   6 
  -3  -1  10 97.1715  8.1380   2 
  -3  -1  10 98.4369  7.0113   8 
  -3  -1  10 106.065   6.848   7 
   2   1 -10 856.237  46.676   4 
  -2  -1  10 891.100  51.019   7 
  -2  -1  10 801.675  55.692   2 
  -1  -1  10 93.1317  7.9909   2 
  -1  -1  10 117.922   7.636   5 
   0  -1  10 3.06708 1.22499   5 
   0  -1  10 2.63945 1.38089   2 
  -1   1 -10 149.681   8.962   4 
   1  -1  10 130.145   9.449   5 
   1  -1  10 144.705  10.386   2 
  -2   1 -10 1110.69   59.46   4 
  -2   1 -10 1047.07   64.20  13 
   2  -1  10 1082.18   70.09   2 
  -3   1 -10 195.339  11.781   4 
   3  -1  10 189.789  13.540   2 
  -4   1 -10 9.41966 2.22298  15 
  -4   1 -10 10.5513  1.8512   4 
   4  -1  10 11.7664  2.0082   2 
  -5   1 -10 55.7210  8.4731   1 
  -5   1 -10 64.0206  6.3138  15 
   5  -1  10 62.2227  5.0397   2 
  -6   1 -10 5.41556 2.45014   1 
  -6   1 -10 7.68489 1.29202   4 
  -6   1 -10 10.5399  1.9320  15 
  -6   0  10 10.7229  1.3306   6 
  -6   0  10 10.0388  1.3254   8 
  -6   0  10 11.4517  1.1944   7 
  -5   0  10 79.5722  5.1958   7 
  -5   0  10 75.5086  5.4525   8 
  -5   0  10 73.4863  5.6443   6 
  -4   0  10 225.515  15.877   6 
  -4   0  10 243.992  14.719   7 
  -4   0  10 238.538  14.942   8 
   3   0 -10 180.769  10.874   4 
  -3   0  10 196.646  11.831   7 
  -3   0  10 177.601  11.924   8 
   2   0 -10 297.689  16.759   4 
  -2   0  10 271.378  20.067   2 
  -2   0  10 304.665  18.117   7 
   1   0 -10 52.8111  3.7471   4 
  -1   0  10 48.6041  4.0067  10 
  -1   0  10 42.0582  3.5243   7 
  -1   0  10 46.4082  4.4219   2 
   0   0 -10 173.826  10.314   4 
   0   0 -10 153.346  10.772   7 
   0   0  10 179.556  12.147   2 
  -1   0 -10 108.768   7.161   4 
  -1   0 -10 107.250   7.766  13 
   1   0  10 108.171   8.289   2 
  -2   0 -10 206.509  11.682   4 
  -2   0 -10 183.146  12.537  13 
   2   0  10 178.635  13.339   2 
  -3   0 -10 71.8827  5.1060   4 
   3   0  10 64.2438  5.5891   2 
  -4   0 -10 304.641  18.242   4 
   4   0  10 325.467  21.388   2 
  -5   0 -10 129.539   7.472   4 
  -5   0 -10 99.0478 13.7379   1 
  -5   0 -10 114.917  10.669  15 
   5   0  10 126.603   8.620   2 
  -6   0 -10 10.0598  1.8061  15 
  -6   1  10 2.86717 0.68202   6 
  -6   1  10 2.23693 0.71028   8 
  -6   1  10 2.44537 0.57387   7 
  -5   1  10 30.4901  2.7799   6 
  -5   1  10 31.0181  2.7860   8 
  -5   1  10 36.0604  2.6072   7 
   4  -1 -10 193.820  11.089   4 
  -4   1  10 192.277  12.275   8 
  -4   1  10 197.843  12.042   7 
  -4   1  10 180.231  12.955   6 
   3  -1 -10 76.1580  5.1777   4 
  -3   1  10 82.0781  5.4996   7 
  -3   1  10 76.5899  5.7278   8 
   2  -1 -10 36.1771  3.0941   4 
  -2   1  10 39.7092  3.1240   7 
   1  -1 -10 395.512  21.042   4 
  -1   1  10 398.088  22.924  10 
  -1   1  10 341.834  22.416   7 
  -1   1  10 344.520  24.774   2 
   0  -1 -10 832.959  49.746  13 
   0  -1 -10 792.640  45.921   4 
   0   1  10 870.144  54.427   2 
  -1  -1 -10 263.104  16.550   4 
  -1  -1 -10 297.880  18.177  13 
   1   1  10 293.168  19.574   2 
  -2  -1 -10 147.620   9.208   4 
  -2  -1 -10 152.755  10.170  13 
   2   1  10 136.790  10.578   2 
  -3  -1 -10 109.107   7.461   4 
   3   1  10 121.322   8.772   2 
  -4  -1 -10 122.357   7.708   4 
   4   1  10 119.900   8.942   2 
  -5  -1 -10 3.19018 1.32045  15 
   5   1  10 3.90904 1.22687   2 
  -5   2  10 48.5735  3.3188   7 
  -5   2  10 46.1821  3.5205   8 
  -5   2  10 45.2327  3.5730   6 
   4  -2 -10 13.9171  1.6373   4 
  -4   2  10 16.2962  2.0466   8 
  -4   2  10 14.6641  1.6456   7 
   3  -2 -10 122.286   7.772   4 
  -3   2  10 130.494   8.295   7 
  -3   2  10 128.803   8.568   8 
   2  -2 -10 145.030   8.918   4 
  -2   2  10 146.572   9.380   7 
   1  -2 -10 562.561  30.935   4 
  -1   2  10 544.922  33.663  10 
   0  -2 -10 57.1086  4.2809   4 
   0  -2 -10 54.7563  4.6805  13 
   0   2  10 56.9422  5.0229   2 
  -1  -2 -10 595.508  36.348  13 
  -1  -2 -10 598.588  33.429   4 
   1   2  10 598.997  39.455   2 
  -2  -2 -10 51.3287  4.6458  13 
  -2  -2 -10 57.3845  4.1951   4 
   2   2  10 49.4712  4.6575   2 
  -3  -2 -10 116.261   8.670  13 
  -3  -2 -10 129.706   7.894   4 
   3   2  10 124.880   9.201   2 
  -4  -2 -10 16.4779  1.9687   4 
   4   2  10 14.8204  2.1932   2 
   5   2  10 43.8911  3.6885   2 
   5  -3 -10 14.1158  1.3028   4 
  -5   3  10 12.9300  1.2458   7 
  -5   3  10 14.4845  1.5601   8 
   4  -3 -10 23.8177  1.9880   4 
  -4   3  10 21.3421  2.3364   8 
  -4   3  10 24.0045  1.9826   7 
   3  -3 -10 63.4133  4.0999   4 
  -3   3  10 54.7681  4.0886   7 
  -3   3  10 59.3940  4.4735   8 
   2  -3 -10 110.232   6.947   4 
   1  -3 -10 31.9953  2.7092   4 
   1  -3 -10 26.2219  2.9801  13 
  -1   3  10 28.8639  3.0721  10 
   0  -3 -10 198.094  11.807   4 
   0  -3 -10 199.920  12.933  13 
   0   3  10 195.249  12.964  10 
  -1  -3 -10 60.4767  4.2935   4 
  -1  -3 -10 58.1943  4.8238  13 
   1   3  10 53.2968  4.9169   2 
  -2  -3 -10 142.566   8.503   4 
  -2  -3 -10 128.364   9.356  13 
   2   3  10 136.574   9.957   2 
  -3  -3 -10 45.1979  3.5364   4 
   3   3  10 50.8166  4.2889   2 
   4   3  10 1.13873 0.98248   2 
   5   3  10 1.94886 0.81667   2 
   4  -4 -10 39.4703  2.7466   4 
  -4   4  10 43.1430  3.1015   8 
  -4   4  10 38.2233  2.7813   7 
   3  -4 -10 2.89297 0.88513   4 
  -3   4  10 3.75396 1.10845   8 
   2  -4 -10 3.87817 1.06801   4 
   1  -4 -10 105.978   7.338  13 
   1  -4 -10 107.223   6.716   4 
  -1   4  10 105.298   7.272  10 
   0  -4 -10 260.110  15.737   4 
   0  -4 -10 278.394  17.280  13 
   0   4  10 285.767  17.379  10 
  -1  -4 -10 53.3913  4.7004  13 
  -1  -4 -10 66.0892  4.3351   4 
  -2  -4 -10 25.4605  2.4263   4 
  -2  -4 -10 24.9711  2.6007  14 
  -2  -4 -10 24.2060  2.8739  13 
   2   4  10 22.0789  2.7421   2 
   3   4  10 9.26441 1.66260   2 
   4   4  10 68.5376  5.1611   2 
   4  -5 -10 125.312   7.182   4 
   3  -5 -10 14.0646  1.4682   4 
   2  -5 -10 42.8811  3.4611  13 
   2  -5 -10 47.9730  3.2437   4 
   1  -5 -10 37.1938  2.8305   4 
   1  -5 -10 36.3505  3.1390  13 
  -1   5  10 36.2608  2.9724  10 
   0  -5 -10 1.00858 0.83407   4 
   0  -5 -10 1.43845 1.06285  13 
   0   5  10 0.95662 0.95579  10 
  -1  -5 -10 32.5758  2.4859   4 
  -1  -5 -10 25.6876  2.9364  13 
  -2  -5 -10 31.8869  2.9179  13 
   2   5  10 32.8840  2.9851   2 
   3   5  10 11.6777  1.5945   2 
   2  -6 -10 2.98858 0.76933   4 
   1  -6 -10 34.4779  2.8356  13 
   1  -6 -10 36.0615  2.5686   4 
   0  -6 -10 8.30964 1.17992   4 
   0  -6 -10 8.76301 1.42907  13 
   0   6  10 8.24106 1.28296  10 
  -1  -6 -10 34.0671  2.9531  13 
   1   6  10 38.9840  3.0390  10 
   0  14 -11 10.4940  1.3690   6 
   0 -14  11 15.4033  2.2976  15 
   2  13 -11 9.40538 1.29497   6 
  -2 -13  11 8.91987 2.13232  15 
   1  13 -11 61.1682  4.7018   6 
  -1 -13  11 63.2687  6.5274  15 
   0  13 -11 3.53706 1.02366  10 
   0  13 -11 3.69958 1.05087   6 
   0 -13  11 6.91563 2.00770  15 
  -1  13 -11 52.3202  4.4761   6 
  -1  13 -11 57.3389  4.0861  10 
   1 -13  11 66.5249  6.2067  15 
   2 -13  11 13.9100  2.4581  15 
   3  12 -11 28.4142  2.3825   6 
  -3 -12  11 25.4354  3.7302  15 
   2  12 -11 31.0968  2.6030   6 
  -2 -12  11 23.6049  3.8464  15 
   1  12 -11 17.5204  2.0375   6 
  -1 -12  11 11.8854  2.8200  15 
   0  12 -11 7.59117 1.52743   6 
   0 -12  11 7.73959 2.26379  15 
  -1  12 -11 18.6679  2.1728  10 
  -1  12 -11 24.5088  2.6491   6 
   1 -12  11 20.2632  3.3963  15 
  -2  12 -11 16.2589  1.7144  10 
   2 -12  11 13.7705  2.7459  15 
  -3  12 -11 24.6554  2.0166   7 
   3 -12  11 18.4763  3.0736  15 
   4  11 -11 93.5563  5.9866   6 
  -4 -11  11 74.5873  6.0837   2 
   3  11 -11 14.6419  1.6638   6 
  -3 -11  11 9.89268 2.49957  15 
   2  11 -11 40.1930  3.1906   6 
  -2 -11  11 29.7724  4.7356  15 
   1  11 -11 13.3982  1.8241   6 
  -1 -11  11 12.5540  2.9715  15 
   0  11 -11 6.13002 1.44014   6 
   0 -11  11 9.58675 2.60778  15 
  -1  11 -11 10.6232  1.7389  10 
  -1  11 -11 10.8563  1.8991   6 
   1 -11  11 13.7627  2.8682  15 
  -2  11 -11 88.3663  5.7288  10 
  -2  11 -11 78.2114  5.7487   7 
   2 -11  11 77.3482  8.3329  15 
  -3  11 -11 96.6029  6.6405   7 
  -4  11 -11 71.3737  4.6065   7 
   4 -11  11 56.3223  6.2645  15 
   5  10 -11 48.3242  3.5325   6 
   4  10 -11 29.1715  2.4579   6 
  -4 -10  11 25.6329  2.9797   2 
   3  10 -11 159.298  10.401   6 
  -3 -10  11 138.781  10.811   2 
  -2 -10  11 149.953  14.134  15 
   1  10 -11 24.6374  2.5096   6 
  -1 -10  11 22.5622  3.9967  15 
   0  10 -11 1.21497 1.05219   6 
   0 -10  11 1.88733 1.71613  15 
  -1  10 -11 11.4091  1.9193  10 
  -1  10 -11 16.0582  2.0751   7 
   1 -10  11 19.8870  3.5455  15 
  -2  10 -11 160.268  10.554   7 
  -2  10 -11 157.108  10.334  10 
  -3  10 -11 39.8903  3.5287   7 
  -4  10 -11 126.176   8.469   7 
  -5  10 -11 12.4032  1.4799   7 
  -5  -9  11 7.13032 1.45721   2 
  -5  -9  11 7.18439 0.89156   8 
  -4  -9  11 3.02610 0.74283   8 
  -4  -9  11 6.05602 1.62244   2 
  -3  -9  11 65.0677  4.8243   6 
  -3  -9  11 60.2686  5.5254   2 
  -2  -9  11 39.8319  4.1300   2 
   1   9 -11 69.8806  5.1741   6 
  -1  -9  11 57.9522  7.0662  15 
   0   9 -11 4.25502 1.27286   7 
   0   9 -11 3.76463 1.22355   6 
   0  -9  11 7.04497 2.40387  15 
  -1   9 -11 88.1830  6.4051   7 
  -2   9 -11 154.231  10.429   7 
  -2   9 -11 153.821  10.144  10 
  -3   9 -11 19.5347  1.9200  10 
  -3   9 -11 22.1620  2.7172   7 
  -4   9 -11 137.769   9.348   7 
  -5   9 -11 4.92782 1.55598   1 
  -5   9 -11 5.31891 0.87784   4 
  -5   9 -11 6.25339 1.21853   7 
  -5  -8  11 1.62373 1.12281   2 
  -5  -8  11 -0.0344  0.4643   8 
  -5  -8  11 -0.0337  0.4567   6 
  -4  -8  11 153.919   9.741   8 
  -4  -8  11 158.317  10.664   6 
  -4  -8  11 155.058  11.483   2 
  -3  -8  11 73.8570  6.4450   2 
  -3  -8  11 74.8167  5.5551   6 
  -2  -8  11 72.5368  6.4020   2 
  -2  -8  11 74.8548  5.5687   6 
  -1  -8  11 155.079  11.510   2 
   0   8 -11 9.79478 1.70799   7 
  -1   8 -11 93.5869  6.7996   7 
  -2   8 -11 80.5513  6.1411   7 
  -3   8 -11 162.739  10.813   7 
  -3   8 -11 154.841  10.048  10 
  -4   8 -11 72.0343  5.1936   7 
  -4   8 -11 57.5910  4.2562   4 
  -5   8 -11 7.02003 1.16019   4 
  -5   8 -11 6.60619 1.34223   7 
  -5   8 -11 7.15985 1.97548   1 
  -6  -7  11 1.63977 0.51834   6 
  -5  -7  11 0.19369 0.53125   8 
  -5  -7  11 -0.5294  1.0725   2 
  -5  -7  11 0.78409 0.56820   6 
  -4  -7  11 96.4373  6.7136   6 
  -4  -7  11 101.365   6.234   8 
  -4  -7  11 75.7063  7.3560   2 
  -3  -7  11 167.505  11.645   6 
  -3  -7  11 174.303  12.682   2 
  -2  -7  11 28.1266  3.8587   2 
  -2  -7  11 33.3171  2.9065   6 
   1   7 -11 613.010  36.455   7 
  -1  -7  11 555.371  39.026   6 
  -1  -7  11 644.774  40.056   2 
   0   7 -11 28.3436  3.1591   7 
   0  -7  11 38.0990  3.7858   2 
  -1   7 -11 659.306  40.160   7 
  -2   7 -11 7.78909 2.13667  15 
  -2   7 -11 9.62129 1.90398   7 
  -3   7 -11 327.540  20.382  10 
  -3   7 -11 340.824  21.203   7 
  -3   7 -11 310.567  18.973   4 
  -3   7 -11 358.688  28.778  15 
  -4   7 -11 49.0867  4.1067   7 
  -4   7 -11 42.2858  4.9676  15 
  -4   7 -11 45.5332  3.5137   4 
  -5   7 -11 18.0869  2.2875   7 
  -5   7 -11 20.2074  3.4508   1 
  -5   7 -11 21.5070  2.1257   4 
  -5   7 -11 17.7769  2.7915  15 
  -6   7 -11 15.5135  1.5168   4 
  -6  -6  11 16.5921  1.4605   8 
  -6  -6  11 17.5181  1.5650   6 
  -6  -6  11 17.5752  2.1640   2 
  -5  -6  11 36.6553  3.7890   2 
  -5  -6  11 37.8942  3.0069   6 
  -5  -6  11 34.1641  2.7961   8 
  -4  -6  11 24.9380  3.5060   2 
  -4  -6  11 27.3991  2.4729   6 
  -4  -6  11 24.6775  2.3282   8 
  -3  -6  11 296.958  20.010   6 
  -3  -6  11 308.309  21.135   2 
   2   6 -11 460.628  27.869   7 
  -2  -6  11 443.379  30.857   2 
  -2  -6  11 464.665  29.936   6 
   1   6 -11 40.6823  3.4239   7 
  -1  -6  11 37.8866  4.4672   2 
   0   6 -11 1.26344 1.04987   7 
   0  -6  11 3.66804 1.69438   2 
  -1   6 -11 13.5916  2.1222   7 
  -2   6 -11 391.486  24.923   7 
  -2   6 -11 406.040  34.006  15 
  -3   6 -11 162.879  10.552   4 
  -3   6 -11 180.517  15.748  15 
  -3   6 -11 181.214  11.828   7 
  -4   6 -11 58.5178  4.3012   4 
  -4   6 -11 55.4503  5.9564  15 
  -4   6 -11 55.8681  4.7055   7 
  -5   6 -11 71.9962  5.1761   7 
  -5   6 -11 67.0640  6.7663  15 
  -5   6 -11 71.5551  4.7741   4 
  -5   6 -11 65.4288  8.2742   1 
  -6   6 -11 12.1779  1.4128   4 
  -6   6 -11 11.7347  1.9658  15 
  -6  -5  11 5.60499 1.35791   2 
  -6  -5  11 6.04510 0.90570   6 
  -6  -5  11 4.12943 0.80803   8 
  -5  -5  11 42.9495  4.2811   2 
  -5  -5  11 38.6145  3.2056   8 
  -5  -5  11 45.3229  3.4354   6 
  -4  -5  11 37.8404  4.4428   2 
  -4  -5  11 35.0724  3.0220   6 
  -4  -5  11 33.0948  2.9019   8 
   3   5 -11 57.0255  4.3297   7 
  -3  -5  11 58.2794  4.5835   6 
  -3  -5  11 65.1383  5.7650   2 
   2   5 -11 178.426  11.345   7 
  -2  -5  11 176.968  12.027   6 
  -2  -5  11 170.771  12.968   2 
   1   5 -11 7.59567 1.50171   7 
  -1  -5  11 6.93151 1.92430   2 
   0   5 -11 158.083  11.157   7 
   0  -5  11 185.007  12.527   2 
  -1   5 -11 22.7933  2.6594   7 
   1  -5  11 14.3011  2.4866   2 
  -2   5 -11 353.539  21.949   4 
  -2   5 -11 410.902  24.339   7 
  -2   5 -11 401.118  33.050  15 
  -3   5 -11 47.8362  4.0303   7 
  -3   5 -11 42.4355  3.5959   4 
  -3   5 -11 39.3653  4.8235  15 
  -4   5 -11 38.5775  4.2724  15 
  -4   5 -11 30.7927  3.1940   4 
  -4   5 -11 31.7943  3.4666   7 
  -5   5 -11 19.9003  2.2460   4 
  -5   5 -11 17.4716  2.8584  15 
  -6   5 -11 6.00277 1.07237   4 
  -6   5 -11 6.40220 1.90182   1 
  -6   5 -11 7.97058 1.68575  15 
  -6  -4  11 4.40012 0.83100   8 
  -6  -4  11 4.89590 0.83783   6 
  -5  -4  11 10.6059  2.2850   2 
  -5  -4  11 15.0660  1.7550   8 
  -5  -4  11 12.9091  1.6216   6 
   4   4 -11 23.9919  2.2289   7 
  -4  -4  11 18.2203  2.2707   8 
  -4  -4  11 25.8885  2.3752   6 
  -4  -4  11 28.9842  3.8026   2 
  -4  -4  11 24.6383  2.1143   7 
   3   4 -11 56.6098  4.0029   7 
  -3  -4  11 52.5040  3.8117   7 
  -3  -4  11 47.6422  4.0583   6 
  -3  -4  11 47.1278  5.0029   2 
   2   4 -11 167.127  10.427   7 
  -2  -4  11 148.979  11.837   2 
   1   4 -11 224.435  14.120   7 
  -1  -4  11 216.043  15.690   2 
   0   4 -11 31.8786  2.9972   7 
   0  -4  11 28.6905  3.6312   2 
  -1   4 -11 153.547  10.003   4 
  -1   4 -11 159.846  11.011   7 
   1  -4  11 186.944  12.192   2 
  -2   4 -11 204.346  12.292   4 
  -2   4 -11 225.293  13.543   7 
   2  -4  11 187.141  14.299   2 
  -3   4 -11 153.842  13.098  15 
  -3   4 -11 132.783   8.981   4 
  -3   4 -11 138.975   9.763   7 
  -4   4 -11 5.33559 1.69709  15 
  -4   4 -11 3.73888 1.29449   4 
  -5   4 -11 32.5151  2.8143   4 
  -5   4 -11 28.0564  3.6413  15 
  -6   4 -11 2.73803 0.89637   4 
  -6   4 -11 3.04400 1.23909  15 
  -6  -3  11 15.1674  1.5064   8 
  -6  -3  11 13.1910  1.3877   6 
  -5  -3  11 46.8706  3.8057   6 
  -5  -3  11 47.0242  3.6761   8 
  -5  -3  11 51.5120  3.4870   7 
  -4  -3  11 27.8576  2.2820   7 
  -4  -3  11 27.9152  2.5277   8 
  -4  -3  11 22.6684  2.3960   6 
  -4  -3  11 23.3139  3.5149   2 
  -3  -3  11 213.386  14.233   6 
  -3  -3  11 198.852  13.158   7 
  -3  -3  11 223.020  15.345   2 
  -2  -3  11 472.306  27.225   7 
  -2  -3  11 415.847  30.099   2 
   1   3 -11 256.113  15.997   7 
  -1  -3  11 247.635  17.672   2 
   0   3 -11 171.498  11.386   7 
   0   3 -11 158.334  10.388   4 
   0  -3  11 193.875  12.763   2 
  -1   3 -11 281.780  18.357   7 
  -1   3 -11 284.656  16.895   4 
   1  -3  11 307.482  20.099   2 
  -2   3 -11 343.889  19.900   4 
  -2   3 -11 371.245  21.699   7 
   2  -3  11 320.165  23.254   2 
  -3   3 -11 117.510   7.554   4 
  -3   3 -11 118.785  10.630  15 
   3  -3  11 104.676   8.454   2 
  -4   3 -11 40.7696  4.6720  15 
  -4   3 -11 42.1904  3.5684   4 
  -5   3 -11 47.5454  3.6718   4 
  -5   3 -11 45.9355  4.9912  15 
  -6   3 -11 26.5874  2.2339   4 
  -6   3 -11 30.2840  3.2799  15 
   6   2 -11 8.08575 0.99190   7 
  -6  -2  11 6.90904 0.99164   6 
  -6  -2  11 7.30854 1.03399   8 
  -5  -2  11 21.7090  2.0866   6 
  -5  -2  11 22.1476  2.2510   8 
  -5  -2  11 20.7712  1.8745   7 
  -4  -2  11 4.58615 0.98871   7 
  -4  -2  11 6.94826 1.38413   8 
  -4  -2  11 6.48730 1.99011   2 
  -4  -2  11 5.23636 1.13737   6 
  -3  -2  11 124.555  10.086   2 
  -3  -2  11 137.176   8.656   7 
  -2  -2  11 131.697   8.385   7 
  -2  -2  11 118.627   9.683   2 
   1   2 -11 75.8538  5.1641   4 
   1   2 -11 78.2989  5.5525   7 
  -1  -2  11 74.1324  6.3471   2 
  -1  -2  11 70.7882  5.2766   7 
   0   2 -11 84.1893  5.8443   4 
   0   2 -11 80.6627  6.1605   7 
   0  -2  11 94.6477  7.1300   2 
  -1   2 -11 69.5846  5.4701   7 
  -1   2 -11 75.0822  5.3389   4 
   1  -2  11 75.9284  6.2176   2 
  -2   2 -11 241.367  14.024   4 
   2  -2  11 225.913  16.244   2 
  -3   2 -11 190.947  11.756   4 
   3  -2  11 193.192  13.588   2 
  -4   2 -11 5.97106 1.56639   4 
  -4   2 -11 8.64249 2.00336  15 
   4  -2  11 7.16002 1.65475   2 
  -5   2 -11 66.0752  4.5361   4 
  -5   2 -11 61.8952  6.2747  15 
  -6   2 -11 14.7772  1.5878   4 
  -6   2 -11 19.0446  2.2716  15 
  -6  -1  11 15.6532  1.3062   7 
  -6  -1  11 15.9996  1.4578   6 
  -5  -1  11 48.1447  3.6852   7 
  -5  -1  11 55.9292  4.0829   6 
  -5  -1  11 57.1005  3.9750   8 
  -4  -1  11 38.2999  3.0722   6 
  -4  -1  11 35.1780  2.8006   7 
  -4  -1  11 30.0530  2.9425   8 
  -3  -1  11 30.9952  3.9034   2 
  -3  -1  11 35.4470  2.8568   7 
   2   1 -11 74.3140  4.8086   4 
  -2  -1  11 67.1859  4.9798   7 
  -2  -1  11 67.1477  6.0593   2 
   1   1 -11 575.693  32.484   4 
   1   1 -11 630.219  35.502   7 
  -1  -1  11 573.111  38.669   2 
  -1  -1  11 554.354  35.186   7 
   0   1 -11 73.4978  5.8234   7 
   0   1 -11 84.0176  5.7389   4 
   0  -1  11 91.3600  6.8846   2 
  -1   1 -11 608.995  34.555   4 
   1  -1  11 623.601  40.793   2 
  -2   1 -11 41.5165  3.7550   4 
   2  -1  11 29.6481  3.7039   2 
  -3   1 -11 18.4463  2.4300   4 
   3  -1  11 14.5491  2.3730   2 
  -4   1 -11 27.9938  2.8447   4 
   4  -1  11 27.0978  3.1254   2 
  -5   1 -11 26.6491  3.2378  15 
  -5   1 -11 28.9794  2.6698   4 
   5  -1  11 28.2730  2.8291   2 
  -5   0  11 8.06812 1.28457   8 
  -5   0  11 8.58613 1.21274   6 
  -5   0  11 9.52028 1.16060   7 
  -4   0  11 29.7639  2.6545   8 
  -4   0  11 27.6250  2.3763   7 
   3   0 -11 206.977  12.148   4 
  -3   0  11 212.222  13.187   7 
   2   0 -11 41.9320  3.4421   4 
  -2   0  11 43.6145  4.4289   2 
  -2   0  11 49.8176  3.6114   7 
   1   0 -11 26.9321  2.6931   4 
   1   0 -11 25.0866  2.5868   7 
  -1   0  11 22.5807  2.2378   7 
  -1   0  11 20.1078  2.9835   2 
   0   0 -11 229.505  13.299   4 
   0   0 -11 201.646  13.958   7 
   0   0  11 238.906  15.727   2 
  -1   0 -11 21.5661  2.6231   4 
  -1   0 -11 21.1753  2.8889  13 
   1   0  11 22.2660  3.0644   2 
  -2   0 -11 25.5747  3.2231  13 
  -2   0 -11 22.8120  2.7972   4 
   2   0  11 30.3866  3.4349   2 
  -3   0 -11 216.967  13.169   4 
   3   0  11 224.059  15.428   2 
  -4   0 -11 124.496   7.664   4 
   4   0  11 117.667   8.860   2 
  -5   0 -11 29.8646  2.3914   4 
   5   0  11 27.4197  2.7432   2 
  -5   1  11 15.4003  1.5809   8 
  -5   1  11 13.3558  1.3676   7 
  -5   1  11 11.7738  1.3538   6 
   4  -1 -11 167.793   9.835   4 
  -4   1  11 164.005  10.670   7 
  -4   1  11 180.941  10.864   8 
   3  -1 -11 19.2025  2.0268   4 
  -3   1  11 19.6688  1.9142   7 
   2  -1 -11 20.9929  2.3084   4 
  -2   1  11 21.7456  2.0796   7 
   1  -1 -11 115.248   7.362   4 
   1  -1 -11 113.731   7.637   7 
   0  -1 -11 147.058   9.387   4 
   0   1  11 167.311  11.212   2 
   0   1  11 139.291  10.170  10 
  -1  -1 -11 111.290   7.613   4 
  -1  -1 -11 115.725   8.302  13 
   1   1  11 124.867   9.020   2 
  -2  -1 -11 38.3709  3.8510  13 
  -2  -1 -11 28.3819  3.0188   4 
   2   1  11 28.5295  3.4164   2 
  -3  -1 -11 25.4582  2.6032   4 
   3   1  11 24.4716  3.0162   2 
  -4  -1 -11 92.0135  5.8666   4 
   4   1  11 90.7941  6.9221   2 
   5   1  11 2.94984 1.00366   2 
  -5   2  11 17.8971  1.4555   7 
  -4   2  11 6.23596 1.15592   8 
  -4   2  11 6.16429 0.94823   7 
   3  -2 -11 73.0027  4.7875   4 
  -3   2  11 73.8407  4.9894   7 
   2  -2 -11 38.4494  2.9408   4 
  -2   2  11 33.0595  2.7467   7 
   1  -2 -11 50.8809  3.8662   4 
   0  -2 -11 171.400  10.383   4 
   0  -2 -11 170.024  11.231  13 
   0   2  11 159.011  11.236  10 
   0   2  11 181.796  12.287   2 
  -1  -2 -11 76.8345  5.8538  13 
  -1  -2 -11 78.3004  5.3417   4 
   1   2  11 72.5972  6.1487   2 
  -2  -2 -11 31.8386  2.9319   4 
  -2  -2 -11 30.5281  3.3901  13 
   2   2  11 26.5767  3.2380   2 
  -3  -2 -11 71.6842  4.9614   4 
   3   2  11 78.0921  5.9868   2 
  -4  -2 -11 21.6810  1.9335   4 
   4   2  11 23.4047  2.4307   2 
   4  -3 -11 5.24687 0.85415   4 
  -4   3  11 4.23442 0.71030   7 
   3  -3 -11 2.60431 0.84675   4 
  -3   3  11 3.28932 0.71549   7 
   2  -3 -11 30.2866  2.5305   4 
   1  -3 -11 32.5498  2.7768   4 
   0  -3 -11 25.1895  2.5715   4 
   0  -3 -11 27.2936  2.9171  13 
   0   3  11 26.1241  2.8918  10 
  -1  -3 -11 23.9792  2.8429  13 
  -2  -3 -11 55.8115  3.9111   4 
  -2  -3 -11 54.1008  4.3964  13 
   2   3  11 54.4937  4.6167   2 
  -3  -3 -11 32.8659  2.5175   4 
   3   3  11 32.0785  3.0757   2 
   4   3  11 4.12798 1.05353   2 
   3  -4 -11 66.5804  4.1822   4 
   2  -4 -11 90.2004  5.5972   4 
   1  -4 -11 190.919  12.447  13 
   1  -4 -11 207.640  11.575   4 
   0  -4 -11 29.1991  2.7152  13 
   0  -4 -11 29.3929  2.4242   4 
   0   4  11 26.6971  2.7828  10 
  -1  -4 -11 215.580  12.413   4 
  -1  -4 -11 203.530  13.536  13 
   1   4  11 228.445  13.748  10 
  -2  -4 -11 55.4864  3.6764   4 
  -2  -4 -11 59.0504  4.2586  13 
   2   4  11 52.9975  4.3999   2 
   3   4  11 48.1508  3.8149   2 
   2  -5 -11 41.4084  2.7984   4 
   1  -5 -11 28.4702  2.1943   4 
   0  -5 -11 5.53636 1.01386   4 
  -1  -5 -11 28.7410  2.2400   4 
   1   5  11 34.4893  2.6905  10 
   2  13 -12 48.3267  3.6130   6 
   1  13 -12 10.0334  1.3422   6 
  -1 -13  12 10.7228  2.1786  15 
   0  13 -12 0.00496 0.67245  10 
   0  13 -12 1.81225 0.81328   6 
   0 -13  12 3.33258 1.41725  15 
  -1  13 -12 7.68903 1.05014  10 
  -1  13 -12 4.37117 1.02634   6 
   1 -13  12 7.90436 1.75691  15 
   2 -13  12 47.4433  4.8596  15 
   3  12 -12 42.3409  3.2291   6 
   2  12 -12 4.99191 0.96209   6 
  -2 -12  12 3.30490 1.58721  15 
   1  12 -12 10.3075  1.4700   6 
  -1 -12  12 7.79768 2.21471  15 
   0  12 -12 37.9633  3.3170  10 
   0  12 -12 40.3581  3.5912   6 
   0 -12  12 55.9417  5.3224  15 
  -1  12 -12 9.42960 1.38363  10 
   1 -12  12 9.81112 2.28417  15 
  -2  12 -12 21.9352  1.7152  10 
   2 -12  12 15.3159  2.8397  15 
   3 -12  12 52.6958  5.3231  15 
   3  11 -12 63.0382  4.6372   6 
   2  11 -12 10.2606  1.4725   6 
  -2 -11  12 12.6385  2.7013  15 
   1  11 -12 71.4238  5.1472   6 
  -1 -11  12 59.2948  6.9367  15 
   0  11 -12 40.1082  3.8118   6 
   0 -11  12 53.5050  5.5925  15 
  -1  11 -12 77.9892  5.7672  10 
   1 -11  12 89.4106  8.5471  15 
  -2  11 -12 4.62062 1.02149  10 
  -2  11 -12 3.66078 1.10449   7 
   2 -11  12 3.79765 1.72874  15 
  -3  11 -12 38.6558  3.0820   7 
   3 -11  12 37.5954  4.4142  15 
  -4  11 -12 81.8205  4.9907   7 
   4 -11  12 64.3869  6.8161  15 
   4  10 -12 18.6785  1.7512   6 
  -4 -10  12 18.0183  2.2213   2 
   3  10 -12 4.22610 0.92158   6 
  -3 -10  12 2.44313 1.29441   2 
   2  10 -12 152.987  10.548   6 
   1  10 -12 125.712   8.154   6 
  -1 -10  12 96.8958 10.6850  15 
   0  10 -12 250.850  17.985   6 
   0 -10  12 288.214  23.726  15 
  -1  10 -12 101.896   7.523  10 
  -1  10 -12 105.173   7.559   7 
   1 -10  12 132.575  11.192  15 
  -2  10 -12 212.398  12.823  10 
  -2  10 -12 192.520  13.009   7 
  -3  10 -12 3.73406 1.16476   7 
  -4  10 -12 51.1979  3.8844   7 
  -4  -9  12 80.9241  6.3284   2 
  -3  -9  12 3.68191 1.52886   2 
  -2  -9  12 41.2954  4.1995   2 
   1   9 -12 107.342   7.776   6 
   0   9 -12 1.20436 0.96816   7 
   0  -9  12 1.92871 1.83174  15 
  -1   9 -12 82.5182  6.0558   7 
  -2   9 -12 14.4859  1.9905  10 
  -2   9 -12 19.5872  2.4365   7 
  -3   9 -12 16.3070  2.2387   7 
  -4   9 -12 46.3975  3.7823   7 
  -5   9 -12 70.6264  4.8311   7 
  -5  -8  12 12.2714  1.8158   2 
  -4  -8  12 39.6014  3.9911   2 
  -4  -8  12 43.3177  3.3210   6 
  -3  -8  12 17.4107  1.9181   6 
  -3  -8  12 12.7706  2.4564   2 
  -2  -8  12 163.238  11.537   2 
  -2  -8  12 147.255  10.515   6 
   1   8 -12 120.865   8.499   7 
  -1  -8  12 137.453   9.881   2 
   0   8 -12 7.93708 1.59475   7 
   0  -8  12 10.1923  2.6472  15 
  -1   8 -12 173.239  11.515   7 
  -2   8 -12 175.100  11.703   7 
  -3   8 -12 21.0741  1.8943  10 
  -3   8 -12 19.6928  2.5818   7 
  -4   8 -12 92.4846  6.6931   7 
  -4   8 -12 95.6600  5.8528   4 
  -5   8 -12 58.6678  4.0807   7 
  -5   8 -12 52.7145  3.5431   4 
  -5  -7  12 132.407   9.014   6 
  -5  -7  12 129.793   8.243   8 
  -5  -7  12 142.116   9.684   2 
  -4  -7  12 13.3075  1.6140   6 
  -4  -7  12 13.6458  1.4623   8 
  -4  -7  12 13.7638  2.3363   2 
  -3  -7  12 20.9543  2.0991   6 
  -3  -7  12 22.5996  3.2255   2 
   2   7 -12 10.9416  1.6228   7 
  -2  -7  12 11.4738  2.4488   2 
  -2  -7  12 11.0306  1.5558   6 
   1   7 -12 33.1258  3.0252   7 
  -1  -7  12 33.6435  4.0726   2 
   0   7 -12 758.480  52.428   7 
   0  -7  12 997.150  57.316   2 
  -1   7 -12 69.8539  5.4631   7 
  -2   7 -12 19.3209  2.5930   7 
  -3   7 -12 17.6245  1.8856  10 
  -3   7 -12 16.9617  2.0981   4 
  -3   7 -12 21.6996  2.7080   7 
  -4   7 -12 10.4227  1.5305   4 
  -4   7 -12 8.49545 1.90335  15 
  -4   7 -12 6.17297 1.50444   7 
  -5   7 -12 53.0083  3.7030   4 
  -5   7 -12 58.3283  4.1376   7 
  -5  -6  12 8.98454 1.78164   2 
  -5  -6  12 8.94756 1.14643   6 
  -5  -6  12 8.20112 1.07945   8 
  -4  -6  12 13.1728  1.6301   6 
  -4  -6  12 15.9359  2.6298   2 
   3   6 -12 5.26877 1.15172   7 
  -3  -6  12 6.84436 2.00805   2 
  -3  -6  12 5.28373 1.08429   6 
   2   6 -12 9.29826 1.51689   7 
  -2  -6  12 8.56032 2.11840   2 
  -2  -6  12 6.87558 1.32012   6 
   1   6 -12 271.383  16.752   7 
  -1  -6  12 256.599  18.571   2 
   0   6 -12 256.721  17.199   7 
   0  -6  12 287.553  19.013   2 
  -1   6 -12 190.427  12.633   7 
  -2   6 -12 4.07627 1.43145   7 
  -3   6 -12 7.93448 2.08621  15 
  -3   6 -12 8.25113 1.72369   7 
  -3   6 -12 8.91168 1.59555   4 
  -4   6 -12 0.82942 0.95910   4 
  -4   6 -12 3.28605 1.28444   7 
  -4   6 -12 1.67578 1.22534  15 
  -5   6 -12 66.7362  4.6796   7 
  -5   6 -12 69.0059  6.3846  15 
  -5   6 -12 60.2300  4.3247   4 
  -5  -5  12 72.5832  5.1736   6 
  -5  -5  12 74.0526  4.8185   8 
  -5  -5  12 70.0152  5.7890   2 
   4   5 -12 7.44926 1.22987   7 
  -4  -5  12 7.66002 1.22610   6 
  -4  -5  12 8.80721 2.11371   2 
  -4  -5  12 6.02567 1.13956   8 
   3   5 -12 4.30829 1.09174   7 
  -3  -5  12 5.45100 1.06495   6 
  -3  -5  12 6.42801 1.98983   2 
   2   5 -12 0.95938 0.88051   7 
  -2  -5  12 1.02290 1.39778   2 
   1   5 -12 434.167  26.111   7 
  -1  -5  12 410.261  28.661   2 
   0   5 -12 46.0442  4.1907   7 
   0  -5  12 58.4492  5.0539   2 
  -1   5 -12 442.231  27.985   7 
   1  -5  12 461.263  30.323   2 
  -2   5 -12 9.78450 1.75828   4 
  -2   5 -12 7.91267 1.73007   7 
   2  -5  12 6.45553 1.77891   2 
  -3   5 -12 19.4221  3.0462  15 
  -3   5 -12 18.2275  2.4932   7 
  -3   5 -12 12.3595  2.0317   4 
  -4   5 -12 12.6889  1.9274   7 
  -4   5 -12 10.2029  1.7065   4 
  -4   5 -12 8.49305 2.04422  15 
  -5   5 -12 54.8143  3.8955   4 
  -5   5 -12 56.3160  5.5623  15 
  -5  -4  12 2.31807 0.68946   6 
  -5  -4  12 1.70776 1.24873   2 
  -5  -4  12 1.61717 0.73568   8 
   4   4 -12 8.57423 1.26826   7 
  -4  -4  12 5.81437 1.89670   2 
  -4  -4  12 5.53465 1.06211   6 
   3   4 -12 14.4485  1.7927   7 
  -3  -4  12 13.4021  1.6937   6 
  -3  -4  12 11.1088  2.4477   2 
   2   4 -12 159.104  10.345   7 
  -2  -4  12 155.939  11.833   2 
   1   4 -12 205.166  12.632   7 
  -1  -4  12 179.506  13.956   2 
   0   4 -12 149.104  10.935   7 
   0  -4  12 186.300  12.386   2 
  -1   4 -12 195.589  12.850   4 
  -1   4 -12 226.750  14.302   7 
   1  -4  12 237.124  15.609   2 
  -2   4 -12 189.606  10.586   4 
  -2   4 -12 178.738  11.445   7 
   2  -4  12 146.701  12.076   2 
  -3   4 -12 5.03579 1.51663   7 
  -3   4 -12 4.78489 1.46885   4 
  -4   4 -12 76.8266  7.4985  15 
  -4   4 -12 79.4335  5.4365   4 
  -5   4 -12 16.8175  2.5102  15 
  -5   4 -12 14.0891  1.7658   4 
   5   3 -12 67.4146  4.3556   7 
  -5  -3  12 59.9624  4.2868   8 
  -5  -3  12 62.9813  4.5778   6 
   4   3 -12 96.5965  6.3224   7 
  -4  -3  12 93.1086  6.1852   7 
  -4  -3  12 97.7754  6.6698   6 
  -4  -3  12 84.3007  7.3498   2 
   3   3 -12 44.0232  3.3583   7 
  -3  -3  12 38.4909  4.5028   2 
  -3  -3  12 38.3898  3.1396   7 
   2   3 -12 4.17341 1.20480   7 
  -2  -3  12 3.63179 1.72588   2 
   1   3 -12 23.2766  2.7036   7 
  -1  -3  12 29.0616  3.7054   2 
   0   3 -12 43.1951  3.7278   7 
   0   3 -12 36.8533  3.3614   4 
   0  -3  12 45.7980  4.3665   2 
  -1   3 -12 11.8145  1.9702   4 
  -1   3 -12 12.7011  2.0522   7 
   1  -3  12 9.19035 2.06783   2 
  -2   3 -12 39.2533  3.5416   7 
  -2   3 -12 43.2819  3.5340   4 
   2  -3  12 32.5047  3.9334   2 
  -3   3 -12 48.7700  3.8030   4 
   3  -3  12 40.5119  4.0084   2 
  -4   3 -12 42.1395  3.4447   4 
  -4   3 -12 41.6221  4.5206  15 
  -5   3 -12 114.190  10.491  15 
  -5   3 -12 124.002   7.305   4 
   5   2 -12 102.733   6.078   7 
  -5  -2  12 84.2222  5.9411   8 
  -5  -2  12 91.5935  6.3850   6 
   4   2 -12 32.6646  2.6493   7 
  -4  -2  12 30.4188  2.4967   7 
  -4  -2  12 31.6130  2.6641   6 
   3   2 -12 29.1574  2.6556   7 
  -3  -2  12 25.8642  3.5775   2 
  -3  -2  12 31.8601  2.5705   7 
   2   2 -12 181.988  10.604   7 
  -2  -2  12 136.251  11.642   2 
   1   2 -12 4.07045 1.28052   4 
   1   2 -12 3.14034 1.18087   7 
  -1  -2  12 4.57979 1.73198   2 
   0   2 -12 225.154  15.007   7 
   0   2 -12 223.766  13.884   4 
   0  -2  12 260.832  16.796   2 
  -1   2 -12 1.81210 1.22162   4 
  -1   2 -12 1.97453 1.20833   7 
   1  -2  12 4.19752 1.59780   2 
  -2   2 -12 157.021   9.550   4 
   2  -2  12 144.421  10.974   2 
  -3   2 -12 80.0408  5.2878   4 
   3  -2  12 65.2098  5.7777   2 
  -4   2 -12 119.291   7.169   4 
   4  -2  12 103.743   8.079   2 
  -5   2 -12 24.2317  2.1739   4 
  -5   2 -12 19.6227  2.5118  15 
   5   1 -12 24.9785  1.9446   7 
  -5  -1  12 22.3463  1.9231   6 
  -4  -1  12 22.5992  1.9834   7 
  -3  -1  12 67.3233  6.2288   2 
  -3  -1  12 84.5408  5.3812   7 
   2   1 -12 35.1979  2.9255   7 
   2   1 -12 31.4004  2.7089   4 
  -2  -1  12 33.4805  3.8494   2 
  -2  -1  12 29.3928  2.6793   7 
   1   1 -12 10.4741  1.7437   4 
   1   1 -12 11.5615  1.7662   7 
  -1  -1  12 13.4279  2.3439   2 
   0   1 -12 25.9332  2.7750   4 
   0   1 -12 17.6928  2.3168   7 
   0  -1  12 22.5206  3.0393   2 
  -1   1 -12 8.81219 1.79125   4 
   1  -1  12 8.41252 2.00612   2 
  -2   1 -12 48.4661  3.8828   4 
   2  -1  12 44.0233  4.3194   2 
  -3   1 -12 30.6564  2.9522   4 
   3  -1  12 27.3981  3.2309   2 
  -4   1 -12 45.3610  3.3578   4 
   4  -1  12 39.8305  3.7335   2 
  -5   1 -12 73.1181  4.5946   4 
   5   0 -12 35.2177  2.5367   7 
  -4   0  12 47.5049  3.3782   7 
   3   0 -12 4.79631 1.13356   4 
  -3   0  12 6.50290 1.06988   7 
   2   0 -12 23.4446  2.4526   4 
   2   0 -12 30.0211  2.4892   7 
  -2   0  12 19.9889  3.0205   2 
   1   0 -12 308.922  17.472   4 
   1   0 -12 315.282  18.834   7 
  -1   0  12 283.678  20.684   2 
   0   0 -12 70.4187  4.9992   4 
   0   0  12 66.5327  5.8029   2 
   1   0  12 356.870  24.206   2 
  -2   0 -12 28.5951  2.8845   4 
   2   0  12 20.7315  2.8638   2 
  -3   0 -12 6.16946 1.38357   4 
   3   0  12 5.74596 1.51259   2 
  -4   0 -12 12.4345  1.5339   4 
   4   0  12 7.94241 1.55612   2 
   4  -1 -12 31.5503  2.4395   7 
  -4   1  12 32.8051  2.3999   7 
   3  -1 -12 23.6439  2.0512   7 
   3  -1 -12 24.4167  2.0189   4 
  -3   1  12 20.1450  1.9018   7 
   2  -1 -12 87.9567  5.5495   4 
   2  -1 -12 83.2037  5.7871   7 
   1  -1 -12 100.915   6.243   4 
  -1   1  12 88.6887  7.3080   2 
   0  -1 -12 63.3051  4.8654   4 
   0   1  12 77.5792  5.9436   2 
  -1  -1 -12 74.3703  5.1874   4 
  -1  -1 -12 68.8737  5.4848  13 
   1   1  12 79.3082  6.1490   2 
   2   1  12 96.8950  7.4433   2 
  -3  -1 -12 46.5251  3.4010   4 
   3   1  12 45.2856  4.0188   2 
  -4  -1 -12 19.2520  1.6816   4 
   4   1  12 17.0411  2.0944   2 
   3  -2 -12 70.8445  4.7409   7 
   3  -2 -12 72.2335  4.5066   4 
   2  -2 -12 53.3049  3.7083   4 
   1  -2 -12 13.8815  1.7604   4 
   0  -2 -12 1.04796 0.87865   4 
   0   2  12 0.66240 1.16915   2 
  -1  -2 -12 11.6842  1.7978  13 
  -1  -2 -12 10.8145  1.5954   4 
   1   2  12 9.47275 1.83883   2 
  -2  -2 -12 25.3310  2.2222   4 
   2   2  12 23.3351  2.7361   2 
  -3  -2 -12 68.0526  4.3323   4 
   3   2  12 67.0129  5.2192   2 
   3  -3 -12 112.394   6.559   4 
   1  -3 -12 52.4699  3.6326   4 
   0  -3 -12 31.7252  2.5612   4 
  -1  -3 -12 58.1637  3.9685   4 
  -1  -3 -12 57.0078  4.3265  13 
   1   3  12 61.8012  4.7284   2 
  -2  -3 -12 19.7627  1.7541   4 
   2   3  12 20.3799  2.2385   2 
   1  -4 -12 54.1324  3.5164   4 
   0  -4 -12 163.771   9.412   4 
   2  12 -13 69.7137  4.9762   6 
   1  12 -13 16.0128  1.6099   6 
  -1 -12  13 10.7390  2.2926  15 
   0  12 -13 20.5122  2.0129  10 
   0  12 -13 22.8973  2.1819   6 
   0 -12  13 25.4837  3.2268  15 
  -1  12 -13 10.5857  1.3015  10 
   1 -12  13 10.7557  2.1438  15 
   2 -12  13 37.4470  4.0949  15 
   2  11 -13 19.7852  1.9140   6 
   1  11 -13 60.1796  4.2465   6 
  -1 -11  13 46.0976  5.6306  15 
   0 -11  13 86.9370  8.5283  15 
  -1  11 -13 61.4768  4.4790  10 
   1 -11  13 65.2614  6.5847  15 
  -2  11 -13 48.4171  3.4576   7 
   2 -11  13 41.5919  4.9031  15 
  -3  11 -13 31.7151  2.3680   7 
   3 -11  13 23.5527  3.2150  15 
   3  10 -13 67.5855  4.6449   6 
  -3 -10  13 57.8252  4.9616   2 
   2  10 -13 49.9799  3.8786   6 
   1  10 -13 28.3629  2.6457   6 
   0  10 -13 19.6477  2.2717   7 
   0 -10  13 30.7835  3.7660  15 
  -1  10 -13 25.2043  2.3892  10 
  -1  10 -13 19.7494  2.3425   7 
   1 -10  13 30.1854  3.7453  15 
  -2  10 -13 35.7101  3.1452   7 
  -2  10 -13 43.1735  2.9755  10 
   2 -10  13 30.7613  4.3184  15 
  -3  10 -13 39.7674  3.2356   7 
  -4  10 -13 4.19326 0.90692   7 
   4   9 -13 13.9698  1.4196   6 
  -4  -9  13 14.3812  1.9243   2 
  -3  -9  13 39.9840  3.7947   2 
   2   9 -13 73.8690  5.4430   6 
  -2  -9  13 73.7377  6.0801   2 
   0   9 -13 60.9281  5.0188   7 
   0  -9  13 81.9151  7.5006  15 
  -1   9 -13 17.6433  2.1858   7 
   1  -9  13 15.6884  3.0329  15 
  -2   9 -13 66.1168  5.1986   7 
  -2   9 -13 71.8989  4.9300  10 
  -3   9 -13 81.9334  5.9017   7 
  -4   9 -13 23.4539  2.2177   7 
  -4  -8  13 12.0758  1.9187   2 
  -3  -8  13 48.9308  4.5262   2 
  -2  -8  13 58.0601  5.2347   2 
   1   8 -13 44.2095  3.5474   7 
  -1  -8  13 42.3993  4.2956   2 
   0   8 -13 0.30921 0.90521   7 
  -1   8 -13 44.1171  3.8195   7 
  -2   8 -13 97.8649  6.7833  10 
  -2   8 -13 101.704   7.173   7 
  -3   8 -13 17.3352  2.3004   7 
  -4   8 -13 7.37240 1.36281   7 
  -4  -7  13 28.0734  2.3402   6 
  -4  -7  13 29.7389  3.0952   2 
  -3  -7  13 0.30437 0.56601   6 
  -3  -7  13 0.42254 1.25958   2 
   2   7 -13 62.0688  4.4561   7 
  -2  -7  13 56.2521  5.3849   2 
   1   7 -13 32.0183  2.9465   7 
   0   7 -13 19.5548  2.5394   7 
   0  -7  13 25.1133  3.2310   2 
  -1   7 -13 54.5789  4.5273   7 
  -2   7 -13 151.159  10.267   7 
  -3   7 -13 14.0329  2.1055   7 
  -4   7 -13 66.1439  4.4232   4 
  -4   7 -13 71.1698  5.0362   7 
  -5  -6  13 25.9143  2.0438   6 
  -4  -6  13 66.0473  4.7232   6 
  -4  -6  13 65.1790  5.4789   2 
   3   6 -13 17.6732  1.9827   7 
  -3  -6  13 20.6951  3.0209   2 
  -3  -6  13 20.8173  1.9324   6 
   2   6 -13 207.105  12.834   7 
  -2  -6  13 193.430  14.473   2 
   1   6 -13 74.7304  5.5826   7 
  -1  -6  13 77.6775  6.5781   2 
   0   6 -13 241.313  16.629   7 
   0  -6  13 286.093  18.438   2 
  -1   6 -13 85.3053  6.3464   7 
   1  -6  13 83.5064  6.8129   2 
  -2   6 -13 137.342   9.470   7 
  -3   6 -13 1.66406 1.06302   4 
  -3   6 -13 0.59939 1.06289   7 
  -4   6 -13 37.8661  2.9561   4 
  -4   6 -13 39.2582  3.2527   7 
  -5   6 -13 27.5184  2.1075   4 
  -5  -5  13 38.2273  2.8250   6 
   4   5 -13 7.75584 1.15869   7 
  -4  -5  13 8.19589 1.09948   6 
  -4  -5  13 7.16166 1.73837   2 
   3   5 -13 91.9757  6.0913   7 
  -3  -5  13 84.7623  7.2086   2 
   2   5 -13 10.0605  1.5615   7 
  -2  -5  13 9.61121 2.16181   2 
   1   5 -13 42.5742  3.6742   7 
  -1  -5  13 44.3370  4.4736   2 
   0   5 -13 0.42454 1.07030   7 
   0  -5  13 0.78105 1.30171   2 
  -1   5 -13 44.3440  3.9813   7 
   1  -5  13 45.9509  4.3863   2 
  -2   5 -13 23.3057  2.6700   7 
  -2   5 -13 16.2010  2.1248   4 
   2  -5  13 20.9226  2.7796   2 
  -3   5 -13 142.656   8.895   4 
  -3   5 -13 146.929   9.728   7 
  -4   5 -13 11.0611  2.0133  15 
  -4   5 -13 11.3325  1.5870   4 
  -5   5 -13 40.9017  2.8755   4 
   4   4 -13 30.5837  2.4432   7 
  -4  -4  13 31.5230  3.3852   2 
  -4  -4  13 28.9063  2.4211   6 
   3   4 -13 3.02421 0.93178   7 
  -3  -4  13 2.02385 1.47766   2 
   2   4 -13 5.26821 1.23838   7 
  -2  -4  13 3.97306 1.69773   2 
   1   4 -13 74.1925  5.2979   7 
  -1  -4  13 62.1978  5.9350   2 
   0  -4  13 104.653   8.302   2 
  -1   4 -13 53.7362  4.1801   4 
  -1   4 -13 58.0983  4.6928   7 
   1  -4  13 60.3034  5.2014   2 
  -2   4 -13 13.9454  1.9995   4 
  -2   4 -13 16.6441  2.2453   7 
   2  -4  13 10.8744  2.1015   2 
  -3   4 -13 28.2843  2.7146   7 
  -3   4 -13 30.5051  2.8761   4 
   3  -4  13 23.4321  2.9432   2 
  -4   4 -13 35.3877  2.7747   4 
  -4   4 -13 30.0521  3.5113  15 
  -5   4 -13 25.5965  2.0335   4 
   4   3 -13 3.18789 0.82454   7 
  -4  -3  13 1.95109 1.24306   2 
   3   3 -13 74.4628  4.9998   7 
  -3  -3  13 64.2308  5.8041   2 
   2   3 -13 162.302   9.915   7 
  -2  -3  13 136.001  11.037   2 
   1   3 -13 11.0472  1.7448   7 
  -1  -3  13 6.77075 1.96371   2 
   0   3 -13 68.3993  5.1918   7 
   0   3 -13 60.2608  4.6526   4 
   0  -3  13 74.4239  5.9850   2 
  -1   3 -13 17.7132  2.2404   4 
  -1   3 -13 18.9758  2.3946   7 
   1  -3  13 14.8819  2.5425   2 
  -2   3 -13 161.454   9.211   4 
  -2   3 -13 146.706   9.710   7 
   2  -3  13 131.777  10.525   2 
  -3   3 -13 41.8119  3.4389   4 
   3  -3  13 41.9418  3.8428   2 
  -4   3 -13 17.4985  1.9467   4 
   4   2 -13 56.3189  3.9402   7 
   3   2 -13 10.8510  1.4560   7 
  -3  -2  13 8.68650 1.88987   2 
  -2  -2  13 6.53718 1.85224   2 
   1   2 -13 94.0682  6.3953   7 
   1   2 -13 86.4514  5.8293   4 
  -1  -2  13 89.0656  7.2634   2 
   0   2 -13 31.1347  3.0813   4 
   0  -2  13 36.8077  3.7397   2 
  -1   2 -13 91.8080  5.8935   4 
  -1   2 -13 82.5545  6.0639   7 
   1  -2  13 81.2271  6.8192   2 
  -2   2 -13 5.27798 1.39190   4 
   2  -2  13 2.85931 1.39157   2 
  -3   2 -13 2.48730 1.10337   4 
   3  -2  13 4.49477 1.37563   2 
  -4   2 -13 73.0652  4.7811   4 
   4  -2  13 72.2864  5.4947   2 
   4   1 -13 54.9786  3.8020   7 
   3   1 -13 9.68435 1.33116   7 
   2   1 -13 59.7309  4.0643   4 
   2   1 -13 66.0891  4.4468   7 
  -2  -1  13 51.6755  5.0341   2 
   1   1 -13 86.9005  5.6446   4 
   1   1 -13 88.7985  6.0242   7 
  -1  -1  13 80.5215  6.8458   2 
   0   1 -13 121.527   8.324   7 
   0   1 -13 117.324   7.858   4 
   0  -1  13 141.065   9.614   2 
  -1   1 -13 77.5934  5.2612   4 
   1  -1  13 71.4166  6.1247   2 
  -2   1 -13 54.1333  3.9676   4 
   2  -1  13 50.0763  4.5706   2 
  -3   1 -13 3.94668 1.14416   4 
   3  -1  13 4.95460 1.37655   2 
   4   0 -13 2.67654 0.63914   7 
   3   0 -13 10.1224  1.2523   7 
   2   0 -13 38.6413  2.9159   7 
   2   0 -13 33.7430  2.7209   4 
   1   0 -13 78.6532  4.9754   4 
   1   0 -13 71.3506  5.0992   7 
  -1   0  13 70.9139  5.9326   2 
   0   0 -13 15.4723  2.0069   4 
   0   0  13 18.8006  2.5330   2 
  -1   0 -13 94.2730  6.2050   4 
   1   0  13 96.1235  7.3643   2 
  -2   0 -13 41.7079  3.1600   4 
   2   0  13 38.1281  3.6688   2 
  -3   0 -13 20.5233  1.9715   4 
   3   0  13 16.7538  2.1662   2 
   3  -1 -13 2.93829 0.67697   7 
   2  -1 -13 16.0185  1.6986   4 
   2  -1 -13 18.4990  1.6686   7 
   1  -1 -13 39.8104  3.0061   4 
   0  -1 -13 105.148   7.109   4 
   0   1  13 128.599   8.619   2 
  -1  -1 -13 26.3642  2.3074   4 
   1   1  13 24.2867  2.8071   2 
  -2  -1 -13 14.2277  1.6502   4 
   2   1  13 16.5277  2.1116   2 
  -3  -1 -13 1.75055 0.72883   4 
   3   1  13 1.47052 0.86243   2 
   2  -2 -13 8.78467 1.12607   4 
   1  -2 -13 2.71409 0.81593   4 
   0  -2 -13 17.9039  1.8262   4 
  -1  -2 -13 1.51293 0.74652   4 
   1   2  13 1.00253 0.96195   2 
  -2  -2 -13 10.0451  1.1776   4 
   0  11 -14 115.778   8.224  10 
   0 -11  14 145.638  11.710  15 
  -1  11 -14 17.2291  1.5910  10 
   1 -11  14 15.7378  2.4665  15 
   2 -11  14 45.0866  4.6256  15 
   2  10 -14 56.5321  4.1371   6 
   0  10 -14 39.9634  3.1399   7 
   0  10 -14 42.4714  3.2880  10 
  -1  10 -14 88.5076  5.4358  10 
  -1  10 -14 73.3138  5.4038   7 
   1 -10  14 75.5298  7.5919  15 
   2 -10  14 32.5899  3.7891  15 
  -3  10 -14 32.6964  2.6003   7 
   3   9 -14 10.2753  1.2126   6 
  -3  -9  14 13.8596  1.8615   2 
  -2  -9  14 10.3099  1.8403   2 
   1   9 -14 8.14334 1.26292   7 
   0   9 -14 107.216   7.198   7 
  -1   9 -14 4.22250 1.08703  10 
  -1   9 -14 2.18294 0.99024   7 
  -2   9 -14 12.9268  1.4153  10 
  -2   9 -14 14.6634  1.8536   7 
   2  -9  14 8.28197 2.11063  15 
  -3   9 -14 13.0886  1.6828   7 
   3   8 -14 0.86883 0.60335   6 
  -3  -8  14 0.88387 1.01182   2 
   2   8 -14 5.61139 1.06785   7 
  -2  -8  14 3.48826 1.47325   2 
   1   8 -14 102.445   6.924   7 
  -1  -8  14 103.318   7.893   2 
   0   8 -14 37.1592  3.1909   7 
  -1   8 -14 104.906   7.288   7 
  -2   8 -14 2.66278 1.10956   7 
  -2   8 -14 3.14305 0.92556  10 
  -3   8 -14 2.56676 1.00645   7 
  -4  -7  14 19.9234  2.2477   2 
  -3  -7  14 2.35988 1.23603   2 
   2   7 -14 23.8673  2.1073   7 
  -2  -7  14 16.2825  2.6611   2 
   1   7 -14 24.6748  2.3849   7 
  -1  -7  14 22.2711  3.0393   2 
   0   7 -14 21.4625  2.5100   7 
   0  -7  14 23.9501  3.0169   2 
  -1   7 -14 13.0685  1.9733   7 
  -2   7 -14 16.9084  2.2445   7 
  -3   7 -14 9.37182 1.54008   7 
  -4  -6  14 1.26126 0.92441   2 
   3   6 -14 0.29305 0.63689   7 
  -3  -6  14 1.13378 1.16381   2 
   2   6 -14 2.41650 0.89953   7 
  -2  -6  14 3.02614 1.46709   2 
   1   6 -14 47.9978  3.8523   7 
  -1  -6  14 48.1138  4.5719   2 
   0   6 -14 -0.4241  0.8293   7 
   0  -6  14 0.58226 1.24090   2 
  -1   6 -14 46.7885  4.1610   7 
   1  -6  14 55.5995  4.6184   2 
  -2   6 -14 2.10659 1.10428   7 
  -3   6 -14 1.55999 0.88560   4 
  -3   6 -14 2.92443 1.08598   7 
  -4  -5  14 34.1745  3.0922   2 
   3   5 -14 26.2663  2.2085   7 
  -3  -5  14 22.8572  2.9286   2 
   2   5 -14 13.3511  1.6960   7 
  -2  -5  14 10.8161  2.1882   2 
   1   5 -14 77.6562  5.3735   7 
  -1  -5  14 66.0422  6.0300   2 
   0   5 -14 113.112   8.311   7 
   0  -5  14 133.325   9.383   2 
  -1   5 -14 63.1304  5.0233   7 
   1  -5  14 67.3681  5.5398   2 
  -2   5 -14 20.2694  2.3801   7 
  -2   5 -14 18.7510  2.0846   4 
   2  -5  14 17.6855  2.4474   2 
  -3   5 -14 35.4120  2.8160   4 
  -3   5 -14 37.0653  3.0471   7 
  -4   5 -14 21.9044  1.8760   4 
   4   4 -14 83.4308  5.4121   7 
   3   4 -14 26.3293  2.2159   7 
  -3  -4  14 23.3262  2.8746   2 
   2   4 -14 24.9392  2.3313   7 
  -2  -4  14 24.5632  3.1434   2 
   1   4 -14 74.5975  5.1260   7 
  -1  -4  14 60.6970  5.7199   2 
   0   4 -14 16.7891  2.2023   7 
   0  -4  14 16.3161  2.5558   2 
  -1   4 -14 88.7562  6.1001   7 
  -1   4 -14 80.8064  5.4114   4 
   1  -4  14 80.9839  6.6346   2 
  -2   4 -14 13.0820  1.7426   4 
  -2   4 -14 13.0961  1.7844   7 
   2  -4  14 10.9510  1.9583   2 
  -3   4 -14 20.3609  2.0639   4 
   3  -4  14 19.2207  2.3209   2 
  -4   4 -14 206.378  11.766   4 
   4   3 -14 73.0492  4.7812   7 
   3   3 -14 12.9554  1.4816   7 
  -3  -3  14 13.0731  2.0228   2 
   2   3 -14 2.35843 0.88905   7 
  -2  -3  14 0.43821 1.18778   2 
   1   3 -14 19.0069  2.2032   7 
  -1  -3  14 22.2425  2.8820   2 
   0   3 -14 2.69308 1.08361   7 
   0   3 -14 0.21590 0.87711   4 
   0  -3  14 2.77561 1.36547   2 
  -1   3 -14 16.9315  2.0363   4 
  -1   3 -14 16.8375  2.1101   7 
   1  -3  14 20.6329  2.6628   2 
  -2   3 -14 12.0498  1.6838   4 
   2  -3  14 9.59592 1.81248   2 
  -3   3 -14 41.6620  3.0117   4 
   3  -3  14 36.1343  3.3553   2 
   3   2 -14 66.3824  4.1658   7 
  -3  -2  14 51.4578  4.6119   2 
   2   2 -14 54.2820  3.7012   7 
  -2  -2  14 42.0268  4.1692   2 
   1   2 -14 71.6488  5.1199   7 
   1   2 -14 71.3110  4.6604   4 
  -1  -2  14 74.5331  5.9480   2 
   0   2 -14 1.46541 0.93443   7 
   0   2 -14 1.93446 0.98285   4 
   0  -2  14 1.42229 1.23436   2 
  -1   2 -14 77.1866  5.1735   4 
   1  -2  14 79.0574  6.2421   2 
  -2   2 -14 45.0310  3.2991   4 
   2  -2  14 41.3401  3.8060   2 
  -3   2 -14 44.6033  3.0017   4 
   3  -2  14 35.7461  3.3546   2 
   3   1 -14 52.3802  3.6044   7 
   2   1 -14 23.8140  2.0119   7 
  -2  -1  14 21.0999  2.5593   2 
   1   1 -14 5.24822 1.03445   7 
   1   1 -14 4.73809 1.04194   4 
  -1  -1  14 4.86322 1.47656   2 
   0   1 -14 21.5452  2.1988   4 
   0  -1  14 24.7870  2.8679   2 
  -1   1 -14 4.32765 1.09639   4 
   1  -1  14 4.14571 1.34462   2 
  -2   1 -14 40.2136  2.9278   4 
   2  -1  14 37.3302  3.4395   2 
   2   0 -14 2.18039 0.66158   7 
   1   0 -14 26.4654  2.0366   4 
  -1   0  14 21.7788  2.5198   2 
   0   0 -14 102.293   6.648   4 
   0   0  14 120.242   8.104   2 
  -1   0 -14 26.5508  2.2327   4 
   1   0  14 29.4723  2.7940   2 
  -2   0 -14 10.3363  1.2648   4 
   2   0  14 9.71044 1.50394   2 
   0  -1 -14 2.28284 0.73030   4 
   1   9 -15 51.1063  3.5868   7 
   0   9 -15 30.7264  2.5169   7 
   0   9 -15 30.9870  2.5475  10 
  -1   9 -15 62.0936  4.6862   7 
  -1   9 -15 73.0200  4.6005  10 
  -2   9 -15 0.99080 0.70304   7 
  -2  -8  15 20.2664  2.3673   2 
   1   8 -15 10.9299  1.3799   7 
  -1  -8  15 9.42391 1.69160   2 
   0   8 -15 0.08276 0.69783   7 
  -1   8 -15 14.5929  1.7698   7 
  -2   8 -15 23.5265  2.2186   7 
   2   7 -15 21.6304  1.8517   7 
  -2  -7  15 17.5404  2.3252   2 
   1   7 -15 18.2084  1.8938   7 
  -1  -7  15 15.9482  2.2509   2 
   0   7 -15 108.268   7.703   7 
   0  -7  15 126.244   8.558   2 
  -1   7 -15 30.0586  2.7108   7 
  -2   7 -15 30.5992  2.6787   7 
   2   6 -15 68.8895  4.7135   7 
  -2  -6  15 68.2407  5.4711   2 
   1   6 -15 3.44006 0.98620   7 
  -1  -6  15 3.83037 1.34655   2 
   0   6 -15 104.637   7.338   7 
   0  -6  15 114.066   8.123   2 
  -1   6 -15 4.36862 1.16934   7 
   1  -6  15 6.13747 1.47104   2 
  -2   6 -15 88.4301  6.0645   7 
   2   5 -15 119.661   7.363   7 
  -2  -5  15 104.742   8.215   2 
   1   5 -15 20.5007  2.1066   7 
  -1  -5  15 16.8870  2.4391   2 
   0   5 -15 2.05787 0.93882   7 
   0  -5  15 3.30662 1.27791   2 
  -1   5 -15 21.0386  2.2339   7 
   1  -5  15 20.4013  2.4360   2 
  -2   5 -15 129.858   8.412   7 
   2   4 -15 22.3390  1.9237   7 
  -2  -4  15 17.9631  2.3550   2 
   1   4 -15 38.8754  3.0106   7 
  -1  -4  15 34.6748  3.4786   2 
   0   4 -15 13.2658  1.7177   7 
   0  -4  15 16.0253  2.2256   2 
  -1   4 -15 46.2157  3.5860   7 
   1  -4  15 48.8565  4.0997   2 
  -2   4 -15 44.5853  2.8959   4 
   2  -4  15 36.0604  3.3789   2 
   2   3 -15 23.6462  1.9992   7 
  -2  -3  15 23.6058  2.5829   2 
   1   3 -15 85.6028  5.5867   7 
  -1  -3  15 78.6772  6.2818   2 
   0   3 -15 0.72264 0.73781   7 
   0  -3  15 0.30583 0.96409   2 
  -1   3 -15 54.5360  3.7601   4 
   1  -3  15 62.3088  4.7480   2 
  -2   3 -15 13.4109  1.4532   4 
   1   2 -15 29.7359  2.3814   7 
  -1  -2  15 31.6849  2.9226   2 
   0   2 -15 -0.5257  0.5994   4 
   0  -2  15 1.69036 0.99113   2 
  -1   2 -15 23.5255  1.9143   4 
   0   0   0    0.00    0.00   0 
; 
_shelx_hkl_checksum   56806 
  
